# Supplementary material
Source: MDPI journal article supplement (https://www.mdpi.com/2311-7524/9/3/345)
Supplement: s1 [file s1]

Archive with 4 entries (4 files):
- Supplementary Figure S1.pdf
- Supplementary Figure S2.pdf
- Supplementary Table S1,S2,S4-S6.xlsx
- Supplementary Table S3.xls
