# Supplementary material
Source: MDPI journal article supplement (https://www.mdpi.com/2311-7524/9/3/345)
Supplement: s1 [file s1 › Supplementary Figure S2.pdf]

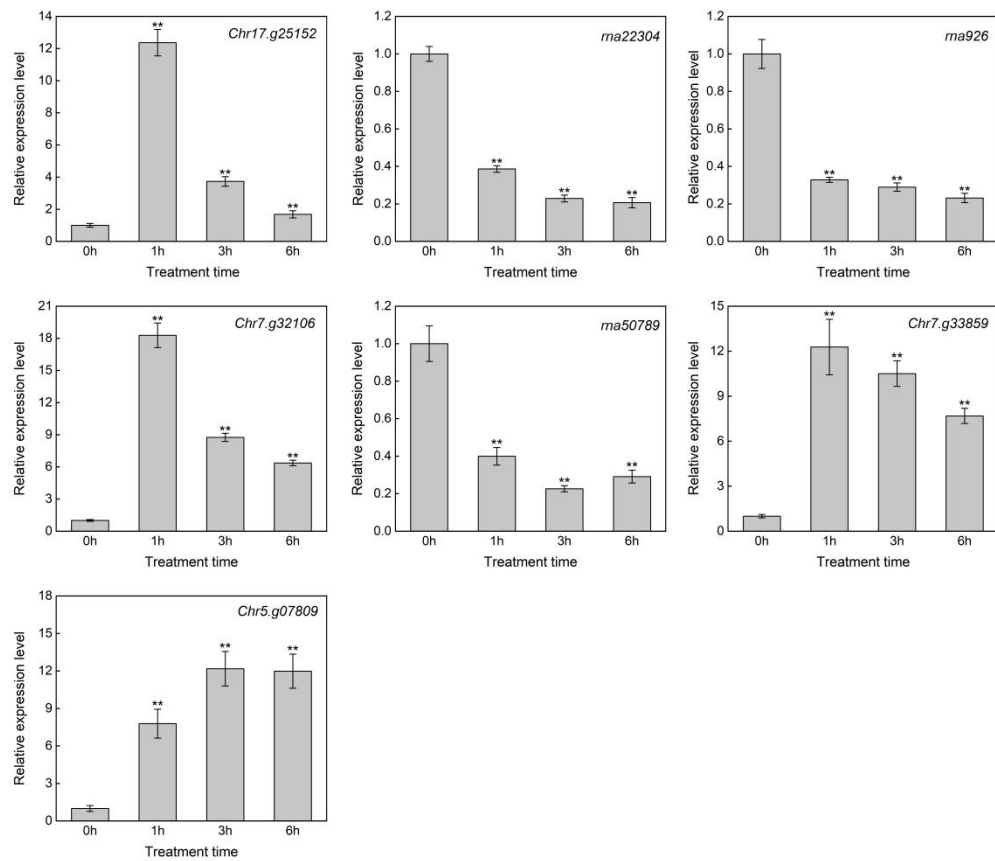

Supplementary Figure S2. From 127 genes, seven genes that responded strongly to the *Valsa* canker were selected for validation. Expression of seven NLR genes in wild-type suspension cells treated with 20% *VpM*. Asterisk means significantly different at  $P < 0.05$  (\*) and  $P < 0.01$  (\*\*). Vertical bars represent  $\pm$  SD.
