# Supplementary material
Source: MDPI journal article supplement (https://www.mdpi.com/2311-7524/9/3/345)
Supplement: s1 [file s1 › Supplementary Table S1,S2,S4-S6.xlsx]

## Sheet: S1
Species	Database	Version	Download links
Physomitrella patens	JGI PhytozomeV13	Ppatens_318_v3.3	https://genome.jgi.doe.gov/portal/pages/dynamicOrganismDownload.jsf?organism=Phytozome
Selaginella moellendorffii	JGI PhytozomeV13	Smoellendorffii_91_v1.0	https://genome.jgi.doe.gov/portal/pages/dynamicOrganismDownload.jsf?organism=Phytozome
Phoenix dactylifera）	NCBI	GCF_000413155.1 DPV01	ftp://ftp.ncbi.nlm.nih.gov/genomes/all/GCF/000/413/155/GCF_000413155.1_DPV01/
Oryza sativa	RAP-DB	Os-Nipponbare-Reference-IRGSP-1.0 release-2019-08-29	https://rapdb.dna.affrc.go.jp/download/irgsp1.html
Musa acuminata	Banana Genome Hub	DH Pahang v2	https://banana-genome-hub.southgreen.fr/download
Solanum tuberosum	PGSC	v403	http://solanaceae.plantbiology.msu.edu/pgsc_download.shtml
Solanum lycopersicum	Sol Genomics Network	SL3.0 and ITAG3.20	ftp://ftp.sgn.cornell.edu/genomes/Solanum_lycopersicum/annotation/ITAG3.2_release/
Vitis vinifera	Grape Genome Database	12x	ftp://ftp.ensemblgenomes.org/pub/plants/release-48/fasta/vitis_vinifera/pep/
Arabidopsis thaliana	Ensembl	TAIR10	ftp://ftp.ensemblgenomes.org/pub/release-45/plants/fasta/arabidopsis_thaliana/
Populus trichocarpa	JGI PhytozomeV13	Ptrichocarpa_444_v3.1	https://genome.jgi.doe.gov/portal/pages/dynamicOrganismDownload.jsf?organism=Phytozome
Rubus occidentalis	Genome Database For Rosaceae	v3.0	ftp://ftp.bioinfo.wsu.edu/www.rosaceae.org/Rubus_occidentalis/Rubus_occidentalis-genome.v3.0/
Rosa chinensis	Genome Database For Rosaceae	v2.0.a1	ftp://ftp.bioinfo.wsu.edu/www.rosaceae.org/Rosa_chinensis/Rchinensis_Old_Blush_homozygous_genome-v2.0/
Fragaria vesca	Genome Database For Rosaceae	v4.0.a2	ftp://ftp.bioinfo.wsu.edu/www.rosaceae.org/Fragaria_vesca/Fvesca-genome.v4.0.a2/
Malus x domestica	Genome Database For Rosaceae	GDDH13_1-1	ftp://ftp.bioinfo.wsu.edu/www.rosaceae.org/Malus_x_domestica/Malus_x_domestica-genome_GDDH13_v1.1/
Malus baccata	Genome Database For Rosaceae	v1.0	ftp://ftp.bioinfo.wsu.edu/www.rosaceae.org/Malus_baccata/mbaccata_v1.0/
Prunus persica	Genome Database For Rosaceae	v2.0.a1	ftp://ftp.bioinfo.wsu.edu/www.rosaceae.org/Prunus_persica/Prunus_persica-genome.v2.0.a1/
Prunus armeniaca	Genome Database For Rosaceae	v1.0	ftp://ftp.bioinfo.wsu.edu/www.rosaceae.org/Prunus_armeniaca/parmeniaca_v1.0/
Pyrus bretschneideri	Genome Database For Rosaceae	v1.1	ftp://ftp.bioinfo.wsu.edu/www.rosaceae.org/Pyrus_x_bretschneideri/Pbretschneideri-genome.v1.1/
Pyrus betulifolia	Genome Database For Rosaceae	v1.0	ftp://ftp.bioinfo.wsu.edu/www.rosaceae.org/Pyrus_betulifolia/pbetulifolia_v1.0/

## Sheet: S2
Gene accession
>Chr17.g25152	Upstream Primer	TCTCCAACTGTTCTTCTCTTGCATC
	Downstream Primer	TATGGACAAACTTTCAAGGGATGCA
>rna22304	Upstream Primer	TGTTGTCCTGATCTAACTTCCATGC
	Downstream Primer	GGAAGAAGAAGAGGCAGAAACATCA
>rna926	Upstream Primer	TCCTTCCCTTTCCCTGATTTTCAAG
	Downstream Primer	GTGTTGAATTTGTTGAGGCAGAGAC
>Chr7.g32106	Upstream Primer	GGATCAATGGCGTGCAATTTCAATA
	Downstream Primer	TATGTCCCTTGTTCTGAACTGTTGG
>rna50789	Upstream Primer	TTCGACGATATTTGGAGGGCAATAG
	Downstream Primer	TTTTCACAAACAAGGCCCAAGAATC
>Chr7.g33859	Upstream Primer	TGTAATAGACTCGAATCGCTTGTGG
	Downstream Primer	AACTAGATTCCAATTGTCACCCACC
>Chr5.g07809	Upstream Primer	ATTTGCCTTCATCAGTTTGGTCTCT
	Downstream Primer	TTGCTGTCCCACTCAAATCTAACTC

## Sheet: S4
		GroupI	GroupII	GroupIII	GroupIV	GroupV	GroupVI	GroupVII	GroupVIII	GroupIX	GroupXI	GroupXII	GroupXIII	GroupXIV	GroupXV
Physcomitrella patens	Ppa	0	0	0	0	0	0	0	0	0	0	0	0	0	0
Selaginella moellendorffii	Smo	0	0	0	0	2.66667	0	0	0.0434783	0.5	0.5	0.352941	0	0.7	0
Phoenix dactylifera	Pda	1.41667	1.88889	6.5	0	4.66667	2.36364	1.36364	0.478261	0	0	0	0	0	0
Oryza sativa	Osa	0.416667	1.77778	8	0	7.33333	1.45455	2.81818	0.347826	0.5	0	0	0	0	0
Musa acuminata	Mac	0.666667	2.33333	2	0	0	2.27273	0.727273	0.347826	0.5	0	0	0	0	0
Solanum tuberosum	Stu	1.5	0	11	4.75	0	0	2.63636	0.695652	0	0.5	0.764706	2.27273	0	0
Solanum lycopersicum	Sly	0.583333	0	3.5	0.5	0	0	1.81818	0.26087	1	0.5	0.352941	0	0.7	0
Vitis vinifera	Vvi	6.16667	0	7	0	0	0	3.54545	3.78261	5	0.5	0	0	0	1
Arabidopsis thaliana	Ath	0.166667	0	0	0	6	0	0.363636	1.04348	1.5	1	0.0588235	0	0	2.63636
Populus trichocarpa	Ptr	2.25	0	21.5	9.25	6.33333	0	1.54545	3.91304	0	1	2.82353	0.0909091	1.2	1.0303
Rubus occidentalis	Roc	1.16667	0	2.5	0.75	7	0	1.72727	1	3.5	0.5	0.117647	0.181818	0.1	0.030303
Rosa chinensis	Rch	4.5	0	9	9.75	4	0	4.27273	2.86957	5	1	1	3.09091	2.95	0.757576
Fragaria vesca	Fve	0	0	0.5	1.5	4	0	0.545455	2.47826	2	1	0.529412	0.909091	1.8	0.515152
Malus x domestica	Mde	5.25	0	12	7.25	19.3333	0	2.27273	0.782609	3	0.5	3.29412	0.727273	1	1.51515
Malus baccata	Mba	4.25	0	12.5	3.75	0	0	1.45455	0.826087	3.5	0.5	3.58824	0.636364	1.05	1.27273
Prunus persica	Ppe	2.33333	0	9	3.75	0	0	4.63636	0.826087	0.5	1	1.47059	2.63636	2.2	0.333333
Prunus armeniaca	Par	1.91667	0	0	4.25	0.333333	0	3.27273	1.04348	2	2	2.11765	2.36364	2.3	0.333333
Pyrus bretschneideri	Pbr	3.58333	0	12.5	4.5	0.333333	0	1.36364	0.826087	4.5	0.5	5.82353	0	0	2.0303
Pyrus betulifolia	Pbe	4.33333	0	9.5	5.5	1.33333	0	1.36364	1.04348	4.5	0.5	4.35294	2.09091	1.7	1.63636

## Sheet: S5
Gene_id	Leaf	Root	Fruit flesh	Apex	stem	Whole seedling	Flower full bloom	Average
All	15.2782	15.2782	15.2782	15.2782	16.7708	15.2782	15.2782	15.4914
All NLR	2.26609	3.59948	1.65151	2.38771	2.62098	1.47797	2.66904	2.38183
GroupI	1.20333	1.65033	1.933	1.779	1.95281	0.957899	2.10357	1.65428
GroupIII	1.60267	2.56287	0.896015	2.09586	2.30062	1.82177	3.38761	2.09535
GroupIV	1.22586	1.83226	1.46816	1.91572	2.10288	1.67389	1.85679	1.72508
GroupV	0.986135	0.858887	1.73794	1.28391	1.40934	0.758772	1.47554	1.21579
GroupVII	2.37732	3.31504	1.33973	3.87078	4.24895	0.961353	1.84232	2.56507
GroupVIII	0.492795	1.03518	1.3297	1.19005	1.30632	0.746814	1.17458	1.03935
GroupIX	3.1432	3.35775	1.3753	1.52589	1.67496	0.850066	2.66125	2.08406
GroupXII	3.62442	7.14797	1.80161	3.3119	3.63546	2.01934	3.55768	3.58548
GroupXIII	3.45761	3.995	1.54856	3.1249	3.4302	3.82105	4.13943	3.35954
GroupXIV	3.79981	3.9042	1.81183	3.33014	3.65549	1.42361	3.51074	3.06226
GroupXV	3.13817	5.78003	1.77219	2.22692	2.44448	1.75314	3.36319	2.92545

## Sheet: S6
		Pyrus betulifolia
	WT		T1	T2	T3
all_Average	338.811		464.973	478.886	490.173
all_NLR_Average	131.145		204.443	158.4	152.469
		Pyrus bretschneideri
	WT		T1	T2	T3
all_Average	329.12		466.956	489.8	498.857
all_NLR_Average	127.114		196.62	145.613	154.249
