# Supplementary material
Source: MDPI journal article supplement (https://www.mdpi.com/2311-7524/9/3/345)
Supplement: s1 [file s1 › Supplementary Table S3.xls]

## Sheet: Physcomitrella patens
Class	Gene_id	protein_id	NBS_domain/ids	CC_domain_Predicted	Descript
TIR-NBS	Pp3c10_15970	Pp3c10_15970V3.1.p	NB-ARC,PF00931.23,TIR,PF01582.21,TIR_2,PF13676.7,AAA_14,PF13173.7	'No_CC'	transmembrane receptors;ATP binding
NBS-LRR	Pp3c10_20790	Pp3c10_20790V3.1.p	LRR_4,PF12799.8	'No_CC'	disease resistance protein (TIR-NBS-LRR class)
TIR-NBS-LRR	Pp3c10_21680	Pp3c10_21680V3.1.p	NB-ARC,PF00931.23,TIR,PF01582.21,LRR_4,PF12799.8,TIR_2,PF13676.7,LRR_8,PF13855.7	'No_CC'	disease resistance protein (TIR-NBS-LRR class)
TIR-NBS-LRR	Pp3c10_21693	Pp3c10_21693V3.1.p	NB-ARC,PF00931.23,TIR,PF01582.21,LRR_4,PF12799.8,TIR_2,PF13676.7,LRR_8,PF13855.7	'No_CC'	disease resistance protein (TIR-NBS-LRR class)
NBS-LRR	Pp3c10_50	Pp3c10_50V3.1.p	NB-ARC,PF00931.23,LRR_8,PF13855.7,LRR_4,PF12799.8,RPW8,PF05659.12	'No_CC'	disease resistance protein (TIR-NBS-LRR class), putative
TIR-NBS	Pp3c11_110	Pp3c11_110V3.3.p	TIR_2,PF13676.7,NB-ARC,PF00931.23	'No_CC'	Disease resistance protein (TIR-NBS-LRR class) family
NBS	Pp3c11_21080	Pp3c11_21080V3.1.p	NB-ARC,PF00931.23	'No_CC'	Disease resistance protein (TIR-NBS-LRR class) family
NBS-LRR	Pp3c11_3280	Pp3c11_3280V3.1.p	NB-ARC,PF00931.23,LRR_4,PF12799.8	'No_CC'	disease resistance protein (TIR-NBS-LRR class)
NBS-LRR	Pp3c1_17930	Pp3c1_17930V3.1.p	LRR_4,PF12799.8,NB-ARC,PF00931.23,LRR_5,PF13306.7,LRR_8,PF13855.7,PK_Tyr_Ser-Thr,PF07714.18	'No_CC'	disease resistance protein (TIR-NBS-LRR class)
NBS-LRR	Pp3c13_13820	Pp3c13_13820V3.1.p	LRR_4,PF12799.8,NB-ARC,PF00931.23,LRR_8,PF13855.7	'No_CC'	disease resistance protein (TIR-NBS-LRR class)
NBS	Pp3c13_15190	Pp3c13_15190V3.1.p	Pkinase,PF00069.26,PK_Tyr_Ser-Thr,PF07714.18,NB-ARC,PF00931.23	'No_CC'	VH1-interacting kinase
NBS	Pp3c13_15200	Pp3c13_15200V3.1.p	Pkinase,PF00069.26,PK_Tyr_Ser-Thr,PF07714.18,NB-ARC,PF00931.23	'No_CC'	disease resistance protein (TIR-NBS-LRR class)
NBS-LRR	Pp3c13_15270	Pp3c13_15270V3.1.p	LRR_4,PF12799.8,Pkinase,PF00069.26,PK_Tyr_Ser-Thr,PF07714.18,NB-ARC,PF00931.23,LRR_8,PF13855.7,LRR_1,PF00560.34	'No_CC'	disease resistance protein (TIR-NBS-LRR class)
NBS	Pp3c13_19900	Pp3c13_19900V3.1.p	NB-ARC,PF00931.23	'No_CC'	Disease resistance protein (TIR-NBS-LRR class) family
NBS	Pp3c13_21290	Pp3c13_21290V3.3.p	PK_Tyr_Ser-Thr,PF07714.18,Pkinase,PF00069.26,NB-ARC,PF00931.23	'No_CC'	disease resistance protein (TIR-NBS-LRR class)
NBS	Pp3c13_21690	Pp3c13_21690V3.2.p	NB-ARC,PF00931.23,PK_Tyr_Ser-Thr,PF07714.18,Pkinase,PF00069.26	'No_CC'	Protein kinase family protein
NBS-LRR	Pp3c13_21810	Pp3c13_21810V3.1.p	NB-ARC,PF00931.23,Pkinase,PF00069.26,PK_Tyr_Ser-Thr,PF07714.18,LRR_4,PF12799.8,AAA,PF00004.30	'No_CC'	disease resistance protein (TIR-NBS-LRR class), putative
NBS	Pp3c13_22110	Pp3c13_22110V3.1.p	NB-ARC,PF00931.23	'No_CC'	transmembrane receptors;ATP binding
NBS	Pp3c13_2500	Pp3c13_2500V3.1.p	NB-ARC,PF00931.23	'No_CC'	Disease resistance protein (TIR-NBS-LRR class)
NBS-LRR	Pp3c13_2610	Pp3c13_2610V3.1.p	LRR_4,PF12799.8,Pkinase,PF00069.26,PK_Tyr_Ser-Thr,PF07714.18,NB-ARC,PF00931.23,LRR_8,PF13855.7	'No_CC'	disease resistance protein (TIR-NBS-LRR class)
NBS	Pp3c13_2820	Pp3c13_2820V3.1.p	PK_Tyr_Ser-Thr,PF07714.18,Pkinase,PF00069.26,NB-ARC,PF00931.23	'No_CC'	Protein kinase superfamily protein
NBS-LRR	Pp3c13_2900	Pp3c13_2900V3.1.p	LRR_4,PF12799.8,NB-ARC,PF00931.23,LRR_8,PF13855.7	'No_CC'	disease resistance protein (TIR-NBS-LRR class)
NBS-LRR	Pp3c13_2910	Pp3c13_2910V3.1.p	Pkinase,PF00069.26,PK_Tyr_Ser-Thr,PF07714.18,NB-ARC,PF00931.23,LRR_4,PF12799.8	'No_CC'	disease resistance protein (TIR-NBS-LRR class)
NBS-LRR	Pp3c13_3150	Pp3c13_3150V3.1.p	NB-ARC,PF00931.23,LRR_4,PF12799.8,LRR_8,PF13855.7	'No_CC'	disease resistance protein (TIR-NBS-LRR class), putative
NBS	Pp3c1_40	Pp3c1_40V3.1.p	NB-ARC,PF00931.23	'No_CC'	HOPZ-ACTIVATED RESISTANCE 1
NBS	Pp3c14_1111	Pp3c14_1111V3.1.p	NB-ARC,PF00931.23,Pkinase,PF00069.26,PK_Tyr_Ser-Thr,PF07714.18	'No_CC'	disease resistance protein (TIR-NBS-LRR class), putative
NBS	Pp3c14_11360	Pp3c14_11360V3.1.p	NB-ARC,PF00931.23	'No_CC'	Disease resistance protein (TIR-NBS-LRR class) family
NBS	Pp3c14_13230	Pp3c14_13230V3.1.p	NB-ARC,PF00931.23	'No_CC'	disease resistance protein (TIR-NBS-LRR class), putative
TIR-NBS-LRR	Pp3c14_5850	Pp3c14_5850V3.1.p	TIR_2,PF13676.7,LRR_4,PF12799.8,NB-ARC,PF00931.23	'No_CC'	disease resistance protein (TIR-NBS-LRR class)
NBS	Pp3c14_6750	Pp3c14_6750V3.2.p	PK_Tyr_Ser-Thr,PF07714.18,NB-ARC,PF00931.23,Pkinase,PF00069.26	'No_CC'	Disease resistance protein (TIR-NBS-LRR class)
NBS-LRR	Pp3c14_8120	Pp3c14_8120V3.1.p	LRR_4,PF12799.8,Pkinase,PF00069.26,PK_Tyr_Ser-Thr,PF07714.18,NB-ARC,PF00931.23,LRR_8,PF13855.7,LRR_1,PF00560.34	'No_CC'	disease resistance protein (TIR-NBS-LRR class)
NBS-LRR	Pp3c15_14980	Pp3c15_14980V3.1.p	LRR_4,PF12799.8,LRR_8,PF13855.7,NB-ARC,PF00931.23,ATPase_2,PF01637.19	'No_CC'	disease resistance protein (TIR-NBS-LRR class)
NBS-LRR	Pp3c15_16800	Pp3c15_16800V3.1.p	NB-ARC,PF00931.23,Pkinase,PF00069.26,PK_Tyr_Ser-Thr,PF07714.18,LRR_4,PF12799.8,LRR_8,PF13855.7	'No_CC'	disease resistance protein (TIR-NBS-LRR class)
NBS	Pp3c15_2320	Pp3c15_2320V3.1.p	NB-ARC,PF00931.23	'No_CC'	disease resistance protein (TIR-NBS-LRR class), putative
NBS	Pp3c15_960	Pp3c15_960V3.1.p	NB-ARC,PF00931.23	'No_CC'	disease resistance protein (TIR-NBS-LRR class), putative
NBS-LRR	Pp3c16_20430	Pp3c16_20430V3.1.p	NB-ARC,PF00931.23,LRR_8,PF13855.7,LRR_4,PF12799.8	'No_CC'	NB-ARC domain-containing disease resistance protein
NBS	Pp3c16_23160	Pp3c16_23160V3.1.p	PK_Tyr_Ser-Thr,PF07714.18,Pkinase,PF00069.26,NB-ARC,PF00931.23	'No_CC'	transmembrane receptors;ATP binding
NBS	Pp3c17_20870	Pp3c17_20870V3.1.p	PK_Tyr_Ser-Thr,PF07714.18,Pkinase,PF00069.26,NB-ARC,PF00931.23	'No_CC'	transmembrane receptors;ATP binding
NBS	Pp3c17_20880	Pp3c17_20880V3.1.p	PK_Tyr_Ser-Thr,PF07714.18,Pkinase,PF00069.26,NB-ARC,PF00931.23	'No_CC'	transmembrane receptors;ATP binding
NBS	Pp3c17_21730	Pp3c17_21730V3.1.p	NB-ARC,PF00931.23,PK_Tyr_Ser-Thr,PF07714.18,Pkinase,PF00069.26	'No_CC'	disease resistance protein (TIR-NBS-LRR class), putative
NBS	Pp3c17_21740	Pp3c17_21740V3.1.p	NB-ARC,PF00931.23,PK_Tyr_Ser-Thr,PF07714.18,Pkinase,PF00069.26	'No_CC'	transmembrane receptors;ATP binding
NBS	Pp3c17_8750	Pp3c17_8750V3.1.p	NB-ARC,PF00931.23	'No_CC'	disease resistance protein (TIR-NBS-LRR class), putative
TIR-NBS-LRR	Pp3c17_9290	Pp3c17_9290V3.3.p	TIR_2,PF13676.7,NB-ARC,PF00931.23,LRR_4,PF12799.8	'No_CC'	disease resistance protein (TIR-NBS-LRR class)
NBS	Pp3c18_2410	Pp3c18_2410V3.1.p	NB-ARC,PF00931.23,Pkinase,PF00069.26,PK_Tyr_Ser-Thr,PF07714.18	'No_CC'	Disease resistance protein (TIR-NBS-LRR class) family
NBS-LRR	Pp3c18_2880	Pp3c18_2880V3.2.p	Pkinase,PF00069.26,PK_Tyr_Ser-Thr,PF07714.18,LRR_4,PF12799.8,NB-ARC,PF00931.23,LRR_8,PF13855.7,CPSase_L_D3,PF02787.20	'No_CC'	disease resistance protein (TIR-NBS-LRR class)
NBS	Pp3c18_4530	Pp3c18_4530V3.1.p	Pkinase,PF00069.26,PK_Tyr_Ser-Thr,PF07714.18,NB-ARC,PF00931.23,Kinesin,PF00225.24	'No_CC'	disease resistance protein (TIR-NBS-LRR class)
NBS	Pp3c19_2480	Pp3c19_2480V3.1.p	NB-ARC,PF00931.23	'No_CC'	NB-ARC domain-containing disease resistance protein
NBS	Pp3c20_15850	Pp3c20_15850V3.2.p	NB-ARC,PF00931.23,PK_Tyr_Ser-Thr,PF07714.18	'No_CC'	transmembrane receptors;ATP binding
NBS	Pp3c20_15960	Pp3c20_15960V3.1.p	PK_Tyr_Ser-Thr,PF07714.18,NB-ARC,PF00931.23,Pkinase,PF00069.26	'No_CC'	Protein kinase superfamily protein with octicosapeptide/Phox/Bem1p domain
NBS-LRR	Pp3c20_20760	Pp3c20_20760V3.1.p	LRR_4,PF12799.8,LRR_8,PF13855.7,NB-ARC,PF00931.23	'No_CC'	disease resistance protein (TIR-NBS-LRR class)
NBS-LRR	Pp3c20_20770	Pp3c20_20770V3.1.p	Pkinase,PF00069.26,PK_Tyr_Ser-Thr,PF07714.18,LRR_8,PF13855.7,LRR_4,PF12799.8,NB-ARC,PF00931.23	'No_CC'	disease resistance protein (TIR-NBS-LRR class)
NBS	Pp3c20_21210	Pp3c20_21210V3.1.p	NB-ARC,PF00931.23	'No_CC'	Disease resistance protein (TIR-NBS-LRR class) family
NBS	Pp3c20_21220	Pp3c20_21220V3.2.p	NB-ARC,PF00931.23,PK_Tyr_Ser-Thr,PF07714.18,Pkinase,PF00069.26	'No_CC'	transmembrane receptors;ATP binding
NBS	Pp3c20_22230	Pp3c20_22230V3.1.p	NB-ARC,PF00931.23	'No_CC'	Disease resistance protein (TIR-NBS-LRR class) family
NBS-LRR	Pp3c20_22840	Pp3c20_22840V3.2.p	LRR_8,PF13855.7,LRR_4,PF12799.8,LRR_5,PF13306.7,NB-ARC,PF00931.23,Pkinase,PF00069.26,SF3A3,PF16837.6	'No_CC'	disease resistance protein (TIR-NBS-LRR class)
NBS-LRR	Pp3c20_22850	Pp3c20_22850V3.1.p	LRR_8,PF13855.7,LRR_4,PF12799.8,LRR_5,PF13306.7,NB-ARC,PF00931.23,SF3A3,PF16837.6	'No_CC'	disease resistance protein (TIR-NBS-LRR class)
NBS	Pp3c20_2990	Pp3c20_2990V3.1.p	NB-ARC,PF00931.23	'No_CC'	--
NBS	Pp3c21_11820	Pp3c21_11820V3.1.p	Pkinase,PF00069.26,PK_Tyr_Ser-Thr,PF07714.18	'No_CC'	Protein kinase family protein
NBS-LRR	Pp3c21_14179	Pp3c21_14179V3.1.p	NB-ARC,PF00931.23,LRR_8,PF13855.7	'No_CC'	disease resistance protein (TIR-NBS-LRR class)
NBS	Pp3c21_14710	Pp3c21_14710V3.1.p	NB-ARC,PF00931.23	'No_CC'	Disease resistance protein (TIR-NBS-LRR class) family
NBS-LRR	Pp3c21_15570	Pp3c21_15570V3.1.p	LRR_4,PF12799.8,PK_Tyr_Ser-Thr,PF07714.18,Pkinase,PF00069.26,NB-ARC,PF00931.23,LRR_8,PF13855.7,LRR_1,PF00560.34	'No_CC'	disease resistance protein (TIR-NBS-LRR class)
NBS	Pp3c21_18280	Pp3c21_18280V3.1.p	NB-ARC,PF00931.23	'No_CC'	disease resistance protein (TIR-NBS-LRR class)
NBS-LRR	Pp3c2_12940	Pp3c2_12940V3.1.p	NB-ARC,PF00931.23,PK_Tyr_Ser-Thr,PF07714.18,Pkinase,PF00069.26,LRR_8,PF13855.7,LRR_4,PF12799.8	'No_CC'	disease resistance protein (TIR-NBS-LRR class), putative
NBS	Pp3c2_12950	Pp3c2_12950V3.1.p	NB-ARC,PF00931.23	'No_CC'	Disease resistance protein (TIR-NBS-LRR class) family
NBS	Pp3c2_13120	Pp3c2_13120V3.1.p	NB-ARC,PF00931.23	'No_CC'	Disease resistance protein (TIR-NBS-LRR class) family
NBS	Pp3c21_3920	Pp3c21_3920V3.1.p	NB-ARC,PF00931.23	'No_CC'	disease resistance protein (TIR-NBS-LRR class), putative
NBS	Pp3c21_6260	Pp3c21_6260V3.1.p	NB-ARC,PF00931.23	'No_CC'	Disease resistance protein (TIR-NBS-LRR class) family
NBS	Pp3c21_7380	Pp3c21_7380V3.1.p	NB-ARC,PF00931.23,Pkinase,PF00069.26,PK_Tyr_Ser-Thr,PF07714.18	'No_CC'	transmembrane receptors;ATP binding
NBS	Pp3c21_8750	Pp3c21_8750V3.1.p	Pkinase,PF00069.26,PK_Tyr_Ser-Thr,PF07714.18,NB-ARC,PF00931.23	'No_CC'	VH1-interacting kinase
NBS	Pp3c21_8760	Pp3c21_8760V3.1.p	NB-ARC,PF00931.23	'No_CC'	transmembrane receptors;ATP binding
TIR-NBS-LRR	Pp3c22_1030	Pp3c22_1030V3.3.p	NB-ARC,PF00931.23,TIR,PF01582.21,TIR_2,PF13676.7,LRR_8,PF13855.7,TPR_2,PF07719.18,TPR_1,PF00515.29,TPR_9,PF13371.7,TPR_14,PF13428.7,TPR_19,PF14559.7,TPR_16,PF13432.7	'No_CC'	disease resistance protein (TIR-NBS-LRR class)
NBS-LRR	Pp3c22_2140	Pp3c22_2140V3.2.p	Pkinase,PF00069.26,PK_Tyr_Ser-Thr,PF07714.18,LRR_4,PF12799.8,LRR_8,PF13855.7,NB-ARC,PF00931.23	'No_CC'	disease resistance protein (TIR-NBS-LRR class)
NBS-LRR	Pp3c22_5030	Pp3c22_5030V3.1.p	NB-ARC,PF00931.23,LRR_4,PF12799.8,LRR_8,PF13855.7,ZZ,PF00569.18	'No_CC'	disease resistance protein (TIR-NBS-LRR class), putative
NBS	Pp3c2_2620	Pp3c2_2620V3.2.p	Pkinase,PF00069.26,PK_Tyr_Ser-Thr,PF07714.18,NB-ARC,PF00931.23	'No_CC'	Protein kinase family protein
NBS	Pp3c2_29670	Pp3c2_29670V3.2.p	NB-ARC,PF00931.23	'No_CC'	transmembrane receptors;ATP binding
NBS	Pp3c23_12000	Pp3c23_12000V3.1.p	NB-ARC,PF00931.23	'No_CC'	NB-ARC domain-containing disease resistance protein
TIR-NBS-LRR	Pp3c23_230	Pp3c23_230V3.1.p	LRR_4,PF12799.8,TIR_2,PF13676.7,NB-ARC,PF00931.23	'No_CC'	Disease resistance protein (TIR-NBS-LRR class) family
TIR-NBS	Pp3c2_5130	Pp3c2_5130V3.3.p	TIR_2,PF13676.7,NB-ARC,PF00931.23	'No_CC'	Disease resistance protein (TIR-NBS-LRR class) family
TIR-NBS-LRR	Pp3c26_15380	Pp3c26_15380V3.1.p	NB-ARC,PF00931.23,LRR_4,PF12799.8,TIR,PF01582.21,TIR_2,PF13676.7,LRR_8,PF13855.7,TPR_9,PF13371.7	'No_CC'	disease resistance protein (TIR-NBS-LRR class), putative
NBS	Pp3c2_730	Pp3c2_730V3.1.p	Pkinase,PF00069.26,PK_Tyr_Ser-Thr,PF07714.18,NB-ARC,PF00931.23	'No_CC'	Protein kinase family protein
NBS-LRR	Pp3c2_780	Pp3c2_780V3.1.p	LRR_8,PF13855.7,LRR_4,PF12799.8,Pkinase,PF00069.26,PK_Tyr_Ser-Thr,PF07714.18,NB-ARC,PF00931.23,LPD22,PF18834.2,OAS1_C,PF10421.10	'No_CC'	disease resistance protein (TIR-NBS-LRR class)
NBS-LRR	Pp3c3_11530	Pp3c3_11530V3.1.p	NB-ARC,PF00931.23,LRR_8,PF13855.7	'No_CC'	disease resistance protein (TIR-NBS-LRR class)
NBS-LRR	Pp3c3_1260	Pp3c3_1260V3.3.p	NB-ARC,PF00931.23,LRR_8,PF13855.7,LRR_4,PF12799.8	'No_CC'	ADR1-like 2
NBS-LRR	Pp3c3_1280	Pp3c3_1280V3.1.p	NB-ARC,PF00931.23,LRR_8,PF13855.7,LRR_4,PF12799.8	'No_CC'	NB-ARC domain-containing disease resistance protein
NBS-LRR	Pp3c3_1350	Pp3c3_1350V3.2.p	NB-ARC,PF00931.23,LRR_8,PF13855.7,LRR_4,PF12799.8	'No_CC'	ADR1-like 2
NBS	Pp3c3_1460	Pp3c3_1460V3.1.p	NB-ARC,PF00931.23	'No_CC'	Disease resistance protein (CC-NBS-LRR class) family
NBS-LRR	Pp3c3_1480	Pp3c3_1480V3.2.p	NB-ARC,PF00931.23,LRR_8,PF13855.7,LRR_4,PF12799.8	'No_CC'	ADR1-like 2
NBS	Pp3c3_1700	Pp3c3_1700V3.1.p	Pkinase,PF00069.26,PK_Tyr_Ser-Thr,PF07714.18,NB-ARC,PF00931.23,NACHT,PF05729.13	'No_CC'	Disease resistance protein (TIR-NBS-LRR class) family
NBS-LRR	Pp3c3_17280	Pp3c3_17280V3.1.p	LRR_4,PF12799.8,LRR_8,PF13855.7,NB-ARC,PF00931.23	'No_CC'	disease resistance protein (TIR-NBS-LRR class)
NBS-LRR	Pp3c3_38130	Pp3c3_38130V3.1.p	NB-ARC,PF00931.23,LRR_8,PF13855.7,LRR_4,PF12799.8	'No_CC'	disease resistance protein (TIR-NBS-LRR class)
NBS-LRR	Pp3c3_570	Pp3c3_570V3.1.p	NB-ARC,PF00931.23,LRR_8,PF13855.7,LRR_4,PF12799.8	'No_CC'	LRR and NB-ARC domains-containing disease resistance protein
NBS	Pp3c4_30410	Pp3c4_30410V3.1.p	NB-ARC,PF00931.23	'No_CC'	Disease resistance protein (TIR-NBS-LRR class) family
NBS	Pp3c5_2300	Pp3c5_2300V3.1.p	NB-ARC,PF00931.23	'No_CC'	--
NBS-LRR	Pp3c6_11870	Pp3c6_11870V3.1.p	LRR_4,PF12799.8,LRR_8,PF13855.7,Pkinase,PF00069.26,PK_Tyr_Ser-Thr,PF07714.18,NB-ARC,PF00931.23	'No_CC'	disease resistance protein (TIR-NBS-LRR class)
NBS-LRR	Pp3c6_19080	Pp3c6_19080V3.1.p	NB-ARC,PF00931.23,LRR_8,PF13855.7,LRR_4,PF12799.8	'No_CC'	target of AVRB operation1
NBS	Pp3c6_19100	Pp3c6_19100V3.1.p	NB-ARC,PF00931.23	'No_CC'	transmembrane receptors;ATP binding
NBS-LRR	Pp3c6_22490	Pp3c6_22490V3.1.p	LRR_4,PF12799.8,NB-ARC,PF00931.23,LRR_9,PF14580.7	'No_CC'	Disease resistance protein (TIR-NBS-LRR class) family
NBS-LRR	Pp3c6_5450	Pp3c6_5450V3.2.p	LRR_4,PF12799.8,LRR_8,PF13855.7,Pkinase,PF00069.26,PK_Tyr_Ser-Thr,PF07714.18,NB-ARC,PF00931.23,LRR_1,PF00560.34	'No_CC'	disease resistance protein (TIR-NBS-LRR class), putative
NBS	Pp3c6_5610	Pp3c6_5610V3.1.p	PK_Tyr_Ser-Thr,PF07714.18,Pkinase,PF00069.26,NB-ARC,PF00931.23	'No_CC'	Protein kinase superfamily protein
NBS	Pp3c6_5620	Pp3c6_5620V3.1.p	PK_Tyr_Ser-Thr,PF07714.18,Pkinase,PF00069.26,NB-ARC,PF00931.23	'No_CC'	Disease resistance protein (TIR-NBS-LRR class) family
NBS	Pp3c6_5920	Pp3c6_5920V3.1.p	Pkinase,PF00069.26,PK_Tyr_Ser-Thr,PF07714.18,NB-ARC,PF00931.23	'No_CC'	Protein kinase family protein
NBS	Pp3c6_5930	Pp3c6_5930V3.1.p	Pkinase,PF00069.26,PK_Tyr_Ser-Thr,PF07714.18,NB-ARC,PF00931.23	'No_CC'	Protein kinase family protein
NBS-LRR	Pp3c6_8150	Pp3c6_8150V3.1.p	NB-ARC,PF00931.23,LRR_8,PF13855.7	'No_CC'	disease resistance protein (TIR-NBS-LRR class), putative
NBS	Pp3c7_21000	Pp3c7_21000V3.1.p	NB-ARC,PF00931.23	'No_CC'	Disease resistance protein (TIR-NBS-LRR class) family
NBS	Pp3c7_21100	Pp3c7_21100V3.1.p	NB-ARC,PF00931.23,PK_Tyr_Ser-Thr,PF07714.18,Pkinase,PF00069.26	'No_CC'	Disease resistance protein (TIR-NBS-LRR class)
NBS	Pp3c7_21110	Pp3c7_21110V3.1.p	Pkinase,PF00069.26,PK_Tyr_Ser-Thr,PF07714.18,NB-ARC,PF00931.23	'No_CC'	Disease resistance protein (TIR-NBS-LRR class) family
NBS	Pp3c7_21870	Pp3c7_21870V3.2.p	Flp_N,PF03930.15,CRISPR_Cas2,PF09827.10,AHH,PF14412.7	'No_CC'	disease resistance protein (TIR-NBS-LRR class)
NBS	Pp3c7_21880	Pp3c7_21880V3.1.p	NB-ARC,PF00931.23	'No_CC'	Disease resistance protein (CC-NBS-LRR class) family
NBS	Pp3c7_4440	Pp3c7_4440V3.1.p	NB-ARC,PF00931.23	'No_CC'	disease resistance protein (TIR-NBS-LRR class), putative
NBS	Pp3c8_2020	Pp3c8_2020V3.2.p	NB-ARC,PF00931.23	'No_CC'	disease resistance protein (TIR-NBS-LRR class)
NBS-LRR	Pp3c8_2150	Pp3c8_2150V3.2.p	Pkinase,PF00069.26,PK_Tyr_Ser-Thr,PF07714.18,NB-ARC,PF00931.23,LRR_8,PF13855.7	'No_CC'	disease resistance protein (TIR-NBS-LRR class)
NBS	Pp3c9_10230	Pp3c9_10230V3.1.p	NB-ARC,PF00931.23	'No_CC'	transmembrane receptors;ATP binding
NBS-LRR	Pp3c9_10550	Pp3c9_10550V3.5.p	LRR_8,PF13855.7,NB-ARC,PF00931.23,LRR_4,PF12799.8,ATPase_2,PF01637.19	'No_CC'	disease resistance protein (TIR-NBS-LRR class), putative
NBS-LRR	Pp3c9_16400	Pp3c9_16400V3.1.p	NB-ARC,PF00931.23,LRR_4,PF12799.8,LRR_8,PF13855.7	'No_CC'	disease resistance protein (TIR-NBS-LRR class)
NBS	Pp3s794_20	Pp3s794_20V3.1.p	NB-ARC,PF00931.23	'No_CC'	transmembrane receptors;ATP binding

## Sheet: Selaginella moellendorffii
Class	Gene_id	protein_id	NBS_domain/ids	CC_domain_Predicted	Descript
NBS	105865	105865	NB-ARC,PF00931.23	'No_CC'	ADR1-like 1
NBS	110560	110560	NB-ARC,PF00931.23	'No_CC'	LRR and NB-ARC domains-containing disease resistance protein
NBS	110600	110600	NB-ARC,PF00931.23	'No_CC'	LRR and NB-ARC domains-containing disease resistance protein
NBS	110609	110609	NB-ARC,PF00931.23	'No_CC'	NB-ARC domain-containing disease resistance protein
NBS	110652	110652	NB-ARC,PF00931.23	'No_CC'	LRR and NB-ARC domains-containing disease resistance protein
NBS	110698	110698	NB-ARC,PF00931.23	'No_CC'	LRR and NB-ARC domains-containing disease resistance protein
NBS	111732	111732	NB-ARC,PF00931.23	'No_CC'	NB-ARC domain-containing disease resistance protein
NBS	26669	26669	NB-ARC,PF00931.23	'No_CC'	NB-ARC domain-containing disease resistance protein
NBS	37836	37836	NB-ARC,PF00931.23	'No_CC'	ADR1-like 2
NBS	411495	411495	NB-ARC,PF00931.23	'No_CC'	--
NBS-LRR	415649	415649	NB-ARC,PF00931.23,LRR_4,PF12799.8,AAA_16,PF13191.7	'No_CC'	Disease resistance protein (TIR-NBS-LRR class) family
NBS-LRR	418928	418928	NB-ARC,PF00931.23,LRR_4,PF12799.8,LRR_8,PF13855.7	'No_CC'	NB-ARC domain-containing disease resistance protein
NBS-LRR	419040	419040	LRR_4,PF12799.8,LRR_8,PF13855.7,NB-ARC,PF00931.23	'No_CC'	LRR and NB-ARC domains-containing disease resistance protein
CC-NBS	427019	427019	NB-ARC,PF00931.23,Jas_motif,PF09425.11,tify,PF06200.15	'CC_region'	Disease resistance protein (TIR-NBS-LRR class) family
NBS-LRR	429055	429055	NB-ARC,PF00931.23,LRR_8,PF13855.7	'No_CC'	Disease resistance protein (CC-NBS-LRR class) family
NBS	444345	444345	NB-ARC,PF00931.23,AAA_22,PF13401.7	'No_CC'	Disease resistance protein (CC-NBS-LRR class) family
NBS	90705	90705	NB-ARC,PF00931.23	'No_CC'	Disease resistance protein (TIR-NBS-LRR class)

## Sheet: Phoenix dactylifera
Class	Gene_id	protein_id	NBS_domain/ids	CC_domain_Predicted	Descript
NBS	103695659	XP_008775257.1	NB-ARC,PF00931.23,Rx_N,PF18052.2	'No_CC'	putative disease resistance protein RGA3 [Phoenix dactylifera]
NBS	103695750	XP_008775378.1	NB-ARC,PF00931.23,Rx_N,PF18052.2	'No_CC'	disease resistance protein RPM1-like isoform X1 [Phoenix dactylifera]
CC-NBS-LRR	103695752	XP_026656447.1	NB-ARC,PF00931.23,Rx_N,PF18052.2,LRR_4,PF12799.8	'CC_region'	disease resistance protein RPM1-like [Phoenix dactylifera]
NBS	103695753	XP_026656448.1	NB-ARC,PF00931.23,Rx_N,PF18052.2	'No_CC'	disease resistance protein RPM1-like [Phoenix dactylifera]
CC-NBS-LRR	103696223	XP_008775988.2	NB-ARC,PF00931.23,Rx_N,PF18052.2,LRR_4,PF12799.8,LRR_8,PF13855.7	'CC_region'	putative disease resistance protein RGA3 [Phoenix dactylifera]
CC-NBS-LRR	103696869	XP_026656846.1	NB-ARC,PF00931.23,Rx_N,PF18052.2,LRR_8,PF13855.7	'CC_region'	uncharacterized protein LOC103696869 [Phoenix dactylifera]
NBS-LRR	103696877	XP_026656848.1	NB-ARC,PF00931.23,LRR_4,PF12799.8,LRR_8,PF13855.7	'No_CC'	LOW QUALITY PROTEIN: probable disease resistance protein At1g58602 [Phoenix dactylifera]
NBS	103696879	XP_026656849.1	NB-ARC,PF00931.23,Rx_N,PF18052.2	'No_CC'	LOW QUALITY PROTEIN: putative disease resistance RPP13-like protein 3 [Phoenix dactylifera]
NBS-LRR	103697003	XP_017696062.2	NB-ARC,PF00931.23,LRR_4,PF12799.8	'No_CC'	putative disease resistance protein RGA4 isoform X1 [Phoenix dactylifera]
NBS-LRR	103697020	XP_026656901.1	NB-ARC,PF00931.23,Rx_N,PF18052.2,LRR_4,PF12799.8,LRR_8,PF13855.7	'No_CC'	putative disease resistance protein RGA4 [Phoenix dactylifera]
NBS-LRR	103697328	XP_026656999.1	NB-ARC,PF00931.23,LRR_8,PF13855.7,LRR_4,PF12799.8	'No_CC'	putative disease resistance protein RGA1 [Phoenix dactylifera]
NBS	103697344	XP_008777408.3	NB-ARC,PF00931.23,Rx_N,PF18052.2	'No_CC'	LOW QUALITY PROTEIN: disease resistance protein RPM1-like [Phoenix dactylifera]
NBS-LRR	103697346	XP_026657006.1	NB-ARC,PF00931.23,LRR_8,PF13855.7	'No_CC'	disease resistance protein RPM1-like [Phoenix dactylifera]
NBS	103697347	XP_008777410.1	NB-ARC,PF00931.23	'No_CC'	disease resistance protein RPM1-like [Phoenix dactylifera]
NBS-LRR	103697351	XP_008777414.1	NB-ARC,PF00931.23,Rx_N,PF18052.2,LRR_8,PF13855.7,LRR_4,PF12799.8	'No_CC'	putative disease resistance protein RGA3 [Phoenix dactylifera]
NBS-LRR	103697352	XP_017696136.1	NB-ARC,PF00931.23,LRR_8,PF13855.7,LRR_4,PF12799.8	'No_CC'	putative disease resistance RPP13-like protein 1 [Phoenix dactylifera]
NBS	103697581	XP_008777694.3	NB-ARC,PF00931.23,Rx_N,PF18052.2,AAA_16,PF13191.7	'No_CC'	LOW QUALITY PROTEIN: disease resistance protein RPM1-like [Phoenix dactylifera]
CC-NBS-LRR	103697663	XP_026657129.1	NB-ARC,PF00931.23,LRR_8,PF13855.7	'CC_region'	disease resistance protein SUMM2-like [Phoenix dactylifera]
NBS	103697869	XP_008778031.1	NB-ARC,PF00931.23,Rx_N,PF18052.2	'No_CC'	putative disease resistance protein At1g50180 [Phoenix dactylifera]
NBS	103697870	XP_026657204.1	NB-ARC,PF00931.23	'No_CC'	LOW QUALITY PROTEIN: putative disease resistance RPP13-like protein 3 [Phoenix dactylifera]
NBS-LRR	103697892	XP_008778056.1	NB-ARC,PF00931.23,Rx_N,PF18052.2,LRR_8,PF13855.7	'No_CC'	putative disease resistance RPP13-like protein 1 [Phoenix dactylifera]
NBS-LRR	103698007	XP_026657259.1	NB-ARC,PF00931.23,Rx_N,PF18052.2,LRR_8,PF13855.7,LRR_4,PF12799.8	'No_CC'	putative disease resistance protein RGA3 [Phoenix dactylifera]
NBS	103698173	XP_026657314.1	NB-ARC,PF00931.23,Rx_N,PF18052.2	'No_CC'	LOW QUALITY PROTEIN: disease resistance protein RPM1-like [Phoenix dactylifera]
NBS-LRR	103698195	XP_017696325.1	NB-ARC,PF00931.23,Rx_N,PF18052.2,LRR_8,PF13855.7,LRR_4,PF12799.8	'No_CC'	putative disease resistance protein RGA3 isoform X1 [Phoenix dactylifera]
NBS-LRR	103698277	XP_026657339.1	NB-ARC,PF00931.23,Rx_N,PF18052.2,LRR_8,PF13855.7,LRR_4,PF12799.8	'No_CC'	probable disease resistance RPP8-like protein 2 [Phoenix dactylifera]
NBS-LRR	103698334	XP_008778551.3	NB-ARC,PF00931.23,LRR_8,PF13855.7,LRR_4,PF12799.8	'No_CC'	LOW QUALITY PROTEIN: putative disease resistance protein RGA3 [Phoenix dactylifera]
NBS	103698358	XP_008778575.1	NB-ARC,PF00931.23	'No_CC'	putative disease resistance protein RGA3 [Phoenix dactylifera]
NBS	103698361	XP_026657354.1	NB-ARC,PF00931.23,Rx_N,PF18052.2	'No_CC'	putative disease resistance RPP13-like protein 1 [Phoenix dactylifera]
NBS-LRR	103698421	XP_026657385.1	NB-ARC,PF00931.23,Rx_N,PF18052.2,LRR_8,PF13855.7	'No_CC'	putative disease resistance protein RGA3 [Phoenix dactylifera]
NBS-LRR	103698422	XP_008778655.1	NB-ARC,PF00931.23,Rx_N,PF18052.2,LRR_4,PF12799.8,LRR_8,PF13855.7	'No_CC'	disease resistance protein RGA2-like, partial [Phoenix dactylifera]
NBS-LRR	103698546	XP_008778799.2	NB-ARC,PF00931.23,Rx_N,PF18052.2,LRR_4,PF12799.8,LRR_8,PF13855.7	'No_CC'	putative disease resistance protein At1g50180 [Phoenix dactylifera]
NBS	103698569	XP_008778826.1	NB-ARC,PF00931.23	'No_CC'	putative disease resistance protein RGA4 [Phoenix dactylifera]
NBS-LRR	103698712	XP_026657489.1	NB-ARC,PF00931.23,Rx_N,PF18052.2,LRR_8,PF13855.7,LRR_4,PF12799.8	'No_CC'	disease resistance protein RGA2-like [Phoenix dactylifera]
NBS	103698734	XP_026657493.1	NB-ARC,PF00931.23,Rx_N,PF18052.2	'No_CC'	putative disease resistance RPP13-like protein 3, partial [Phoenix dactylifera]
CC-NBS-LRR	103698869	XP_026657526.1	NB-ARC,PF00931.23,Rx_N,PF18052.2,LRR_4,PF12799.8,LRR_8,PF13855.7	'CC_region'	putative disease resistance protein RGA3, partial [Phoenix dactylifera]
NBS	103698956	XP_008779228.3	NB-ARC,PF00931.23,Rx_N,PF18052.2	'No_CC'	disease resistance protein RPP13-like, partial [Phoenix dactylifera]
NBS-LRR	103699107	XP_008779382.3	NB-ARC,PF00931.23,Rx_N,PF18052.2,LRR_4,PF12799.8,AAA_22,PF13401.7	'No_CC'	putative disease resistance RPP13-like protein 3 [Phoenix dactylifera]
NBS-LRR	103699214	XP_008779484.1	NB-ARC,PF00931.23,LRR_8,PF13855.7,LRR_4,PF12799.8	'No_CC'	putative disease resistance RPP13-like protein 1 [Phoenix dactylifera]
NBS-LRR	103699254	XP_008779518.1	NB-ARC,PF00931.23,LRR_8,PF13855.7,LRR_4,PF12799.8	'No_CC'	putative disease resistance RPP13-like protein 1, partial [Phoenix dactylifera]
NBS	103699325	XP_008779578.1	NB-ARC,PF00931.23,Rx_N,PF18052.2,AAA_16,PF13191.7	'No_CC'	putative disease resistance protein RGA3, partial [Phoenix dactylifera]
NBS	103699340	XP_008779593.1	NB-ARC,PF00931.23,Rx_N,PF18052.2	'No_CC'	putative disease resistance protein RGA4 [Phoenix dactylifera]
NBS-LRR	103699396	XP_026657646.1	NB-ARC,PF00931.23,LRR_4,PF12799.8,LRR_8,PF13855.7	'No_CC'	putative disease resistance protein RGA3 [Phoenix dactylifera]
NBS	103699416	XP_026657652.1	NB-ARC,PF00931.23	'No_CC'	putative disease resistance protein RGA3 [Phoenix dactylifera]
CC-NBS	103699446	XP_008779687.2	NB-ARC,PF00931.23	'CC_region'	probable disease resistance protein At5g63020, partial [Phoenix dactylifera]
NBS	103699495	XP_026657666.1	NB-ARC,PF00931.23	'No_CC'	putative disease resistance RPP13-like protein 1 [Phoenix dactylifera]
NBS	103699516	XP_026657673.1	NB-ARC,PF00931.23,Rx_N,PF18052.2	'No_CC'	putative disease resistance protein RGA4 [Phoenix dactylifera]
NBS-LRR	103699550	XP_008779792.2	NB-ARC,PF00931.23,LRR_8,PF13855.7,LRR_4,PF12799.8	'No_CC'	putative disease resistance protein RGA4, partial [Phoenix dactylifera]
NBS	103699572	XP_008779817.3	NB-ARC,PF00931.23,Rx_N,PF18052.2	'No_CC'	putative disease resistance protein RGA3, partial [Phoenix dactylifera]
CC-NBS	103699592	XP_008779834.1	NB-ARC,PF00931.23,Rx_N,PF18052.2	'CC_region'	putative disease resistance protein RGA1, partial [Phoenix dactylifera]
NBS	103699612	XP_008779852.1	NB-ARC,PF00931.23,Rx_N,PF18052.2,TniB,PF05621.12	'No_CC'	putative disease resistance protein RGA3 [Phoenix dactylifera]
CC-NBS	103699668	XP_008779898.1	NB-ARC,PF00931.23,Rx_N,PF18052.2	'CC_region'	putative disease resistance protein RGA1 [Phoenix dactylifera]
NBS-LRR	103699689	XP_008779914.1	NB-ARC,PF00931.23,LRR_4,PF12799.8,LRR_8,PF13855.7	'No_CC'	putative disease resistance protein RGA3 [Phoenix dactylifera]
NBS-LRR	103699709	XP_008779934.2	NB-ARC,PF00931.23,LRR_8,PF13855.7,LRR_4,PF12799.8	'No_CC'	putative disease resistance protein RGA3, partial [Phoenix dactylifera]
NBS	103699771	XP_008779997.2	NB-ARC,PF00931.23,Rx_N,PF18052.2	'No_CC'	disease resistance protein RGA2-like, partial [Phoenix dactylifera]
CC-NBS	103699839	XP_026657738.1	NB-ARC,PF00931.23,Rx_N,PF18052.2	'CC_region'	putative disease resistance protein RGA3 [Phoenix dactylifera]
NBS-LRR	103699854	XP_008780073.1	LRR_4,PF12799.8,LRR_8,PF13855.7,NB-ARC,PF00931.23	'No_CC'	putative disease resistance protein RGA3, partial [Phoenix dactylifera]
NBS	103699894	XP_008780110.1	NB-ARC,PF00931.23,Rx_N,PF18052.2	'No_CC'	putative disease resistance protein RGA3, partial [Phoenix dactylifera]
CC-NBS	103699954	XP_008780162.3	NB-ARC,PF00931.23	'CC_region'	probable disease resistance protein At5g63020, partial [Phoenix dactylifera]
NBS	103699963	XP_026657758.1	NB-ARC,PF00931.23	'No_CC'	disease resistance protein RGA2-like, partial [Phoenix dactylifera]
NBS	103700038	XP_008780237.2	NB-ARC,PF00931.23	'No_CC'	putative disease resistance RPP13-like protein 1, partial [Phoenix dactylifera]
CC-NBS	103700079	XP_008780273.1	NB-ARC,PF00931.23,Rx_N,PF18052.2	'CC_region'	putative disease resistance protein RGA3 [Phoenix dactylifera]
NBS-LRR	103700104	XP_008780298.1	NB-ARC,PF00931.23,LRR_8,PF13855.7,LRR_4,PF12799.8	'No_CC'	putative disease resistance protein RGA3, partial [Phoenix dactylifera]
NBS	103700211	XP_008780394.2	NB-ARC,PF00931.23,Rx_N,PF18052.2	'No_CC'	disease resistance protein RGA2-like, partial [Phoenix dactylifera]
NBS	103700275	XP_008780450.1	NB-ARC,PF00931.23	'No_CC'	disease resistance protein RGA2-like, partial [Phoenix dactylifera]
NBS	103700373	XP_008780541.1	NB-ARC,PF00931.23	'No_CC'	putative disease resistance protein RGA3, partial [Phoenix dactylifera]
NBS	103700443	XP_008780608.2	NB-ARC,PF00931.23,AAA_16,PF13191.7	'No_CC'	putative disease resistance protein RGA3, partial [Phoenix dactylifera]
NBS-LRR	103700486	XP_008780646.3	LRR_8,PF13855.7,NB-ARC,PF00931.23,LRR_4,PF12799.8	'No_CC'	disease resistance protein RPS5-like, partial [Phoenix dactylifera]
NBS-LRR	103700919	XP_017696754.1	NB-ARC,PF00931.23,Rx_N,PF18052.2,LRR_4,PF12799.8,LRR_8,PF13855.7	'No_CC'	putative disease resistance protein RGA3 [Phoenix dactylifera]
NBS-LRR	103702538	XP_008783237.1	NB-ARC,PF00931.23,Rx_N,PF18052.2,LRR_4,PF12799.8,LRR_8,PF13855.7	'No_CC'	disease resistance protein RPM1-like [Phoenix dactylifera]
NBS-LRR	103703271	XP_026658857.1	NB-ARC,PF00931.23,LRR_8,PF13855.7	'No_CC'	disease resistance protein RPS5-like [Phoenix dactylifera]
CC-NBS	103703399	XP_008784469.1	NB-ARC,PF00931.23	'CC_region'	probable disease resistance protein At5g63020 [Phoenix dactylifera]
CC-NBS	103704328	XP_008785786.2	NB-ARC,PF00931.23,Rx_N,PF18052.2	'CC_region'	putative disease resistance protein RGA3 [Phoenix dactylifera]
NBS-LRR	103704402	XP_017697597.1	NB-ARC,PF00931.23,LRR_4,PF12799.8,LRR_8,PF13855.7	'No_CC'	putative disease resistance RPP13-like protein 1 [Phoenix dactylifera]
CC-NBS	103705927	XP_008788061.2	NB-ARC,PF00931.23	'CC_region'	disease resistance protein RPM1-like [Phoenix dactylifera]
CC-NBS-LRR	103706310	XP_026660139.1	NB-ARC,PF00931.23,Rx_N,PF18052.2,LRR_4,PF12799.8,LRR_8,PF13855.7	'CC_region'	putative disease resistance protein RGA1 [Phoenix dactylifera]
NBS-LRR	103706817	XP_017698190.1	NB-ARC,PF00931.23,LRR_8,PF13855.7	'No_CC'	probable disease resistance protein At5g63020 [Phoenix dactylifera]
NBS-LRR	103706818	XP_017698188.2	NB-ARC,PF00931.23,LRR_8,PF13855.7,LRR_4,PF12799.8	'No_CC'	probable disease resistance protein At5g63020 [Phoenix dactylifera]
NBS-LRR	103707323	XP_008789981.1	NB-ARC,PF00931.23,Rx_N,PF18052.2,LRR_4,PF12799.8,LRR_8,PF13855.7	'No_CC'	disease resistance protein RGA2-like isoform X1 [Phoenix dactylifera]
NBS-LRR	103707381	XP_026660554.1	NB-ARC,PF00931.23,Rx_N,PF18052.2,LRR_4,PF12799.8,LRR_8,PF13855.7	'No_CC'	putative disease resistance protein RGA1 [Phoenix dactylifera]
CC-NBS-LRR	103707674	XP_008790471.1	NB-ARC,PF00931.23,Rx_N,PF18052.2,LRR_8,PF13855.7,LRR_4,PF12799.8	'CC_region'	putative disease resistance protein RGA3 [Phoenix dactylifera]
NBS	103707680	XP_026660659.1	NB-ARC,PF00931.23,Rx_N,PF18052.2	'No_CC'	putative disease resistance protein RGA4 [Phoenix dactylifera]
CC-NBS	103707692	XP_026660670.1	NB-ARC,PF00931.23,Rx_N,PF18052.2	'CC_region'	putative disease resistance protein RGA1 [Phoenix dactylifera]
NBS	103707918	XP_008790858.3	NB-ARC,PF00931.23,Rx_N,PF18052.2,AAA_16,PF13191.7	'No_CC'	disease resistance protein RPM1-like [Phoenix dactylifera]
NBS-LRR	103708164	XP_026659967.1	NB-ARC,PF00931.23,Rx_N,PF18052.2,LRR_4,PF12799.8	'No_CC'	disease resistance RPP8-like protein 3, partial [Phoenix dactylifera]
NBS	103708275	XP_008791344.1	NB-ARC,PF00931.23	'No_CC'	putative disease resistance protein RGA3 [Phoenix dactylifera]
NBS-LRR	103708303	XP_026660901.1	NB-ARC,PF00931.23,LRR_8,PF13855.7,LRR_4,PF12799.8	'No_CC'	putative disease resistance protein RGA3 isoform X1 [Phoenix dactylifera]
NBS-LRR	103708453	XP_008791603.1	LRR_4,PF12799.8,LRR_8,PF13855.7,NB-ARC,PF00931.23	'No_CC'	putative disease resistance RPP13-like protein 1 [Phoenix dactylifera]
NBS	103709150	XP_008792596.1	NB-ARC,PF00931.23,RPW8,PF05659.12	'No_CC'	putative disease resistance protein At5g47280 [Phoenix dactylifera]
NBS-LRR	103710105	XP_008793943.3	NB-ARC,PF00931.23,LRR_4,PF12799.8,LRR_8,PF13855.7	'No_CC'	putative disease resistance protein RGA4 [Phoenix dactylifera]
CC-NBS-LRR	103710156	XP_026661643.1	NB-ARC,PF00931.23,LRR_8,PF13855.7,LRR_4,PF12799.8,Rx_N,PF18052.2	'CC_region'	putative disease resistance protein RGA1 [Phoenix dactylifera]
NBS-LRR	103710853	XP_026661943.1	NB-ARC,PF00931.23,Rx_N,PF18052.2,LRR_4,PF12799.8,LRR_8,PF13855.7	'No_CC'	disease resistance protein RGA2-like [Phoenix dactylifera]
NBS	103711166	XP_026661314.1	NB-ARC,PF00931.23,Rx_N,PF18052.2	'No_CC'	disease resistance protein RGA2-like [Phoenix dactylifera]
NBS	103712008	XP_008796593.1	NB-ARC,PF00931.23	'No_CC'	LOW QUALITY PROTEIN: uncharacterized protein LOC103712008 [Phoenix dactylifera]
NBS-LRR	103712306	XP_026662461.1	NB-ARC,PF00931.23,Rx_N,PF18052.2,LRR_4,PF12799.8,LRR_8,PF13855.7	'No_CC'	LOW QUALITY PROTEIN: putative disease resistance protein RGA3 [Phoenix dactylifera]
NBS-LRR	103712450	XP_026662508.1	NB-ARC,PF00931.23,Rx_N,PF18052.2,LRR_8,PF13855.7,LRR_4,PF12799.8,TniB,PF05621.12	'No_CC'	putative disease resistance protein RGA3 [Phoenix dactylifera]
NBS-LRR	103712484	XP_008797235.3	NB-ARC,PF00931.23,Rx_N,PF18052.2,LRR_8,PF13855.7	'No_CC'	putative disease resistance protein RGA3, partial [Phoenix dactylifera]
NBS-LRR	103712773	XP_008797616.1	NB-ARC,PF00931.23,Rx_N,PF18052.2,LRR_4,PF12799.8	'No_CC'	putative disease resistance protein At1g50180 [Phoenix dactylifera]
NBS	103712872	XP_008797786.1	NB-ARC,PF00931.23	'No_CC'	disease resistance protein RPM1-like [Phoenix dactylifera]
NBS-LRR	103713018	XP_008797995.2	NB-ARC,PF00931.23,LRR_8,PF13855.7,LRR_4,PF12799.8	'No_CC'	disease resistance protein RPS2-like [Phoenix dactylifera]
CC-NBS-LRR	103713855	XP_008799125.1	NB-ARC,PF00931.23,Rx_N,PF18052.2,LRR_8,PF13855.7,LRR_4,PF12799.8	'CC_region'	putative disease resistance protein RGA3 [Phoenix dactylifera]
NBS	103713888	XP_017699936.1	NB-ARC,PF00931.23	'No_CC'	putative disease resistance protein RGA4 [Phoenix dactylifera]
NBS-LRR	103715783	XP_017700348.1	NB-ARC,PF00931.23,Rx_N,PF18052.2,LRR_8,PF13855.7,LRR_4,PF12799.8	'No_CC'	putative disease resistance protein RGA3 [Phoenix dactylifera]
NBS-LRR	103715788	XP_017700351.1	NB-ARC,PF00931.23,Rx_N,PF18052.2,LRR_8,PF13855.7,LRR_4,PF12799.8	'No_CC'	putative disease resistance protein RGA3 [Phoenix dactylifera]
NBS-LRR	103715790	XP_026663769.1	NB-ARC,PF00931.23,Rx_N,PF18052.2,LRR_8,PF13855.7,LRR_4,PF12799.8	'No_CC'	putative disease resistance protein RGA3 [Phoenix dactylifera]
NBS-LRR	103716817	XP_008803211.3	NB-ARC,PF00931.23,LRR_8,PF13855.7,LRR_4,PF12799.8	'No_CC'	probable disease resistance protein At4g27220 [Phoenix dactylifera]
CC-NBS	103716841	XP_008803240.1	NB-ARC,PF00931.23,ATPase_2,PF01637.19,AAA_22,PF13401.7	'CC_region'	probable disease resistance protein At1g61310 [Phoenix dactylifera]
NBS	103716874	XP_008803284.1	NB-ARC,PF00931.23,Rx_N,PF18052.2	'No_CC'	disease resistance protein RGA2-like [Phoenix dactylifera]
CC-NBS-LRR	103717202	XP_008803720.2	NB-ARC,PF00931.23,Rx_N,PF18052.2,LRR_8,PF13855.7,LRR_4,PF12799.8,AAA_16,PF13191.7	'CC_region'	putative disease resistance protein RGA1 [Phoenix dactylifera]
NBS-LRR	103717245	XP_026664295.1	NB-ARC,PF00931.23,LRR_4,PF12799.8,Rx_N,PF18052.2,LRR_8,PF13855.7	'No_CC'	LOW QUALITY PROTEIN: putative disease resistance protein RGA3 [Phoenix dactylifera]
CC-NBS	103717455	XP_026664376.1	NB-ARC,PF00931.23,Rx_N,PF18052.2	'CC_region'	putative disease resistance protein RGA3 [Phoenix dactylifera]
NBS-LRR	103717611	XP_008804288.3	NB-ARC,PF00931.23,LRR_8,PF13855.7,LRR_4,PF12799.8,ATPase_2,PF01637.19	'No_CC'	disease resistance protein RPS2-like [Phoenix dactylifera]
CC-NBS-LRR	103717612	XP_026664448.1	NB-ARC,PF00931.23,LRR_8,PF13855.7,LRR_4,PF12799.8	'CC_region'	disease resistance protein RPS2-like [Phoenix dactylifera]
NBS	103717710	XP_026664071.1	NB-ARC,PF00931.23,Rx_N,PF18052.2	'No_CC'	putative disease resistance protein RGA3 [Phoenix dactylifera]
CC-NBS-LRR	103718074	XP_026664643.1	NB-ARC,PF00931.23,Rx_N,PF18052.2,LRR_4,PF12799.8	'CC_region'	putative disease resistance protein RGA3 [Phoenix dactylifera]
NBS	103718153	XP_026664668.1	NB-ARC,PF00931.23,Rx_N,PF18052.2	'No_CC'	putative disease resistance protein RGA3 [Phoenix dactylifera]
CC-NBS-LRR	103718154	XP_026664671.1	NB-ARC,PF00931.23,Rx_N,PF18052.2,LRR_4,PF12799.8	'CC_region'	disease resistance protein RGA2-like isoform X1 [Phoenix dactylifera]
CC-NBS-LRR	103718162	XP_008805073.1	NB-ARC,PF00931.23,Rx_N,PF18052.2,LRR_4,PF12799.8,LRR_8,PF13855.7	'CC_region'	putative disease resistance protein RGA4 isoform X1 [Phoenix dactylifera]
NBS-LRR	103718205	XP_026664699.1	NB-ARC,PF00931.23,Rx_N,PF18052.2,LRR_4,PF12799.8,LRR_8,PF13855.7	'No_CC'	putative disease resistance protein RGA3 [Phoenix dactylifera]
NBS-LRR	103718350	XP_008805355.1	NB-ARC,PF00931.23,Rx_N,PF18052.2,LRR_4,PF12799.8	'No_CC'	putative disease resistance protein RGA3 [Phoenix dactylifera]
CC-NBS	103718357	XP_008805363.1	NB-ARC,PF00931.23,Rx_N,PF18052.2	'CC_region'	putative disease resistance protein RGA3 [Phoenix dactylifera]
NBS	103718478	XP_008805549.1	NB-ARC,PF00931.23	'No_CC'	uncharacterized protein LOC103718478 [Phoenix dactylifera]
NBS-LRR	103718661	XP_026664049.1	NB-ARC,PF00931.23,Rx_N,PF18052.2,LRR_8,PF13855.7,LRR_4,PF12799.8,AAA_14,PF13173.7,DUF1931,PF09123.12,RPW8,PF05659.12	'No_CC'	uncharacterized protein LOC103718661 [Phoenix dactylifera]
NBS-LRR	103718688	XP_026664537.1	NB-ARC,PF00931.23,LRR_8,PF13855.7,LRR_4,PF12799.8	'No_CC'	putative disease resistance RPP13-like protein 1 isoform X1 [Phoenix dactylifera]
NBS-LRR	103718742	XP_008805916.2	NB-ARC,PF00931.23,LRR_4,PF12799.8,LRR_8,PF13855.7	'No_CC'	putative disease resistance RPP13-like protein 1 [Phoenix dactylifera]
NBS-LRR	103719382	XP_026665154.1	NB-ARC,PF00931.23,Rx_N,PF18052.2,LRR_4,PF12799.8,LRR_8,PF13855.7	'No_CC'	disease resistance protein RPM1-like [Phoenix dactylifera]
CC-NBS	103719545	XP_008807059.1	NB-ARC,PF00931.23,Rx_N,PF18052.2	'CC_region'	putative disease resistance protein RGA1 [Phoenix dactylifera]
NBS-LRR	103720076	XP_017701415.2	NB-ARC,PF00931.23,Rx_N,PF18052.2,LRR_8,PF13855.7,AAA_14,PF13173.7,AAA_16,PF13191.7,LRR_4,PF12799.8,AAA_22,PF13401.7,NACHT,PF05729.13	'No_CC'	LOW QUALITY PROTEIN: putative disease resistance protein RGA3 [Phoenix dactylifera]
NBS-LRR	103720349	XP_008808230.1	NB-ARC,PF00931.23,Rx_N,PF18052.2,LRR_4,PF12799.8,LRR_8,PF13855.7	'No_CC'	putative disease resistance protein RGA3 [Phoenix dactylifera]
CC-NBS-LRR	103720629	XP_008808655.1	NB-ARC,PF00931.23,Rx_N,PF18052.2,LRR_4,PF12799.8,LRR_8,PF13855.7	'CC_region'	disease resistance protein RGA2-like [Phoenix dactylifera]
NBS	103720698	XP_017701557.2	NB-ARC,PF00931.23,Rx_N,PF18052.2	'No_CC'	disease resistance protein RPM1-like [Phoenix dactylifera]
NBS	103720931	XP_008809126.1	NB-ARC,PF00931.23,Rx_N,PF18052.2	'No_CC'	disease resistance protein RGA2-like [Phoenix dactylifera]
NBS-LRR	103721030	XP_026665788.1	NB-ARC,PF00931.23,Rx_N,PF18052.2,LRR_8,PF13855.7,LRR_4,PF12799.8,TniB,PF05621.12,NACHT,PF05729.13	'No_CC'	putative disease resistance protein RGA3, partial [Phoenix dactylifera]
NBS-LRR	103721264	XP_026665888.1	NB-ARC,PF00931.23,Rx_N,PF18052.2,LRR_4,PF12799.8,AAA_16,PF13191.7	'No_CC'	disease resistance protein RPM1-like [Phoenix dactylifera]
CC-NBS-LRR	103721268	XP_008809627.1	NB-ARC,PF00931.23,Rx_N,PF18052.2,LRR_4,PF12799.8	'CC_region'	putative disease resistance RPP13-like protein 1 [Phoenix dactylifera]
CC-NBS	103721276	XP_008809639.1	NB-ARC,PF00931.23,Rx_N,PF18052.2,AAA_16,PF13191.7	'CC_region'	putative disease resistance protein RGA3 [Phoenix dactylifera]
CC-NBS-LRR	103721435	XP_008809859.1	NB-ARC,PF00931.23,Rx_N,PF18052.2,LRR_8,PF13855.7,LRR_4,PF12799.8	'CC_region'	putative disease resistance protein RGA1 [Phoenix dactylifera]
NBS-LRR	103721439	XP_026665969.1	NB-ARC,PF00931.23,LRR_8,PF13855.7,LRR_4,PF12799.8,Rx_N,PF18052.2	'No_CC'	putative disease resistance protein RGA4 [Phoenix dactylifera]
NBS	103721596	XP_026666022.1	NB-ARC,PF00931.23,Rx_N,PF18052.2	'No_CC'	putative disease resistance RPP13-like protein 3 [Phoenix dactylifera]
NBS-LRR	103721598	XP_008810087.2	NB-ARC,PF00931.23,Rx_N,PF18052.2,LRR_8,PF13855.7	'No_CC'	LOW QUALITY PROTEIN: putative disease resistance protein At1g50180 [Phoenix dactylifera]
NBS-LRR	103721751	XP_017701822.1	NB-ARC,PF00931.23,Rx_N,PF18052.2,LRR_4,PF12799.8,LRR_8,PF13855.7	'No_CC'	putative disease resistance protein RGA4 [Phoenix dactylifera]
CC-NBS-LRR	103721755	XP_017701823.1	NB-ARC,PF00931.23,Rx_N,PF18052.2,LRR_8,PF13855.7	'CC_region'	putative disease resistance protein RGA4 [Phoenix dactylifera]
NBS-LRR	103721782	XP_008810341.3	NB-ARC,PF00931.23,Rx_N,PF18052.2,LRR_4,PF12799.8	'No_CC'	putative disease resistance RPP13-like protein 1 [Phoenix dactylifera]
NBS	103721786	XP_008810346.1	NB-ARC,PF00931.23	'No_CC'	putative disease resistance protein RGA3 [Phoenix dactylifera]
NBS-LRR	103721830	XP_026666108.1	NB-ARC,PF00931.23,Rx_N,PF18052.2,LRR_4,PF12799.8	'No_CC'	disease resistance RPP8-like protein 3 [Phoenix dactylifera]
NBS-LRR	103722101	XP_008810763.2	NB-ARC,PF00931.23,Rx_N,PF18052.2,LRR_8,PF13855.7,LRR_4,PF12799.8	'No_CC'	disease resistance protein RGA2-like [Phoenix dactylifera]
NBS-LRR	103722207	XP_026666237.1	NB-ARC,PF00931.23,Rx_N,PF18052.2,LRR_4,PF12799.8,LRR_8,PF13855.7	'No_CC'	putative disease resistance protein RGA3, partial [Phoenix dactylifera]
NBS-LRR	103722675	XP_008811538.3	NB-ARC,PF00931.23,Rx_N,PF18052.2,LRR_4,PF12799.8	'No_CC'	putative disease resistance RPP13-like protein 3 [Phoenix dactylifera]
NBS-LRR	103723007	XP_008812009.2	NB-ARC,PF00931.23,LRR_4,PF12799.8,LRR_8,PF13855.7	'No_CC'	LOW QUALITY PROTEIN: putative disease resistance RPP13-like protein 1 [Phoenix dactylifera]
CC-NBS	103723010	XP_026655735.1	NB-ARC,PF00931.23,Rx_N,PF18052.2	'CC_region'	putative disease resistance RPP13-like protein 1 [Phoenix dactylifera]
NBS-LRR	103723730	XP_017702268.2	NB-ARC,PF00931.23,Rx_N,PF18052.2,LRR_8,PF13855.7,LRR_4,PF12799.8	'No_CC'	putative disease resistance RPP13-like protein 3 [Phoenix dactylifera]
CC-NBS-LRR	103723826	XP_008813101.1	NB-ARC,PF00931.23,Rx_N,PF18052.2,LRR_4,PF12799.8	'CC_region'	putative disease resistance protein RGA3 [Phoenix dactylifera]
NBS	103723896	XP_008813201.3	NB-ARC,PF00931.23,Rx_N,PF18052.2	'No_CC'	putative disease resistance protein RGA3 [Phoenix dactylifera]
NBS-LRR	103724010	XP_026656123.1	NB-ARC,PF00931.23,LRR_8,PF13855.7,LRR_4,PF12799.8	'No_CC'	probable disease resistance protein At1g61300 [Phoenix dactylifera]
NBS	103724013	XP_008813356.1	NB-ARC,PF00931.23	'No_CC'	probable disease resistance protein At5g45440 [Phoenix dactylifera]
NBS-LRR	103724014	XP_008813357.1	LRR_4,PF12799.8	'No_CC'	disease resistance RPP13-like protein 4 [Phoenix dactylifera]
NBS	103724198	XP_026656206.1	NB-ARC,PF00931.23,Rx_N,PF18052.2	'No_CC'	putative disease resistance protein RGA3 [Phoenix dactylifera]
NBS-LRR	108510660	XP_017700353.1	NB-ARC,PF00931.23,Rx_N,PF18052.2,LRR_4,PF12799.8,LRR_8,PF13855.7	'No_CC'	putative disease resistance protein RGA3 [Phoenix dactylifera]
NBS	108510669	XP_017695846.1	NB-ARC,PF00931.23	'No_CC'	disease resistance protein RGA2-like [Phoenix dactylifera]
NBS-LRR	108510766	XP_026657109.1	NB-ARC,PF00931.23,Rx_N,PF18052.2,LRR_8,PF13855.7,LRR_4,PF12799.8	'No_CC'	putative disease resistance protein RGA4 [Phoenix dactylifera]
NBS	108510792	XP_017696318.2	NB-ARC,PF00931.23,Rx_N,PF18052.2	'No_CC'	LOW QUALITY PROTEIN: disease resistance protein RPM1-like [Phoenix dactylifera]
NBS-LRR	108510807	XP_026657349.1	NB-ARC,PF00931.23,LRR_4,PF12799.8,LRR_8,PF13855.7	'No_CC'	putative disease resistance RPP13-like protein 1, partial [Phoenix dactylifera]
NBS-LRR	108510880	XP_026657635.1	LRR_4,PF12799.8,LRR_8,PF13855.7	'No_CC'	putative disease resistance RPP13-like protein 1 [Phoenix dactylifera]
NBS-LRR	108511758	XP_026665510.1	NB-ARC,PF00931.23,Rx_N,PF18052.2,LRR_8,PF13855.7,LRR_4,PF12799.8	'No_CC'	putative disease resistance protein RGA4 [Phoenix dactylifera]
NBS	108511827	XP_026666109.1	NB-ARC,PF00931.23,Rx_N,PF18052.2	'No_CC'	disease resistance protein RPP8-like [Phoenix dactylifera]
CC-NBS-LRR	113460961	XP_026662507.1	NB-ARC,PF00931.23,Rx_N,PF18052.2,LRR_8,PF13855.7,LRR_4,PF12799.8	'CC_region'	LOW QUALITY PROTEIN: putative disease resistance protein RGA3, partial [Phoenix dactylifera]
NBS	113461825	XP_026657667.1	NB-ARC,PF00931.23	'No_CC'	putative disease resistance protein RGA4 [Phoenix dactylifera]
NBS	113462021	XP_026657796.1	NB-ARC,PF00931.23,Rx_N,PF18052.2	'No_CC'	putative disease resistance protein RGA4, partial [Phoenix dactylifera]
CC-NBS	113462863	XP_026661254.1	NB-ARC,PF00931.23,Rx_N,PF18052.2	'CC_region'	disease resistance protein RGA2-like [Phoenix dactylifera]
NBS-LRR	113463294	XP_026663767.1	NB-ARC,PF00931.23,Rx_N,PF18052.2,LRR_4,PF12799.8,LRR_8,PF13855.7	'No_CC'	putative disease resistance protein RGA1 [Phoenix dactylifera]
NBS-LRR	113463746	XP_026666206.1	NB-ARC,PF00931.23,LRR_4,PF12799.8,LRR_8,PF13855.7	'No_CC'	putative disease resistance protein RGA3 [Phoenix dactylifera]

## Sheet: Oryza sativa
Class	Gene_id	protein_id	NBS_domain/ids	CC_domain_Predicted	Descript
NBS	Os01g0112800	Os01t0112800-00	NB-ARC,PF00931.23,Rx_N,PF18052.2,AAA_22,PF13401.7	No_CC'	Disease resistance protein domain containing protein.
NBS	Os01g0113150	Os01t0113150-00	NB-ARC,PF00931.23	No_CC'	Disease resistance protein domain containing protein.
NBS-LRR	Os01g0149350	Os01t0149350-00	NB-ARC,PF00931.23,Rx_N,PF18052.2,LRR_4,PF12799.8,LRR_8,PF13855.7	No_CC'	NB-ARC domain containing protein.
NBS-LRR	Os01g0149500	Os01t0149500-01	NB-ARC,PF00931.23,Rx_N,PF18052.2,LRR_4,PF12799.8,LRR_8,PF13855.7	No_CC'	NBS-LRR domain-containing protein, Rice blast disease resistance
NBS-LRR	Os01g0260500	Os01t0260500-01	NB-ARC,PF00931.23,LRR_8,PF13855.7,Rx_N,PF18052.2,LRR_4,PF12799.8	No_CC'	Hypothetical conserved gene.
NBS-LRR	Os01g0308300	Os01t0308300-00	NB-ARC,PF00931.23,Rx_N,PF18052.2,LRR_4,PF12799.8	No_CC'	NB-ARC domain containing protein.
NBS	Os01g0335700	Os01t0335700-01	NB-ARC,PF00931.23,Rx_N,PF18052.2,AAA_16,PF13191.7	No_CC'	NB-ARC domain containing protein.
NBS	Os01g0350300	Os01t0350300-00	NB-ARC,PF00931.23,AAA_16,PF13191.7	No_CC'	Disease resistance protein domain containing protein.
NBS	Os01g0358700	Os01t0358700-01	NB-ARC,PF00931.23,Rx_N,PF18052.2	No_CC'	Similar to Powdery mildew resistance protein PM3b.
NBS	Os01g0359400	Os01t0359400-01	NB-ARC,PF00931.23,Rx_N,PF18052.2	No_CC'	NB-ARC domain containing protein.
NBS-LRR	Os01g0359600	Os01t0359600-00	NB-ARC,PF00931.23,Rx_N,PF18052.2,LRR_4,PF12799.8	No_CC'	Disease resistance protein domain containing protein.
NBS-LRR	Os01g0359800	Os01t0359800-00	NB-ARC,PF00931.23,Rx_N,PF18052.2,LRR_4,PF12799.8	No_CC'	Similar to NB-ARC domain containing protein.
CC-NBS	Os01g0520600	Os01t0520600-01	NB-ARC,PF00931.23,Rx_N,PF18052.2	CC_region'	NB-ARC domain containing protein.
NBS-LRR	Os01g0536501	Os01t0536501-00	NB-ARC,PF00931.23,LRR_4,PF12799.8,LRR_8,PF13855.7	No_CC'	Disease resistance protein domain containing protein.
NBS	Os01g0547000	Os01t0547000-01	NB-ARC,PF00931.23,Rx_N,PF18052.2	No_CC'	Similar to LRR19.
NBS	Os01g0603100	Os01t0603100-01	NB-ARC,PF00931.23,Rx_N,PF18052.2,AAA_16,PF13191.7,AAA_22,PF13401.7	No_CC'	NB-ARC domain containing protein.
NBS	Os01g0720800	Os01t0720800-01	NB-ARC,PF00931.23	No_CC'	Hypothetical conserved gene.
NBS	Os01g0721200	Os01t0721200-00	NB-ARC,PF00931.23,Rx_N,PF18052.2	No_CC'	Similar to cDNA clone:J013002N02, full insert sequence.
NBS	Os01g0721300	Os01t0721300-00	Rx_N,PF18052.2,NB-ARC,PF00931.23	No_CC'	Similar to cDNA clone:J013002N02, full insert sequence.
TIR-NBS	Os01g0760400	Os01t0760400-01	TIR_2,PF13676.7,NB-ARC,PF00931.23	No_CC'	Toll-Interleukin receptor domain containing protein.
NBS-LRR	Os01g0781100	Os01t0781100-01	NB-ARC,PF00931.23,AAA_16,PF13191.7,Rx_N,PF18052.2,LRR_8,PF13855.7,LRR_4,PF12799.8	No_CC'	Similar to NBS-LRR protein (Fragment).
NBS-LRR	Os01g0781200	Os01t0781200-01	NB-ARC,PF00931.23,Rx_N,PF18052.2,LRR_4,PF12799.8	No_CC'	Similar to Rust resistance protein.
NBS	Os01g0781700	Os01t0781700-00	NB-ARC,PF00931.23,Rx_N,PF18052.2	No_CC'	Similar to Blast resistance protein Pi37.
NBS	Os01g0782100	Os01t0782100-01	NB-ARC,PF00931.23,Rx_N,PF18052.2	No_CC'	Protein with NBS (nucleotide-binding site) and LRR(leucine-rich repeat), Race-specific resistance to blast
CC-NBS-LRR	Os01g0788500	Os01t0788500-01	NB-ARC,PF00931.23,LRR_8,PF13855.7,LRR_4,PF12799.8	CC_region'	Disease resistance protein domain containing protein.
NBS	Os01g0798900	Os01t0798900-00	NB-ARC,PF00931.23	No_CC'	Similar to disease resistance protein RGA4.
NBS-LRR	Os01g0799100	Os01t0799100-01	NB-ARC,PF00931.23,LRR_8,PF13855.7,LRR_4,PF12799.8	No_CC'	NB-ARC domain containing protein.
CC-NBS-LRR	Os01g0937300	Os01t0937300-01	NB-ARC,PF00931.23,Rx_N,PF18052.2,LRR_8,PF13855.7,LRR_4,PF12799.8	CC_region'	NB-ARC domain containing protein.
NBS-LRR	Os01g0937400	Os01t0937400-02	LRR_4,PF12799.8,LRR_8,PF13855.7	No_CC'	Hypothetical conserved gene.
CC-NBS-LRR	Os01g0956800	Os01t0956800-00	NB-ARC,PF00931.23,LRR_8,PF13855.7,LRR_4,PF12799.8,ATPase_2,PF01637.19	CC_region'	Hypothetical conserved gene.
NBS	Os02g0118875	Os02t0118875-00	NB-ARC,PF00931.23	No_CC'	NB-ARC domain containing protein.
CC-NBS-LRR	Os02g0191000	Os02t0191000-00	NB-ARC,PF00931.23,Rx_N,PF18052.2,LRR_8,PF13855.7	CC_region'	NB-ARC domain containing protein.
CC-NBS	Os02g0199200	Os02t0199200-00	NB-ARC,PF00931.23,Rx_N,PF18052.2	CC_region'	Disease resistance protein domain containing protein.
NBS	Os02g0203500	Os02t0203500-01	NB-ARC,PF00931.23	No_CC'	NB (nucleotide-binding site)-containing protein with an ARM (armadillo) domain, Chloroplast degradation during leaf senescence
NBS	Os02g0261800	Os02t0261800-00	NB-ARC,PF00931.23,Rx_N,PF18052.2,AAA_16,PF13191.7	No_CC'	NB-ARC domain containing protein.
NBS	Os02g0262600	Os02t0262600-00	NB-ARC,PF00931.23	No_CC'	Disease resistance protein domain containing protein.
NBS	Os02g0262800	Os02t0262800-01	NB-ARC,PF00931.23,Rx_N,PF18052.2	No_CC'	Similar to NBS-LRR protein (Fragment).
NBS	Os02g0272900	Os02t0272900-01	NB-ARC,PF00931.23,Rx_N,PF18052.2	No_CC'	NB-ARC domain containing protein.
NBS	Os02g0281200	Os02t0281200-01	NB-ARC,PF00931.23,Rx_N,PF18052.2	No_CC'	Similar to NBS-LRR protein (Fragment).
NBS	Os02g0282000	Os02t0282000-01	NB-ARC,PF00931.23,Rx_N,PF18052.2	No_CC'	NB-ARC domain containing protein.
NBS	Os02g0282500	Os02t0282500-00	NB-ARC,PF00931.23,Rx_N,PF18052.2	No_CC'	Disease resistance protein domain containing protein.
NBS	Os02g0286850	Os02t0286850-00	NB-ARC,PF00931.23	No_CC'	Similar to Stripe rust resistance protein Yr10.
NBS	Os02g0300500	Os02t0300500-00	NB-ARC,PF00931.23,Rx_N,PF18052.2	No_CC'	Disease resistance protein domain containing protein.
NBS	Os02g0301800	Os02t0301800-02	NB-ARC,PF00931.23,Jacalin,PF01419.18,Rx_N,PF18052.2	No_CC'	NB-ARC domain containing protein.
CC-NBS-LRR	Os02g0456800	Os02t0456800-01	NB-ARC,PF00931.23,Rx_N,PF18052.2,LRR_4,PF12799.8	CC_region'	Similar to Pollen signalling protein with adenylyl cyclase activity (Fragment).
NBS	Os02g0475500	Os02t0475500-00	NB-ARC,PF00931.23	No_CC'	NB-ARC domain containing protein.
NBS-LRR	Os02g0504200	Os02t0504200-00	NB-ARC,PF00931.23,LRR_4,PF12799.8,Rx_N,PF18052.2,LRR_8,PF13855.7	No_CC'	NBS-LRR protein (Fragment).
NBS	Os02g0612200	Os02t0612200-01	NB-ARC,PF00931.23,Rx_N,PF18052.2	No_CC'	NB-ARC domain containing protein.
NBS	Os02g0627900	Os02t0627900-00	NB-ARC,PF00931.23,Rx_N,PF18052.2	No_CC'	Similar to cDNA clone:J013002N02, full insert sequence.
NBS-LRR	Os03g0254000	Os03t0254000-01	NB-ARC,PF00931.23,LRR_8,PF13855.7,LRR_4,PF12799.8	No_CC'	NB-ARC domain containing protein.
NBS-LRR	Os03g0324600	Os03t0324600-01	NB-ARC,PF00931.23,Rx_N,PF18052.2,LRR_4,PF12799.8,LRR_8,PF13855.7,AAA_16,PF13191.7,AAA_22,PF13401.7	No_CC'	NB-ARC domain containing protein.
NBS	Os03g0379801	Os03t0379801-00	NB-ARC,PF00931.23,AAA_22,PF13401.7	No_CC'	Similar to NB-ARC domain containing protein.
NBS	Os03g0422900	Os03t0422900-00	Rx_N,PF18052.2,NB-ARC,PF00931.23	No_CC'	Similar to NB-ARC domain containing protein, expressed.
NBS-LRR	Os03g0573500	Os03t0573500-00	NB-ARC,PF00931.23,LRR_4,PF12799.8,LRR_8,PF13855.7	No_CC'	Disease resistance protein domain containing protein.
NBS-LRR	Os03g0579200	Os03t0579200-00	NB-ARC,PF00931.23,Rx_N,PF18052.2,LRR_8,PF13855.7	No_CC'	Similar to NB-ARC domain containing protein.
NBS-LRR	Os03g0599000	Os03t0599000-01	NB-ARC,PF00931.23,LRR_4,PF12799.8,LRR_8,PF13855.7,NACHT,PF05729.13	No_CC'	NB-ARC domain containing protein.
NBS-LRR	Os03g0689400	Os03t0689400-01	NB-ARC,PF00931.23,LRR_8,PF13855.7,LRR_4,PF12799.8	No_CC'	Similar to NB-ARC domain containing protein, expressed.
NBS-LRR	Os03g0709200	Os03t0709200-01	NB-ARC,PF00931.23,Rx_N,PF18052.2,LRR_4,PF12799.8	No_CC'	NB-ARC domain containing protein.
NBS-LRR	Os03g0848700	Os03t0848700-01	NB-ARC,PF00931.23,Rx_N,PF18052.2,LRR_4,PF12799.8,LRR_8,PF13855.7	No_CC'	Coiled-coil, nucleotide-binding, and leucine-rich repeat (CC-NB-LRR) protein, Resistance to brown planthopper, (Nipponbare: BPH-susceptible)
NBS-LRR	Os03g0849500	Os03t0849500-00	NB-ARC,PF00931.23,Rx_N,PF18052.2,LRR_8,PF13855.7	No_CC'	Similar to BPH14-1.
NBS	Os04g0111100	Os04t0111100-00	NB-ARC,PF00931.23	No_CC'	Similar to H0215A08.1 protein.
NBS-LRR	Os04g0111900	Os04t0111900-01	NB-ARC,PF00931.23,LRR_4,PF12799.8	No_CC'	Similar to Resistance gene analog PIC22 (Fragment).
CC-NBS	Os04g0112100	Os04t0112100-01	NB-ARC,PF00931.23,AAA_16,PF13191.7,Rx_N,PF18052.2	CC_region'	NB-ARC domain containing protein.
CC-NBS	Os04g0118800	Os04t0118800-00	NB-ARC,PF00931.23,Rx_N,PF18052.2	CC_region'	NB-ARC domain containing protein.
NBS	Os04g0193950	Os04t0193950-00	NB-ARC,PF00931.23	No_CC'	Disease resistance protein domain containing protein.
NBS-LRR	Os04g0219600	Os04t0219600-01	NB-ARC,PF00931.23,Rx_N,PF18052.2,LRR_8,PF13855.7	No_CC'	Similar to NBS-LRR protein (Fragment).
NBS	Os04g0375300	Os04t0375300-00	NB-ARC,PF00931.23,Rx_N,PF18052.2	No_CC'	Similar to NBS-LRR protein (Fragment).
NBS-LRR	Os04g0378575	Os04t0378575-00	NB-ARC,PF00931.23,Rx_N,PF18052.2,LRR_4,PF12799.8	No_CC'	Similar to NBS-LRR protein (Fragment).
NBS-LRR	Os04g0470500	Os04t0470500-00	NB-ARC,PF00931.23,LRR_8,PF13855.7	No_CC'	NB-ARC domain containing protein.
CC-NBS	Os04g0512900	Os04t0512900-01	NB-ARC,PF00931.23,Rx_N,PF18052.2	CC_region'	NB-ARC domain containing protein.
NBS	Os04g0514600	Os04t0514600-00	NB-ARC,PF00931.23,AAA_16,PF13191.7,ATPase_2,PF01637.19	No_CC'	Similar to NBS-LRR type disease resistance protein O2 (Fragment).
NBS	Os04g0621500	Os04t0621500-00	NB-ARC,PF00931.23,AAA_16,PF13191.7	No_CC'	Disease resistance protein domain containing protein.
NBS	Os04g0626450	Os04t0626450-01	NB-ARC,PF00931.23	No_CC'	NB-ARC domain containing protein.
NBS	Os05g0216950	Os05t0216950-00	NB-ARC,PF00931.23	No_CC'	NB-ARC domain containing protein.
NBS	Os05g0240200	Os05t0240200-03	NB-ARC,PF00931.23,Rx_N,PF18052.2	No_CC'	Similar to NB-ARC domain containing protein, expressed.
CC-NBS-LRR	Os05g0250700	Os05t0250700-00	NB-ARC,PF00931.23,Rx_N,PF18052.2,LRR_8,PF13855.7,LRR_4,PF12799.8	CC_region'	Similar to NB-ARC domain containing protein.
NBS	Os05g0365300	Os05t0365300-01	NB-ARC,PF00931.23,Rx_N,PF18052.2,AAA_16,PF13191.7,NACHT,PF05729.13	No_CC'	Nucleotide-binding site leucine-rich repeat (NBS-LRR) protein, Bacterial blight resistance
NBS-LRR	Os05g0380300	Os05t0380300-01	NB-ARC,PF00931.23,Rx_N,PF18052.2,LRR_8,PF13855.7,LRR_4,PF12799.8	No_CC'	Similar to NBS-LRR protein (Fragment).
NBS	Os05g0414200	Os05t0414200-01	NB-ARC,PF00931.23,AAA_22,PF13401.7	No_CC'	NB-ARC domain containing protein.
NBS	Os05g0414300	Os05t0414300-01	NB-ARC,PF00931.23,AAA_16,PF13191.7	No_CC'	NB-ARC domain containing protein.
NBS	Os05g0479700	Os05t0479700-00	NB-ARC,PF00931.23	No_CC'	NB-ARC domain containing protein.
NBS	Os05g0479800	Os05t0479800-01	NB-ARC,PF00931.23,AAA_22,PF13401.7	No_CC'	Similar to NB-ARC domain containing protein, expressed.
CC-NBS-LRR	Os05g0492200	Os05t0492200-01	NB-ARC,PF00931.23,Rx_N,PF18052.2,LRR_8,PF13855.7,LRR_4,PF12799.8	CC_region'	NB-ARC domain containing protein.
NBS-LRR	Os05g0492600	Os05t0492600-00	NB-ARC,PF00931.23,Rx_N,PF18052.2,LRR_8,PF13855.7	No_CC'	Similar to NBS-LRR type resistance protein (Fragment).
NBS	Os05g0533400	Os05t0533400-01	NB-ARC,PF00931.23,Rx_N,PF18052.2	No_CC'	NB-ARC domain containing protein.
NBS	Os06g0125000	Os06t0125000-00	NB-ARC,PF00931.23,Rx_N,PF18052.2	No_CC'	Similar to NBS-LRR disease resistance protein homologue.
NBS-LRR	Os06g0146100	Os06t0146100-01	NB-ARC,PF00931.23,Rx_N,PF18052.2,LRR_4,PF12799.8	No_CC'	NB-ARC domain containing protein.
NBS	Os06g0158300	Os06t0158300-01	NB-ARC,PF00931.23,Rx_N,PF18052.2	No_CC'	NB-ARC domain containing protein.
NBS	Os06g0158400	Os06t0158400-01	Rx_N,PF18052.2,NB-ARC,PF00931.23	No_CC'	Hypothetical conserved gene.
NBS	Os06g0267900	Os06t0267900-01	NB-ARC,PF00931.23	No_CC'	NB-ARC domain containing protein.
CC-NBS-LRR	Os06g0268500	Os06t0268500-00	NB-ARC,PF00931.23,Rx_N,PF18052.2,LRR_8,PF13855.7,LRR_4,PF12799.8	CC_region'	Similar to OSIGBa0139J17.1 protein.
NBS	Os06g0279900	Os06t0279900-00	NB-ARC,PF00931.23,AAA_22,PF13401.7	No_CC'	Similar to NB-ARC domain containing protein, expressed.
NBS	Os06g0286500	Os06t0286500-01	NB-ARC,PF00931.23,Rx_N,PF18052.2	No_CC'	Similar to NBS-LRR disease resistance protein homologue.
NBS	Os06g0286700	Os06t0286700-00	NB-ARC,PF00931.23	No_CC'	Similar to Piz-t.
NBS	Os06g0287000	Os06t0287000-00	NB-ARC,PF00931.23	No_CC'	Similar to NBS-LRR type R protein, Nbs4-Pi.
NBS	Os06g0287200	Os06t0287200-00	NB-ARC,PF00931.23	No_CC'	Similar to NBS-LRR type R protein Nbs7-75.
NBS	Os06g0287500	Os06t0287500-02	NB-ARC,PF00931.23,Rx_N,PF18052.2,AAA_16,PF13191.7	No_CC'	Similar to NBS-LRR type R protein Nbs7-75.
NBS	Os06g0287700	Os06t0287700-01	Rx_N,PF18052.2,NB-ARC,PF00931.23,AAA_16,PF13191.7	No_CC'	Similar to NBS-LRR disease resistance protein homologue (Fragment).
NBS	Os06g0330100	Os06t0330100-01	NB-ARC,PF00931.23,Rx_N,PF18052.2	No_CC'	Blast resistance protein, Pseudogene due to premature stop mutation (most japonica varieties), Blast resistance
NBS	Os06g0524900	Os06t0524900-01	NB-ARC,PF00931.23,Rx_N,PF18052.2	No_CC'	NB-ARC domain containing protein.
NBS	Os06g0594200	Os06t0594200-01	NB-ARC,PF00931.23	No_CC'	Disease resistance protein domain containing protein.
NBS	Os06g0619000	Os06t0619000-01	NB-ARC,PF00931.23,Rx_N,PF18052.2	No_CC'	NB-ARC domain containing protein.
NBS-LRR	Os06g0667900	Os06t0667900-00	NB-ARC,PF00931.23,Rx_N,PF18052.2,LRR_4,PF12799.8	No_CC'	Disease resistance protein domain containing protein.
NBS	Os06g0693100	Os06t0693100-01	NB-ARC,PF00931.23,Rx_N,PF18052.2,AAA_16,PF13191.7	No_CC'	NB-ARC domain containing protein.
CC-NBS	Os06g0698812	Os06t0698812-00	NB-ARC,PF00931.23,Rx_N,PF18052.2	CC_region'	Disease resistance protein domain containing protein.
NBS-LRR	Os06g0703200	Os06t0703200-01	NB-ARC,PF00931.23,LRR_4,PF12799.8	No_CC'	Disease resistance protein domain containing protein.
NBS	Os06g0707700	Os06t0707700-01	NB-ARC,PF00931.23,Rx_N,PF18052.2,NACHT,PF05729.13	No_CC'	NB-ARC domain containing protein.
NBS	Os06g0707733	Os06t0707733-00	NB-ARC,PF00931.23,Rx_N,PF18052.2	No_CC'	Disease resistance protein domain containing protein.
NBS	Os06g0707800	Os06t0707800-03	NB-ARC,PF00931.23,Rx_N,PF18052.2,AAA_16,PF13191.7,NACHT,PF05729.13	No_CC'	Disease resistance protein domain containing protein.
NBS	Os07g0105900	Os07t0105900-01	NB-ARC,PF00931.23	No_CC'	NB-ARC domain containing protein.
CC-NBS	Os07g0116800	Os07t0116800-00	NB-ARC,PF00931.23,Rx_N,PF18052.2	CC_region'	Hypothetical conserved gene.
CC-NBS	Os07g0117300	Os07t0117300-00	NB-ARC,PF00931.23,Rx_N,PF18052.2	CC_region'	NB-ARC domain containing protein.
NBS	Os07g0117800	Os07t0117800-00	NB-ARC,PF00931.23	No_CC'	Hypothetical conserved gene.
NBS	Os07g0117900	Os07t0117900-00	NB-ARC,PF00931.23,Rx_N,PF18052.2	No_CC'	NB-ARC domain containing protein.
NBS	Os07g0118000	Os07t0118000-00	NB-ARC,PF00931.23,Rx_N,PF18052.2	No_CC'	Hypothetical conserved gene.
NBS-LRR	Os07g0141700	Os07t0141700-00	NB-ARC,PF00931.23,LRR_8,PF13855.7,LRR_4,PF12799.8	No_CC'	NB-ARC domain containing protein.
NBS	Os07g0141900	Os07t0141900-00	NB-ARC,PF00931.23,Rx_N,PF18052.2,NACHT,PF05729.13	No_CC'	Similar to OSIGBa0148A10.13 protein.
NBS-LRR	Os07g0186500	Os07t0186500-01	NB-ARC,PF00931.23,Rx_N,PF18052.2,LRR_8,PF13855.7,LRR_4,PF12799.8,AAA_22,PF13401.7	No_CC'	NB-ARC domain containing protein.
NBS	Os07g0197300	Os07t0197300-00	NB-ARC,PF00931.23,Rx_N,PF18052.2,AAA_14,PF13173.7	No_CC'	Disease resistance protein domain containing protein.
NBS	Os07g0197500	Os07t0197500-00	NB-ARC,PF00931.23,Rx_N,PF18052.2	No_CC'	Disease resistance protein domain containing protein.
NBS	Os07g0273600	Os07t0273600-01	NB-ARC,PF00931.23,Rx_N,PF18052.2	No_CC'	Disease resistance protein domain containing protein.
NBS-LRR	Os07g0273700	Os07t0273700-00	NB-ARC,PF00931.23,B3,PF02362.22,LRR_8,PF13855.7,LRR_4,PF12799.8	No_CC'	Disease resistance protein domain containing protein.
NBS	Os07g0273900	Os07t0273900-01	NB-ARC,PF00931.23,Rx_N,PF18052.2,AAA_16,PF13191.7	No_CC'	Disease resistance protein domain containing protein.
NBS	Os07g0294100	Os07t0294100-00	Rx_N,PF18052.2,NB-ARC,PF00931.23	No_CC'	Similar to NB-ARC domain containing protein.
NBS-LRR	Os07g0481300	Os07t0481300-01	NB-ARC,PF00931.23,LRR_8,PF13855.7,Rx_N,PF18052.2,LRR_4,PF12799.8	No_CC'	Hypothetical conserved gene.
CC-NBS-LRR	Os07g0481400	Os07t0481400-01	NB-ARC,PF00931.23,Rx_N,PF18052.2,LRR_4,PF12799.8,LRR_8,PF13855.7	CC_region'	NB-ARC domain containing protein.
NBS-LRR	Os07g0521500	Os07t0521500-01	NB-ARC,PF00931.23,Rx_N,PF18052.2,LRR_4,PF12799.8,LRR_8,PF13855.7	No_CC'	NB-ARC domain containing protein.
NBS-LRR	Os07g0521600	Os07t0521600-01	NB-ARC,PF00931.23,LRR_4,PF12799.8	No_CC'	Similar to NBS-LRR protein (Fragment).
NBS	Os07g0521800	Os07t0521800-01	NB-ARC,PF00931.23,Rx_N,PF18052.2,AAA_22,PF13401.7,AAA_16,PF13191.7	No_CC'	NB-ARC domain containing protein.
NBS-LRR	Os07g0599100	Os07t0599100-00	NB-ARC,PF00931.23,Rx_N,PF18052.2,LRR_4,PF12799.8,LRR_8,PF13855.7	No_CC'	Hypothetical conserved gene.
NBS	Os08g0170100	Os08t0170100-01	Rx_N,PF18052.2,NB-ARC,PF00931.23	No_CC'	NB-ARC domain containing protein.
NBS	Os08g0170200	Os08t0170200-00	NB-ARC,PF00931.23,AAA_22,PF13401.7	No_CC'	Disease resistance protein domain containing protein.
NBS	Os08g0170700	Os08t0170700-00	NB-ARC,PF00931.23,Rx_N,PF18052.2,AAA_22,PF13401.7	No_CC'	Disease resistance protein domain containing protein.
NBS-LRR	Os08g0174800	Os08t0174800-01	NB-ARC,PF00931.23,LRR_8,PF13855.7	No_CC'	Similar to Benzothiadiazole-induced somatic embryogenesis receptor kinase 1.
CC-NBS	Os08g0190300	Os08t0190300-00	NB-ARC,PF00931.23,Rx_N,PF18052.2,AAA_16,PF13191.7	CC_region'	Disease resistance protein domain containing protein.
NBS	Os08g0193700	Os08t0193700-00	NB-ARC,PF00931.23	No_CC'	Similar to NBS-LRR disease resistance protein homologue (Fragment).
NBS	Os08g0202400	Os08t0202400-01	NB-ARC,PF00931.23,Rx_N,PF18052.2	No_CC'	Disease resistance protein domain containing protein.
NBS	Os08g0205100	Os08t0205100-01	NB-ARC,PF00931.23	No_CC'	Disease resistance protein domain containing protein.
NBS	Os08g0205150	Os08t0205150-01	NB-ARC,PF00931.23,Rx_N,PF18052.2	No_CC'	NB-ARC domain containing protein.
NBS-LRR	Os08g0224000	Os08t0224000-01	NB-ARC,PF00931.23,Rx_N,PF18052.2,LRR_4,PF12799.8,LRR_8,PF13855.7	No_CC'	NB-ARC domain containing protein.
NBS	Os08g0235600	Os08t0235600-00	NB-ARC,PF00931.23,Rx_N,PF18052.2	No_CC'	Hypothetical conserved gene.
NBS	Os08g0246100	Os08t0246100-01	NB-ARC,PF00931.23,Rx_N,PF18052.2,AAA_16,PF13191.7,AAA_22,PF13401.7	No_CC'	Hypothetical conserved gene.
NBS	Os08g0246300	Os08t0246300-01	NB-ARC,PF00931.23,Rx_N,PF18052.2,AAA_22,PF13401.7	No_CC'	NB-ARC domain containing protein.
NBS	Os08g0260800	Os08t0260800-00	NB-ARC,PF00931.23,Rx_N,PF18052.2	No_CC'	Similar to NB-ARC domain containing protein.
NBS	Os08g0261000	Os08t0261000-01	NB-ARC,PF00931.23,Rx_N,PF18052.2	No_CC'	NB-ARC domain containing protein.
NBS-LRR	Os08g0265300	Os08t0265300-00	NB-ARC,PF00931.23,LRR_4,PF12799.8,LRR_8,PF13855.7,LRR_1,PF00560.34,AAA_16,PF13191.7	No_CC'	Disease resistance protein domain containing protein.
NBS	Os08g0293300	Os08t0293300-01	NB-ARC,PF00931.23,Rx_N,PF18052.2,AAA_16,PF13191.7	No_CC'	NB-ARC domain containing protein.
NBS-LRR	Os08g0296600	Os08t0296600-01	NB-ARC,PF00931.23,LRR_4,PF12799.8	No_CC'	NB-ARC domain containing protein.
CC-NBS-LRR	Os08g0296700	Os08t0296700-01	NB-ARC,PF00931.23,LRR_4,PF12799.8,NACHT,PF05729.13,AAA_22,PF13401.7	CC_region'	NB-ARC domain containing protein.
NBS	Os08g0332600	Os08t0332600-00	NB-ARC,PF00931.23,Rx_N,PF18052.2	No_CC'	Disease resistance protein domain containing protein.
NBS	Os08g0372700	Os08t0372700-00	NB-ARC,PF00931.23,Rx_N,PF18052.2	No_CC'	Hypothetical conserved gene.
NBS	Os08g0373000	Os08t0373000-00	NB-ARC,PF00931.23,Rx_N,PF18052.2	No_CC'	Hypothetical conserved gene.
NBS	Os08g0387700	Os08t0387700-01	NB-ARC,PF00931.23,Rx_N,PF18052.2,AAA_14,PF13173.7	No_CC'	NB-ARC domain containing protein.
NBS-LRR	Os08g0388300	Os08t0388300-01	NB-ARC,PF00931.23,Rx_N,PF18052.2,LRR_4,PF12799.8,LRR_8,PF13855.7	No_CC'	NB-ARC domain containing protein.
NBS	Os08g0396700	Os08t0396700-01	NB-ARC,PF00931.23	No_CC'	NB-ARC domain containing protein.
NBS	Os08g0412100	Os08t0412100-01	NB-ARC,PF00931.23,Rx_N,PF18052.2,AAA_14,PF13173.7	No_CC'	NB-ARC domain containing protein.
NBS-LRR	Os08g0424700	Os08t0424700-00	NB-ARC,PF00931.23,LRR_4,PF12799.8,LRR_8,PF13855.7	No_CC'	NB-ARC domain containing protein.
CC-NBS	Os08g0539400	Os08t0539400-01	NB-ARC,PF00931.23,Rx_N,PF18052.2	CC_region'	Similar to Resistance protein T10rga2-1A.
NBS	Os08g0539700	Os08t0539700-01	NB-ARC,PF00931.23,Rx_N,PF18052.2,AAA_16,PF13191.7	No_CC'	NB-ARC domain containing protein.
NBS-LRR	Os08g0539900	Os08t0539900-00	NB-ARC,PF00931.23,Rx_N,PF18052.2,LRR_4,PF12799.8	No_CC'	NB-ARC domain containing protein.
NBS	Os08g0542200	Os08t0542200-01	NB-ARC,PF00931.23,Rx_N,PF18052.2	No_CC'	Similar to Resistance gene analog PIC25 (Fragment).
CC-NBS	Os08g0543050	Os08t0543050-00	NB-ARC,PF00931.23,Rx_N,PF18052.2	CC_region'	Similar to NBS2-RDG2A.
NBS-LRR	Os08g0543100	Os08t0543100-00	NB-ARC,PF00931.23,Rx_N,PF18052.2,LRR_4,PF12799.8,NACHT,PF05729.13	No_CC'	Similar to NBS-LRR type resistance protein (Fragment).
CC-NBS	Os08g0543500	Os08t0543500-01	NB-ARC,PF00931.23,Rx_N,PF18052.2	CC_region'	Similar to NBS-LRR type resistance protein (Fragment).
NBS-LRR	Os09g0270700	Os09t0270700-00	NB-ARC,PF00931.23,LRR_8,PF13855.7	No_CC'	Disease resistance protein domain containing protein.
CC-NBS-LRR	Os09g0272900	Os09t0272900-01	NB-ARC,PF00931.23,LRR_8,PF13855.7,LRR_4,PF12799.8	CC_region'	Disease resistance protein domain containing protein.
NBS-LRR	Os09g0311600	Os09t0311600-01	NB-ARC,PF00931.23,LRR_4,PF12799.8,LRR_8,PF13855.7	No_CC'	Similar to NBS-LRR type resistance protein (Fragment).
CC-NBS-LRR	Os09g0313500	Os09t0313500-01	NB-ARC,PF00931.23,LRR_8,PF13855.7,LRR_4,PF12799.8,AAA_22,PF13401.7	CC_region'	NB-ARC domain containing protein.
NBS-LRR	Os09g0313600	Os09t0313600-00	NB-ARC,PF00931.23,LRR_4,PF12799.8,LRR_8,PF13855.7	No_CC'	Disease resistance protein domain containing protein.
NBS	Os09g0314200	Os09t0314200-00	NB-ARC,PF00931.23,Rx_N,PF18052.2	No_CC'	Disease resistance protein domain containing protein.
NBS	Os09g0322800	Os09t0322800-00	NB-ARC,PF00931.23,AAA_22,PF13401.7,ATPase_2,PF01637.19,AAA_16,PF13191.7,NACHT,PF05729.13,AAA_30,PF13604.7,Bac_DnaA,PF00308.19,KAP_NTPase,PF07693.15	No_CC'	Disease resistance protein domain containing protein.
NBS	Os09g0327600	Os09t0327600-01	NB-ARC,PF00931.23,Rx_N,PF18052.2,AAA,PF00004.30	No_CC'	Similar to Pi5-1.
NBS	Os09g0327800	Os09t0327800-00	NB-ARC,PF00931.23,Rx_N,PF18052.2,AAA_16,PF13191.7,NACHT,PF05729.13	No_CC'	Similar to Pi5-2.
NBS	Os09g0357400	Os09t0357400-00	NB-ARC,PF00931.23,AAA_22,PF13401.7	No_CC'	Disease resistance protein domain containing protein.
NBS	Os09g0365000	Os09t0365000-00	NB-ARC,PF00931.23,VQ,PF05678.15	No_CC'	Disease resistance protein domain containing protein.
NBS	Os09g0365300	Os09t0365300-01	NB-ARC,PF00931.23	No_CC'	NB-ARC domain containing protein.
NBS	Os09g0479500	Os09t0479500-01	NB-ARC,PF00931.23,Rx_N,PF18052.2	No_CC'	NB-ARC domain containing protein.
NBS	Os09g0481600	Os09t0481600-01	NB-ARC,PF00931.23	No_CC'	Similar to tir-nbs resistance protein.
NBS	Os09g0517100	Os09t0517100-02	NB-ARC,PF00931.23,Rx_N,PF18052.2	No_CC'	Hypothetical conserved gene.
NBS-LRR	Os09g0517200	Os09t0517200-00	NB-ARC,PF00931.23,Rx_N,PF18052.2,LRR_8,PF13855.7,LRR_4,PF12799.8	No_CC'	Hypothetical conserved gene.
CC-NBS	Os10g0124400	Os10t0124400-00	Rx_N,PF18052.2,NB-ARC,PF00931.23	CC_region'	Hypothetical conserved gene.
CC-NBS	Os10g0125700	Os10t0125700-00	NB-ARC,PF00931.23	CC_region'	NB-ARC domain containing protein.
NBS-LRR	Os10g0130600	Os10t0130600-00	NB-ARC,PF00931.23,Rx_N,PF18052.2,LRR_4,PF12799.8,LRR_8,PF13855.7	No_CC'	Hypothetical conserved gene.
NBS-LRR	Os10g0131100	Os10t0131100-00	NB-ARC,PF00931.23,Rx_N,PF18052.2,LRR_4,PF12799.8	No_CC'	Similar to NB-ARC domain containing protein.
NBS	Os10g0131800	Os10t0131800-01	NB-ARC,PF00931.23,Rx_N,PF18052.2	No_CC'	Similar to NBS-LRR class disease resistance protein.
NBS	Os10g0132500	Os10t0132500-01	Rx_N,PF18052.2,NB-ARC,PF00931.23	No_CC'	Hypothetical conserved gene.
CC-NBS	Os10g0132700	Os10t0132700-01	Rx_N,PF18052.2,NB-ARC,PF00931.23	CC_region'	Similar to NB-ARC domain containing protein, expressed.
NBS	Os10g0135100	Os10t0135100-00	NB-ARC,PF00931.23,Rx_N,PF18052.2	No_CC'	NB-ARC domain containing protein.
NBS	Os10g0136100	Os10t0136100-02	NB-ARC,PF00931.23,Rx_N,PF18052.2	No_CC'	Similar to NB-ARC domain containing protein, expressed.
NBS-LRR	Os10g0161400	Os10t0161400-01	NB-ARC,PF00931.23,Rx_N,PF18052.2,LRR_8,PF13855.7	No_CC'	NB-ARC domain containing protein.
NBS	Os10g0162832	Os10t0162832-01	NB-ARC,PF00931.23,Rx_N,PF18052.2	No_CC'	Similar to LRR14.
NBS	Os10g0162854	Os10t0162854-01	NB-ARC,PF00931.23,Rx_N,PF18052.2	No_CC'	Similar to OSIGBa0106P14.3 protein.
NBS	Os10g0163040	Os10t0163040-01	NB-ARC,PF00931.23,Rx_N,PF18052.2	No_CC'	Similar to Blast resistance protein.
NBS	Os10g0183000	Os10t0183000-01	NB-ARC,PF00931.23,Rx_N,PF18052.2	No_CC'	NB-LRR protein, Immune response
NBS-LRR	Os10g0358200	Os10t0358200-00	NB-ARC,PF00931.23,Rx_N,PF18052.2,LRR_8,PF13855.7	No_CC'	Similar to NB-ARC domain containing protein.
NBS	Os10g0370100	Os10t0370100-01	NB-ARC,PF00931.23,Rx_N,PF18052.2	No_CC'	NB-ARC domain containing protein.
NBS	Os10g0370400	Os10t0370400-01	Rx_N,PF18052.2,NB-ARC,PF00931.23	No_CC'	Similar to NB-ARC domain containing protein.
NBS	Os10g0394400	Os10t0394400-01	NB-ARC,PF00931.23,Rx_N,PF18052.2,NACHT,PF05729.13	No_CC'	Disease resistance protein domain containing protein.
NBS	Os10g0568600	Os10t0568600-00	NB-ARC,PF00931.23	No_CC'	Disease resistance protein domain containing protein.
NBS	Os11g0130900	Os11t0130900-00	NB-ARC,PF00931.23,Rx_N,PF18052.2	No_CC'	Similar to NB-ARC domain containing protein, expressed.
NBS	Os11g0161000	Os11t0161000-01	NB-ARC,PF00931.23	No_CC'	NB-ARC domain containing protein.
NBS	Os11g0207400	Os11t0207400-01	NB-ARC,PF00931.23,Rx_N,PF18052.2	No_CC'	NB-ARC domain containing protein.
NBS-LRR	Os11g0211300	Os11t0211300-01	NB-ARC,PF00931.23,LRR_8,PF13855.7,LRR_4,PF12799.8,Rx_N,PF18052.2,LRR_1,PF00560.34	No_CC'	Similar to NBS-LRR disease resistance protein homologue (Fragment).
NBS-LRR	Os11g0212000	Os11t0212000-00	NB-ARC,PF00931.23,LRR_8,PF13855.7,LRR_4,PF12799.8,LRR_1,PF00560.34	No_CC'	Similar to Leucine Rich Repeat family protein, expressed.
NBS	Os11g0213800	Os11t0213800-01	NB-ARC,PF00931.23,Rx_N,PF18052.2,AAA_22,PF13401.7	No_CC'	Similar to NBS-LRR disease resistance protein homologue (Fragment).
NBS	Os11g0222900	Os11t0222900-01	NB-ARC,PF00931.23,Rx_N,PF18052.2,AAA_16,PF13191.7	No_CC'	NB-ARC domain containing protein.
NBS	Os11g0223201	Os11t0223201-01	NB-ARC,PF00931.23	No_CC'	Similar to NB-ARC domain containing protein, expressed.
NBS-LRR	Os11g0224900	Os11t0224900-00	NB-ARC,PF00931.23,Rx_N,PF18052.2,LRR_4,PF12799.8,AAA_16,PF13191.7,LRR_8,PF13855.7	No_CC'	Similar to NBS-LRR protein (Fragment).
CC-NBS	Os11g0225100	Os11t0225100-01	NB-ARC,PF00931.23,Rx_N,PF18052.2,AAA_22,PF13401.7	CC_region'	Nucleotide binding site-leucine rich repeats (NBS-LRRs) protein, Resistance to the blast fungus, (Nippponbare: susceptible to the blast fungus carrying the AVR-Pia)
NBS-LRR	Os11g0225300	Os11t0225300-01	NB-ARC,PF00931.23,Rx_N,PF18052.2,LRR_4,PF12799.8,LRR_8,PF13855.7,AAA_22,PF13401.7	No_CC'	Nucleotide binding site-leucine rich repeats (NBS-LRRs) protein, Resistance protein, Resistance to the blast fungus, (Nippponbare: susceptible to the blast fungus carrying the AVR-Pia)
NBS	Os11g0226933	Os11t0226933-01	NB-ARC,PF00931.23	No_CC'	NB-ARC domain containing protein.
NBS-LRR	Os11g0227200	Os11t0227200-01	NB-ARC,PF00931.23,Rx_N,PF18052.2,LRR_8,PF13855.7	No_CC'	Similar to NBS-LRR disease resistance protein homologue.
NBS-LRR	Os11g0227700	Os11t0227700-01	NB-ARC,PF00931.23,LRR_8,PF13855.7	No_CC'	Similar to Non-TIR-NBS-LRR type resistance protein.
NBS	Os11g0227800	Os11t0227800-01	NB-ARC,PF00931.23,Rx_N,PF18052.2	No_CC'	NB-ARC domain containing protein.
NBS	Os11g0229300	Os11t0229300-00	Rx_N,PF18052.2	No_CC'	Similar to NBS-LRR-like protein.
NBS	Os11g0229400	Os11t0229400-01	NB-ARC,PF00931.23,Rx_N,PF18052.2	No_CC'	Similar to NBS-LRR protein (Fragment).
CC-NBS	Os11g0229500	Os11t0229500-01	NB-ARC,PF00931.23,Rx_N,PF18052.2	CC_region'	Similar to NBS-LRR protein (Fragment).
NBS	Os11g0237600	Os11t0237600-01	NB-ARC,PF00931.23,Rx_N,PF18052.2	No_CC'	Hypothetical conserved gene.
CC-NBS-LRR	Os11g0237900	Os11t0237900-00	NB-ARC,PF00931.23,Rx_N,PF18052.2,LRR_8,PF13855.7,AAA_22,PF13401.7	CC_region'	Similar to NB-ARC domain containing protein.
CC-NBS	Os11g0238000	Os11t0238000-00	NB-ARC,PF00931.23,Rx_N,PF18052.2	CC_region'	Similar to NB-ARC domain containing protein.
NBS	Os11g0238700	Os11t0238700-00	NB-ARC,PF00931.23	No_CC'	Similar to NB-ARC domain containing protein.
CC-NBS	Os11g0249000	Os11t0249000-01	NB-ARC,PF00931.23,Rx_N,PF18052.2	CC_region'	NB-ARC domain containing protein.
NBS	Os11g0258500	Os11t0258500-00	NB-ARC,PF00931.23,Rx_N,PF18052.2	No_CC'	Disease resistance protein domain containing protein.
NBS	Os11g0265900	Os11t0265900-02	NB-ARC,PF00931.23,Rx_N,PF18052.2	No_CC'	NB-ARC domain containing protein.
NBS	Os11g0270500	Os11t0270500-01	NB-ARC,PF00931.23,Rx_N,PF18052.2	No_CC'	NB-ARC domain containing protein.
NBS	Os11g0429100	Os11t0429100-00	NB-ARC,PF00931.23,Rx_N,PF18052.2	No_CC'	Hypothetical conserved gene.
NBS	Os11g0462500	Os11t0462500-00	NB-ARC,PF00931.23,Rx_N,PF18052.2	No_CC'	Similar to NB-ARC domain containing protein.
NBS	Os11g0462900	Os11t0462900-00	NB-ARC,PF00931.23,Transp_inhibit,PF18791.2,F-box_5,PF18511.2,Rx_N,PF18052.2,AAA_22,PF13401.7	No_CC'	Similar to NB-ARC domain containing protein, expressed.
NBS	Os11g0474500	Os11t0474500-00	NB-ARC,PF00931.23,Rx_N,PF18052.2	No_CC'	NB-ARC domain containing protein.
CC-NBS-LRR	Os11g0479100	Os11t0479100-00	NB-ARC,PF00931.23,Rx_N,PF18052.2,LRR_4,PF12799.8,LRR_8,PF13855.7	CC_region'	Similar to NB-ARC domain containing protein, expressed.
NBS-LRR	Os11g0480000	Os11t0480000-01	NB-ARC,PF00931.23,LRR_8,PF13855.7,AAA_22,PF13401.7	No_CC'	NB-ARC domain containing protein.
NBS	Os11g0481150	Os11t0481150-00	NB-ARC,PF00931.23	No_CC'	NB-ARC domain containing protein.
NBS	Os11g0485900	Os11t0485900-01	NB-ARC,PF00931.23,AAA_16,PF13191.7	No_CC'	Similar to NB-ARC domain containing protein, expressed.
NBS	Os11g0492200	Os11t0492200-00	NB-ARC,PF00931.23	No_CC'	Similar to NB-ARC domain containing protein.
NBS-LRR	Os11g0492300	Os11t0492300-00	NB-ARC,PF00931.23,LRR_4,PF12799.8	No_CC'	Similar to NB-ARC domain containing protein.
NBS	Os11g0492500	Os11t0492500-00	NB-ARC,PF00931.23	No_CC'	Similar to NB-ARC domain containing protein.
NBS	Os11g0492900	Os11t0492900-00	NB-ARC,PF00931.23	No_CC'	Similar to NBS-LRR type resistance protein (Fragment).
NBS	Os11g0493100	Os11t0493100-00	NB-ARC,PF00931.23,NACHT,PF05729.13	No_CC'	Similar to NB-ARC domain containing protein.
NBS-LRR	Os11g0493700	Os11t0493700-00	NB-ARC,PF00931.23,LRR_8,PF13855.7	No_CC'	Similar to NBS-LRR type resistance protein (Fragment).
NBS	Os11g0494100	Os11t0494100-00	NB-ARC,PF00931.23	No_CC'	Similar to NBS-LRR type resistance protein (Fragment).
NBS-LRR	Os11g0550100	Os11t0550100-01	NB-ARC,PF00931.23,AAA_14,PF13173.7,LRR_4,PF12799.8	No_CC'	Similar to NB-ARC domain containing protein, expressed.
NBS-LRR	Os11g0550500	Os11t0550500-01	NB-ARC,PF00931.23,Rx_N,PF18052.2,LRR_8,PF13855.7,LRR_4,PF12799.8	No_CC'	Similar to LZ-NBS-LRR class RGA.
NBS	Os11g0555300	Os11t0555300-00	NB-ARC,PF00931.23,Rx_N,PF18052.2,NACHT,PF05729.13	No_CC'	Similar to Rp1-like protein.
NBS-LRR	Os11g0572301	Os11t0572301-01	NB-ARC,PF00931.23,LRR_8,PF13855.7,LRR_4,PF12799.8	No_CC'	NB-ARC domain containing protein.
NBS-LRR	Os11g0579400	Os11t0579400-01	LRR_4,PF12799.8	No_CC'	Similar to Leucine Rich Repeat family protein, expressed.
NBS	Os11g0588400	Os11t0588400-01	NB-ARC,PF00931.23,Rx_N,PF18052.2	No_CC'	Similar to NB-ARC domain containing protein, expressed.
NBS	Os11g0588600	Os11t0588600-01	Rx_N,PF18052.2,NB-ARC,PF00931.23	No_CC'	NB-ARC domain containing protein.
CC-NBS	Os11g0589800	Os11t0589800-00	Rx_N,PF18052.2,NB-ARC,PF00931.23	CC_region'	Similar to NB-ARC domain containing protein.
NBS	Os11g0590700	Os11t0590700-01	NB-ARC,PF00931.23,Rx_N,PF18052.2	No_CC'	NB-ARC domain containing protein.
NBS	Os11g0592500	Os11t0592500-01	NB-ARC,PF00931.23	No_CC'	Similar to NB-ARC domain containing protein, expressed.
NBS	Os11g0597400	Os11t0597400-00	Rx_N,PF18052.2	No_CC'	Similar to Leucine Rich Repeat family protein, expressed.
NBS	Os11g0598300	Os11t0598300-00	Rx_N,PF18052.2	No_CC'	NB-ARC domain containing protein.
NBS	Os11g0598500	Os11t0598500-00	Rx_N,PF18052.2	No_CC'	NB-ARC domain containing protein.
NBS	Os11g0604900	Os11t0604900-00	NB-ARC,PF00931.23,Rx_N,PF18052.2	No_CC'	Similar to NB-ARC domain containing protein.
NBS	Os11g0605100	Os11t0605100-01	NB-ARC,PF00931.23	No_CC'	NB-ARC domain containing protein.
NBS	Os11g0606100	Os11t0606100-01	NB-ARC,PF00931.23,AAA_16,PF13191.7	No_CC'	NB-ARC domain containing protein.
NBS-LRR	Os11g0606200	Os11t0606200-01	LRR_8,PF13855.7,LRR_4,PF12799.8,NB-ARC,PF00931.23	No_CC'	Similar to Leucine Rich Repeat family protein, expressed.
NBS-LRR	Os11g0606400	Os11t0606400-02	NB-ARC,PF00931.23,LRR_4,PF12799.8,LRR_8,PF13855.7,NACHT,PF05729.13,AAA_16,PF13191.7	No_CC'	Similar to NB-ARC domain containing protein, expressed.
NBS	Os11g0606500	Os11t0606500-01	NB-ARC,PF00931.23,Rx_N,PF18052.2	No_CC'	Similar to NB-ARC domain containing protein, expressed.
NBS	Os11g0606800	Os11t0606800-00	NB-ARC,PF00931.23,NACHT,PF05729.13,AAA_16,PF13191.7	No_CC'	Similar to NB-ARC domain containing protein.
NBS	Os11g0609700	Os11t0609700-00	NB-ARC,PF00931.23,AAA_22,PF13401.7	No_CC'	Disease resistance protein domain containing protein.
NBS	Os11g0610000	Os11t0610000-00	NB-ARC,PF00931.23	No_CC'	Similar to NB-ARC domain containing protein.
CC-NBS-LRR	Os11g0623800	Os11t0623800-00	NB-ARC,PF00931.23,Rx_N,PF18052.2,LRR_8,PF13855.7,LRR_4,PF12799.8	CC_region'	Similar to NB-ARC domain containing protein.
CC-NBS	Os11g0629550	Os11t0629550-00	NB-ARC,PF00931.23,Rx_N,PF18052.2	CC_region'	Similar to Disease resistance protein RPM1 homolog.
NBS	Os11g0633500	Os11t0633500-01	NB-ARC,PF00931.23,Rx_N,PF18052.2	No_CC'	Similar to NBS-LRR disease resistance protein homologue (Fragment).
CC-NBS-LRR	Os11g0639600	Os11t0639600-01	NB-ARC,PF00931.23,Rx_N,PF18052.2,LRR_8,PF13855.7	CC_region'	NB-ARC domain containing protein.
NBS-LRR	Os11g0640300	Os11t0640300-01	NB-ARC,PF00931.23,LRR_8,PF13855.7,LRR_4,PF12799.8,NACHT,PF05729.13	No_CC'	NB-ARC domain containing protein.
NBS-LRR	Os11g0640600	Os11t0640600-00	NB-ARC,PF00931.23,LRR_8,PF13855.7,LRR_4,PF12799.8	No_CC'	NB-ARC domain containing protein.
NBS-LRR	Os11g0645800	Os11t0645800-00	LRR_4,PF12799.8	No_CC'	Similar to NB-ARC domain containing protein.
NBS	Os11g0646300	Os11t0646300-00	Rx_N,PF18052.2,NB-ARC,PF00931.23	No_CC'	NB-ARC domain containing protein.
NBS-LRR	Os11g0647866	Os11t0647866-00	LRR_4,PF12799.8	No_CC'	Similar to NB-ARC domain containing protein.
NBS	Os11g0654100	Os11t0654100-01	NB-ARC,PF00931.23,Rx_N,PF18052.2	No_CC'	NB-ARC domain containing protein.
NBS	Os11g0655200	Os11t0655200-01	NB-ARC,PF00931.23,Rx_N,PF18052.2	No_CC'	NB-ARC domain containing protein.
CC-NBS	Os11g0655300	Os11t0655300-01	NB-ARC,PF00931.23,Rx_N,PF18052.2	CC_region'	NB-ARC domain containing protein.
NBS	Os11g0657900	Os11t0657900-00	NB-ARC,PF00931.23,Rx_N,PF18052.2	No_CC'	Similar to NB-ARC domain containing protein.
NBS	Os11g0668100	Os11t0668100-00	NB-ARC,PF00931.23,AAA_22,PF13401.7	No_CC'	Similar to NB-ARC domain containing protein, expressed.
NBS-LRR	Os11g0673900	Os11t0673900-00	NB-ARC,PF00931.23,LRR_8,PF13855.7,LRR_4,PF12799.8	No_CC'	Similar to NB-ARC domain containing protein.
CC-NBS-LRR	Os11g0674400	Os11t0674400-00	NB-ARC,PF00931.23,Rx_N,PF18052.2,LRR_4,PF12799.8	CC_region'	Similar to NB-ARC domain containing protein, expressed.
CC-NBS	Os11g0676100	Os11t0676100-00	NB-ARC,PF00931.23,Rx_N,PF18052.2	CC_region'	Similar to NB-ARC domain containing protein, expressed.
NBS-LRR	Os11g0676200	Os11t0676200-00	NB-ARC,PF00931.23,LRR_8,PF13855.7,LRR_4,PF12799.8	No_CC'	Similar to NBS-LRR-like protein NBA2 (Fragment).
CC-NBS	Os11g0676800	Os11t0676800-00	NB-ARC,PF00931.23,Rx_N,PF18052.2	CC_region'	Similar to NB-ARC domain containing protein.
NBS-LRR	Os11g0678400	Os11t0678400-00	NB-ARC,PF00931.23,LRR_8,PF13855.7	No_CC'	Similar to NB-ARC domain containing protein, expressed.
NBS	Os11g0682501	Os11t0682501-00	NB-ARC,PF00931.23,AAA_16,PF13191.7,AAA_22,PF13401.7	No_CC'	Disease resistance protein domain containing protein.
NBS	Os11g0684100	Os11t0684100-01	NB-ARC,PF00931.23,Rx_N,PF18052.2	No_CC'	NB-ARC domain containing protein.
CC-NBS	Os11g0684700	Os11t0684700-01	NB-ARC,PF00931.23,Rx_N,PF18052.2	CC_region'	Similar to NB-ARC domain containing protein, expressed.
NBS	Os11g0686400	Os11t0686400-00	NB-ARC,PF00931.23,Rx_N,PF18052.2	No_CC'	Similar to WRKY transcription factor 41.
NBS	Os11g0686500	Os11t0686500-01	NB-ARC,PF00931.23,Rx_N,PF18052.2	No_CC'	NB-ARC domain containing protein.
NBS	Os11g0686900	Os11t0686900-00	NB-ARC,PF00931.23,Rx_N,PF18052.2	No_CC'	Similar to NB-ARC domain containing protein, expressed.
CC-NBS	Os11g0687800	Os11t0687800-01	NB-ARC,PF00931.23,Rx_N,PF18052.2	CC_region'	NB-ARC domain containing protein.
NBS	Os11g0689000	Os11t0689000-01	NB-ARC,PF00931.23	No_CC'	Similar to Leucine Rich Repeat family protein.
NBS	Os11g0689100	Os11t0689100-01	NB-ARC,PF00931.23,Rx_N,PF18052.2	No_CC'	NB-ARC domain containing protein.
NBS	Os11g0700100	Os11t0700100-01	NB-ARC,PF00931.23	No_CC'	Similar to LZ-NBS-LRR class RGA.
NBS-LRR	Os11g0704100	Os11t0704100-00	NB-ARC,PF00931.23,Rx_N,PF18052.2,LRR_8,PF13855.7	No_CC'	Similar to NB-ARC domain containing protein.
NBS	Os12g0131701	Os12t0131701-00	NB-ARC,PF00931.23	No_CC'	Similar to NB-ARC domain containing protein, expressed.
NBS	Os12g0166600	Os12t0166600-00	Rx_N,PF18052.2,NB-ARC,PF00931.23	No_CC'	Similar to NB-ARC domain containing protein.
NBS	Os12g0198900	Os12t0198900-00	NB-ARC,PF00931.23,Rx_N,PF18052.2,AAA_16,PF13191.7	No_CC'	Similar to NB-ARC domain containing protein.
NBS-LRR	Os12g0199100	Os12t0199100-01	NB-ARC,PF00931.23,Rx_N,PF18052.2,LRR_4,PF12799.8,LRR_8,PF13855.7	No_CC'	NB-ARC domain containing protein.
NBS	Os12g0204600	Os12t0204600-01	NB-ARC,PF00931.23	No_CC'	NB-ARC domain containing protein.
CC-NBS	Os12g0204800	Os12t0204800-01	NB-ARC,PF00931.23,Rx_N,PF18052.2	CC_region'	Disease resistance protein domain containing protein.
NBS	Os12g0205500	Os12t0205500-01	NB-ARC,PF00931.23	No_CC'	NB-ARC domain containing protein.
NBS	Os12g0209901	Os12t0209901-01	NB-ARC,PF00931.23,AAA_22,PF13401.7	No_CC'	Similar to NB-ARC domain containing protein, expressed.
NBS	Os12g0237900	Os12t0237900-01	NB-ARC,PF00931.23,Rx_N,PF18052.2	No_CC'	NB-ARC domain containing protein.
NBS	Os12g0246700	Os12t0246700-01	NB-ARC,PF00931.23,Rx_N,PF18052.2,AAA_16,PF13191.7	No_CC'	NB-ARC domain containing protein.
NBS	Os12g0270300	Os12t0270300-01	NB-ARC,PF00931.23,Rx_N,PF18052.2	No_CC'	NB-ARC domain containing protein.
NBS	Os12g0272800	Os12t0272800-01	NB-ARC,PF00931.23	No_CC'	Typical coiled-coil nucleotide binding leucine rich repeat (CC-NB-LRR) type protein, Defense response
NBS	Os12g0273300	Os12t0273300-01	NB-ARC,PF00931.23,Rx_N,PF18052.2	No_CC'	Similar to NB-ARC domain containing protein.
NBS	Os12g0281300	Os12t0281300-02	NB-ARC,PF00931.23,Thioredoxin,PF00085.21,Rx_N,PF18052.2,AAA_16,PF13191.7	No_CC'	Pi-ta protein belonging to the nucleotide-binding site leucine-rich repeat (NBS-LRR) class, Rice blast resistance (Nipponbare: susceptible)
CC-NBS	Os12g0281600	Os12t0281600-01	NB-ARC,PF00931.23,Rx_N,PF18052.2,AAA_16,PF13191.7	CC_region'	NB-ARC domain containing protein.
NBS	Os12g0438300	Os12t0438300-01	NB-ARC,PF00931.23,Rx_N,PF18052.2	No_CC'	NB-ARC domain containing protein.
NBS	Os12g0467300	Os12t0467300-01	NB-ARC,PF00931.23,Rx_N,PF18052.2,AAA_22,PF13401.7	No_CC'	NB-ARC domain containing protein.
NBS-LRR	Os12g0481400	Os12t0481400-00	NB-ARC,PF00931.23,Rx_N,PF18052.2,LRR_4,PF12799.8	No_CC'	Similar to NBS-LRR disease resistance protein homologue.
NBS-LRR	Os12g0481700	Os12t0481700-00	NB-ARC,PF00931.23,Rx_N,PF18052.2,LRR_4,PF12799.8	No_CC'	Disease resistance protein domain containing protein.
NBS-LRR	Os12g0482100	Os12t0482100-00	NB-ARC,PF00931.23,Rx_N,PF18052.2,LRR_4,PF12799.8	No_CC'	Disease resistance protein domain containing protein.
NBS	Os12g0489800	Os12t0489800-01	NB-ARC,PF00931.23,Rx_N,PF18052.2	No_CC'	Similar to NBS-LRR protein (Fragment).
CC-NBS	Os12g0495600	Os12t0495600-01	NB-ARC,PF00931.23,Rx_N,PF18052.2	CC_region'	NB-ARC domain containing protein.
NBS	Os12g0500500	Os12t0500500-01	NB-ARC,PF00931.23,Rx_N,PF18052.2,AAA_16,PF13191.7,AAA_22,PF13401.7	No_CC'	NB-ARC domain containing protein.
NBS	Os12g0511400	Os12t0511400-02	NB-ARC,PF00931.23	No_CC'	NB-ARC domain containing protein.
CC-NBS	Os12g0511500	Os12t0511500-01	NB-ARC,PF00931.23,Rx_N,PF18052.2,NACHT,PF05729.13	CC_region'	Disease resistance protein domain containing protein.
NBS	Os12g0511600	Os12t0511600-00	NB-ARC,PF00931.23	No_CC'	Similar to NB-ARC domain containing protein.
NBS	Os12g0511900	Os12t0511900-00	NB-ARC,PF00931.23,Rx_N,PF18052.2	No_CC'	Similar to NB-ARC domain containing protein, expressed.
NBS	Os12g0512400	Os12t0512400-01	NB-ARC,PF00931.23,Rx_N,PF18052.2	No_CC'	Similar to NB-ARC domain containing protein, expressed.
CC-NBS	Os12g0516300	Os12t0516300-01	NB-ARC,PF00931.23,Rx_N,PF18052.2,AAA_22,PF13401.7,AAA_14,PF13173.7	CC_region'	NB-ARC domain containing protein.
CC-NBS	Os12g0552900	Os12t0552900-01	NB-ARC,PF00931.23,Rx_N,PF18052.2,AAA_16,PF13191.7,AAA_22,PF13401.7	CC_region'	NB-ARC domain containing protein.
CC-NBS	Os12g0553200	Os12t0553200-01	NB-ARC,PF00931.23,Rx_N,PF18052.2,AAA_22,PF13401.7,AAA_14,PF13173.7	CC_region'	NB-ARC domain containing protein.
NBS	Os12g0559400	Os12t0559400-01	NB-ARC,PF00931.23,Rx_N,PF18052.2	No_CC'	Coiled-coil-nucleotide-binding-site-leucine-rich repeat (CC-NBS-LRR) protein, (LRR domain is lost in Nipponbare), Resistance to brown planthopper, (Nipponbare: BPH-susceptible)
NBS	Os12g0564800	Os12t0564800-01	NB-ARC,PF00931.23,Rx_N,PF18052.2	No_CC'	NB-ARC domain containing protein.
NBS-LRR	Os12g0565100	Os12t0565100-01	NB-ARC,PF00931.23,Rx_N,PF18052.2,LRR_8,PF13855.7	No_CC'	NB-ARC domain containing protein.
NBS-LRR	Os12g0586000	Os12t0586000-01	NB-ARC,PF00931.23,LRR_4,PF12799.8	No_CC'	Similar to Disease resistance protein ADR1 (Activated disease resistance protein 1).

## Sheet: Musa acuminata
Class	Gene_id	protein_id	NBS_domain/ids	CC_domain_Predicted	Descript
NBS	Ma00_g00770	Ma00_p00770.1	NB-ARC,PF00931.23	'No_CC'	Uncharacterized protein
NBS	Ma01_g03960	Ma01_p03960.1	NB-ARC,PF00931.23	'No_CC'	Uncharacterized protein
NBS-LRR	Ma01_g03970	Ma01_p03970.1	NB-ARC,PF00931.23,LRR_4,PF12799.8,LRR_8,PF13855.7,AAA_22,PF13401.7	'No_CC'	Uncharacterized protein
NBS	Ma01_g03990	Ma01_p03990.1	NB-ARC,PF00931.23,AAA_16,PF13191.7	'No_CC'	Putative Disease resistance RPP13-like protein 4
NBS	Ma01_g06150	Ma01_p06150.1	NB-ARC,PF00931.23,Rx_N,PF18052.2	'No_CC'	Putative disease resistance protein RGA4
NBS-LRR	Ma01_g06160	Ma01_p06160.1	NB-ARC,PF00931.23,Rx_N,PF18052.2,LRR_8,PF13855.7,LRR_4,PF12799.8	'No_CC'	Putative disease resistance protein RGA4
NBS	Ma01_g06170	Ma01_p06170.1	NB-ARC,PF00931.23,Rx_N,PF18052.2	'No_CC'	Putative disease resistance protein RGA1
NBS-LRR	Ma01_g07540	Ma01_p07540.1	NB-ARC,PF00931.23,Rx_N,PF18052.2,LRR_4,PF12799.8	'No_CC'	Putative disease resistance protein RGA4
NBS	Ma01_g07550	Ma01_p07550.1	NB-ARC,PF00931.23,Rx_N,PF18052.2	'No_CC'	Putative disease resistance protein RGA4
NBS-LRR	Ma01_g22770	Ma01_p22770.1	NB-ARC,PF00931.23,LRR_4,PF12799.8,LRR_8,PF13855.7,Rx_N,PF18052.2	'No_CC'	Putative Leucine Rich Repeat family protein, expressed
CC-NBS-LRR	Ma02_g05560	Ma02_p05560.1	NB-ARC,PF00931.23,Rx_N,PF18052.2,LRR_8,PF13855.7,LRR_4,PF12799.8	'CC_region'	Putative disease resistance protein RGA4
CC-NBS-LRR	Ma02_g13220	Ma02_p13220.1	NB-ARC,PF00931.23,Rx_N,PF18052.2,LRR_4,PF12799.8,AAA_16,PF13191.7	'CC_region'	Putative disease resistance protein RGA4
NBS-LRR	Ma03_g09130	Ma03_p09130.1	NB-ARC,PF00931.23,Rx_N,PF18052.2,LRR_4,PF12799.8,LRR_8,PF13855.7	'No_CC'	Putative disease resistance RPP13-like protein 1
NBS	Ma03_g10480	Ma03_p10480.1	NB-ARC,PF00931.23,Rx_N,PF18052.2	'No_CC'	NBS-LRR type disease resistance protein, putative, expressed
NBS-LRR	Ma03_g23220	Ma03_p23220.1	NB-ARC,PF00931.23,LRR_4,PF12799.8,LRR_8,PF13855.7	'No_CC'	Putative Disease resistance protein RGA2
NBS-LRR	Ma03_g23230	Ma03_p23230.1	LRR_4,PF12799.8,LRR_8,PF13855.7	'No_CC'	Putative disease resistance RPP13-like protein 1
NBS-LRR	Ma03_g23250	Ma03_p23250.1	NB-ARC,PF00931.23,LRR_8,PF13855.7	'No_CC'	Putative disease resistance protein RGA1
CC-NBS	Ma03_g23270	Ma03_p23270.1	NB-ARC,PF00931.23,Rx_N,PF18052.2,AAA_16,PF13191.7	'CC_region'	Putative disease resistance RPP13-like protein 1
NBS-LRR	Ma03_g23290	Ma03_p23290.1	NB-ARC,PF00931.23,Rx_N,PF18052.2,LRR_4,PF12799.8,LRR_8,PF13855.7,AAA_16,PF13191.7	'No_CC'	Putative disease resistance RPP13-like protein 1
NBS-LRR	Ma03_g23310	Ma03_p23310.1	NB-ARC,PF00931.23,LRR_4,PF12799.8,Rx_N,PF18052.2,LRR_8,PF13855.7,AAA_16,PF13191.7	'No_CC'	Putative disease resistance RPP13-like protein 1
CC-NBS-LRR	Ma03_g23320	Ma03_p23320.1	NB-ARC,PF00931.23,LRR_4,PF12799.8,Rx_N,PF18052.2,LRR_8,PF13855.7,AAA_16,PF13191.7	'CC_region'	Putative disease resistance RPP13-like protein 1
NBS-LRR	Ma03_g23340	Ma03_p23340.1	LRR_4,PF12799.8,NB-ARC,PF00931.23,LRR_8,PF13855.7	'No_CC'	Putative disease resistance RPP13-like protein 1
NBS-LRR	Ma03_g23350	Ma03_p23350.1	NB-ARC,PF00931.23,LRR_4,PF12799.8,LRR_8,PF13855.7	'No_CC'	Putative disease resistance protein RGA3
NBS-LRR	Ma03_g23360	Ma03_p23360.1	NB-ARC,PF00931.23,LRR_4,PF12799.8,LRR_8,PF13855.7	'No_CC'	CC-NBS-LRR protein, putative, expressed
NBS	Ma03_g23380	Ma03_p23380.1	NB-ARC,PF00931.23,Rx_N,PF18052.2,AAA_16,PF13191.7	'No_CC'	Putative NB-ARC domain containing protein, expressed
NBS-LRR	Ma03_g23410	Ma03_p23410.1	NB-ARC,PF00931.23,LRR_4,PF12799.8,Rx_N,PF18052.2,LRR_8,PF13855.7,AAA_16,PF13191.7	'No_CC'	Putative disease resistance protein RGA1
NBS-LRR	Ma03_g23440	Ma03_p23440.1	NB-ARC,PF00931.23,LRR_4,PF12799.8,LRR_8,PF13855.7	'No_CC'	Putative disease resistance protein RGA1
NBS-LRR	Ma03_g26210	Ma03_p26210.1	LRR_4,PF12799.8,LRR_8,PF13855.7	'No_CC'	Putative disease resistance protein RGA4
NBS-LRR	Ma03_g28820	Ma03_p28820.1	NB-ARC,PF00931.23,LRR_8,PF13855.7	'No_CC'	Putative disease resistance RPP13-like protein 1
NBS-LRR	Ma03_g28850	Ma03_p28850.1	NB-ARC,PF00931.23,LRR_4,PF12799.8,LRR_8,PF13855.7,AAA_22,PF13401.7	'No_CC'	Putative disease resistance protein RGA3
CC-NBS-LRR	Ma03_g28860	Ma03_p28860.1	NB-ARC,PF00931.23,Rx_N,PF18052.2,LRR_4,PF12799.8,LRR_8,PF13855.7	'CC_region'	Putative Disease resistance protein RGA2
CC-NBS-LRR	Ma03_g28870	Ma03_p28870.1	NB-ARC,PF00931.23,Rx_N,PF18052.2,LRR_4,PF12799.8,LRR_8,PF13855.7,AAA_22,PF13401.7	'CC_region'	Putative Disease resistance protein RGA2
NBS	Ma03_g28880	Ma03_p28880.1	NB-ARC,PF00931.23,AAA_22,PF13401.7	'No_CC'	NBS-LRR disease resistance protein, putative, expressed
NBS-LRR	Ma03_g28890	Ma03_p28890.1	NB-ARC,PF00931.23,LRR_8,PF13855.7,LRR_4,PF12799.8	'No_CC'	Putative disease resistance RPP13-like protein 1
CC-NBS-LRR	Ma03_g28900	Ma03_p28900.1	NB-ARC,PF00931.23,Rx_N,PF18052.2,LRR_4,PF12799.8,LRR_8,PF13855.7	'CC_region'	Putative disease resistance protein RGA3
CC-NBS-LRR	Ma03_g28910	Ma03_p28910.1	NB-ARC,PF00931.23,Rx_N,PF18052.2,LRR_4,PF12799.8,LRR_8,PF13855.7	'CC_region'	Putative Disease resistance protein RGA2
NBS-LRR	Ma03_g28950	Ma03_p28950.1	LRR_4,PF12799.8,LRR_8,PF13855.7,NB-ARC,PF00931.23	'No_CC'	Putative disease resistance protein RGA3
NBS	Ma03_g28960	Ma03_p28960.1	NB-ARC,PF00931.23	'No_CC'	Putative disease resistance protein RGA1
CC-NBS-LRR	Ma03_g28970	Ma03_p28970.1	NB-ARC,PF00931.23,Rx_N,PF18052.2,LRR_4,PF12799.8,LRR_8,PF13855.7	'CC_region'	Putative Disease resistance protein RGA2
NBS-LRR	Ma03_g28980	Ma03_p28980.1	NB-ARC,PF00931.23,Rx_N,PF18052.2,LRR_4,PF12799.8,LRR_8,PF13855.7,AAA_22,PF13401.7	'No_CC'	Hypothetical protein
NBS-LRR	Ma03_g29100	Ma03_p29100.1	NB-ARC,PF00931.23,LRR_4,PF12799.8,LRR_8,PF13855.7	'No_CC'	Putative disease resistance RPP13-like protein 1
CC-NBS-LRR	Ma03_g29320	Ma03_p29320.1	NB-ARC,PF00931.23,Rx_N,PF18052.2,LRR_4,PF12799.8,LRR_8,PF13855.7,AAA_22,PF13401.7	'CC_region'	Putative Disease resistance protein RGA2
NBS-LRR	Ma04_g32720	Ma04_p32720.1	NB-ARC,PF00931.23,Rx_N,PF18052.2,LRR_4,PF12799.8,LRR_8,PF13855.7	'No_CC'	Putative disease resistance protein RGA3
NBS	Ma04_g32740	Ma04_p32740.1	Rx_N,PF18052.2,NB-ARC,PF00931.23	'No_CC'	Putative disease resistance protein RGA3
NBS	Ma04_g32750	Ma04_p32750.1	NB-ARC,PF00931.23	'No_CC'	Putative disease resistance protein RGA3
CC-NBS-LRR	Ma04_g35240	Ma04_p35240.1	NB-ARC,PF00931.23,LRR_8,PF13855.7,LRR_4,PF12799.8,AAA_22,PF13401.7	'CC_region'	Putative Disease resistance protein RPS5
NBS-LRR	Ma04_g37570	Ma04_p37570.1	NB-ARC,PF00931.23,Rx_N,PF18052.2,LRR_4,PF12799.8,AAA_16,PF13191.7,LRR_8,PF13855.7	'No_CC'	Putative disease resistance protein RGA3
NBS-LRR	Ma05_g04000	Ma05_p04000.1	NB-ARC,PF00931.23,Rx_N,PF18052.2,LRR_8,PF13855.7	'No_CC'	Putative Disease resistance protein RPM1
CC-NBS-LRR	Ma05_g11410	Ma05_p11410.1	NB-ARC,PF00931.23,LRR_8,PF13855.7,Rx_N,PF18052.2,LRR_4,PF12799.8,AAA_16,PF13191.7	'CC_region'	Putative disease resistance protein RGA4
CC-NBS-LRR	Ma05_g11770	Ma05_p11770.1	NB-ARC,PF00931.23,LRR_4,PF12799.8,LRR_8,PF13855.7	'CC_region'	Putative Disease resistance protein RPS2
NBS-LRR	Ma06_g00230	Ma06_p00230.1	LRR_8,PF13855.7,LRR_4,PF12799.8,NB-ARC,PF00931.23,Rx_N,PF18052.2	'No_CC'	Putative disease resistance protein RGA4
NBS-LRR	Ma06_g00440	Ma06_p00440.1	LRR_8,PF13855.7,LRR_4,PF12799.8,NB-ARC,PF00931.23,Rx_N,PF18052.2	'No_CC'	Putative disease resistance protein RGA4
NBS-LRR	Ma06_g00580	Ma06_p00580.1	NB-ARC,PF00931.23,LRR_8,PF13855.7,LRR_4,PF12799.8	'No_CC'	Hypothetical protein
CC-NBS-LRR	Ma06_g10160	Ma06_p10160.1	NB-ARC,PF00931.23,Rx_N,PF18052.2,LRR_4,PF12799.8,AAA_16,PF13191.7,LRR_8,PF13855.7	'CC_region'	Putative disease resistance RPP13-like protein 1
NBS-LRR	Ma06_g12930	Ma06_p12930.1	NB-ARC,PF00931.23,LRR_8,PF13855.7,LRR_4,PF12799.8	'No_CC'	Putative Disease resistance protein RPS2
NBS-LRR	Ma06_g21040	Ma06_p21040.1	NB-ARC,PF00931.23,Rx_N,PF18052.2,AAA_16,PF13191.7,LRR_4,PF12799.8,LRR_8,PF13855.7	'No_CC'	Putative disease resistance RPP13-like protein 1
NBS	Ma06_g21200	Ma06_p21200.1	NB-ARC,PF00931.23,Rx_N,PF18052.2,AAA_16,PF13191.7	'No_CC'	Putative Disease resistance protein RGA2
NBS-LRR	Ma06_g23890	Ma06_p23890.1	NB-ARC,PF00931.23,Rx_N,PF18052.2,LRR_4,PF12799.8,LRR_8,PF13855.7,AAA_16,PF13191.7	'No_CC'	Putative disease resistance RPP13-like protein 1
NBS	Ma06_g23910	Ma06_p23910.1	NB-ARC,PF00931.23	'No_CC'	Putative disease resistance protein RGA1
NBS-LRR	Ma06_g31500	Ma06_p31500.1	NB-ARC,PF00931.23,Rx_N,PF18052.2,AAA_16,PF13191.7,LRR_4,PF12799.8	'No_CC'	Putative Disease resistance protein RPM1
CC-NBS	Ma06_g33700	Ma06_p33700.1	NB-ARC,PF00931.23,Rx_N,PF18052.2	'CC_region'	Putative disease resistance RPP13-like protein 1
NBS	Ma06_g33710	Ma06_p33710.1	NB-ARC,PF00931.23,AAA_16,PF13191.7	'No_CC'	Putative disease resistance protein RGA3
NBS-LRR	Ma06_g33720	Ma06_p33720.1	NB-ARC,PF00931.23,Rx_N,PF18052.2,LRR_8,PF13855.7,LRR_4,PF12799.8	'No_CC'	Putative disease resistance RPP13-like protein 1
CC-NBS-LRR	Ma06_g36620	Ma06_p36620.1	NB-ARC,PF00931.23,LRR_4,PF12799.8,Rx_N,PF18052.2	'CC_region'	Putative disease resistance protein RGA1
CC-NBS-LRR	Ma06_g37760	Ma06_p37760.1	NB-ARC,PF00931.23,LRR_8,PF13855.7,LRR_4,PF12799.8,Rx_N,PF18052.2	'CC_region'	disease resistance protein RGA2, putative, expressed
NBS-LRR	Ma07_g08220	Ma07_p08220.1	NB-ARC,PF00931.23,RPW8,PF05659.12,LRR_4,PF12799.8	'No_CC'	Probable disease resistance protein At4g33300
CC-NBS-LRR	Ma07_g08480	Ma07_p08480.1	NB-ARC,PF00931.23,LRR_8,PF13855.7,LRR_4,PF12799.8	'CC_region'	Putative Disease resistance protein RPS2
CC-NBS-LRR	Ma07_g08510	Ma07_p08510.1	NB-ARC,PF00931.23,LRR_8,PF13855.7,LRR_4,PF12799.8	'CC_region'	Putative Disease resistance protein RPS2
NBS-LRR	Ma07_g12600	Ma07_p12600.1	NB-ARC,PF00931.23,Rx_N,PF18052.2,LRR_8,PF13855.7,LRR_4,PF12799.8	'No_CC'	Putative Disease resistance protein RGA2
NBS	Ma07_g21710	Ma07_p21710.1	NB-ARC,PF00931.23,Rx_N,PF18052.2	'No_CC'	Putative Disease resistance RPP8-like protein 3
NBS-LRR	Ma07_g21720	Ma07_p21720.1	NB-ARC,PF00931.23,Rx_N,PF18052.2,LRR_4,PF12799.8	'No_CC'	Putative Disease resistance RPP8-like protein 3
NBS	Ma07_g21730	Ma07_p21730.1	NB-ARC,PF00931.23,Rx_N,PF18052.2	'No_CC'	Putative Probable disease resistance RPP8-like protein 2
NBS-LRR	Ma07_g21750	Ma07_p21750.1	NB-ARC,PF00931.23,LRR_4,PF12799.8	'No_CC'	Putative Disease resistance RPP8-like protein 3
NBS	Ma07_g21760	Ma07_p21760.1	NB-ARC,PF00931.23	'No_CC'	Putative disease resistance RPP13-like protein 3
CC-NBS-LRR	Ma07_g22920	Ma07_p22920.1	NB-ARC,PF00931.23,Rx_N,PF18052.2,LRR_4,PF12799.8,LRR_8,PF13855.7	'CC_region'	Putative Disease resistance protein RGA2
NBS-LRR	Ma08_g03590	Ma08_p03590.1	NB-ARC,PF00931.23,LRR_8,PF13855.7,LRR_4,PF12799.8	'No_CC'	Putative disease resistance RPP13-like protein 1
NBS-LRR	Ma08_g22350	Ma08_p22350.1	NB-ARC,PF00931.23,Rx_N,PF18052.2,LRR_8,PF13855.7	'No_CC'	disease resistance RPP13-like protein 1, putative, expressed
NBS	Ma08_g26530	Ma08_p26530.1	NB-ARC,PF00931.23,Rx_N,PF18052.2	'No_CC'	Putative Disease resistance protein RPM1
NBS-LRR	Ma08_g31160	Ma08_p31160.1	NB-ARC,PF00931.23,Rx_N,PF18052.2,LRR_8,PF13855.7	'No_CC'	Putative Disease resistance protein RPM1
NBS-LRR	Ma09_g02460	Ma09_p02460.1	NB-ARC,PF00931.23,LRR_8,PF13855.7,LRR_4,PF12799.8,ATPase_2,PF01637.19	'No_CC'	Putative Disease resistance protein RPS2
NBS-LRR	Ma09_g02700	Ma09_p02700.1	NB-ARC,PF00931.23,Rx_N,PF18052.2,LRR_4,PF12799.8,LRR_8,PF13855.7	'No_CC'	Putative Disease resistance protein RGA2
NBS-LRR	Ma09_g02710	Ma09_p02710.1	NB-ARC,PF00931.23,Rx_N,PF18052.2,LRR_4,PF12799.8,LRR_8,PF13855.7	'No_CC'	Putative disease resistance protein RGA4
NBS	Ma09_g02750	Ma09_p02750.1	NB-ARC,PF00931.23,Rx_N,PF18052.2,AAA_16,PF13191.7	'No_CC'	Putative Disease resistance protein RGA2
CC-NBS	Ma09_g11010	Ma09_p11010.1	NB-ARC,PF00931.23,Rx_N,PF18052.2	'CC_region'	Putative disease resistance RPP13-like protein 1
NBS	Ma09_g11250	Ma09_p11250.1	NB-ARC,PF00931.23,Rx_N,PF18052.2	'No_CC'	Putative disease resistance protein RGA1
NBS-LRR	Ma09_g11290	Ma09_p11290.1	NB-ARC,PF00931.23,Rx_N,PF18052.2,LRR_8,PF13855.7,LRR_4,PF12799.8	'No_CC'	Putative disease resistance protein RGA1
NBS-LRR	Ma09_g11730	Ma09_p11730.1	LRR_4,PF12799.8	'No_CC'	disease resistance protein, putative, expressed
NBS-LRR	Ma09_g12410	Ma09_p12410.1	NB-ARC,PF00931.23,Rx_N,PF18052.2,LRR_8,PF13855.7,AAA_16,PF13191.7	'No_CC'	Putative Disease resistance protein RPM1
NBS-LRR	Ma09_g16750	Ma09_p16750.1	NB-ARC,PF00931.23,Rx_N,PF18052.2,LRR_4,PF12799.8	'No_CC'	Putative Disease resistance protein RGA2
CC-NBS-LRR	Ma09_g16930	Ma09_p16930.1	NB-ARC,PF00931.23,Rx_N,PF18052.2,LRR_4,PF12799.8,LRR_8,PF13855.7	'CC_region'	Putative disease resistance protein RGA3
NBS	Ma09_g18320	Ma09_p18320.1	Rx_N,PF18052.2,NB-ARC,PF00931.23	'No_CC'	Putative Disease resistance protein RPP13
NBS	Ma09_g18330	Ma09_p18330.1	Rx_N,PF18052.2,NB-ARC,PF00931.23	'No_CC'	Putative Disease resistance protein RPP13
CC-NBS-LRR	Ma09_g20600	Ma09_p20600.1	NB-ARC,PF00931.23,Rx_N,PF18052.2,LRR_8,PF13855.7,LRR_4,PF12799.8	'CC_region'	Putative disease resistance protein RGA4
NBS-LRR	Ma09_g23520	Ma09_p23520.2	NB-ARC,PF00931.23,Rx_N,PF18052.2,LRR_4,PF12799.8,LRR_8,PF13855.7	'No_CC'	Putative Disease resistance protein RGA2
CC-NBS-LRR	Ma09_g28690	Ma09_p28690.1	NB-ARC,PF00931.23,Rx_N,PF18052.2,LRR_4,PF12799.8,LRR_8,PF13855.7	'CC_region'	Putative Disease resistance protein RPM1
NBS-LRR	Ma09_g28700	Ma09_p28700.1	NB-ARC,PF00931.23,Rx_N,PF18052.2,LRR_8,PF13855.7	'No_CC'	Putative Disease resistance protein RPM1
CC-NBS-LRR	Ma10_g08130	Ma10_p08130.1	NB-ARC,PF00931.23,Rx_N,PF18052.2,LRR_4,PF12799.8,LRR_8,PF13855.7	'CC_region'	Putative disease resistance protein RGA4
NBS	Ma10_g08140	Ma10_p08140.1	Rx_N,PF18052.2,NB-ARC,PF00931.23	'No_CC'	Putative disease resistance protein RGA4
NBS	Ma10_g08150	Ma10_p08150.1	NB-ARC,PF00931.23	'No_CC'	Putative disease resistance protein RGA3
NBS-LRR	Ma10_g08170	Ma10_p08170.1	NB-ARC,PF00931.23,Rx_N,PF18052.2,LRR_8,PF13855.7,LRR_4,PF12799.8	'No_CC'	Putative disease resistance protein RGA4
CC-NBS-LRR	Ma10_g08180	Ma10_p08180.1	NB-ARC,PF00931.23,Rx_N,PF18052.2,LRR_8,PF13855.7,LRR_4,PF12799.8	'CC_region'	Putative disease resistance protein RGA4
CC-NBS	Ma10_g08190	Ma10_p08190.1	NB-ARC,PF00931.23,Rx_N,PF18052.2	'CC_region'	Putative NB-ARC domain containing protein, expressed
CC-NBS-LRR	Ma10_g08230	Ma10_p08230.1	NB-ARC,PF00931.23,Rx_N,PF18052.2,LRR_8,PF13855.7,LRR_4,PF12799.8	'CC_region'	Putative disease resistance protein RGA3
NBS-LRR	Ma10_g08240	Ma10_p08240.1	NB-ARC,PF00931.23,Rx_N,PF18052.2,LRR_4,PF12799.8,LRR_8,PF13855.7	'No_CC'	Putative disease resistance protein RGA4
NBS-LRR	Ma10_g08250	Ma10_p08250.1	NB-ARC,PF00931.23,LRR_4,PF12799.8,LRR_8,PF13855.7	'No_CC'	Putative disease resistance RPP13-like protein 1
NBS-LRR	Ma10_g24790	Ma10_p24790.1	NB-ARC,PF00931.23,LRR_8,PF13855.7,LRR_4,PF12799.8	'No_CC'	Putative disease resistance RPP13-like protein 1
NBS-LRR	Ma10_g24800	Ma10_p24800.1	NB-ARC,PF00931.23,LRR_8,PF13855.7,LRR_4,PF12799.8	'No_CC'	Putative disease resistance RPP13-like protein 1
NBS-LRR	Ma10_g24810	Ma10_p24810.1	NB-ARC,PF00931.23,Rx_N,PF18052.2,LRR_8,PF13855.7,LRR_4,PF12799.8	'No_CC'	Putative disease resistance RPP13-like protein 1
NBS-LRR	Ma10_g29330	Ma10_p29330.1	NB-ARC,PF00931.23,Rx_N,PF18052.2,LRR_4,PF12799.8,LRR_8,PF13855.7	'No_CC'	Putative Disease resistance protein RGA2
NBS-LRR	Ma11_g07130	Ma11_p07130.1	NB-ARC,PF00931.23,Rx_N,PF18052.2,LRR_4,PF12799.8,LRR_8,PF13855.7	'No_CC'	Putative disease resistance protein RGA3
CC-NBS	Ma11_g17050	Ma11_p17050.1	NB-ARC,PF00931.23,Rx_N,PF18052.2,AAA_16,PF13191.7	'CC_region'	Putative Disease resistance protein RGA2
CC-NBS	Ma11_g17060	Ma11_p17060.1	NB-ARC,PF00931.23,Rx_N,PF18052.2,AAA_16,PF13191.7	'CC_region'	Putative disease resistance RPP13-like protein 1
CC-NBS-LRR	Ma11_g23430	Ma11_p23430.1	NB-ARC,PF00931.23,Rx_N,PF18052.2,LRR_4,PF12799.8,LRR_8,PF13855.7,AAA_22,PF13401.7	'CC_region'	Putative disease resistance protein RGA3

## Sheet: Solanum tuberosum
Class	Gene_id	protein_id	NBS_domain/ids	CC_domain_Predicted	Descript
NBS	PGSC0003DMG400000813	PGSC0003DMP400001549	NB-ARC,PF00931.23,NACHT,PF05729.13	'No_CC'	NBS-LRR resistance protein
NBS	PGSC0003DMG400000815	PGSC0003DMP400001553	NB-ARC,PF00931.23,AAA_22,PF13401.7	'No_CC'	NBS-coding resistance gene analog
NBS	PGSC0003DMG400000816	PGSC0003DMP400001554	NB-ARC,PF00931.23	'No_CC'	Tospovirus resistance protein A
TIR-NBS-LRR	PGSC0003DMG400000888	PGSC0003DMP400001685	TIR,PF01582.21,NB-ARC,PF00931.23,LRR_8,PF13855.7,TIR_2,PF13676.7,LRR_4,PF12799.8,AAA_16,PF13191.7,AAA_22,PF13401.7,AAA_14,PF13173.7,AAA_18,PF13238.7	'No_CC'	Resistance gene
NBS	PGSC0003DMG400001081	PGSC0003DMP400002016	NB-ARC,PF00931.23	'No_CC'	NBS-LRR protein
NBS	PGSC0003DMG400001981	PGSC0003DMP400003559	NB-ARC,PF00931.23,Rx_N,PF18052.2	'No_CC'	NBS-LRR protein
NBS	PGSC0003DMG400001982	PGSC0003DMP400003560	NB-ARC,PF00931.23	'No_CC'	NBS-coding resistance gene analog
NBS	PGSC0003DMG400001983	PGSC0003DMP400003561	NB-ARC,PF00931.23	'No_CC'	Disease resistance protein BS2
NBS	PGSC0003DMG400001989	PGSC0003DMP400003574	NB-ARC,PF00931.23	'No_CC'	PRF
NBS	PGSC0003DMG400001990	PGSC0003DMP400003575	NB-ARC,PF00931.23	'No_CC'	NBS-coding resistance gene analog
NBS	PGSC0003DMG400001992	PGSC0003DMP400003578	NB-ARC,PF00931.23	'No_CC'	Disease resistance protein BS2
NBS	PGSC0003DMG400001993	PGSC0003DMP400003579	NB-ARC,PF00931.23	'No_CC'	Disease resistance protein Gpa2
NBS	PGSC0003DMG400001994	PGSC0003DMP400003580	NB-ARC,PF00931.23,Rx_N,PF18052.2	'No_CC'	NBS-LRR protein
CC-NBS	PGSC0003DMG400001996	PGSC0003DMP400003582	NB-ARC,PF00931.23	'CC_region'	Resistance protein PSH-RGH6
CC-NBS	PGSC0003DMG400002217	PGSC0003DMP400003951	NB-ARC,PF00931.23	'CC_region'	NBS-LRR resistance protein
NBS-LRR	PGSC0003DMG400002271	PGSC0003DMP400004052	NB-ARC,PF00931.23,LRR_8,PF13855.7	'No_CC'	Disease resistance protein
CC-NBS-LRR	PGSC0003DMG400002275	PGSC0003DMP400004056	NB-ARC,PF00931.23,LRR_4,PF12799.8,LRR_8,PF13855.7	'CC_region'	Cc-nbs-lrr resistance protein
CC-NBS	PGSC0003DMG400002276	PGSC0003DMP400004057	NB-ARC,PF00931.23	'CC_region'	Conserved gene of unknown function
NBS	PGSC0003DMG400002277	PGSC0003DMP400004059	NB-ARC,PF00931.23	'No_CC'	Disease resistance protein
NBS-LRR	PGSC0003DMG400002278	PGSC0003DMP400004060	NB-ARC,PF00931.23,LRR_8,PF13855.7,LRR_4,PF12799.8	'No_CC'	Conserved gene of unknown function
TIR-NBS-LRR	PGSC0003DMG400002357	PGSC0003DMP400004210	TIR,PF01582.21,NB-ARC,PF00931.23,TIR_2,PF13676.7,LRR_4,PF12799.8,LRR_8,PF13855.7	'No_CC'	Bacterial spot disease resistance protein 4
TIR-NBS-LRR	PGSC0003DMG400002426	PGSC0003DMP400004305	TIR,PF01582.21,LRR_8,PF13855.7,NB-ARC,PF00931.23,LRR_4,PF12799.8,TIR_2,PF13676.7	'No_CC'	Resistance gene
TIR-NBS-LRR	PGSC0003DMG400002427	PGSC0003DMP400004307	TIR,PF01582.21,NB-ARC,PF00931.23,TIR_2,PF13676.7,LRR_4,PF12799.8,LRR_8,PF13855.7,AAA_16,PF13191.7,AAA_22,PF13401.7	'No_CC'	Bacterial spot disease resistance protein 4
TIR-NBS-LRR	PGSC0003DMG400002799	PGSC0003DMP400005063	TIR,PF01582.21,NB-ARC,PF00931.23,LRR_8,PF13855.7,TIR_2,PF13676.7	'No_CC'	TMV resistance protein N
CC-NBS	PGSC0003DMG400002820	PGSC0003DMP400005102	NB-ARC,PF00931.23,NACHT,PF05729.13	'CC_region'	Conserved gene of unknown function
NBS	PGSC0003DMG400002920	PGSC0003DMP400005261	NB-ARC,PF00931.23	'No_CC'	RGC1
CC-NBS	PGSC0003DMG400002947	PGSC0003DMP400005309	NB-ARC,PF00931.23	'CC_region'	NRC1
NBS-LRR	PGSC0003DMG400002960	PGSC0003DMP400005332	LRR_4,PF12799.8,Rx_N,PF18052.2	'No_CC'	Disease resistance protein BS2
NBS-LRR	PGSC0003DMG400002980	PGSC0003DMP400005353	NB-ARC,PF00931.23,Rx_N,PF18052.2,LRR_4,PF12799.8,AAA_16,PF13191.7,LRR_8,PF13855.7	'No_CC'	Disease resistance protein R3a
NBS-LRR	PGSC0003DMG400002982	PGSC0003DMP400005354	LRR_8,PF13855.7,LRR_4,PF12799.8,NB-ARC,PF00931.23	'No_CC'	Potato resistance I2GA-SH23-1
NBS	PGSC0003DMG400003020	PGSC0003DMP400005428	NB-ARC,PF00931.23	'No_CC'	Disease resistance protein R3a
NBS-LRR	PGSC0003DMG400003104	PGSC0003DMP400005582	NB-ARC,PF00931.23,Rx_N,PF18052.2,LRR_4,PF12799.8,LRR_8,PF13855.7	'No_CC'	Nbs-lrr resistance protein
NBS	PGSC0003DMG400003353	PGSC0003DMP400006006	NB-ARC,PF00931.23	'No_CC'	NBS-LRR resistance protein
NBS-LRR	PGSC0003DMG400003380	PGSC0003DMP400006047	NB-LRR,PF12061.9,NB-ARC,PF00931.23	'No_CC'	Late blight resistance protein homolog R1A-4
TIR-NBS-LRR	PGSC0003DMG400003445	PGSC0003DMP400006143	TIR,PF01582.21,NB-ARC,PF00931.23,TIR_2,PF13676.7,LRR_8,PF13855.7,Prenyltransf,PF01255.20,LRR_4,PF12799.8	'No_CC'	Disease resistance protein
CC-NBS	PGSC0003DMG400003527	PGSC0003DMP400006281	NB-ARC,PF00931.23,Rx_N,PF18052.2,AAA_22,PF13401.7	'CC_region'	Disease resistance protein RGA2
NBS	PGSC0003DMG400003794	PGSC0003DMP400006764	NB-ARC,PF00931.23,F-box,PF00646.34	'No_CC'	Tospovirus resistance protein E
NBS	PGSC0003DMG400003800	PGSC0003DMP400006771	NB-ARC,PF00931.23	'No_CC'	Hero resistance protein
NBS	PGSC0003DMG400004295	PGSC0003DMP400007645	NB-ARC,PF00931.23	'No_CC'	NBS-LRR protein
NBS	PGSC0003DMG400004296	PGSC0003DMP400007646	NB-ARC,PF00931.23	'No_CC'	Disease resistance protein Gpa2
NBS	PGSC0003DMG400004303	PGSC0003DMP400007655	NB-ARC,PF00931.23	'No_CC'	NBS-coding resistance gene analog
NBS	PGSC0003DMG400004413	PGSC0003DMP400007835	NB-ARC,PF00931.23,Rx_N,PF18052.2	'No_CC'	Tm-2 protein
NBS	PGSC0003DMG400004523	PGSC0003DMP400007996	NB-ARC,PF00931.23	'No_CC'	NBS-coding resistance gene analog
NBS	PGSC0003DMG400004524	PGSC0003DMP400007997	NB-ARC,PF00931.23	'No_CC'	NBS-coding resistance gene analog
CC-NBS	PGSC0003DMG400004561	PGSC0003DMP400008046	NB-ARC,PF00931.23	'CC_region'	Late blight resistance protein Rpi-blb2
NBS	PGSC0003DMG400004579	PGSC0003DMP400008094	NB-ARC,PF00931.23	'No_CC'	NBS-coding resistance gene analog
NBS	PGSC0003DMG400004756	PGSC0003DMP400008432	NB-ARC,PF00931.23	'No_CC'	Disease resistance protein
NBS	PGSC0003DMG400004873	PGSC0003DMP400008670	NB-ARC,PF00931.23	'No_CC'	Resistance protein PSH-RGH6
CC-NBS	PGSC0003DMG400004874	PGSC0003DMP400008671	NB-ARC,PF00931.23	'CC_region'	Resistance protein PSH-RGH7
NBS-LRR	PGSC0003DMG400005046	PGSC0003DMP400008990	NB-ARC,PF00931.23,Rx_N,PF18052.2,LRR_4,PF12799.8,LRR_8,PF13855.7	'No_CC'	Conserved gene of unknown function
NBS-LRR	PGSC0003DMG400005052	PGSC0003DMP400009000	NB-ARC,PF00931.23,Rx_N,PF18052.2,LRR_8,PF13855.7,LRR_4,PF12799.8	'No_CC'	Disease resistance protein RGA3
NBS	PGSC0003DMG400005170	PGSC0003DMP400009176	NB-ARC,PF00931.23	'No_CC'	NBS-coding resistance gene analog
NBS-LRR	PGSC0003DMG400005172	PGSC0003DMP400009178	NB-ARC,PF00931.23,LRR_4,PF12799.8	'No_CC'	NBS-coding resistance gene analog
NBS	PGSC0003DMG400005173	PGSC0003DMP400009180	NB-ARC,PF00931.23	'No_CC'	Tospovirus resistance protein A
NBS	PGSC0003DMG400005174	PGSC0003DMP400009181	NB-ARC,PF00931.23	'No_CC'	NBS-coding resistance gene analog
NBS-LRR	PGSC0003DMG400005970	PGSC0003DMP400010600	NB-ARC,PF00931.23,NB-LRR,PF12061.9,Rx_N,PF18052.2	'No_CC'	Late blight resistance protein
TIR-NBS-LRR	PGSC0003DMG400006003	PGSC0003DMP400010670	TIR,PF01582.21,NB-ARC,PF00931.23,TIR_2,PF13676.7,LRR_4,PF12799.8,LRR_8,PF13855.7,AAA_16,PF13191.7	'No_CC'	Nematode resistance
NBS-LRR	PGSC0003DMG400006296	PGSC0003DMP400011164	DUF313,PF03754.14,LRR_8,PF13855.7,LRR_4,PF12799.8	'No_CC'	Tospovirus resistance protein A
NBS	PGSC0003DMG400006297	PGSC0003DMP400011165	NB-ARC,PF00931.23	'No_CC'	Tospovirus resistance protein C
NBS-LRR	PGSC0003DMG400006316	PGSC0003DMP400011207	NB-ARC,PF00931.23,LRR_8,PF13855.7	'No_CC'	NBS-LRR type disease resistance protein
NBS	PGSC0003DMG400006531	PGSC0003DMP400011559	NB-ARC,PF00931.23,Rx_N,PF18052.2	'No_CC'	SNKR2GH5 protein
NBS	PGSC0003DMG400006533	PGSC0003DMP400011561	NB-ARC,PF00931.23,Rx_N,PF18052.2	'No_CC'	Rpi protein
NBS	PGSC0003DMG400006570	PGSC0003DMP400011612	NB-ARC,PF00931.23,AAA_22,PF13401.7	'No_CC'	Tospovirus resistance protein C
NBS-LRR	PGSC0003DMG400006572	PGSC0003DMP400011615	LRR_8,PF13855.7	'No_CC'	Tospovirus resistance protein B
NBS	PGSC0003DMG400006573	PGSC0003DMP400011616	NB-ARC,PF00931.23	'No_CC'	Tospovirus resistance protein A
NBS-LRR	PGSC0003DMG400006769	PGSC0003DMP400011969	NB-ARC,PF00931.23,Rx_N,PF18052.2,LRR_4,PF12799.8,LRR_8,PF13855.7	'No_CC'	Leucine-rich repeat containing protein
NBS-LRR	PGSC0003DMG400006785	PGSC0003DMP400011999	NB-ARC,PF00931.23,Rx_N,PF18052.2,LRR_8,PF13855.7,LRR_4,PF12799.8	'No_CC'	CC-NBS-LRR resistance protein
NBS	PGSC0003DMG400006800	PGSC0003DMP400012048	NB-ARC,PF00931.23	'No_CC'	NBS-LRR protein
NBS-LRR	PGSC0003DMG400007344	PGSC0003DMP400013002	NB-ARC,PF00931.23,Rx_N,PF18052.2,LRR_4,PF12799.8	'No_CC'	Disease resistance protein R3a
CC-NBS-LRR	PGSC0003DMG400007385	PGSC0003DMP400013075	NB-ARC,PF00931.23,LRR_8,PF13855.7,LRR_4,PF12799.8	'CC_region'	CC-NB-LRR protein
CC-NBS	PGSC0003DMG400007462	PGSC0003DMP400013228	NB-ARC,PF00931.23,Rx_N,PF18052.2	'CC_region'	NRC1
NBS	PGSC0003DMG400007469	PGSC0003DMP400013245	NB-ARC,PF00931.23,Rx_N,PF18052.2	'No_CC'	NRC1
NBS	PGSC0003DMG400007471	PGSC0003DMP400013246	NB-ARC,PF00931.23	'No_CC'	NRC1
NBS	PGSC0003DMG400007605	PGSC0003DMP400013460	NB-ARC,PF00931.23,Rx_N,PF18052.2	'No_CC'	NBS-LRR protein
NBS	PGSC0003DMG400007608	PGSC0003DMP400013462	Rx_N,PF18052.2,NB-ARC,PF00931.23	'No_CC'	Blight resistance protein RGA1
NBS	PGSC0003DMG400007742	PGSC0003DMP400013663	NB-ARC,PF00931.23	'No_CC'	NBS-coding resistance gene protein
TIR-NBS-LRR	PGSC0003DMG400007743	PGSC0003DMP400013664	NB-ARC,PF00931.23,TIR,PF01582.21,LRR_4,PF12799.8,TIR_2,PF13676.7,AAA_16,PF13191.7,LRR_8,PF13855.7,NACHT,PF05729.13,AAA_22,PF13401.7,AAA_18,PF13238.7,AAA_24,PF13479.7	'No_CC'	Tir-nbs-lrr resistance protein
NBS	PGSC0003DMG400007867	PGSC0003DMP400013860	NB-ARC,PF00931.23,AAA_16,PF13191.7	'No_CC'	Disease resistance protein Gpa2
NBS	PGSC0003DMG400007869	PGSC0003DMP400013863	NB-ARC,PF00931.23	'No_CC'	RGC1
NBS	PGSC0003DMG400007870	PGSC0003DMP400013864	NB-ARC,PF00931.23	'No_CC'	NBS-LRR protein
CC-NBS	PGSC0003DMG400007872	PGSC0003DMP400013873	NB-ARC,PF00931.23	'CC_region'	NBS-LRR protein
NBS	PGSC0003DMG400007999	PGSC0003DMP400014063	NB-ARC,PF00931.23,RPW8,PF05659.12	'No_CC'	Nbs-lrr resistance protein
NBS-LRR	PGSC0003DMG400008257	PGSC0003DMP400014485	NB-ARC,PF00931.23,LRR_4,PF12799.8,LRR_8,PF13855.7	'No_CC'	Cc-nbs-lrr resistance protein
NBS	PGSC0003DMG400008292	PGSC0003DMP400014543	NB-ARC,PF00931.23	'No_CC'	NBS-LRR resistance protein
NBS	PGSC0003DMG400008306	PGSC0003DMP400014565	NB-ARC,PF00931.23,Rx_N,PF18052.2,AAA_14,PF13173.7	'No_CC'	Nbs-lrr resistance protein
NBS-LRR	PGSC0003DMG400008393	PGSC0003DMP400014728	NB-ARC,PF00931.23,Rx_N,PF18052.2,AAA_22,PF13401.7,LRR_8,PF13855.7	'No_CC'	Cc-nbs-lrr resistance protein
NBS-LRR	PGSC0003DMG400008394	PGSC0003DMP400014731	NB-ARC,PF00931.23,Rx_N,PF18052.2,LRR_4,PF12799.8,LRR_8,PF13855.7	'No_CC'	Cc-nbs-lrr resistance protein
CC-NBS	PGSC0003DMG400008449	PGSC0003DMP400014827	NB-ARC,PF00931.23	'CC_region'	NBS-LRR resistance protein
NBS-LRR	PGSC0003DMG400008588	PGSC0003DMP400015090	NB-ARC,PF00931.23,Rx_N,PF18052.2,LRR_8,PF13855.7,LRR_4,PF12799.8	'No_CC'	Disease resistance protein RGA4
CC-NBS-LRR	PGSC0003DMG400008595	PGSC0003DMP400015103	NB-ARC,PF00931.23,Rx_N,PF18052.2,LRR_4,PF12799.8,LRR_8,PF13855.7,AAA_22,PF13401.7	'CC_region'	Cc-nbs-lrr resistance protein
NBS-LRR	PGSC0003DMG400008596	PGSC0003DMP400015106	NB-ARC,PF00931.23,Rx_N,PF18052.2,LRR_8,PF13855.7,LRR_4,PF12799.8,AAA_22,PF13401.7	'No_CC'	Cc-nbs-lrr resistance protein
NBS-LRR	PGSC0003DMG400009307	PGSC0003DMP400016423	LRR_8,PF13855.7,NB-ARC,PF00931.23,LRR_4,PF12799.8	'No_CC'	Blight resistance protein T118
NBS-LRR	PGSC0003DMG400009324	PGSC0003DMP400016465	NB-ARC,PF00931.23,LRR_8,PF13855.7,Rx_N,PF18052.2,LRR_4,PF12799.8	'No_CC'	Disease resistance protein RGA4
NBS-LRR	PGSC0003DMG400009455	PGSC0003DMP400016717	NB-ARC,PF00931.23,Rx_N,PF18052.2,LRR_4,PF12799.8,LRR_8,PF13855.7	'No_CC'	Disease resistance protein R3a
NBS-LRR	PGSC0003DMG400009633	PGSC0003DMP400017024	LRR_8,PF13855.7,NB-ARC,PF00931.23,LRR_4,PF12799.8	'No_CC'	N protein
TIR-NBS	PGSC0003DMG400009686	PGSC0003DMP400017113	TIR,PF01582.21,NB-ARC,PF00931.23,TIR_2,PF13676.7	'No_CC'	Bacterial spot disease resistance protein 4
NBS	PGSC0003DMG400010287	PGSC0003DMP400018174	RVT_2,PF07727.15,rve,PF00665.27	'No_CC'	Conserved gene of unknown function
TIR-NBS-LRR	PGSC0003DMG400010527	PGSC0003DMP400018619	TIR,PF01582.21,NB-ARC,PF00931.23,TIR_2,PF13676.7,LRR_4,PF12799.8	'No_CC'	Nematode resistance
CC-NBS	PGSC0003DMG400010612	PGSC0003DMP400018753	NB-ARC,PF00931.23,Rx_N,PF18052.2	'CC_region'	HJTR2GH1 protein
CC-NBS	PGSC0003DMG400010886	PGSC0003DMP400019235	NB-ARC,PF00931.23	'CC_region'	Cc-nbs-lrr resistance protein
NBS	PGSC0003DMG400010895	PGSC0003DMP400019250	NB-ARC,PF00931.23	'No_CC'	Late blight resistance protein Rpi-blb2
NBS	PGSC0003DMG400010944	PGSC0003DMP400019338	NB-ARC,PF00931.23,AAA_22,PF13401.7,NACHT,PF05729.13	'No_CC'	Cc-nbs-lrr resistance protein
NBS	PGSC0003DMG400010946	PGSC0003DMP400019342	Rx_N,PF18052.2,NB-ARC,PF00931.23	'No_CC'	EDNR2GH3 protein
NBS	PGSC0003DMG400010953	PGSC0003DMP400019349	NB-ARC,PF00931.23,AAA_22,PF13401.7	'No_CC'	Disease resistance protein RPS5
NBS-LRR	PGSC0003DMG400011045	PGSC0003DMP400019508	NB-ARC,PF00931.23,Rx_N,PF18052.2,LRR_8,PF13855.7,LRR_4,PF12799.8,AAA_22,PF13401.7	'No_CC'	Cc-nbs-lrr resistance protein
NBS	PGSC0003DMG400011109	PGSC0003DMP400019616	NB-ARC,PF00931.23,Rx_N,PF18052.2,AAA_22,PF13401.7	'No_CC'	CC-NBS-LRR resistance protein
NBS-LRR	PGSC0003DMG400011111	PGSC0003DMP400019629	NB-ARC,PF00931.23,LRR_4,PF12799.8	'No_CC'	Cc-nbs-lrr resistance protein
NBS	PGSC0003DMG400011115	PGSC0003DMP400019633	NB-ARC,PF00931.23,AAA_22,PF13401.7,AAA_16,PF13191.7	'No_CC'	Cc-nbs-lrr resistance protein
NBS	PGSC0003DMG400011425	PGSC0003DMP400020238	NB-ARC,PF00931.23	'No_CC'	Cc-nbs-lrr resistance protein
NBS	PGSC0003DMG400011517	PGSC0003DMP400020395	NB-ARC,PF00931.23,Rx_N,PF18052.2	'No_CC'	HJTR2GH1 protein
NBS-LRR	PGSC0003DMG400011520	PGSC0003DMP400020400	NB-ARC,PF00931.23,Rx_N,PF18052.2,LRR_8,PF13855.7	'No_CC'	Rpi protein
NBS	PGSC0003DMG400011521	PGSC0003DMP400020401	NB-ARC,PF00931.23,Rx_N,PF18052.2	'No_CC'	EDNR2GH5 protein
NBS	PGSC0003DMG400011523	PGSC0003DMP400020406	NB-ARC,PF00931.23,Rx_N,PF18052.2	'No_CC'	HJTR2GH1 protein
NBS	PGSC0003DMG400011524	PGSC0003DMP400020407	NB-ARC,PF00931.23	'No_CC'	EDNR2GH3 protein
CC-NBS	PGSC0003DMG400011525	PGSC0003DMP400020408	NB-ARC,PF00931.23,Rx_N,PF18052.2	'CC_region'	EDNR2GH4 protein
NBS	PGSC0003DMG400011527	PGSC0003DMP400020411	NB-ARC,PF00931.23,Rx_N,PF18052.2	'No_CC'	SNKR2GH5 protein
NBS	PGSC0003DMG400011528	PGSC0003DMP400020412	NB-ARC,PF00931.23,Rx_N,PF18052.2	'No_CC'	R2
NBS	PGSC0003DMG400011529	PGSC0003DMP400020413	NB-ARC,PF00931.23,Rx_N,PF18052.2	'No_CC'	R2
NBS	PGSC0003DMG400011809	PGSC0003DMP400020938	NB-ARC,PF00931.23,AAA_16,PF13191.7	'No_CC'	Disease resistance protein BS2
NBS	PGSC0003DMG400011898	PGSC0003DMP400021087	NB-ARC,PF00931.23	'No_CC'	Tospovirus resistance protein B
NBS-LRR	PGSC0003DMG400011900	PGSC0003DMP400021091	NB-ARC,PF00931.23,LRR_4,PF12799.8	'No_CC'	Tospovirus resistance protein B
NBS	PGSC0003DMG400011906	PGSC0003DMP400021098	NB-ARC,PF00931.23	'No_CC'	Tospovirus resistance protein D
NBS	PGSC0003DMG400011907	PGSC0003DMP400021099	NB-ARC,PF00931.23	'No_CC'	NBS-coding resistance gene analog
NBS	PGSC0003DMG400011920	PGSC0003DMP400021117	NB-ARC,PF00931.23	'No_CC'	SNKR2GH5 protein
NBS	PGSC0003DMG400011924	PGSC0003DMP400021121	NB-ARC,PF00931.23,Rx_N,PF18052.2	'No_CC'	SNKR2GH2 protein
NBS	PGSC0003DMG400011926	PGSC0003DMP400021125	NB-ARC,PF00931.23,Rx_N,PF18052.2	'No_CC'	Rpi protein
TIR-NBS	PGSC0003DMG400012335	PGSC0003DMP400021834	TIR_2,PF13676.7,NB-ARC,PF00931.23	'No_CC'	Tir-nbs resistance protein
CC-NBS-LRR	PGSC0003DMG400012466	PGSC0003DMP400022046	NB-ARC,PF00931.23,LRR_8,PF13855.7	'CC_region'	Conserved gene of unknown function
NBS-LRR	PGSC0003DMG400012470	PGSC0003DMP400022052	NB-ARC,PF00931.23,LRR_8,PF13855.7,LRR_4,PF12799.8	'No_CC'	Conserved gene of unknown function
CC-NBS-LRR	PGSC0003DMG400012471	PGSC0003DMP400022053	NB-ARC,PF00931.23,LRR_8,PF13855.7,LRR_4,PF12799.8,ATPase_2,PF01637.19	'CC_region'	Conserved gene of unknown function
CC-NBS-LRR	PGSC0003DMG400012472	PGSC0003DMP400022055	NB-ARC,PF00931.23,LRR_8,PF13855.7	'CC_region'	Disease resistance protein
NBS-LRR	PGSC0003DMG400012650	PGSC0003DMP400022408	NB-ARC,PF00931.23,LRR_8,PF13855.7	'No_CC'	TMV resistance protein N
NBS-LRR	PGSC0003DMG400012918	PGSC0003DMP400022879	NB-ARC,PF00931.23,Rx_N,PF18052.2,LRR_4,PF12799.8,LRR_8,PF13855.7	'No_CC'	Cc-nbs-lrr resistance protein
TIR-NBS-LRR	PGSC0003DMG400013090	PGSC0003DMP400023175	NB-ARC,PF00931.23,TIR,PF01582.21,LRR_8,PF13855.7,TIR_2,PF13676.7	'No_CC'	Leucine-rich repeat-containing protein
NBS	PGSC0003DMG400013091	PGSC0003DMP400023176	NB-ARC,PF00931.23	'No_CC'	Disease resistance protein Gpa2
NBS-LRR	PGSC0003DMG400013094	PGSC0003DMP400023183	NB-ARC,PF00931.23,LRR_8,PF13855.7	'No_CC'	Leucine-rich repeat-containing protein
TIR-NBS-LRR	PGSC0003DMG400013098	PGSC0003DMP400023191	TIR,PF01582.21,NB-ARC,PF00931.23,LRR_8,PF13855.7,TIR_2,PF13676.7,AAA_16,PF13191.7,AAA_22,PF13401.7	'No_CC'	TMV resistance protein N
CC-NBS	PGSC0003DMG400013165	PGSC0003DMP400023299	NB-ARC,PF00931.23,AAA_22,PF13401.7,AAA_18,PF13238.7	'CC_region'	Disease resistance protein RPS2
NBS-LRR	PGSC0003DMG400013308	PGSC0003DMP400023545	NB-ARC,PF00931.23,LRR_8,PF13855.7,AAA_16,PF13191.7,LRR_4,PF12799.8	'No_CC'	Nbs-lrr resistance protein
NBS	PGSC0003DMG400013407	PGSC0003DMP400023730	NB-ARC,PF00931.23	'No_CC'	CC-NBS-LRR class disease resistance protein
NBS	PGSC0003DMG400013486	PGSC0003DMP400023851	NB-ARC,PF00931.23,Rx_N,PF18052.2	'No_CC'	Disease resistance protein
CC-NBS	PGSC0003DMG400013490	PGSC0003DMP400023857	NB-ARC,PF00931.23,Rx_N,PF18052.2	'CC_region'	Prf
NBS-LRR	PGSC0003DMG400013506	PGSC0003DMP400023885	NB-LRR,PF12061.9,NB-ARC,PF00931.23	'No_CC'	Late blight resistance protein homolog R1B-16
TIR-NBS	PGSC0003DMG400013543	PGSC0003DMP400023970	TIR,PF01582.21,NB-ARC,PF00931.23,TIR_2,PF13676.7,AAA_16,PF13191.7	'No_CC'	NL27
TIR-NBS-LRR	PGSC0003DMG400013627	PGSC0003DMP400024105	TIR,PF01582.21,NB-ARC,PF00931.23,TIR_2,PF13676.7,LRR_8,PF13855.7,LRR_4,PF12799.8	'No_CC'	Tir-nbs-lrr resistance protein
NBS-LRR	PGSC0003DMG400013721	PGSC0003DMP400024260	NB-ARC,PF00931.23,LRR_4,PF12799.8,Rx_N,PF18052.2,LRR_8,PF13855.7,AAA_16,PF13191.7	'No_CC'	Plant disease resistant protein
NBS-LRR	PGSC0003DMG400013736	PGSC0003DMP400024285	NB-ARC,PF00931.23,LRR_8,PF13855.7,LRR_4,PF12799.8,AAA_16,PF13191.7	'No_CC'	BED finger-nbs-lrr resistance protein
NBS	PGSC0003DMG400013889	PGSC0003DMP400024495	NB-ARC,PF00931.23,MTS,PF05175.15,PrmA,PF06325.14,Methyltransf_31,PF13847.7,Methyltransf_25,PF13649.7	'No_CC'	Disease resistance protein Gpa2
NBS	PGSC0003DMG400013891	PGSC0003DMP400024502	NB-ARC,PF00931.23	'No_CC'	Resistance protein PSH-RGH6
NBS	PGSC0003DMG400013904	PGSC0003DMP400024524	NB-ARC,PF00931.23,AAA_16,PF13191.7	'No_CC'	Resistance protein PSH-RGH6
NBS	PGSC0003DMG400014047	PGSC0003DMP400024729	NB-ARC,PF00931.23,Rx_N,PF18052.2	'No_CC'	Disease resistance protein R3a
NBS	PGSC0003DMG400015031	PGSC0003DMP400026426	NB-ARC,PF00931.23	'No_CC'	Nucleotide binding site-leucine rich repeat protein
TIR-NBS	PGSC0003DMG400015128	PGSC0003DMP400026554	NB-ARC,PF00931.23,TIR,PF01582.21	'No_CC'	Leucine-rich repeat-containing protein
TIR-NBS-LRR	PGSC0003DMG400015681	PGSC0003DMP400027484	TIR,PF01582.21,NB-ARC,PF00931.23,LRR_8,PF13855.7,TIR_2,PF13676.7,LRR_4,PF12799.8	'No_CC'	Resistance gene
TIR-NBS	PGSC0003DMG400015693	PGSC0003DMP400027528	TIR,PF01582.21,NB-ARC,PF00931.23,TIR_2,PF13676.7	'No_CC'	Resistance gene
CC-NBS	PGSC0003DMG400015872	PGSC0003DMP400027811	NB-ARC,PF00931.23,Rx_N,PF18052.2,AAA_22,PF13401.7	'CC_region'	NBS-LRR type resistance protein
NBS	PGSC0003DMG400016029	PGSC0003DMP400028039	NB-ARC,PF00931.23,AAA_16,PF13191.7	'No_CC'	NBS-coding resistance gene analog
NBS	PGSC0003DMG400016372	PGSC0003DMP400028611	NB-ARC,PF00931.23	'No_CC'	Resistance protein PSH-RGH7
NBS-LRR	PGSC0003DMG400016600	PGSC0003DMP400029011	NB-ARC,PF00931.23,LRR_4,PF12799.8,LRR_8,PF13855.7	'No_CC'	Tospovirus resistance protein E
NBS	PGSC0003DMG400016601	PGSC0003DMP400029014	NB-ARC,PF00931.23,AAA_22,PF13401.7	'No_CC'	Tospovirus resistance protein A
NBS	PGSC0003DMG400016628	PGSC0003DMP400029088	NB-ARC,PF00931.23	'No_CC'	Tospovirus resistance protein C
NBS-LRR	PGSC0003DMG400016656	PGSC0003DMP400029135	NB-ARC,PF00931.23,LRR_8,PF13855.7,LRR_4,PF12799.8	'No_CC'	Disease resistance protein
NBS-LRR	PGSC0003DMG400016808	PGSC0003DMP400029365	LRR_8,PF13855.7,NB-ARC,PF00931.23,LRR_4,PF12799.8,LRR_1,PF00560.34,LRR_6,PF13516.7	'No_CC'	N protein
NBS	PGSC0003DMG400016823	PGSC0003DMP400029389	NB-ARC,PF00931.23	'No_CC'	Nucleotide binding site-leucine rich repeat protein
NBS-LRR	PGSC0003DMG400017060	PGSC0003DMP400029816	NB-ARC,PF00931.23,Rx_N,PF18052.2,LRR_8,PF13855.7,LRR_4,PF12799.8	'No_CC'	Disease resistance protein RGA1
NBS	PGSC0003DMG400017061	PGSC0003DMP400029817	NB-ARC,PF00931.23,AAA_16,PF13191.7	'No_CC'	Blight resistance protein SH10
NBS-LRR	PGSC0003DMG400017062	PGSC0003DMP400029818	NB-ARC,PF00931.23,Rx_N,PF18052.2,LRR_8,PF13855.7,LRR_4,PF12799.8	'No_CC'	Disease resistance protein RGA1
NBS-LRR	PGSC0003DMG400017146	PGSC0003DMP400029947	NB-ARC,PF00931.23,Rx_N,PF18052.2,LRR_8,PF13855.7,LRR_4,PF12799.8	'No_CC'	NBS-LRR resistance protein RGH1
TIR-NBS-LRR	PGSC0003DMG400017317	PGSC0003DMP400030257	TIR,PF01582.21,NB-ARC,PF00931.23,TIR_2,PF13676.7,LRR_4,PF12799.8,LRR_8,PF13855.7,NACHT,PF05729.13	'No_CC'	Nematode resistance
NBS-LRR	PGSC0003DMG400017666	PGSC0003DMP400030873	LRR_4,PF12799.8	'No_CC'	Disease resistance protein I2C-5
NBS	PGSC0003DMG400018046	PGSC0003DMP400031460	NB-ARC,PF00931.23	'No_CC'	NBS-coding resistance gene analog
NBS-LRR	PGSC0003DMG400018050	PGSC0003DMP400031465	NB-ARC,PF00931.23,Rx_N,PF18052.2,LRR_4,PF12799.8	'No_CC'	Disease resistance protein RGA1
TIR-NBS	PGSC0003DMG400018216	PGSC0003DMP400031726	TIR,PF01582.21,NB-ARC,PF00931.23,TIR_2,PF13676.7,AAA_22,PF13401.7	'No_CC'	TMV resistance protein N
TIR-NBS-LRR	PGSC0003DMG400018256	PGSC0003DMP400031803	NB-ARC,PF00931.23,TIR,PF01582.21,LRR_8,PF13855.7,TIR_2,PF13676.7	'No_CC'	TMV resistance protein N
TIR-NBS-LRR	PGSC0003DMG400018428	PGSC0003DMP400032104	TIR,PF01582.21,NB-ARC,PF00931.23,TIR_2,PF13676.7,LRR_8,PF13855.7,LRR_4,PF12799.8	'No_CC'	Bacterial spot disease resistance protein 4
TIR-NBS-LRR	PGSC0003DMG400018429	PGSC0003DMP400032105	TIR,PF01582.21,NB-ARC,PF00931.23,TIR_2,PF13676.7,LRR_8,PF13855.7,LRR_4,PF12799.8	'No_CC'	Bacterial spot disease resistance protein 4
NBS-LRR	PGSC0003DMG400018441	PGSC0003DMP400032127	NB-LRR,PF12061.9,NB-ARC,PF00931.23,LRR_8,PF13855.7	'No_CC'	Late blight resistance protein
NBS-LRR	PGSC0003DMG400018442	PGSC0003DMP400032128	NB-LRR,PF12061.9,NB-ARC,PF00931.23	'No_CC'	Late blight resistance protein
TIR-NBS-LRR	PGSC0003DMG400018461	PGSC0003DMP400032156	TIR,PF01582.21,NB-ARC,PF00931.23,LRR_4,PF12799.8,LRR_8,PF13855.7,TIR_2,PF13676.7	'CC_region'	Resistance gene
CC-NBS	PGSC0003DMG400018462	PGSC0003DMP400032157	NB-ARC,PF00931.23	'CC_region'	Disease resistance protein
NBS	PGSC0003DMG400018463	PGSC0003DMP400032163	NB-ARC,PF00931.23	'No_CC'	Disease resistance protein
CC-NBS	PGSC0003DMG400018464	PGSC0003DMP400032165	NB-ARC,PF00931.23	'CC_region'	Disease resistance protein
NBS-LRR	PGSC0003DMG400018490	PGSC0003DMP400032215	NB-ARC,PF00931.23,Rx_N,PF18052.2,LRR_4,PF12799.8,AAA_16,PF13191.7	'No_CC'	NBS-LRR type disease resistance protein
NBS-LRR	PGSC0003DMG400018570	PGSC0003DMP400032355	LRR_4,PF12799.8,NB-ARC,PF00931.23,LRR_8,PF13855.7	'No_CC'	Disease resistance protein R3a
NBS-LRR	PGSC0003DMG400018572	PGSC0003DMP400032357	LRR_4,PF12799.8,NB-ARC,PF00931.23,LRR_8,PF13855.7	'No_CC'	Disease resistance protein I2C-5
NBS	PGSC0003DMG400018573	PGSC0003DMP400032358	NB-ARC,PF00931.23	'No_CC'	Disease resistance protein R3a
NBS	PGSC0003DMG400018619	PGSC0003DMP400032442	NB-ARC,PF00931.23,Rx_N,PF18052.2	'No_CC'	Tospovirus resistance protein B
CC-NBS	PGSC0003DMG400018693	PGSC0003DMP400032587	NB-ARC,PF00931.23,Rx_N,PF18052.2,AAA_16,PF13191.7	'CC_region'	Disease resistance protein I2
NBS	PGSC0003DMG400018903	PGSC0003DMP400032935	NB-ARC,PF00931.23	'No_CC'	Cc-nbs-lrr resistance protein
NBS	PGSC0003DMG400018907	PGSC0003DMP400032940	NB-ARC,PF00931.23	'No_CC'	NBS-coding resistance gene analog
NBS	PGSC0003DMG400018954	PGSC0003DMP400032997	NB-ARC,PF00931.23	'No_CC'	Late blight resistance protein Rpi-blb2
CC-NBS-LRR	PGSC0003DMG400019083	PGSC0003DMP400033168	NB-ARC,PF00931.23,LRR_8,PF13855.7,AAA_22,PF13401.7	'CC_region'	Conserved gene of unknown function
NBS-LRR	PGSC0003DMG400019418	PGSC0003DMP400033741	NB-ARC,PF00931.23,LRR_4,PF12799.8,Rx_N,PF18052.2,LRR_8,PF13855.7,AAA_22,PF13401.7	'No_CC'	Cc-nbs-lrr resistance protein
NBS	PGSC0003DMG400019627	PGSC0003DMP400034098	NB-ARC,PF00931.23,AAA_14,PF13173.7	'No_CC'	Disease resistance protein Gpa2
CC-NBS-LRR	PGSC0003DMG400019669	PGSC0003DMP400034188	NB-ARC,PF00931.23,Rx_N,PF18052.2,LRR_4,PF12799.8	'CC_region'	Potato resistance I2GA-SH23-3
NBS	PGSC0003DMG400019732	PGSC0003DMP400034296	NB-ARC,PF00931.23	'No_CC'	Disease resistance protein
NBS	PGSC0003DMG400019740	PGSC0003DMP400034307	NB-ARC,PF00931.23	'No_CC'	Disease resistance protein
CC-NBS	PGSC0003DMG400019741	PGSC0003DMP400034308	NB-ARC,PF00931.23,Rx_N,PF18052.2	'CC_region'	NRC1
NBS	PGSC0003DMG400019799	PGSC0003DMP400034394	NB-ARC,PF00931.23	'No_CC'	Blight resistance protein SH10
NBS-LRR	PGSC0003DMG400019803	PGSC0003DMP400034399	NB-ARC,PF00931.23,LRR_4,PF12799.8,LRR_8,PF13855.7	'No_CC'	NBS-LRR resistance protein
NBS	PGSC0003DMG400019804	PGSC0003DMP400034400	NB-ARC,PF00931.23,Rx_N,PF18052.2,AAA_16,PF13191.7	'No_CC'	Disease resistance protein RGA2
NBS-LRR	PGSC0003DMG400019900	PGSC0003DMP400034552	LRR_8,PF13855.7,LRR_4,PF12799.8	'No_CC'	Disease resistance protein RGA4
NBS	PGSC0003DMG400019913	PGSC0003DMP400034571	NB-ARC,PF00931.23,Rx_N,PF18052.2	'No_CC'	Tm-2
NBS	PGSC0003DMG400019970	PGSC0003DMP400034657	NB-ARC,PF00931.23	'No_CC'	RGC1
NBS	PGSC0003DMG400020584	PGSC0003DMP400035771	NB-ARC,PF00931.23,Rx_N,PF18052.2	'No_CC'	Rpi-vnt1
NBS	PGSC0003DMG400020586	PGSC0003DMP400035778	NB-ARC,PF00931.23,Rx_N,PF18052.2,AAA_22,PF13401.7	'No_CC'	Late blight resistance protein
NBS	PGSC0003DMG400020587	PGSC0003DMP400035779	NB-ARC,PF00931.23,Rx_N,PF18052.2,AAA_22,PF13401.7	'No_CC'	Rpi-vnt1
TIR-NBS-LRR	PGSC0003DMG400020722	PGSC0003DMP400036044	TIR,PF01582.21,NB-ARC,PF00931.23,TIR_2,PF13676.7,LRR_8,PF13855.7,LRR_4,PF12799.8	'No_CC'	TMV resistance protein N
NBS	PGSC0003DMG400020732	PGSC0003DMP400036055	NB-ARC,PF00931.23	'No_CC'	NBS-LRR resistance protein
NBS	PGSC0003DMG400020735	PGSC0003DMP400036056	NB-ARC,PF00931.23	'No_CC'	Root-knot nematode resistance protein
NBS	PGSC0003DMG400020736	PGSC0003DMP400036057	NB-ARC,PF00931.23	'No_CC'	Late blight resistance protein Rpi-blb2
CC-NBS	PGSC0003DMG400020740	PGSC0003DMP400036061	NB-ARC,PF00931.23	'CC_region'	NBS-LRR resistance protein
NBS	PGSC0003DMG400020741	PGSC0003DMP400036062	NB-ARC,PF00931.23	'No_CC'	Late blight resistance protein Rpi-blb2
NBS	PGSC0003DMG400020749	PGSC0003DMP400036070	NB-ARC,PF00931.23	'No_CC'	NBS-LRR resistance protein
NBS	PGSC0003DMG400020851	PGSC0003DMP400036237	NB-ARC,PF00931.23	'No_CC'	Tospovirus resistance protein D
NBS	PGSC0003DMG400020872	PGSC0003DMP400036267	NB-ARC,PF00931.23	'No_CC'	Tospovirus resistance protein C
TIR-NBS-LRR	PGSC0003DMG400020935	PGSC0003DMP400036348	TIR,PF01582.21,NB-ARC,PF00931.23,TIR_2,PF13676.7,LRR_8,PF13855.7,LRR_4,PF12799.8	'No_CC'	Tir-nbs-lrr resistance protein
NBS-LRR	PGSC0003DMG400021098	PGSC0003DMP400036563	NB-ARC,PF00931.23,Rx_N,PF18052.2,LRR_4,PF12799.8,LRR_8,PF13855.7	'No_CC'	Nbs-lrr resistance protein
NBS	PGSC0003DMG400021169	PGSC0003DMP400036704	NB-ARC,PF00931.23	'No_CC'	Disease resistance protein
NBS-LRR	PGSC0003DMG400021469	PGSC0003DMP400037208	NB-ARC,PF00931.23,LRR_8,PF13855.7,LRR_4,PF12799.8	'No_CC'	Nbs-lrr resistance protein
CC-NBS	PGSC0003DMG400021477	PGSC0003DMP400037237	NB-ARC,PF00931.23	'CC_region'	Cc-nbs-lrr resistance protein
NBS-LRR	PGSC0003DMG400021779	PGSC0003DMP400037734	NB-ARC,PF00931.23,LRR_4,PF12799.8,LRR_8,PF13855.7,AAA_22,PF13401.7	'No_CC'	Cc-nbs-lrr resistance protein
NBS	PGSC0003DMG400021861	PGSC0003DMP400037869	NB-ARC,PF00931.23,Rx_N,PF18052.2	'No_CC'	NRC1
NBS	PGSC0003DMG400021862	PGSC0003DMP400037872	NB-ARC,PF00931.23	'No_CC'	Disease resistance protein
NBS	PGSC0003DMG400021863	PGSC0003DMP400037873	NB-ARC,PF00931.23	'No_CC'	Nucleotide binding site-leucine rich repeat protein
TIR-NBS-LRR	PGSC0003DMG400021887	PGSC0003DMP400037911	TIR,PF01582.21,NB-ARC,PF00931.23,TIR_2,PF13676.7,LRR_4,PF12799.8,LRR_8,PF13855.7,NACHT,PF05729.13,AAA_16,PF13191.7	'No_CC'	Bacterial spot disease resistance protein 4
CC-NBS-LRR	PGSC0003DMG400021948	PGSC0003DMP400038006	NB-ARC,PF00931.23,LRR_8,PF13855.7	'CC_region'	Cc-nbs-lrr resistance protein
NBS	PGSC0003DMG400021986	PGSC0003DMP400038047	NB-ARC,PF00931.23	'No_CC'	Late blight resistance protein Rpi-blb2
NBS	PGSC0003DMG400022004	PGSC0003DMP400038073	NB-ARC,PF00931.23	'No_CC'	Disease resistance protein RGA1
NBS	PGSC0003DMG400022087	PGSC0003DMP400038184	NB-ARC,PF00931.23	'No_CC'	Nucleotide binding site-leucine rich repeat protein
TIR-NBS-LRR	PGSC0003DMG400022699	PGSC0003DMP400039354	TIR,PF01582.21,NB-ARC,PF00931.23,LRR_8,PF13855.7,LRR_4,PF12799.8,TIR_2,PF13676.7	'No_CC'	Resistance gene
NBS	PGSC0003DMG400022785	PGSC0003DMP400039503	NB-ARC,PF00931.23,AAA_16,PF13191.7,AAA_14,PF13173.7	'No_CC'	Resistance protein PSH-RGH6
NBS	PGSC0003DMG400022980	PGSC0003DMP400039844	NB-ARC,PF00931.23,Metallophos,PF00149.29	'No_CC'	Hydrolase
NBS	PGSC0003DMG400022989	PGSC0003DMP400039856	NB-ARC,PF00931.23	'No_CC'	N protein
NBS-LRR	PGSC0003DMG400023062	PGSC0003DMP400039962	NB-LRR,PF12061.9,NB-ARC,PF00931.23	'No_CC'	Disease resistance protein
NBS	PGSC0003DMG400023249	PGSC0003DMP400040216	NB-ARC,PF00931.23	'No_CC'	NBS-LRR resistance protein
NBS	PGSC0003DMG400023250	PGSC0003DMP400040217	NB-ARC,PF00931.23	'No_CC'	NBS-LRR resistance protein
NBS	PGSC0003DMG400023253	PGSC0003DMP400040218	NB-ARC,PF00931.23	'No_CC'	NBS-LRR resistance protein
NBS	PGSC0003DMG400023273	PGSC0003DMP400040250	NB-ARC,PF00931.23,Rx_N,PF18052.2	'No_CC'	HJTR2GH1 protein
NBS	PGSC0003DMG400023288	PGSC0003DMP400040271	NB-ARC,PF00931.23,Rx_N,PF18052.2	'No_CC'	Rpi protein
NBS	PGSC0003DMG400023645	PGSC0003DMP400040909	NB-ARC,PF00931.23	'No_CC'	Disease resistance protein BS2
NBS	PGSC0003DMG400023656	PGSC0003DMP400040920	NB-ARC,PF00931.23	'No_CC'	Resistance protein PSH-RGH6
TIR-NBS-LRR	PGSC0003DMG400024055	PGSC0003DMP400041617	TIR,PF01582.21,NB-ARC,PF00931.23,TIR_2,PF13676.7,LRR_8,PF13855.7,LRR_4,PF12799.8	'No_CC'	Nematode resistance
NBS	PGSC0003DMG400024202	PGSC0003DMP400041847	NB-ARC,PF00931.23	'No_CC'	Disease resistance protein BS2
NBS	PGSC0003DMG400024203	PGSC0003DMP400041848	NB-ARC,PF00931.23	'No_CC'	Disease resistance protein BS2
TIR-NBS	PGSC0003DMG400024206	PGSC0003DMP400041857	TIR,PF01582.21,NB-ARC,PF00931.23,TIR_2,PF13676.7	'No_CC'	N protein
NBS	PGSC0003DMG400024231	PGSC0003DMP400041925	NB-ARC,PF00931.23,Rx_N,PF18052.2	'No_CC'	EDNR2GH7 protein
NBS	PGSC0003DMG400024234	PGSC0003DMP400041928	Rx_N,PF18052.2	'No_CC'	SNKR2GH5 protein
NBS	PGSC0003DMG400024273	PGSC0003DMP400041993	NB-ARC,PF00931.23	'No_CC'	Resistance protein PSH-RGH6
NBS	PGSC0003DMG400024337	PGSC0003DMP400042115	NB-ARC,PF00931.23	'No_CC'	Hero resistance protein 2 homologue
NBS	PGSC0003DMG400024363	PGSC0003DMP400042153	NB-ARC,PF00931.23,Rx_N,PF18052.2,AAA_22,PF13401.7	'No_CC'	Rpi-vnt1
NBS	PGSC0003DMG400024365	PGSC0003DMP400042156	NB-ARC,PF00931.23,Rx_N,PF18052.2,AAA_22,PF13401.7	'No_CC'	Rpi-vnt1
NBS	PGSC0003DMG400024429	PGSC0003DMP400042250	NB-ARC,PF00931.23,AAA_22,PF13401.7	'No_CC'	NBS-coding resistance gene analog
NBS	PGSC0003DMG400024430	PGSC0003DMP400042254	NB-ARC,PF00931.23,Rx_N,PF18052.2	'No_CC'	Disease resistance protein BS2
CC-NBS-LRR	PGSC0003DMG400025099	PGSC0003DMP400043545	NB-ARC,PF00931.23,NB-LRR,PF12061.9,Rx_N,PF18052.2,AAA_22,PF13401.7	'CC_region'	PRF
NBS-LRR	PGSC0003DMG400025259	PGSC0003DMP400043841	NB-ARC,PF00931.23,Rx_N,PF18052.2,LRR_8,PF13855.7	'No_CC'	NBS-LRR type disease resistance protein
NBS	PGSC0003DMG400025511	PGSC0003DMP400044252	NB-ARC,PF00931.23	'No_CC'	Plant resistance protein
NBS	PGSC0003DMG400025512	PGSC0003DMP400044254	NB-ARC,PF00931.23	'No_CC'	Late blight resistance protein Rpi-blb2
NBS-LRR	PGSC0003DMG400025545	PGSC0003DMP400044306	NB-ARC,PF00931.23,NB-LRR,PF12061.9	'No_CC'	Late blight resistance protein homolog R1B-23
NBS-LRR	PGSC0003DMG400025611	PGSC0003DMP400044376	NB-ARC,PF00931.23,NB-LRR,PF12061.9,Rx_N,PF18052.2,LRR_4,PF12799.8	'No_CC'	Disease resistance protein
NBS	PGSC0003DMG400025615	PGSC0003DMP400044385	NB-ARC,PF00931.23	'No_CC'	Disease resistance protein
NBS-LRR	PGSC0003DMG400025683	PGSC0003DMP400044490	NB-ARC,PF00931.23,LRR_8,PF13855.7,LRR_4,PF12799.8	'No_CC'	Cc-nbs-lrr resistance protein
TIR-NBS	PGSC0003DMG400026104	PGSC0003DMP400045297	TIR,PF01582.21,NB-ARC,PF00931.23,TIR_2,PF13676.7	'No_CC'	NBS-coding resistance gene protein
CC-NBS	PGSC0003DMG400026161	PGSC0003DMP400045393	NB-ARC,PF00931.23,Rx_N,PF18052.2	'CC_region'	NBS-LRR type disease resistance protein
CC-NBS	PGSC0003DMG400026187	PGSC0003DMP400045441	NB-ARC,PF00931.23,Rx_N,PF18052.2	'CC_region'	Nbs-lrr resistance protein
TIR-NBS	PGSC0003DMG400026433	PGSC0003DMP400045909	TIR,PF01582.21,NB-ARC,PF00931.23,TIR_2,PF13676.7,AAA_16,PF13191.7	'No_CC'	ATP binding protein
NBS	PGSC0003DMG400026573	PGSC0003DMP400046174	NB-ARC,PF00931.23	'No_CC'	Resistance protein PSH-RGH6
NBS-LRR	PGSC0003DMG400026666	PGSC0003DMP400046327	Glycolytic,PF00274.20,NB-ARC,PF00931.23,Rx_N,PF18052.2,LRR_8,PF13855.7,LRR_4,PF12799.8,AAA_22,PF13401.7	'No_CC'	Cc-nbs-lrr resistance protein
NBS-LRR	PGSC0003DMG400027325	PGSC0003DMP400047516	NB-ARC,PF00931.23,LRR_8,PF13855.7,LRR_4,PF12799.8	'No_CC'	BED finger-nbs-lrr resistance protein
NBS-LRR	PGSC0003DMG400027377	PGSC0003DMP400047610	Rx_N,PF18052.2,LRR_4,PF12799.8,NB-ARC,PF00931.23	'No_CC'	Disease resistance protein R3a
CC-NBS-LRR	PGSC0003DMG400027407	PGSC0003DMP400047676	NB-ARC,PF00931.23,Rx_N,PF18052.2,LRR_4,PF12799.8,LRR_8,PF13855.7,AAA_16,PF13191.7	'CC_region'	Plant disease resistant protein
NBS-LRR	PGSC0003DMG400027409	PGSC0003DMP400047677	NB-ARC,PF00931.23,LRR_4,PF12799.8,LRR_8,PF13855.7	'No_CC'	CC-NBS-LRR protein
TIR-NBS-LRR	PGSC0003DMG400027797	PGSC0003DMP400048338	TIR,PF01582.21,NB-ARC,PF00931.23,TIR_2,PF13676.7,LRR_8,PF13855.7,LRR_4,PF12799.8	'No_CC'	TIR-NBS-LRR disease resistance
NBS	PGSC0003DMG400027867	PGSC0003DMP400048459	NB-ARC,PF00931.23	'No_CC'	Resistance protein PSH-RGH7
NBS	PGSC0003DMG400027932	PGSC0003DMP400048563	NB-ARC,PF00931.23	'No_CC'	NL27
NBS-LRR	PGSC0003DMG400028001	PGSC0003DMP400048658	NB-ARC,PF00931.23,Rx_N,PF18052.2,LRR_4,PF12799.8,LRR_8,PF13855.7,AAA_22,PF13401.7,NACHT,PF05729.13	'No_CC'	Cc-nbs-lrr resistance protein
NBS	PGSC0003DMG400028056	PGSC0003DMP400048746	NB-ARC,PF00931.23	'No_CC'	Disease resistance protein RPS2
NBS	PGSC0003DMG400028081	PGSC0003DMP400048785	NB-ARC,PF00931.23,AAA_22,PF13401.7,AAA_18,PF13238.7	'No_CC'	Cc-nbs-lrr resistance protein
NBS-LRR	PGSC0003DMG400028339	PGSC0003DMP400049280	NB-LRR,PF12061.9,NB-ARC,PF00931.23,AAA_22,PF13401.7	'No_CC'	Late blight resistance protein
CC-NBS	PGSC0003DMG400029313	PGSC0003DMP400051041	NB-ARC,PF00931.23,AAA_22,PF13401.7	'CC_region'	R2 protein
NBS	PGSC0003DMG400029314	PGSC0003DMP400051042	NB-ARC,PF00931.23,AAA_22,PF13401.7,Rx_N,PF18052.2	'No_CC'	Disease resistance protein RPM1
NBS	PGSC0003DMG400029344	PGSC0003DMP400051091	NB-ARC,PF00931.23,Rx_N,PF18052.2	'No_CC'	Disease resistance protein RPP13
NBS	PGSC0003DMG400029405	PGSC0003DMP400051212	NB-ARC,PF00931.23,AAA_22,PF13401.7	'No_CC'	Disease resistance protein RPM1
TIR-NBS-LRR	PGSC0003DMG400029415	PGSC0003DMP400051226	TIR,PF01582.21,NB-ARC,PF00931.23,TIR_2,PF13676.7,LRR_4,PF12799.8,LRR_8,PF13855.7	'No_CC'	Nematode resistance protein
NBS	PGSC0003DMG400029453	PGSC0003DMP400051307	NB-ARC,PF00931.23	'No_CC'	Hero resistance protein 1 homologue
NBS	PGSC0003DMG400029457	PGSC0003DMP400051313	NB-ARC,PF00931.23,AAA_22,PF13401.7	'No_CC'	Hero resistance protein
NBS	PGSC0003DMG400029460	PGSC0003DMP400051316	NB-ARC,PF00931.23	'No_CC'	Hero resistance protein
NBS	PGSC0003DMG400029462	PGSC0003DMP400051319	NB-ARC,PF00931.23,AAA_22,PF13401.7	'No_CC'	Hero resistance protein 1 homologue
NBS	PGSC0003DMG400029504	PGSC0003DMP400051394	NB-ARC,PF00931.23,AAA_22,PF13401.7	'No_CC'	Hero resistance protein
NBS	PGSC0003DMG400029505	PGSC0003DMP400051395	NB-ARC,PF00931.23,Rx_N,PF18052.2	'No_CC'	NRC1
NBS	PGSC0003DMG400029506	PGSC0003DMP400051396	NB-ARC,PF00931.23,AAA_22,PF13401.7	'No_CC'	Hero resistance protein
NBS	PGSC0003DMG400029586	PGSC0003DMP400051523	NB-ARC,PF00931.23	'No_CC'	Resistance protein PSH-RGH6
NBS-LRR	PGSC0003DMG400029590	PGSC0003DMP400051526	NB-ARC,PF00931.23,LRR_8,PF13855.7,LRR_4,PF12799.8	'No_CC'	Disease resistance protein RGA3
NBS	PGSC0003DMG400029606	PGSC0003DMP400051562	NB-ARC,PF00931.23	'No_CC'	Disease resistance protein RGA2
NBS	PGSC0003DMG400030044	PGSC0003DMP400052327	Rx_N,PF18052.2,NB-ARC,PF00931.23	'No_CC'	HJTR2GH1 protein
NBS	PGSC0003DMG400030045	PGSC0003DMP400052328	NB-ARC,PF00931.23	'No_CC'	EDNR2GH5 protein
NBS-LRR	PGSC0003DMG400030238	PGSC0003DMP400052643	NB-ARC,PF00931.23,LRR_4,PF12799.8	'No_CC'	CC-NBS-LRR protein
NBS-LRR	PGSC0003DMG400030239	PGSC0003DMP400052645	LRR_4,PF12799.8	'No_CC'	CC-NBS-LRR protein
TIR-NBS-LRR	PGSC0003DMG400030267	PGSC0003DMP400052688	LRR_8,PF13855.7,LRR_4,PF12799.8,TIR,PF01582.21	'No_CC'	Bacterial spot disease resistance protein 4
NBS	PGSC0003DMG400030497	PGSC0003DMP400053060	NB-ARC,PF00931.23,Rx_N,PF18052.2	'No_CC'	Resistance protein PSH-RGH6
NBS	PGSC0003DMG400030498	PGSC0003DMP400053061	NB-ARC,PF00931.23	'No_CC'	Disease resistance protein BS2
NBS-LRR	PGSC0003DMG400030855	PGSC0003DMP400053750	NB-ARC,PF00931.23,LRR_8,PF13855.7,Rx_N,PF18052.2,LRR_4,PF12799.8	'No_CC'	Disease resistance protein RGA1
NBS	PGSC0003DMG400031185	PGSC0003DMP400054328	NB-ARC,PF00931.23	'No_CC'	Tospovirus resistance protein C
TIR-NBS	PGSC0003DMG400031318	PGSC0003DMP400054560	TIR,PF01582.21,NB-ARC,PF00931.23,TIR_2,PF13676.7	'No_CC'	Tir-nbs-lrr resistance protein
NBS	PGSC0003DMG400031405	PGSC0003DMP400054697	NB-ARC,PF00931.23,Rx_N,PF18052.2	'No_CC'	NRC1
NBS	PGSC0003DMG400031521	PGSC0003DMP400054858	NB-ARC,PF00931.23	'No_CC'	Tospovirus resistance protein B
NBS	PGSC0003DMG400031878	PGSC0003DMP400055156	NB-ARC,PF00931.23	'No_CC'	NBS-LRR resistance protein
NBS	PGSC0003DMG400032572	PGSC0003DMP400055636	NB-ARC,PF00931.23,Rx_N,PF18052.2	'No_CC'	EDNR2GH7 protein
NBS	PGSC0003DMG400032576	PGSC0003DMP400055639	NB-ARC,PF00931.23,Rx_N,PF18052.2	'No_CC'	Rpi protein
NBS	PGSC0003DMG400032578	PGSC0003DMP400055640	NB-ARC,PF00931.23	'No_CC'	HJTR2GH1 protein
NBS	PGSC0003DMG400032580	PGSC0003DMP400055641	NB-ARC,PF00931.23	'No_CC'	EDNR2GH5 protein
NBS	PGSC0003DMG400032581	PGSC0003DMP400055642	NB-ARC,PF00931.23	'No_CC'	EDNR2GH5 protein
NBS	PGSC0003DMG400032582	PGSC0003DMP400055643	NB-ARC,PF00931.23,Rx_N,PF18052.2	'No_CC'	HJTR2GH1 protein
NBS	PGSC0003DMG400032584	PGSC0003DMP400055644	NB-ARC,PF00931.23	'No_CC'	R2 late blight resistance protein
NBS	PGSC0003DMG400033131	PGSC0003DMP400055904	NB-ARC,PF00931.23	'No_CC'	Tospovirus resistance protein E
NBS	PGSC0003DMG400033151	PGSC0003DMP400055937	NB-ARC,PF00931.23	'No_CC'	NBS-coding resistance gene analog
NBS-LRR	PGSC0003DMG400033153	PGSC0003DMP400055939	NB-ARC,PF00931.23,LRR_4,PF12799.8	'No_CC'	Tospovirus resistance protein C
NBS	PGSC0003DMG400033159	PGSC0003DMP400055942	NB-ARC,PF00931.23	'No_CC'	NL25
NBS	PGSC0003DMG400033160	PGSC0003DMP400055943	NB-ARC,PF00931.23	'No_CC'	TMV resistance protein N
NBS	PGSC0003DMG400033161	PGSC0003DMP400055944	NB-ARC,PF00931.23	'No_CC'	NL25
NBS-LRR	PGSC0003DMG400033334	PGSC0003DMP400055979	NB-ARC,PF00931.23,LRR_8,PF13855.7,LRR_4,PF12799.8,AAA_16,PF13191.7,NACHT,PF05729.13	'No_CC'	Bacterial spot disease resistance protein 4
CC-NBS-LRR	PGSC0003DMG400033651	PGSC0003DMP400056156	NB-ARC,PF00931.23,Rx_N,PF18052.2,LRR_4,PF12799.8,LRR_8,PF13855.7	'CC_region'	Nbs-lrr resistance protein
NBS	PGSC0003DMG400034825	PGSC0003DMP400056929	NB-ARC,PF00931.23	'No_CC'	NBS-LRR resistance protein
NBS	PGSC0003DMG400035467	PGSC0003DMP400057571	NB-ARC,PF00931.23	'No_CC'	Disease resistance protein RGA2
NBS-LRR	PGSC0003DMG400037159	PGSC0003DMP400059263	NB-ARC,PF00931.23,LRR_8,PF13855.7,LRR_4,PF12799.8	'No_CC'	Leucine-rich repeat containing protein
NBS	PGSC0003DMG400038020	PGSC0003DMP400060124	NB-ARC,PF00931.23	'No_CC'	Disease resistance protein BS2
NBS	PGSC0003DMG400038440	PGSC0003DMP400060544	NB-ARC,PF00931.23	'No_CC'	Tospovirus resistance protein D
NBS-LRR	PGSC0003DMG400041458	PGSC0003DMP400063562	NB-ARC,PF00931.23,LRR_8,PF13855.7,LRR_4,PF12799.8	'No_CC'	Leucine-rich repeat containing protein
NBS	PGSC0003DMG400042556	PGSC0003DMP400064660	NB-ARC,PF00931.23	'No_CC'	NBS domain resistance protein
NBS	PGSC0003DMG400042937	PGSC0003DMP400065041	NB-ARC,PF00931.23	'No_CC'	Resistance protein PSH-RGH6
NBS	PGSC0003DMG400043186	PGSC0003DMP400065290	NB-ARC,PF00931.23	'No_CC'	Tospovirus resistance protein A
CC-NBS-LRR	PGSC0003DMG400043400	PGSC0003DMP400065504	NB-ARC,PF00931.23,LRR_4,PF12799.8,LRR_8,PF13855.7	'CC_region'	Disease resistance protein RGA2
NBS	PGSC0003DMG400043650	PGSC0003DMP400065754	NB-ARC,PF00931.23	'No_CC'	NBS-LRR resistance protein
NBS-LRR	PGSC0003DMG400044423	PGSC0003DMP400066527	NB-ARC,PF00931.23,Rx_N,PF18052.2,LRR_8,PF13855.7,NACHT,PF05729.13,AAA_14,PF13173.7	'No_CC'	NBS-LRR type disease resistance protein
TIR-NBS	PGSC0003DMG400044837	PGSC0003DMP400066941	TIR,PF01582.21,NB-ARC,PF00931.23,AAA_16,PF13191.7	'No_CC'	Nematode resistance
NBS	PGSC0003DMG400046201	PGSC0003DMP400068305	NB-ARC,PF00931.23	'No_CC'	Tomato spotted wilt virus resistance protein
NBS	PGSC0003DMG400046545	PGSC0003DMP400068649	NB-ARC,PF00931.23	'No_CC'	Nbs-lrr resistance protein
NBS	PGSC0003DMG400046546	PGSC0003DMP400068650	NB-ARC,PF00931.23	'No_CC'	Tir-nbs resistance protein
NBS	PGSC0003DMG401001984	PGSC0003DMP400003562	NB-ARC,PF00931.23	'No_CC'	Disease resistance protein BS2
CC-NBS	PGSC0003DMG401002242	PGSC0003DMP400004003	NB-ARC,PF00931.23	'CC_region'	Disease resistance protein BS2
CC-NBS	PGSC0003DMG401003025	PGSC0003DMP400005435	NB-ARC,PF00931.23,NACHT,PF05729.13	'CC_region'	Conserved gene of unknown function
NBS-LRR	PGSC0003DMG401004423	PGSC0003DMP400007855	NB-ARC,PF00931.23,Rx_N,PF18052.2,LRR_4,PF12799.8,LRR_8,PF13855.7	'No_CC'	Cc-nbs-lrr resistance protein
NBS	PGSC0003DMG401005337	PGSC0003DMP400009454	NB-ARC,PF00931.23	'No_CC'	Late blight resistance protein Rpi-blb2
NBS	PGSC0003DMG401007461	PGSC0003DMP400013227	NB-ARC,PF00931.23,Rx_N,PF18052.2	'No_CC'	NRC1
NBS-LRR	PGSC0003DMG401007575	PGSC0003DMP400013400	NB-ARC,PF00931.23,AAA_22,PF13401.7,LRR_8,PF13855.7,NACHT,PF05729.13	'No_CC'	Cc-nbs-lrr resistance protein
NBS-LRR	PGSC0003DMG401007609	PGSC0003DMP400013463	LRR_4,PF12799.8,LRR_8,PF13855.7,NB-ARC,PF00931.23	'No_CC'	NBS-LRR resistance protein
NBS-LRR	PGSC0003DMG401007871	PGSC0003DMP400013865	NB-ARC,PF00931.23,LRR_4,PF12799.8	'No_CC'	NBS-LRR protein
CC-NBS	PGSC0003DMG401008349	PGSC0003DMP400014641	NB-ARC,PF00931.23,AAA_22,PF13401.7,NACHT,PF05729.13	'CC_region'	Cc-nbs-lrr resistance protein
NBS	PGSC0003DMG401008383	PGSC0003DMP400014709	Rx_N,PF18052.2,NB-ARC,PF00931.23	'No_CC'	Leucine-rich repeat containing protein
NBS-LRR	PGSC0003DMG401009305	PGSC0003DMP400016417	NB-ARC,PF00931.23,Rx_N,PF18052.2,LRR_8,PF13855.7,LRR_4,PF12799.8	'No_CC'	Disease resistance protein RGA3
NBS	PGSC0003DMG401009818	PGSC0003DMP400017324	NB-ARC,PF00931.23	'No_CC'	Disease resistance protein BS2
NBS	PGSC0003DMG401009819	PGSC0003DMP400017331	NB-ARC,PF00931.23	'No_CC'	Resistance protein PSH-RGH6
CC-NBS	PGSC0003DMG401010614	PGSC0003DMP400018755	NB-ARC,PF00931.23,Rx_N,PF18052.2	'CC_region'	R2
NBS-LRR	PGSC0003DMG401010943	PGSC0003DMP400019328	LRR_4,PF12799.8,LRR_8,PF13855.7	'No_CC'	Nbs-lrr resistance protein
NBS	PGSC0003DMG401011117	PGSC0003DMP400019635	Rx_N,PF18052.2,NB-ARC,PF00931.23	'No_CC'	Leucine-rich repeat containing protein
NBS	PGSC0003DMG401011427	PGSC0003DMP400020240	NB-ARC,PF00931.23,NACHT,PF05729.13,AAA_22,PF13401.7	'No_CC'	Cc-nbs-lrr resistance protein
NBS	PGSC0003DMG401011522	PGSC0003DMP400020403	Rx_N,PF18052.2,NB-ARC,PF00931.23	'No_CC'	HJTR2GH1 protein
NBS	PGSC0003DMG401011526	PGSC0003DMP400020409	Rx_N,PF18052.2,NB-ARC,PF00931.23	'No_CC'	SNKR2GH2 protein
NBS	PGSC0003DMG401011899	PGSC0003DMP400021089	NB-ARC,PF00931.23	'No_CC'	Tospovirus resistance protein B
NBS-LRR	PGSC0003DMG401013522	PGSC0003DMP400023921	NB-ARC,PF00931.23,NB-LRR,PF12061.9,Rx_N,PF18052.2	'No_CC'	Prf
TIR-NBS	PGSC0003DMG401015682	PGSC0003DMP400027485	TIR,PF01582.21,TIR_2,PF13676.7,NB-ARC,PF00931.23	'No_CC'	NL25
NBS	PGSC0003DMG401015877	PGSC0003DMP400027825	NB-ARC,PF00931.23	'No_CC'	NBS-LRR protein
NBS	PGSC0003DMG401016602	PGSC0003DMP400029015	NB-ARC,PF00931.23	'No_CC'	Tospovirus resistance protein C
CC-NBS	PGSC0003DMG401016933	PGSC0003DMP400029592	NB-ARC,PF00931.23,AAA_22,PF13401.7,NACHT,PF05729.13	'CC_region'	Disease resistance protein; Calcium-binding EF-hand; AAA ATPase
CC-NBS	PGSC0003DMG401017416	PGSC0003DMP400030444	NB-ARC,PF00931.23,AAA_22,PF13401.7	'CC_region'	Conserved gene of unknown function
NBS-LRR	PGSC0003DMG401018576	PGSC0003DMP400032361	NB-ARC,PF00931.23,LRR_4,PF12799.8,Rx_N,PF18052.2,LRR_8,PF13855.7	'No_CC'	Disease resistance protein I2C-5
NBS	PGSC0003DMG401018696	PGSC0003DMP400032591	NB-ARC,PF00931.23,Rx_N,PF18052.2	'No_CC'	Disease resistance protein R3a
NBS-LRR	PGSC0003DMG401019148	PGSC0003DMP400033262	NB-ARC,PF00931.23,Rx_N,PF18052.2,LRR_4,PF12799.8,AAA_22,PF13401.7	'No_CC'	Leucine-rich repeat-containing protein 2, lrrc2
TIR-NBS	PGSC0003DMG401020581	PGSC0003DMP400035765	TIR,PF01582.21,NB-ARC,PF00931.23,AAA_16,PF13191.7	'No_CC'	Tir-nbs-lrr resistance protein
NBS	PGSC0003DMG401020585	PGSC0003DMP400035772	NB-ARC,PF00931.23,Rx_N,PF18052.2,AAA_22,PF13401.7	'No_CC'	Rpi-vnt1
TIR-NBS-LRR	PGSC0003DMG401020721	PGSC0003DMP400036041	TIR,PF01582.21,NB-ARC,PF00931.23,LRR_8,PF13855.7,TIR_2,PF13676.7,LRR_4,PF12799.8	'No_CC'	Leucine-rich repeat-containing protein
TIR-NBS-LRR	PGSC0003DMG401022603	PGSC0003DMP400039170	TIR,PF01582.21,NB-ARC,PF00931.23,LRR_8,PF13855.7,TIR_2,PF13676.7,LRR_4,PF12799.8,NACHT,PF05729.13	'No_CC'	ATP binding / protein binding / transmembrane receptor
NBS	PGSC0003DMG401022784	PGSC0003DMP400039501	NB-ARC,PF00931.23	'No_CC'	Resistance protein PSH-RGH6
CC-NBS-LRR	PGSC0003DMG401026043	PGSC0003DMP400045179	NB-ARC,PF00931.23,Rx_N,PF18052.2,LRR_8,PF13855.7	'CC_region'	NRC1
TIR-NBS	PGSC0003DMG401026432	PGSC0003DMP400045901	TIR,PF01582.21,NB-ARC,PF00931.23,TIR_2,PF13676.7	'No_CC'	ATP binding protein
CC-NBS	PGSC0003DMG401026842	PGSC0003DMP400046605	NB-ARC,PF00931.23,Rx_N,PF18052.2	'CC_region'	NRC1
NBS	PGSC0003DMG401027371	PGSC0003DMP400047596	NB-ARC,PF00931.23,AAA_16,PF13191.7	'No_CC'	CC-NBS-LRR protein
NBS	PGSC0003DMG401027402	PGSC0003DMP400047655	NB-ARC,PF00931.23,Rx_N,PF18052.2	'No_CC'	Disease resistance protein R3a
NBS	PGSC0003DMG401029961	PGSC0003DMP400052204	NB-ARC,PF00931.23	'No_CC'	NBS-coding resistance protein
NBS-LRR	PGSC0003DMG401030236	PGSC0003DMP400052637	NB-ARC,PF00931.23,LRR_4,PF12799.8,LRR_8,PF13855.7	'No_CC'	CC-NBS-LRR protein
TIR-NBS-LRR	PGSC0003DMG401030700	PGSC0003DMP400053466	TIR,PF01582.21,NB-ARC,PF00931.23,TIR_2,PF13676.7,LRR_8,PF13855.7,LRR_4,PF12799.8	'No_CC'	Resistance gene
NBS-LRR	PGSC0003DMG401030883	PGSC0003DMP400053795	NB-ARC,PF00931.23,LRR_8,PF13855.7,Rx_N,PF18052.2	'No_CC'	Late blight resistance protein Rpi-pta1
NBS	PGSC0003DMG402000927	PGSC0003DMP400001764	NB-ARC,PF00931.23,NACHT,PF05729.13	'No_CC'	Nucleotide binding site-leucine rich repeat protein
NBS	PGSC0003DMG402001979	PGSC0003DMP400003556	NB-ARC,PF00931.23	'No_CC'	Disease resistance protein BS2
TIR-NBS	PGSC0003DMG402002428	PGSC0003DMP400004310	TIR,PF01582.21,NB-ARC,PF00931.23,TIR_2,PF13676.7	'No_CC'	NL25
NBS	PGSC0003DMG402002917	PGSC0003DMP400005254	NB-ARC,PF00931.23,AAA_16,PF13191.7,AAA_22,PF13401.7	'No_CC'	Disease resistance protein BS2
NBS-LRR	PGSC0003DMG402004425	PGSC0003DMP400007861	NB-ARC,PF00931.23,LRR_4,PF12799.8,LRR_8,PF13855.7	'No_CC'	Cc-nbs-lrr resistance protein
NBS-LRR	PGSC0003DMG402004578	PGSC0003DMP400008091	NB-ARC,PF00931.23,LRR_4,PF12799.8	'No_CC'	Late blight resistance protein homolog R1B-16
NBS	PGSC0003DMG402006288	PGSC0003DMP400011150	NB-ARC,PF00931.23	'No_CC'	Tospovirus resistance protein B
NBS	PGSC0003DMG402007461	PGSC0003DMP400013226	NB-ARC,PF00931.23	'No_CC'	NRC1
NBS	PGSC0003DMG402007871	PGSC0003DMP400013867	NB-ARC,PF00931.23,AAA_16,PF13191.7	'No_CC'	Disease resistance protein Gpa2
NBS-LRR	PGSC0003DMG402008383	PGSC0003DMP400014710	LRR_4,PF12799.8,NB-ARC,PF00931.23	'No_CC'	Nbs-lrr resistance protein
NBS-LRR	PGSC0003DMG402009305	PGSC0003DMP400016420	NB-ARC,PF00931.23,LRR_8,PF13855.7,LRR_4,PF12799.8	'No_CC'	Blight resistance protein T118
NBS	PGSC0003DMG402009818	PGSC0003DMP400017328	NB-ARC,PF00931.23	'No_CC'	RGC1
NBS-LRR	PGSC0003DMG402011117	PGSC0003DMP400019636	LRR_4,PF12799.8,LRR_8,PF13855.7,NB-ARC,PF00931.23	'No_CC'	Cc-nbs-lrr resistance protein
NBS	PGSC0003DMG402011427	PGSC0003DMP400020242	NB-ARC,PF00931.23,AAA_22,PF13401.7	'No_CC'	Cc-nbs-lrr resistance protein
NBS	PGSC0003DMG402011522	PGSC0003DMP400020404	NB-ARC,PF00931.23	'No_CC'	EDNR2GH4 protein
NBS	PGSC0003DMG402011526	PGSC0003DMP400020410	NB-ARC,PF00931.23	'No_CC'	EDNR2GH8 protein
NBS	PGSC0003DMG402015877	PGSC0003DMP400027826	NB-ARC,PF00931.23	'No_CC'	NBS-coding resistance gene analog
NBS	PGSC0003DMG402016602	PGSC0003DMP400029017	NB-ARC,PF00931.23	'No_CC'	Tospovirus resistance protein C
TIR-NBS-LRR	PGSC0003DMG402016979	PGSC0003DMP400029664	TIR,PF01582.21,NB-ARC,PF00931.23,LRR_8,PF13855.7,TIR_2,PF13676.7,LRR_4,PF12799.8	'No_CC'	Bacterial spot disease resistance protein 4
TIR-NBS-LRR	PGSC0003DMG402016981	PGSC0003DMP400029677	TIR,PF01582.21,NB-ARC,PF00931.23,TIR_2,PF13676.7,LRR_8,PF13855.7,LRR_4,PF12799.8	'No_CC'	Bacterial spot disease resistance protein 4
NBS	PGSC0003DMG402017089	PGSC0003DMP400029874	NB-ARC,PF00931.23	'No_CC'	NBS-coding resistance gene analog
CC-NBS	PGSC0003DMG402017416	PGSC0003DMP400030446	NB-ARC,PF00931.23,AAA_22,PF13401.7	'CC_region'	Disease resistance protein; Calcium-binding EF-hand; AAA ATPase
TIR-NBS	PGSC0003DMG402018257	PGSC0003DMP400031808	TIR,PF01582.21,NB-ARC,PF00931.23,TIR_2,PF13676.7	'No_CC'	Leucine-rich repeat-containing protein
CC-NBS	PGSC0003DMG402018576	PGSC0003DMP400032362	NB-ARC,PF00931.23,Rx_N,PF18052.2,AAA_16,PF13191.7	'CC_region'	Potato late blight resistance protein R3a
NBS	PGSC0003DMG402020581	PGSC0003DMP400035766	NB-ARC,PF00931.23	'No_CC'	NBS-coding resistance gene protein
NBS	PGSC0003DMG402020585	PGSC0003DMP400035773	NB-ARC,PF00931.23,Rx_N,PF18052.2,AAA_22,PF13401.7	'No_CC'	Rpi-vnt1
NBS-LRR	PGSC0003DMG402020721	PGSC0003DMP400036040	LRR_8,PF13855.7,NB-ARC,PF00931.23,LRR_4,PF12799.8	'No_CC'	Leucine-rich repeat-containing protein
NBS-LRR	PGSC0003DMG402020874	PGSC0003DMP400036270	NB-ARC,PF00931.23,LRR_4,PF12799.8,LRR_8,PF13855.7	'No_CC'	Tospovirus resistance protein E
NBS	PGSC0003DMG402021043	PGSC0003DMP400036503	NB-ARC,PF00931.23	'No_CC'	Disease resistance protein RGA2
NBS-LRR	PGSC0003DMG402026432	PGSC0003DMP400045902	NB-ARC,PF00931.23,LRR_4,PF12799.8,AAA,PF00004.30	'No_CC'	NBS-coding resistance gene protein
CC-NBS	PGSC0003DMG402026842	PGSC0003DMP400046606	NB-ARC,PF00931.23,Rx_N,PF18052.2,AAA_22,PF13401.7	'CC_region'	NRC1
NBS	PGSC0003DMG402027371	PGSC0003DMP400047598	NB-ARC,PF00931.23	'No_CC'	CC-NBS-LRR protein
NBS	PGSC0003DMG402027402	PGSC0003DMP400047657	NB-ARC,PF00931.23,Rx_N,PF18052.2	'No_CC'	Disease resistance protein R3a
NBS	PGSC0003DMG402029961	PGSC0003DMP400052206	NB-ARC,PF00931.23	'No_CC'	NBS-coding resistance protein
NBS	PGSC0003DMG402029995	PGSC0003DMP400052262	NB-ARC,PF00931.23	'No_CC'	TMV resistance protein N
NBS-LRR	PGSC0003DMG402030235	PGSC0003DMP400052636	NB-ARC,PF00931.23,LRR_4,PF12799.8	'No_CC'	Disease resistance protein R3a
NBS-LRR	PGSC0003DMG402030883	PGSC0003DMP400053796	NB-ARC,PF00931.23,Rx_N,PF18052.2,LRR_8,PF13855.7,LRR_4,PF12799.8,AAA_16,PF13191.7	'No_CC'	Disease resistance protein RGA2
NBS	PGSC0003DMG402032547	PGSC0003DMP400055601	NB-ARC,PF00931.23,Rx_N,PF18052.2	'No_CC'	HJTR2GH1 protein
NBS	PGSC0003DMG403016979	PGSC0003DMP400029668	NB-ARC,PF00931.23	'No_CC'	NL27
TIR-NBS-LRR	PGSC0003DMG403016981	PGSC0003DMP400029678	TIR,PF01582.21,NB-ARC,PF00931.23,TIR_2,PF13676.7,LRR_4,PF12799.8,LRR_8,PF13855.7	'No_CC'	Resistance gene
NBS	PGSC0003DMG403019668	PGSC0003DMP400034187	NB-ARC,PF00931.23	'No_CC'	Disease resistance protein R3a
NBS	PGSC0003DMG403020585	PGSC0003DMP400035775	NB-ARC,PF00931.23	'No_CC'	Rpi-vnt1
NBS	PGSC0003DMG403026842	PGSC0003DMP400046608	NB-ARC,PF00931.23	'No_CC'	NRC1
CC-NBS-LRR	PGSC0003DMG404026043	PGSC0003DMP400045182	NB-ARC,PF00931.23,Rx_N,PF18052.2,LRR_8,PF13855.7	'CC_region'	NRC1

## Sheet: Solanum lycopersicum
Class	Gene_id	protein_id	NBS_domain/ids	CC_domain_Predicted	Descript
NBS-LRR	Solyc00g500406.1	Solyc00g500406.1.1	NB-ARC,PF00931.23,LRR_8,PF13855.7,LRR_4,PF12799.8	'No_CC'	Disease resistance protein (TIR-NBS-LRR class)
TIR-NBS-LRR	Solyc01g008800.3	Solyc01g008800.3.1	TIR,PF01582.21,NB-ARC,PF00931.23,LRR_8,PF13855.7,LRR_4,PF12799.8,TIR_2,PF13676.7	'No_CC'	Disease resistance protein (TIR-NBS-LRR class)
TIR-NBS-LRR	Solyc01g014840.3	Solyc01g014840.3.1	TIR,PF01582.21,NB-ARC,PF00931.23,TIR_2,PF13676.7,LRR_8,PF13855.7,LRR_4,PF12799.8	'No_CC'	Disease resistance protein (TIR-NBS-LRR class)
NBS	Solyc01g016960.1	Solyc01g016960.1.1	NB-ARC,PF00931.23	'No_CC'	NBS-coding resistance gene analog
NBS	Solyc01g017690.1	Solyc01g017690.1.1	NB-ARC,PF00931.23	'No_CC'	NBS-coding resistance gene analog
TIR-NBS-LRR	Solyc01g066020.3	Solyc01g066020.3.1	TIR,PF01582.21,NB-ARC,PF00931.23,TIR_2,PF13676.7,LRR_4,PF12799.8	'No_CC'	Disease resistance protein (TIR-NBS-LRR class)
NBS	Solyc01g067150.1	Solyc01g067150.1.1	NB-ARC,PF00931.23	'No_CC'	LOW QUALITY PROTEIN: probable disease resistance protein
NBS-LRR	Solyc01g073985.1	Solyc01g073985.1.1	NB-ARC,PF00931.23,Rx_N,PF18052.2,LRR_8,PF13855.7	'No_CC'	Disease resistance protein
NBS-LRR	Solyc01g086810.2	Solyc01g086810.2.1	NB-ARC,PF00931.23,Rx_N,PF18052.2,LRR_8,PF13855.7	'No_CC'	disease resistance protein RPM1-like
NBS	Solyc01g087200.3	Solyc01g087200.3.1	NB-ARC,PF00931.23	'No_CC'	Disease resistance protein
NBS-LRR	Solyc01g088060.3	Solyc01g088060.3.1	NB-ARC,PF00931.23,LRR_4,PF12799.8,LRR_8,PF13855.7	'No_CC'	NBS-LRR resistance protein
CC-NBS	Solyc01g090430.3	Solyc01g090430.3.1	NB-ARC,PF00931.23,Rx_N,PF18052.2	'CC_region'	NRC1
TIR-NBS	Solyc01g102840.3	Solyc01g102840.3.1	TIR,PF01582.21,NB-ARC,PF00931.23,TIR_2,PF13676.7,ATPase_2,PF01637.19	'No_CC'	Disease resistance protein (TIR-NBS-LRR class)
TIR-NBS-LRR	Solyc01g102850.3	Solyc01g102850.3.1	NB-ARC,PF00931.23,TIR,PF01582.21,LRR_8,PF13855.7,TIR_2,PF13676.7	'No_CC'	Disease resistance protein (TIR-NBS-LRR class) family
TIR-NBS-LRR	Solyc01g102880.3	Solyc01g102880.3.1	TIR,PF01582.21,TIR_2,PF13676.7,NB-ARC,PF00931.23,LRR_8,PF13855.7,AAA_22,PF13401.7,LRR_4,PF12799.8,AAA_16,PF13191.7	'No_CC'	Disease resistance protein (TIR-NBS-LRR class)
TIR-NBS	Solyc01g102920.3	Solyc01g102920.3.1	NB-ARC,PF00931.23,TIR,PF01582.21	'No_CC'	Disease resistance protein (TIR-NBS-LRR class)
NBS	Solyc01g103610.4	Solyc01g103610.4.1	NB-ARC,PF00931.23	'No_CC'	Disease resistance protein
NBS-LRR	Solyc01g106410.3	Solyc01g106410.3.1	NB-ARC,PF00931.23,Rx_N,PF18052.2,LRR_4,PF12799.8,LRR_8,PF13855.7	'No_CC'	NBS-LRR resistance protein
TIR-NBS-LRR	Solyc01g113620.3	Solyc01g113620.3.1	TIR,PF01582.21,NB-ARC,PF00931.23,LRR_8,PF13855.7,TIR_2,PF13676.7	'No_CC'	Disease resistance protein (TIR-NBS-LRR class)
NBS	Solyc02g027080.2	Solyc02g027080.2.1	NB-ARC,PF00931.23,AAA_16,PF13191.7	'No_CC'	Disease resistance protein (CC-NBS-LRR class) family
NBS	Solyc02g030290.1	Solyc02g030290.1.1	NB-ARC,PF00931.23,Rx_N,PF18052.2	'No_CC'	NBS-LRR disease resistance-like protein
NBS	Solyc02g032240.1	Solyc02g032240.1.1	NB-ARC,PF00931.23	'No_CC'	Disease resistance protein (TIR-NBS-LRR class)
TIR-NBS-LRR	Solyc02g032650.3	Solyc02g032650.3.1	TIR,PF01582.21,NB-ARC,PF00931.23,TIR_2,PF13676.7,LRR_8,PF13855.7	'No_CC'	Disease resistance protein (TIR-NBS-LRR class)
NBS	Solyc02g036270.4	Solyc02g036270.4.1	NB-ARC,PF00931.23	'No_CC'	Disease resistance protein
NBS-LRR	Solyc02g037540.3	Solyc02g037540.3.1	NB-ARC,PF00931.23,LRR_8,PF13855.7,LRR_4,PF12799.8	'No_CC'	Disease resistance protein
NBS-LRR	Solyc02g070410.2	Solyc02g070410.2.1	NB-ARC,PF00931.23,LRR_4,PF12799.8,AAA_18,PF13238.7	'No_CC'	Disease resistance protein
NBS	Solyc02g070750.1	Solyc02g070750.1.1	NB-ARC,PF00931.23,Rx_N,PF18052.2	'No_CC'	Disease resistance protein
TIR-NBS-LRR	Solyc02g082050.3	Solyc02g082050.3.1	TIR,PF01582.21,NB-ARC,PF00931.23,TIR_2,PF13676.7,LRR_8,PF13855.7,LRR_4,PF12799.8	'No_CC'	Disease resistance protein (TIR-NBS-LRR class)
NBS-LRR	Solyc02g084450.4	Solyc02g084450.4.1	NB-ARC,PF00931.23,LRR_8,PF13855.7,LRR_4,PF12799.8	'No_CC'	NBS-LRR resistance protein
CC-NBS	Solyc02g084890.3	Solyc02g084890.3.1	NB-ARC,PF00931.23,Rx_N,PF18052.2,AAA_22,PF13401.7	'CC_region'	Disease resistance RPP13-like protein 4
NBS-LRR	Solyc02g090380.4	Solyc02g090380.4.1	RPW8,PF05659.12,NB-ARC,PF00931.23,LRR_4,PF12799.8,AAA_22,PF13401.7	'No_CC'	Disease resistance protein (CC-NBS-LRR class) family
NBS	Solyc03g005650.1	Solyc03g005650.1.1	NB-ARC,PF00931.23	'No_CC'	Disease resistance protein
NBS	Solyc03g005660.4	Solyc03g005660.4.1	NB-ARC,PF00931.23,Rx_N,PF18052.2	'No_CC'	Disease resistance protein
NBS	Solyc03g005670.3	Solyc03g005670.3.1	NB-ARC,PF00931.23	'No_CC'	Disease resistance protein
NBS	Solyc03g006750.1	Solyc03g006750.1.1	NB-ARC,PF00931.23	'No_CC'	NBS-LRR disease resistance-like protein
NBS	Solyc03g053070.1	Solyc03g053070.1.1	NB-ARC,PF00931.23	'No_CC'	NBS-LRR resistance protein
NBS-LRR	Solyc03g078300.3	Solyc03g078300.3.1	NB-ARC,PF00931.23,LRR_4,PF12799.8,Rx_N,PF18052.2,LRR_8,PF13855.7,AAA_16,PF13191.7	'No_CC'	NBS-LRR resistance protein
NBS	Solyc03g094100.1	Solyc03g094100.1.1	NB-ARC,PF00931.23	'No_CC'	Disease resistance protein
CC-NBS	Solyc04g005540.3	Solyc04g005540.3.1	NB-ARC,PF00931.23	'CC_region'	Pvr4
CC-NBS	Solyc04g005550.2	Solyc04g005550.2.1	NB-ARC,PF00931.23	'CC_region'	Tsw
CC-NBS	Solyc04g007030.4	Solyc04g007030.4.1	NB-ARC,PF00931.23,Rx_N,PF18052.2	'CC_region'	Disease resistance protein
CC-NBS	Solyc04g007050.4	Solyc04g007050.4.1	NB-ARC,PF00931.23,Rx_N,PF18052.2	'CC_region'	Disease resistance protein
CC-NBS	Solyc04g007060.4	Solyc04g007060.4.1	NB-ARC,PF00931.23,Rx_N,PF18052.2	'CC_region'	Disease resistance protein
CC-NBS	Solyc04g007070.3	Solyc04g007070.3.1	NB-ARC,PF00931.23,Rx_N,PF18052.2	'CC_region'	Disease resistance protein
TIR-NBS-LRR	Solyc04g007320.3	Solyc04g007320.3.1	TIR,PF01582.21,NB-ARC,PF00931.23,TIR_2,PF13676.7,LRR_4,PF12799.8,LRR_8,PF13855.7,AAA_16,PF13191.7	'No_CC'	Disease resistance protein (TIR-NBS-LRR class)
NBS-LRR	Solyc04g007490.3	Solyc04g007490.3.1	NB-ARC,PF00931.23,NB-LRR,PF12061.9,Rx_N,PF18052.2	'No_CC'	Disease resistance protein
NBS	Solyc04g008120.3	Solyc04g008120.3.1	NB-ARC,PF00931.23	'No_CC'	Hero resistance protein
NBS	Solyc04g008130.3	Solyc04g008130.3.1	NB-ARC,PF00931.23,AAA_22,PF13401.7	'No_CC'	Hero resistance protein
NBS-LRR	Solyc04g008205.1	Solyc04g008205.1.1	NB-ARC,PF00931.23,LRR_4,PF12799.8,AAA_22,PF13401.7	'No_CC'	Hero resistance protein
NBS	Solyc04g009070.1	Solyc04g009070.1.1	NB-ARC,PF00931.23	'No_CC'	Disease resistance protein RPP13
NBS	Solyc04g009080.1	Solyc04g009080.1.1	NB-ARC,PF00931.23	'No_CC'	Disease resistance protein
NBS	Solyc04g009100.1	Solyc04g009100.1.1	NB-ARC,PF00931.23	'No_CC'	Disease resistance protein RPP13
CC-NBS	Solyc04g009110.1	Solyc04g009110.1.1	NB-ARC,PF00931.23,Rx_N,PF18052.2	'CC_region'	Disease resistance protein
NBS	Solyc04g009120.3	Solyc04g009120.3.1	NB-ARC,PF00931.23	'No_CC'	Disease resistance protein
NBS	Solyc04g009130.4	Solyc04g009130.4.1	NB-ARC,PF00931.23,Rx_N,PF18052.2	'No_CC'	Disease resistance protein
NBS	Solyc04g009150.1	Solyc04g009150.1.1	NB-ARC,PF00931.23,Rx_N,PF18052.2	'No_CC'	Disease resistance protein
NBS	Solyc04g009240.2	Solyc04g009240.2.1	NB-ARC,PF00931.23,Rx_N,PF18052.2	'No_CC'	Disease resistance protein
NBS	Solyc04g009250.1	Solyc04g009250.1.1	NB-ARC,PF00931.23,Rx_N,PF18052.2	'No_CC'	Disease resistance protein
NBS	Solyc04g009260.3	Solyc04g009260.3.1	NB-ARC,PF00931.23,Rx_N,PF18052.2	'No_CC'	Disease resistance protein
CC-NBS	Solyc04g009290.1	Solyc04g009290.1.1	NB-ARC,PF00931.23,Rx_N,PF18052.2	'CC_region'	Disease resistance protein
NBS	Solyc04g009660.2	Solyc04g009660.2.1	NB-ARC,PF00931.23,Rx_N,PF18052.2	'No_CC'	Disease resistance protein
NBS	Solyc04g009690.2	Solyc04g009690.2.1	NB-ARC,PF00931.23	'No_CC'	Disease resistance protein
NBS	Solyc04g011890.1	Solyc04g011890.1.1	NB-ARC,PF00931.23	'No_CC'	Disease resistance protein
NBS	Solyc04g011960.2	Solyc04g011960.2.1	NB-ARC,PF00931.23	'No_CC'	Disease resistance protein
NBS	Solyc04g011980.1	Solyc04g011980.1.1	NB-ARC,PF00931.23	'No_CC'	Disease resistance protein
NBS	Solyc04g011990.3	Solyc04g011990.3.1	NB-ARC,PF00931.23	'No_CC'	Disease resistance protein
NBS	Solyc04g012000.1	Solyc04g012000.1.1	NB-ARC,PF00931.23	'No_CC'	NBS-coding resistance gene analog
NBS	Solyc04g012010.3	Solyc04g012010.3.1	NB-ARC,PF00931.23	'No_CC'	Disease resistance protein
NBS	Solyc04g015210.4	Solyc04g015210.4.1	NB-ARC,PF00931.23,Rx_N,PF18052.2	'No_CC'	Disease resistance protein
NBS-LRR	Solyc04g015220.4	Solyc04g015220.4.1	NB-ARC,PF00931.23,LRR_8,PF13855.7	'No_CC'	Disease resistance protein
NBS-LRR	Solyc04g015630.2	Solyc04g015630.2.1	LRR_8,PF13855.7	'No_CC'	NBS-LRR resistance-like protein
NBS	Solyc04g015640.1	Solyc04g015640.1.1	Rx_N,PF18052.2,NB-ARC,PF00931.23	'No_CC'	Disease resistance protein rga3-like
NBS	Solyc04g025820.1	Solyc04g025820.1.1	NB-ARC,PF00931.23,Rx_N,PF18052.2	'No_CC'	Disease resistance protein
NBS	Solyc04g025840.3	Solyc04g025840.3.1	NB-ARC,PF00931.23,Rx_N,PF18052.2	'No_CC'	Disease resistance protein
NBS	Solyc04g025850.1	Solyc04g025850.1.1	NB-ARC,PF00931.23	'No_CC'	Disease resistance protein RPP13
NBS	Solyc04g026110.4	Solyc04g026110.4.1	NB-ARC,PF00931.23,Rx_N,PF18052.2	'No_CC'	Disease resistance protein
NBS	Solyc04g048910.1	Solyc04g048910.1.1	NB-ARC,PF00931.23	'No_CC'	Disease resistance protein
NBS	Solyc04g048920.1	Solyc04g048920.1.1	NB-ARC,PF00931.23	'No_CC'	Disease resistance protein
TIR-NBS-LRR	Solyc04g056570.3	Solyc04g056570.3.1	TIR,PF01582.21,NB-ARC,PF00931.23,TIR_2,PF13676.7,LRR_4,PF12799.8,LRR_8,PF13855.7	'No_CC'	Disease resistance protein (TIR-NBS-LRR class)
NBS-LRR	Solyc04g079420.3	Solyc04g079420.3.1	NB-ARC,PF00931.23,RPW8,PF05659.12,LRR_8,PF13855.7	'No_CC'	Disease resistance protein (CC-NBS-LRR class) family
NBS-LRR	Solyc05g005130.3	Solyc05g005130.3.1	NB-ARC,PF00931.23,NB-LRR,PF12061.9,AAA_22,PF13401.7	'No_CC'	Prf
NBS-LRR	Solyc05g005330.3	Solyc05g005330.3.1	NB-LRR,PF12061.9,NB-ARC,PF00931.23	'No_CC'	Disease resistance protein
TIR-NBS-LRR	Solyc05g006620.3	Solyc05g006620.3.1	TIR,PF01582.21,NB-ARC,PF00931.23,LRR_8,PF13855.7,TIR_2,PF13676.7,LRR_4,PF12799.8,NACHT,PF05729.13	'No_CC'	Disease resistance protein (TIR-NBS-LRR class)
CC-NBS-LRR	Solyc05g007170.3	Solyc05g007170.3.1	NB-ARC,PF00931.23,NB-LRR,PF12061.9,Rx_N,PF18052.2	'CC_region'	Prf
NBS-LRR	Solyc05g007350.3	Solyc05g007350.3.1	NB-LRR,PF12061.9,NB-ARC,PF00931.23	'No_CC'	Late blight resistance protein R1-A
NBS-LRR	Solyc05g007610.2	Solyc05g007610.2.1	NB-ARC,PF00931.23,NB-LRR,PF12061.9,AAA_16,PF13191.7,AAA_22,PF13401.7,AAA_33,PF13671.7,AAA_18,PF13238.7,MMR_HSR1,PF01926.24	'No_CC'	Resistance protein R1
NBS-LRR	Solyc05g007630.3	Solyc05g007630.3.1	NB-LRR,PF12061.9,NB-ARC,PF00931.23	'No_CC'	Resistance protein R1
CC-NBS-LRR	Solyc05g007640.3	Solyc05g007640.3.1	NB-LRR,PF12061.9,NB-ARC,PF00931.23	'CC_region'	Non-specific serine/threonine protein kinase
TIR-NBS-LRR	Solyc05g007850.2	Solyc05g007850.2.1	TIR,PF01582.21,NB-ARC,PF00931.23,TIR_2,PF13676.7,LRR_4,PF12799.8,LRR_8,PF13855.7	'No_CC'	bacterial spot disease resistance protein 4
CC-NBS	Solyc05g008070.4	Solyc05g008070.4.1	NB-ARC,PF00931.23,Rx_N,PF18052.2	'CC_region'	Disease resistance protein
NBS-LRR	Solyc05g009740.1	Solyc05g009740.1.1	NB-ARC,PF00931.23,LRR_4,PF12799.8	'No_CC'	Disease resistance protein
NBS	Solyc05g009750.1	Solyc05g009750.1.1	NB-ARC,PF00931.23	'No_CC'	Disease resistance protein
CC-NBS-LRR	Solyc05g012740.2	Solyc05g012740.2.1	NB-LRR,PF12061.9,NB-ARC,PF00931.23	'CC_region'	Disease resistance protein
NBS-LRR	Solyc05g012890.1	Solyc05g012890.1.1	NB-LRR,PF12061.9,NB-ARC,PF00931.23	'No_CC'	Late blight resistance protein R1-A
NBS-LRR	Solyc05g012910.4	Solyc05g012910.4.1	NB-LRR,PF12061.9,NB-ARC,PF00931.23	'No_CC'	Disease resistance protein
NBS	Solyc05g013260.3	Solyc05g013260.3.1	NB-ARC,PF00931.23,Rx_N,PF18052.2,AAA_22,PF13401.7	'No_CC'	PRF
NBS-LRR	Solyc05g013280.4	Solyc05g013280.4.1	NB-ARC,PF00931.23,Rx_N,PF18052.2,NB-LRR,PF12061.9	'No_CC'	Pseudomonas resistance
NBS	Solyc05g018710.3	Solyc05g018710.3.1	NB-ARC,PF00931.23	'No_CC'	Disease resistance protein
NBS	Solyc05g021140.1	Solyc05g021140.1.1	NB-ARC,PF00931.23	'No_CC'	Disease resistance protein
NBS	Solyc05g024370.1	Solyc05g024370.1.1	NB-ARC,PF00931.23	'No_CC'	Disease resistance protein (TIR-NBS-LRR class)
NBS	Solyc05g042090.2	Solyc05g042090.2.1	NB-ARC,PF00931.23	'No_CC'	Plant resistance protein
CC-NBS	Solyc05g043420.2	Solyc05g043420.2.1	NB-ARC,PF00931.23	'CC_region'	Plant resistance protein
NBS	Solyc05g044490.3	Solyc05g044490.3.1	NB-ARC,PF00931.23	'No_CC'	Plant resistance protein
NBS	Solyc05g050430.2	Solyc05g050430.2.1	NB-ARC,PF00931.23	'No_CC'	Plant resistance protein
NBS	Solyc05g054010.4	Solyc05g054010.4.1	NB-ARC,PF00931.23	'No_CC'	Plant resistance protein
NBS	Solyc05g054340.4	Solyc05g054340.4.1	NB-ARC,PF00931.23	'No_CC'	Plant resistance protein
NBS	Solyc06g008368.1	Solyc06g008368.1.1	NB-ARC,PF00931.23,Rx_N,PF18052.2	'No_CC'	Plant resistance protein
NBS	Solyc06g008785.1	Solyc06g008785.1.1	NB-ARC,PF00931.23	'No_CC'	Plant resistance protein
CC-NBS-LRR	Solyc06g048910.2	Solyc06g048910.2.1	NB-ARC,PF00931.23,LRR_8,PF13855.7,LRR_4,PF12799.8	'CC_region'	Disease resistance protein
NBS	Solyc06g062440.4	Solyc06g062440.4.1	NB-ARC,PF00931.23	'No_CC'	Disease resistance protein
NBS	Solyc06g064680.1	Solyc06g064680.1.1	NB-ARC,PF00931.23	'No_CC'	NBS-coding resistance gene analog
NBS	Solyc06g064690.2	Solyc06g064690.2.1	NB-ARC,PF00931.23	'No_CC'	NBS-coding resistance gene analog
NBS	Solyc06g064720.1	Solyc06g064720.1.1	NB-ARC,PF00931.23	'No_CC'	NB-LRR tospovirus immune receptor
NBS	Solyc06g064750.1	Solyc06g064750.1.1	NB-ARC,PF00931.23	'No_CC'	Reistance protein F
NBS	Solyc06g064760.2	Solyc06g064760.2.1	NB-ARC,PF00931.23	'No_CC'	Reistance protein F
NBS	Solyc07g005770.2	Solyc07g005770.2.1	NB-ARC,PF00931.23,RuvB_N,PF05496.13	'No_CC'	Disease resistance protein
NBS	Solyc07g009180.1	Solyc07g009180.1.1	NB-ARC,PF00931.23	'No_CC'	Disease resistance protein
NBS	Solyc07g009190.1	Solyc07g009190.1.1	NB-ARC,PF00931.23	'No_CC'	Disease resistance protein
NBS	Solyc07g015900.3	Solyc07g015900.3.1	NB-ARC,PF00931.23	'No_CC'	Disease resistance protein
NBS	Solyc07g039390.1	Solyc07g039390.1.1	NB-ARC,PF00931.23	'No_CC'	Disease resistance protein RPP13
NBS	Solyc07g039400.3	Solyc07g039400.3.1	NB-ARC,PF00931.23	'No_CC'	Disease resistance protein (CC-NBS-LRR)
NBS	Solyc07g039420.1	Solyc07g039420.1.1	NB-ARC,PF00931.23,Rx_N,PF18052.2	'No_CC'	Disease resistance protein
NBS	Solyc07g039440.1	Solyc07g039440.1.1	NB-ARC,PF00931.23	'No_CC'	Disease resistance protein
NBS	Solyc07g044800.2	Solyc07g044800.2.1	NB-ARC,PF00931.23	'No_CC'	Disease resistance protein
NBS	Solyc07g049700.1	Solyc07g049700.1.1	NB-ARC,PF00931.23	'No_CC'	Disease resistance protein
TIR-NBS-LRR	Solyc07g052770.2	Solyc07g052770.2.1	TIR,PF01582.21,NB-ARC,PF00931.23,TIR_2,PF13676.7,LRR_8,PF13855.7,LRR_4,PF12799.8	'No_CC'	Disease resistance protein (TIR-NBS-LRR class)
NBS-LRR	Solyc07g052790.3	Solyc07g052790.3.1	NB-ARC,PF00931.23,LRR_8,PF13855.7,LRR_4,PF12799.8	'No_CC'	Disease resistance protein (TIR-NBS-LRR class)
NBS	Solyc07g052800.3	Solyc07g052800.3.1	NB-ARC,PF00931.23	'No_CC'	Disease resistance protein (TIR-NBS-LRR class)
NBS	Solyc07g053010.3	Solyc07g053010.3.1	NB-ARC,PF00931.23,Rx_N,PF18052.2	'No_CC'	Disease resistance protein
NBS	Solyc07g053020.3	Solyc07g053020.3.1	NB-ARC,PF00931.23,Rx_N,PF18052.2	'No_CC'	Disease resistance protein
NBS-LRR	Solyc07g055380.1	Solyc07g055380.1.1	NB-ARC,PF00931.23,LRR_4,PF12799.8,LRR_8,PF13855.7,NACHT,PF05729.13	'No_CC'	Disease resistance protein (TIR-NBS-LRR class)
NBS	Solyc07g055610.3	Solyc07g055610.3.1	NB-ARC,PF00931.23	'No_CC'	Disease resistance protein (TIR-NBS-LRR class)
NBS-LRR	Solyc08g005440.3	Solyc08g005440.3.1	NB-ARC,PF00931.23,Rx_N,PF18052.2,LRR_4,PF12799.8,AAA_16,PF13191.7	'No_CC'	Disease resistance protein
NBS	Solyc08g005500.4	Solyc08g005500.4.1	NB-ARC,PF00931.23,AAA_33,PF13671.7	'No_CC'	NBS-LRR protein
NBS-LRR	Solyc08g007250.3	Solyc08g007250.3.1	NB-ARC,PF00931.23,LRR_8,PF13855.7,LRR_4,PF12799.8	'No_CC'	Disease resistance protein
NBS-LRR	Solyc08g007630.1	Solyc08g007630.1.1	NB-ARC,PF00931.23,Rx_N,PF18052.2,LRR_4,PF12799.8,LRR_8,PF13855.7	'No_CC'	Disease resistance protein I2
NBS-LRR	Solyc08g013970.3	Solyc08g013970.3.1	NB-ARC,PF00931.23,LRR_8,PF13855.7,LRR_4,PF12799.8	'No_CC'	Disease resistance protein (CC-NBS-LRR class) family
NBS	Solyc08g074250.3	Solyc08g074250.3.1	NB-ARC,PF00931.23	'No_CC'	Disease resistance protein
NBS-LRR	Solyc08g075630.3	Solyc08g075630.3.1	NB-ARC,PF00931.23,Rx_N,PF18052.2,LRR_8,PF13855.7,LRR_4,PF12799.8	'No_CC'	Disease resistance protein RGA2
NBS-LRR	Solyc08g075640.4	Solyc08g075640.4.1	NB-ARC,PF00931.23,Rx_N,PF18052.2,LRR_8,PF13855.7,LRR_4,PF12799.8	'No_CC'	Disease resistance protein RGA2
NBS	Solyc08g075980.2	Solyc08g075980.2.1	NB-ARC,PF00931.23,Rx_N,PF18052.2	'No_CC'	Disease resistance protein RGA2
CC-NBS-LRR	Solyc09g005290.1	Solyc09g005290.1.1	NB-ARC,PF00931.23,Rx_N,PF18052.2,LRR_4,PF12799.8,LRR_8,PF13855.7	'CC_region'	NBS-LRR resistance protein
TIR-NBS-LRR	Solyc09g007710.3	Solyc09g007710.3.1	TIR,PF01582.21,NB-ARC,PF00931.23,TIR_2,PF13676.7,LRR_4,PF12799.8,LRR_8,PF13855.7,NACHT,PF05729.13	'No_CC'	Disease resistance protein (TIR-NBS-LRR class)
NBS	Solyc09g018220.3	Solyc09g018220.3.1	NB-ARC,PF00931.23,Rx_N,PF18052.2	'No_CC'	Tobacco mosaic virus resistance-2
NBS-LRR	Solyc09g059830.3	Solyc09g059830.3.1	LRR_8,PF13855.7	'No_CC'	Disease resistance protein RGA2
NBS-LRR	Solyc09g064610.3	Solyc09g064610.3.1	NB-ARC,PF00931.23,Rx_N,PF18052.2,LRR_4,PF12799.8	'No_CC'	Disease resistance protein RGA2
NBS	Solyc09g064680.3	Solyc09g064680.3.1	NB-ARC,PF00931.23	'No_CC'	NB-LRR tospovirus immune receptor
NBS	Solyc09g064690.1	Solyc09g064690.1.1	NB-ARC,PF00931.23	'No_CC'	NB-LRR tospovirus immune receptor
NBS	Solyc09g092280.1	Solyc09g092280.1.1	NB-ARC,PF00931.23,Rx_N,PF18052.2	'No_CC'	Late blight resistance protein
NBS	Solyc09g092290.1	Solyc09g092290.1.1	NB-ARC,PF00931.23,Rx_N,PF18052.2	'No_CC'	Late blight resistance protein
CC-NBS	Solyc09g092300.3	Solyc09g092300.3.1	Rx_N,PF18052.2,NB-ARC,PF00931.23	'CC_region'	Late blight resistance protein
NBS	Solyc09g092310.1	Solyc09g092310.1.1	NB-ARC,PF00931.23,Rx_N,PF18052.2	'No_CC'	Late blight resistance protein
TIR-NBS-LRR	Solyc09g092410.4	Solyc09g092410.4.1	TIR,PF01582.21,NB-ARC,PF00931.23,LRR_4,PF12799.8,TIR_2,PF13676.7,AAA_16,PF13191.7,LRR_8,PF13855.7	'No_CC'	Disease resistance protein (TIR-NBS-LRR class)
NBS	Solyc09g098100.4	Solyc09g098100.4.1	NB-ARC,PF00931.23	'No_CC'	NB-LRR tospovirus immune receptor
NBS	Solyc09g098130.3	Solyc09g098130.3.1	NB-ARC,PF00931.23	'No_CC'	Spotted wilt resistance-5
NBS	Solyc09g098210.2	Solyc09g098210.2.1	NB-ARC,PF00931.23	'No_CC'	Disease resistance protein
NBS	Solyc10g008220.4	Solyc10g008220.4.1	NB-ARC,PF00931.23,Rx_N,PF18052.2	'No_CC'	Disease resistance protein
NBS	Solyc10g008230.3	Solyc10g008230.3.1	NB-ARC,PF00931.23	'No_CC'	Disease resistance protein
NBS	Solyc10g008240.3	Solyc10g008240.3.1	NB-ARC,PF00931.23	'No_CC'	Disease resistance protein
NBS	Solyc10g047320.2	Solyc10g047320.2.1	NB-ARC,PF00931.23,Rx_N,PF18052.2	'No_CC'	Disease resistance protein
NBS	Solyc10g050050.1	Solyc10g050050.1.1	NB-ARC,PF00931.23	'No_CC'	Disease resistance protein
NBS-LRR	Solyc10g050740.1	Solyc10g050740.1.1	LRR_4,PF12799.8	'No_CC'	Disease resistance protein
NBS	Solyc10g051050.3	Solyc10g051050.3.1	NB-ARC,PF00931.23	'No_CC'	Disease resistance protein
NBS	Solyc10g054600.1	Solyc10g054600.1.1	Rx_N,PF18052.2	'No_CC'	NBS-LRR resistance protein
NBS	Solyc10g054940.1	Solyc10g054940.1.1	NB-ARC,PF00931.23,AAA_22,PF13401.7	'No_CC'	Disease resistance protein
NBS	Solyc10g054970.1	Solyc10g054970.1.1	NB-ARC,PF00931.23	'No_CC'	Disease resistance protein
NBS	Solyc10g055050.2	Solyc10g055050.2.1	NB-ARC,PF00931.23,NACHT,PF05729.13	'No_CC'	Disease resistance protein
CC-NBS	Solyc10g055080.3	Solyc10g055080.3.1	NB-ARC,PF00931.23	'CC_region'	Pvr4
NBS	Solyc10g055120.1	Solyc10g055120.1.1	NB-ARC,PF00931.23	'No_CC'	NB-ARC domains-containing protein
NBS	Solyc10g055170.1	Solyc10g055170.1.1	NB-ARC,PF00931.23	'No_CC'	Disease resistance protein
NBS	Solyc10g074640.3	Solyc10g074640.3.1	NB-ARC,PF00931.23	'No_CC'	Disease resistance protein
CC-NBS-LRR	Solyc10g076440.1	Solyc10g076440.1.1	NB-ARC,PF00931.23,LRR_8,PF13855.7,LRR_4,PF12799.8	'CC_region'	Disease resistance protein
NBS-LRR	Solyc10g085460.3	Solyc10g085460.3.1	NB-ARC,PF00931.23,Rx_N,PF18052.2,LRR_4,PF12799.8,LRR_8,PF13855.7,AAA_22,PF13401.7	'No_CC'	NBS-LRR resistance protein
NBS	Solyc10g085780.1	Solyc10g085780.1.1	NB-ARC,PF00931.23	'No_CC'	NBS-LRR resistance protein
NBS	Solyc10g086590.3	Solyc10g086590.3.1	fn3_6,PF17766.2,NB-ARC,PF00931.23	'No_CC'	Disease resistance protein
CC-NBS	Solyc11g006520.2	Solyc11g006520.2.1	NB-ARC,PF00931.23	'CC_region'	Disease resistance protein
NBS	Solyc11g006530.3	Solyc11g006530.3.1	NB-ARC,PF00931.23	'No_CC'	Disease resistance protein
NBS	Solyc11g006630.1	Solyc11g006630.1.1	NB-ARC,PF00931.23,AAA_22,PF13401.7	'No_CC'	Disease resistance protein
NBS	Solyc11g006640.3	Solyc11g006640.3.1	NB-ARC,PF00931.23	'No_CC'	Disease resistance protein
NBS-LRR	Solyc11g007790.1	Solyc11g007790.1.1	NB-ARC,PF00931.23,LRR_8,PF13855.7,LRR_4,PF12799.8	'No_CC'	Disease resistance protein
NBS-LRR	Solyc11g010160.1	Solyc11g010160.1.1	NB-ARC,PF00931.23,Rx_N,PF18052.2,LRR_8,PF13855.7,NACHT,PF05729.13,LRR_4,PF12799.8	'No_CC'	Disease resistance protein
TIR-NBS-LRR	Solyc11g011080.3	Solyc11g011080.3.1	TIR,PF01582.21,NB-ARC,PF00931.23,TIR_2,PF13676.7,LRR_8,PF13855.7,LRR_4,PF12799.8,AAA_22,PF13401.7,AAA_16,PF13191.7	'No_CC'	Disease resistance protein (TIR-NBS-LRR class)
TIR-NBS-LRR	Solyc11g011090.1	Solyc11g011090.1.1	TIR,PF01582.21,NB-ARC,PF00931.23,LRR_4,PF12799.8,LRR_8,PF13855.7,TIR_2,PF13676.7,AAA,PF00004.30,AAA_16,PF13191.7,AAA_22,PF13401.7	'No_CC'	Disease resistance protein (TIR-NBS-LRR class)
TIR-NBS-LRR	Solyc11g011350.3	Solyc11g011350.3.1	TIR,PF01582.21,NB-ARC,PF00931.23,LRR_8,PF13855.7,TIR_2,PF13676.7,LRR_4,PF12799.8	'No_CC'	Disease resistance protein (TIR-NBS-LRR class)
NBS	Solyc11g020080.3	Solyc11g020080.3.1	NB-ARC,PF00931.23	'No_CC'	Disease resistance protein
NBS	Solyc11g020090.1	Solyc11g020090.1.1	NB-ARC,PF00931.23	'No_CC'	NBS-LRR protein
CC-NBS	Solyc11g020100.3	Solyc11g020100.3.1	NB-ARC,PF00931.23,AAA_14,PF13173.7	'CC_region'	Disease resistance protein
NBS	Solyc11g042730.3	Solyc11g042730.3.1	NB-ARC,PF00931.23	'No_CC'	CC-NBS-LRR type resistance protein
NBS	Solyc11g043100.1	Solyc11g043100.1.1	NB-ARC,PF00931.23	'No_CC'	Disease resistance protein R3a-like protein
TIR-NBS	Solyc11g062150.3	Solyc11g062150.3.1	TIR,PF01582.21,TIR_2,PF13676.7,NB-ARC,PF00931.23	'No_CC'	Disease resistance protein (TIR-NBS-LRR class) family
NBS-LRR	Solyc11g064770.3	Solyc11g064770.3.1	NB-ARC,PF00931.23,Rx_N,PF18052.2,LRR_8,PF13855.7	'No_CC'	CC-NBS-LRR type resistance protein
NBS	Solyc11g065790.1	Solyc11g065790.1.1	NB-ARC,PF00931.23	'No_CC'	Disease resistance protein I2
NBS	Solyc11g068360.1	Solyc11g068360.1.1	NB-ARC,PF00931.23,Rx_N,PF18052.2	'No_CC'	CC-NBS-LRR type resistance protein
NBS	Solyc11g069020.3	Solyc11g069020.3.1	NB-ARC,PF00931.23,AAA_14,PF13173.7	'No_CC'	Disease resistance protein
NBS-LRR	Solyc11g069620.3	Solyc11g069620.3.1	NB-ARC,PF00931.23,Rx_N,PF18052.2,LRR_4,PF12799.8,AAA_16,PF13191.7	'No_CC'	CC-NBS-LRR type resistance protein
NBS	Solyc11g069920.1	Solyc11g069920.1.1	NB-ARC,PF00931.23	'No_CC'	I2C6
NBS-LRR	Solyc11g069990.2	Solyc11g069990.2.1	NB-ARC,PF00931.23,LRR_4,PF12799.8,LRR_8,PF13855.7	'No_CC'	I2C5
NBS-LRR	Solyc11g071420.3	Solyc11g071420.3.1	NB-ARC,PF00931.23,Rx_N,PF18052.2,LRR_4,PF12799.8,AAA_16,PF13191.7	'No_CC'	I2C2
NBS-LRR	Solyc11g071430.1	Solyc11g071430.1.1	NB-ARC,PF00931.23,LRR_4,PF12799.8,Rx_N,PF18052.2	'No_CC'	Immunity to Fusarium wilt race 2
NBS	Solyc12g005520.1	Solyc12g005520.1.1	NB-ARC,PF00931.23,ATPase_2,PF01637.19	'No_CC'	Disease resistance protein (CC-NBS-LRR class) family
NBS	Solyc12g005530.1	Solyc12g005530.1.1	NB-ARC,PF00931.23	'No_CC'	Disease resistance protein
NBS	Solyc12g005970.1	Solyc12g005970.1.1	NB-ARC,PF00931.23	'No_CC'	NBS-LRR protein
NBS	Solyc12g006040.3	Solyc12g006040.3.1	NB-ARC,PF00931.23	'No_CC'	NBS-LRR protein
NBS	Solyc12g009450.3	Solyc12g009450.3.1	NB-ARC,PF00931.23,AAA_16,PF13191.7	'No_CC'	NBS-LRR protein
NBS	Solyc12g009460.1	Solyc12g009460.1.1	NB-ARC,PF00931.23,AAA_16,PF13191.7	'No_CC'	Disease resistance protein (CC-NBS-LRR class) family
NBS	Solyc12g010660.1	Solyc12g010660.1.1	NB-ARC,PF00931.23	'No_CC'	NBS-LRR protein
NBS	Solyc12g016220.3	Solyc12g016220.3.1	NB-ARC,PF00931.23,NACHT,PF05729.13	'No_CC'	Disease resistance protein
NBS	Solyc12g017730.1	Solyc12g017730.1.1	NB-ARC,PF00931.23	'No_CC'	Disease resistance protein
NBS	Solyc12g017800.3	Solyc12g017800.3.1	NB-ARC,PF00931.23	'No_CC'	Disease resistance protein
NBS	Solyc12g038900.1	Solyc12g038900.1.1	NB-ARC,PF00931.23,AAA_22,PF13401.7	'No_CC'	NB-LRR tospovirus immune receptor
NBS	Solyc12g044180.3	Solyc12g044180.3.1	NB-ARC,PF00931.23,NACHT,PF05729.13,AAA_22,PF13401.7	'No_CC'	Disease resistance protein
NBS	Solyc12g044190.3	Solyc12g044190.3.1	NB-ARC,PF00931.23	'No_CC'	Pvr4
NBS	Solyc12g044200.3	Solyc12g044200.3.1	NB-ARC,PF00931.23,NACHT,PF05729.13,AAA_22,PF13401.7	'No_CC'	Disease resistance protein
NBS	Solyc12g094660.2	Solyc12g094660.2.1	NB-ARC,PF00931.23,AAA_22,PF13401.7	'No_CC'	Disease resistance protein
NBS	Solyc12g096920.1	Solyc12g096920.1.1	NB-ARC,PF00931.23,Rx_N,PF18052.2	'No_CC'	Disease resistance protein
TIR-NBS	Solyc12g097020.2	Solyc12g097020.2.1	TIR,PF01582.21,TIR_2,PF13676.7,NB-ARC,PF00931.23	'No_CC'	Disease resistance protein (TIR-NBS-LRR class)

## Sheet: Vitis vinifera
Class	Gene_id	protein_id	NBS_domain/ids	CC_domain_Predicted	Descript
NBS	VIT_200s0144g00120	VIT_200s0144g00120.1	Rx_N,PF18052.2,NB-ARC,PF00931.23	'No_CC'	gi|296083453|emb|CBI23411.3|unnamed protein product [Vitis vinifera]
NBS	VIT_200s0144g00190	VIT_200s0144g00190.1	Rx_N,PF18052.2,NB-ARC,PF00931.23	'No_CC'	gi|359495375|ref|XP_003634972.1|PREDICTED: putative disease resistance protein RGA3-like [Vitis vinifera]
NBS	VIT_200s0144g00220	VIT_200s0144g00220.1	NB-ARC,PF00931.23,Rx_N,PF18052.2	'No_CC'	gi|225470100|ref|XP_002271058.1|PREDICTED: disease resistance protein RGA2 [Vitis vinifera]
NBS	VIT_200s0144g00270	VIT_200s0144g00270.1	NB-ARC,PF00931.23,Rx_N,PF18052.2	'No_CC'	gi|225470100|ref|XP_002271058.1|PREDICTED: disease resistance protein RGA2 [Vitis vinifera]
TIR-NBS	VIT_200s0160g00100	VIT_200s0160g00100.1	TIR,PF01582.21,NB-ARC,PF00931.23,TIR_2,PF13676.7	'No_CC'	gi|297742842|emb|CBI35600.3|unnamed protein product [Vitis vinifera]
NBS-LRR	VIT_200s0160g00320	VIT_200s0160g00320.1	LRR_4,PF12799.8,LRR_8,PF13855.7,NB-ARC,PF00931.23	'No_CC'	gi|147859369|emb|CAN83953.1|hypothetical protein VITISV_018322 [Vitis vinifera]
TIR-NBS	VIT_200s0184g00120	VIT_200s0184g00120.1	TIR,PF01582.21,NB-ARC,PF00931.23,TIR_2,PF13676.7	'No_CC'	gi|297742842|emb|CBI35600.3|unnamed protein product [Vitis vinifera]
NBS-LRR	VIT_200s0226g00045	VIT_200s0226g00045.1	NB-ARC,PF00931.23,Rx_N,PF18052.2,LRR_8,PF13855.7	'No_CC'	gi|359495925|ref|XP_003635116.1|PREDICTED: putative disease resistance protein At1g58400-like [Vitis vinifera]
NBS-LRR	VIT_200s0226g00050	VIT_200s0226g00050.1	NB-ARC,PF00931.23,Rx_N,PF18052.2,LRR_8,PF13855.7	'No_CC'	gi|359495927|ref|XP_002272120.2|PREDICTED: putative disease resistance protein At1g59780-like [Vitis vinifera]
NBS-LRR	VIT_200s0226g00080	VIT_200s0226g00080.1	NB-ARC,PF00931.23,Rx_N,PF18052.2,LRR_8,PF13855.7,AAA_22,PF13401.7,LRR_4,PF12799.8	'No_CC'	gi|359495931|ref|XP_003635117.1|PREDICTED: probable disease resistance protein RDL6/RF9-like [Vitis vinifera]
NBS-LRR	VIT_200s0238g00060	VIT_200s0238g00060.2	NB-ARC,PF00931.23,LRR_4,PF12799.8,LRR_8,PF13855.7,LRR_3,PF07725.13	'No_CC'	gi|359496028|ref|XP_003635135.1|PREDICTED: putative disease resistance protein At4g11170-like [Vitis vinifera]
TIR-NBS-LRR	VIT_200s0238g00130	VIT_200s0238g00130.1	TIR,PF01582.21,NB-ARC,PF00931.23,TIR_2,PF13676.7,LRR_8,PF13855.7,LRR_4,PF12799.8	'No_CC'	gi|296090597|emb|CBI40966.3|unnamed protein product [Vitis vinifera]
NBS	VIT_200s0275g00060	VIT_200s0275g00060.1	NB-ARC,PF00931.23	'No_CC'	gi|147828745|emb|CAN72925.1|hypothetical protein VITISV_027143 [Vitis vinifera]
NBS-LRR	VIT_200s0276g00050	VIT_200s0276g00050.1	LRR_4,PF12799.8,NB-ARC,PF00931.23,LRR_8,PF13855.7	'No_CC'	gi|359495896|ref|XP_003635111.1|PREDICTED: putative disease resistance protein At3g14460-like [Vitis vinifera]
CC-NBS	VIT_200s0276g00070	VIT_200s0276g00070.1	NB-ARC,PF00931.23,Rx_N,PF18052.2,Retrotran_gag_2,PF14223.7	'CC_region'	gi|147858053|emb|CAN80341.1|hypothetical protein VITISV_028478 [Vitis vinifera]
TIR-NBS	VIT_200s0288g00010	VIT_200s0288g00010.1	TIR,PF01582.21,NB-ARC,PF00931.23,TIR_2,PF13676.7,NACHT,PF05729.13	'No_CC'	gi|359493295|ref|XP_002273513.2|PREDICTED: TMV resistance protein N-like [Vitis vinifera]
NBS	VIT_200s0335g00080	VIT_200s0335g00080.1	NB-ARC,PF00931.23,Rx_N,PF18052.2	'No_CC'	gi|359480367|ref|XP_003632438.1|PREDICTED: putative disease resistance protein At3g14460-like [Vitis vinifera]
NBS	VIT_200s0448g00020	VIT_200s0448g00020.1	NB-ARC,PF00931.23,Rx_N,PF18052.2	'No_CC'	gi|359496830|ref|XP_002269455.2|PREDICTED: probable disease resistance protein At1g58602-like [Vitis vinifera]
NBS-LRR	VIT_200s0467g00010	VIT_200s0467g00010.1	NB-ARC,PF00931.23,Rx_N,PF18052.2,LRR_4,PF12799.8,LRR_8,PF13855.7	'No_CC'	gi|359496869|ref|XP_002269619.2|PREDICTED: putative disease resistance protein At3g14460-like [Vitis vinifera]
NBS-LRR	VIT_200s0467g00030	VIT_200s0467g00030.1	NB-ARC,PF00931.23,Rx_N,PF18052.2,LRR_4,PF12799.8,LRR_8,PF13855.7,AAA_16,PF13191.7	'No_CC'	gi|147805811|emb|CAN60543.1|hypothetical protein VITISV_006249 [Vitis vinifera]
NBS-LRR	VIT_200s0487g00010	VIT_200s0487g00010.1	NB-ARC,PF00931.23,RPW8,PF05659.12,LRR_4,PF12799.8,LRR_8,PF13855.7	'No_CC'	gi|359496924|ref|XP_003635373.1|PREDICTED: probable disease resistance protein At5g66900-like [Vitis vinifera]
NBS	VIT_200s0487g00020	VIT_200s0487g00020.1	NB-ARC,PF00931.23	'No_CC'	gi|147783881|emb|CAN70251.1|hypothetical protein VITISV_020280 [Vitis vinifera]
CC-NBS-LRR	VIT_200s0487g00030	VIT_200s0487g00030.1	RPW8,PF05659.12,NB-ARC,PF00931.23,LRR_8,PF13855.7,AAA_22,PF13401.7,AAA_16,PF13191.7,ATPase_2,PF01637.19,LRR_4,PF12799.8	'CC_region'	gi|296088189|emb|CBI35701.3|unnamed protein product [Vitis vinifera]
NBS	VIT_200s0487g00050	VIT_200s0487g00050.1	RPW8,PF05659.12,NB-ARC,PF00931.23	'No_CC'	gi|359496928|ref|XP_003635374.1|PREDICTED: probable disease resistance protein At5g66900-like [Vitis vinifera]
NBS-LRR	VIT_200s0515g00020	VIT_200s0515g00020.1	NB-ARC,PF00931.23,Rx_N,PF18052.2,LRR_8,PF13855.7,LRR_4,PF12799.8,AAA_22,PF13401.7	'No_CC'	gi|359496974|ref|XP_002264069.2|PREDICTED: probable disease resistance RPP8-like protein 4-like [Vitis vinifera]
NBS	VIT_200s2178g00010	VIT_200s2178g00010.1	NB-ARC,PF00931.23,Rx_N,PF18052.2	'No_CC'	gi|147787515|emb|CAN77811.1|hypothetical protein VITISV_010343 [Vitis vinifera]
NBS-LRR	VIT_200s2390g00010	VIT_200s2390g00010.1	NB-ARC,PF00931.23,AAA_16,PF13191.7,LRR_4,PF12799.8,LRR_8,PF13855.7	'No_CC'	gi|359497792|ref|XP_003635643.1|PREDICTED: putative disease resistance RPP13-like protein 1-like, partial [Vitis vinifera]
NBS-LRR	VIT_200s2434g00005	VIT_200s2434g00005.1	NB-ARC,PF00931.23,LRR_8,PF13855.7,LRR_4,PF12799.8	'No_CC'	gi|359497804|ref|XP_003635649.1|PREDICTED: putative disease resistance RPP13-like protein 2-like [Vitis vinifera]
CC-NBS-LRR	VIT_201s0011g00950	VIT_201s0011g00950.1	NB-ARC,PF00931.23,Rx_N,PF18052.2,LRR_8,PF13855.7	'CC_region'	gi|225423561|ref|XP_002275042.1|PREDICTED: disease resistance protein RPM1 [Vitis vinifera]
NBS-LRR	VIT_201s0011g00960	VIT_201s0011g00960.1	NB-ARC,PF00931.23,Rx_N,PF18052.2,LRR_8,PF13855.7	'No_CC'	gi|359472795|ref|XP_002275080.2|PREDICTED: disease resistance protein RPM1-like [Vitis vinifera]
NBS	VIT_201s0011g00970	VIT_201s0011g00970.1	NB-ARC,PF00931.23,Rx_N,PF18052.2	'No_CC'	gi|359472793|ref|XP_002275153.2|PREDICTED: disease resistance protein RPM1-like [Vitis vinifera]
NBS-LRR	VIT_201s0011g00990	VIT_201s0011g00990.1	NB-ARC,PF00931.23,LRR_8,PF13855.7	'No_CC'	gi|359472791|ref|XP_002275250.2|PREDICTED: disease resistance protein RPM1-like [Vitis vinifera]
CC-NBS-LRR	VIT_201s0011g01000	VIT_201s0011g01000.1	NB-ARC,PF00931.23,Rx_N,PF18052.2,LRR_8,PF13855.7,AAA_22,PF13401.7,AAA_16,PF13191.7,AAA_30,PF13604.7,LRR_4,PF12799.8,ATP_bind_1,PF03029.18	'CC_region'	gi|147799045|emb|CAN63708.1|hypothetical protein VITISV_010416 [Vitis vinifera]
NBS-LRR	VIT_201s0011g01020	VIT_201s0011g01020.1	NB-ARC,PF00931.23,Rx_N,PF18052.2,LRR_8,PF13855.7	'No_CC'	gi|147814874|emb|CAN70306.1|hypothetical protein VITISV_024233 [Vitis vinifera]
NBS	VIT_201s0011g01030	VIT_201s0011g01030.1	E1-E2_ATPase,PF00122.21,NB-ARC,PF00931.23	'No_CC'	gi|297738038|emb|CBI27239.3|unnamed protein product [Vitis vinifera]
NBS	VIT_201s0011g01120	VIT_201s0011g01120.1	NB-ARC,PF00931.23,Rx_N,PF18052.2	'No_CC'	gi|225456092|ref|XP_002278041.1|PREDICTED: putative disease resistance protein RGA4 [Vitis vinifera]
NBS-LRR	VIT_201s0026g01120	VIT_201s0026g01120.1	LRR_8,PF13855.7,LRR_4,PF12799.8,NB-ARC,PF00931.23	'No_CC'	gi|359473396|ref|XP_002268358.2|PREDICTED: TMV resistance protein N-like [Vitis vinifera]
NBS-LRR	VIT_202s0012g02720	VIT_202s0012g02720.1	NB-ARC,PF00931.23,Rx_N,PF18052.2,LRR_4,PF12799.8,NACHT,PF05729.13	'No_CC'	gi|359474448|ref|XP_003631469.1|PREDICTED: disease resistance protein RPM1-like [Vitis vinifera]
NBS-LRR	VIT_202s0033g00520	VIT_202s0033g00520.5	LRR_8,PF13855.7,LRR_4,PF12799.8,NB-ARC,PF00931.23	'No_CC'	gi|296088415|emb|CBI37406.3|unnamed protein product [Vitis vinifera]
NBS	VIT_203s0017g00773	VIT_203s0017g00773.1	NB-ARC,PF00931.23,DAGK_cat,PF00781.25	'No_CC'	gi|147769684|emb|CAN69891.1|hypothetical protein VITISV_032862 [Vitis vinifera]
NBS-LRR	VIT_203s0017g00900	VIT_203s0017g00900.1	NB-ARC,PF00931.23,LRR_8,PF13855.7	'No_CC'	gi|296087453|emb|CBI34042.3|unnamed protein product [Vitis vinifera]
NBS-LRR	VIT_203s0017g00920	VIT_203s0017g00920.1	NB-ARC,PF00931.23,Rx_N,PF18052.2,LRR_8,PF13855.7	'No_CC'	gi|359475737|ref|XP_003631746.1|PREDICTED: probable disease resistance protein RDL6/RF9-like [Vitis vinifera]
NBS	VIT_203s0017g01591	VIT_203s0017g01591.1	NB-ARC,PF00931.23	'No_CC'	gi|296087506|emb|CBI34095.3|unnamed protein product [Vitis vinifera]
NBS	VIT_203s0017g01620	VIT_203s0017g01620.1	NB-ARC,PF00931.23	'No_CC'	gi|296087506|emb|CBI34095.3|unnamed protein product [Vitis vinifera]
NBS	VIT_203s0017g01635	VIT_203s0017g01635.1	NB-ARC,PF00931.23	'No_CC'	gi|296087506|emb|CBI34095.3|unnamed protein product [Vitis vinifera]
NBS	VIT_203s0017g01832	VIT_203s0017g01832.1	NB-ARC,PF00931.23	'No_CC'	gi|296087523|emb|CBI34112.3|unnamed protein product [Vitis vinifera]
NBS	VIT_203s0017g01834	VIT_203s0017g01834.1	NB-ARC,PF00931.23	'No_CC'	gi|147858986|emb|CAN80427.1|hypothetical protein VITISV_043220 [Vitis vinifera]
NBS	VIT_203s0017g01840	VIT_203s0017g01840.1	NB-ARC,PF00931.23	'No_CC'	gi|296087523|emb|CBI34112.3|unnamed protein product [Vitis vinifera]
NBS	VIT_203s0017g02086	VIT_203s0017g02086.1	NB-ARC,PF00931.23	'No_CC'	gi|296087506|emb|CBI34095.3|unnamed protein product [Vitis vinifera]
NBS-LRR	VIT_203s0038g01400	VIT_203s0038g01400.1	NB-ARC,PF00931.23,LRR_4,PF12799.8	'No_CC'	gi|297744682|emb|CBI37944.3|unnamed protein product [Vitis vinifera]
NBS	VIT_203s0038g01520	VIT_203s0038g01520.1	NB-ARC,PF00931.23,Rx_N,PF18052.2,AAA_22,PF13401.7,AAA_16,PF13191.7	'No_CC'	gi|225427904|ref|XP_002276742.1|PREDICTED: disease resistance protein RPP13-like [Vitis vinifera]
NBS	VIT_203s0038g01530	VIT_203s0038g01530.1	NB-ARC,PF00931.23,Rx_N,PF18052.2,AAA_22,PF13401.7,AAA_16,PF13191.7	'No_CC'	gi|147767609|emb|CAN71249.1|hypothetical protein VITISV_030153 [Vitis vinifera]
NBS	VIT_203s0038g01540	VIT_203s0038g01540.1	NB-ARC,PF00931.23,Rx_N,PF18052.2	'No_CC'	gi|147801701|emb|CAN72324.1|hypothetical protein VITISV_018384 [Vitis vinifera]
NBS	VIT_203s0038g01550	VIT_203s0038g01550.1	NB-ARC,PF00931.23,Rx_N,PF18052.2,AAA_16,PF13191.7	'No_CC'	gi|147801702|emb|CAN72325.1|hypothetical protein VITISV_018385 [Vitis vinifera]
NBS	VIT_203s0038g01580	VIT_203s0038g01580.1	NB-ARC,PF00931.23,AAA_22,PF13401.7,AAA_16,PF13191.7,AAA_14,PF13173.7	'No_CC'	gi|147779981|emb|CAN75534.1|hypothetical protein VITISV_009639 [Vitis vinifera]
CC-NBS	VIT_203s0038g01610	VIT_203s0038g01610.1	NB-ARC,PF00931.23,Rx_N,PF18052.2,AAA_22,PF13401.7	'CC_region'	gi|359474883|ref|XP_003631548.1|PREDICTED: probable disease resistance RPP8-like protein 2-like [Vitis vinifera]
NBS	VIT_203s0038g01620	VIT_203s0038g01620.1	NB-ARC,PF00931.23,Rx_N,PF18052.2,AAA_22,PF13401.7	'No_CC'	gi|359474883|ref|XP_003631548.1|PREDICTED: probable disease resistance RPP8-like protein 2-like [Vitis vinifera]
CC-NBS	VIT_203s0038g01630	VIT_203s0038g01630.1	NB-ARC,PF00931.23,Rx_N,PF18052.2,AAA_22,PF13401.7	'CC_region'	gi|359474881|ref|XP_003631547.1|PREDICTED: disease resistance protein RPP13-like [Vitis vinifera]
CC-NBS-LRR	VIT_203s0038g01670	VIT_203s0038g01670.4	NB-ARC,PF00931.23,Rx_N,PF18052.2,LRR_8,PF13855.7,AAA_22,PF13401.7	'CC_region'	gi|359474879|ref|XP_003631546.1|PREDICTED: disease resistance protein RPP13-like [Vitis vinifera]
NBS	VIT_203s0132g00305	VIT_203s0132g00305.1	NB-ARC,PF00931.23	'No_CC'	gi|147800242|emb|CAN77656.1|hypothetical protein VITISV_002459 [Vitis vinifera]
CC-NBS-LRR	VIT_204s0023g02380	VIT_204s0023g02380.1	NB-ARC,PF00931.23,Rx_N,PF18052.2,LRR_8,PF13855.7,LRR_4,PF12799.8	'CC_region'	gi|225431303|ref|XP_002268940.1|PREDICTED: disease resistance RPP13-like protein 4 [Vitis vinifera]
NBS	VIT_205s0020g04940	VIT_205s0020g04940.1	NB-ARC,PF00931.23	'No_CC'	gi|297737177|emb|CBI26378.3|unnamed protein product [Vitis vinifera]
NBS-LRR	VIT_205s0029g00750	VIT_205s0029g00750.1	NB-ARC,PF00931.23,LRR_4,PF12799.8,LRR_8,PF13855.7	'No_CC'	gi|298205188|emb|CBI17247.3|unnamed protein product [Vitis vinifera]
NBS	VIT_205s0029g00780	VIT_205s0029g00780.1	NB-ARC,PF00931.23	'No_CC'	gi|298205200|emb|CBI17259.3|unnamed protein product [Vitis vinifera]
TIR-NBS-LRR	VIT_205s0029g00870	VIT_205s0029g00870.1	TIR,PF01582.21,NB-ARC,PF00931.23,LRR_4,PF12799.8,TIR_2,PF13676.7,LRR_8,PF13855.7	'No_CC'	gi|298205188|emb|CBI17247.3|unnamed protein product [Vitis vinifera]
TIR-NBS-LRR	VIT_205s0029g00880	VIT_205s0029g00880.1	TIR,PF01582.21,NB-ARC,PF00931.23,TIR_2,PF13676.7,LRR_4,PF12799.8	'No_CC'	gi|298205187|emb|CBI17246.3|unnamed protein product [Vitis vinifera]
TIR-NBS-LRR	VIT_205s0051g00140	VIT_205s0051g00140.1	TIR,PF01582.21,NB-ARC,PF00931.23,LRR_4,PF12799.8,TIR_2,PF13676.7,LRR_8,PF13855.7,NACHT,PF05729.13	'No_CC'	gi|359477821|ref|XP_003632029.1|PREDICTED: TMV resistance protein N-like [Vitis vinifera]
NBS-LRR	VIT_205s0051g00170	VIT_205s0051g00170.1	NB-ARC,PF00931.23,LRR_4,PF12799.8,LRR_8,PF13855.7,NACHT,PF05729.13	'No_CC'	gi|297741885|emb|CBI33320.3|unnamed protein product [Vitis vinifera]
NBS-LRR	VIT_205s0051g00230	VIT_205s0051g00230.1	NB-ARC,PF00931.23,LRR_4,PF12799.8,LRR_8,PF13855.7,NACHT,PF05729.13	'No_CC'	gi|297741888|emb|CBI33323.3|unnamed protein product [Vitis vinifera]
NBS-LRR	VIT_205s0102g00826	VIT_205s0102g00826.1	NB-ARC,PF00931.23,LRR_8,PF13855.7	'No_CC'	gi|147795360|emb|CAN73884.1|hypothetical protein VITISV_018829 [Vitis vinifera]
NBS-LRR	VIT_205s0102g00870	VIT_205s0102g00870.1	NB-ARC,PF00931.23,LRR_8,PF13855.7,Rx_N,PF18052.2	'No_CC'	gi|297743817|emb|CBI36700.3|unnamed protein product [Vitis vinifera]
NBS-LRR	VIT_205s0102g00875	VIT_205s0102g00875.1	NB-ARC,PF00931.23,Rx_N,PF18052.2,LRR_8,PF13855.7,AAA_22,PF13401.7,AAA_14,PF13173.7,AAA_16,PF13191.7	'No_CC'	gi|225433948|ref|XP_002267553.1|PREDICTED: putative disease resistance protein At1g59780-like [Vitis vinifera]
NBS-LRR	VIT_205s0102g00890	VIT_205s0102g00890.1	NB-ARC,PF00931.23,LRR_8,PF13855.7,Rx_N,PF18052.2	'No_CC'	gi|147795360|emb|CAN73884.1|hypothetical protein VITISV_018829 [Vitis vinifera]
NBS-LRR	VIT_205s0102g00940	VIT_205s0102g00940.1	NB-ARC,PF00931.23,LRR_8,PF13855.7	'No_CC'	gi|297743823|emb|CBI36706.3|unnamed protein product [Vitis vinifera]
NBS	VIT_205s0102g00975	VIT_205s0102g00975.1	NB-ARC,PF00931.23,Rx_N,PF18052.2	'No_CC'	gi|359497804|ref|XP_003635649.1|PREDICTED: putative disease resistance RPP13-like protein 2-like [Vitis vinifera]
NBS-LRR	VIT_205s0102g01010	VIT_205s0102g01010.1	NB-ARC,PF00931.23,Rx_N,PF18052.2,LRR_8,PF13855.7	'No_CC'	gi|359478191|ref|XP_003632082.1|PREDICTED: uncharacterized protein LOC100852897 [Vitis vinifera]
NBS-LRR	VIT_205s0102g01030	VIT_205s0102g01030.1	NB-ARC,PF00931.23,Rx_N,PF18052.2,LRR_8,PF13855.7	'No_CC'	gi|359478191|ref|XP_003632082.1|PREDICTED: uncharacterized protein LOC100852897 [Vitis vinifera]
NBS-LRR	VIT_205s0102g01040	VIT_205s0102g01040.1	NB-ARC,PF00931.23,Rx_N,PF18052.2,LRR_8,PF13855.7	'No_CC'	gi|359478191|ref|XP_003632082.1|PREDICTED: uncharacterized protein LOC100852897 [Vitis vinifera]
NBS-LRR	VIT_205s0102g01055	VIT_205s0102g01055.1	NB-ARC,PF00931.23,LRR_8,PF13855.7,Rx_N,PF18052.2	'No_CC'	gi|147787515|emb|CAN77811.1|hypothetical protein VITISV_010343 [Vitis vinifera]
NBS-LRR	VIT_205s0102g01062	VIT_205s0102g01062.1	NB-ARC,PF00931.23,Rx_N,PF18052.2,LRR_8,PF13855.7	'No_CC'	gi|359478099|ref|XP_002269321.2|PREDICTED: uncharacterized protein LOC100259295 [Vitis vinifera]
NBS-LRR	VIT_205s0102g01064	VIT_205s0102g01064.1	NB-ARC,PF00931.23,Rx_N,PF18052.2,LRR_8,PF13855.7	'No_CC'	gi|359478101|ref|XP_003632069.1|PREDICTED: uncharacterized protein LOC100852873 [Vitis vinifera]
NBS-LRR	VIT_205s0102g01066	VIT_205s0102g01066.1	NB-ARC,PF00931.23,Rx_N,PF18052.2,LRR_8,PF13855.7	'No_CC'	gi|359478101|ref|XP_003632069.1|PREDICTED: uncharacterized protein LOC100852873 [Vitis vinifera]
NBS-LRR	VIT_205s0102g01068	VIT_205s0102g01068.1	NB-ARC,PF00931.23,Rx_N,PF18052.2,LRR_8,PF13855.7	'No_CC'	gi|359478103|ref|XP_003632070.1|PREDICTED: disease resistance protein RPP8-like [Vitis vinifera]
NBS-LRR	VIT_205s0102g01100	VIT_205s0102g01100.1	NB-ARC,PF00931.23,Rx_N,PF18052.2,LRR_8,PF13855.7	'No_CC'	gi|297743835|emb|CBI36718.3|unnamed protein product [Vitis vinifera]
NBS	VIT_206s0009g01350	VIT_206s0009g01350.1	NB-ARC,PF00931.23,Rx_N,PF18052.2	'No_CC'	gi|296083985|emb|CBI24373.3|unnamed protein product [Vitis vinifera]
NBS-LRR	VIT_206s0009g01360	VIT_206s0009g01360.1	NB-ARC,PF00931.23,LRR_8,PF13855.7,Rx_N,PF18052.2	'No_CC'	gi|147856116|emb|CAN80288.1|hypothetical protein VITISV_006820 [Vitis vinifera]
NBS-LRR	VIT_206s0009g01630	VIT_206s0009g01630.1	NB-ARC,PF00931.23,Rx_N,PF18052.2,LRR_4,PF12799.8,LRR_8,PF13855.7	'No_CC'	gi|359479319|ref|XP_003632256.1|PREDICTED: putative disease resistance protein At3g14460-like [Vitis vinifera]
CC-NBS-LRR	VIT_206s0009g01660	VIT_206s0009g01660.1	NB-ARC,PF00931.23,LRR_8,PF13855.7,LRR_4,PF12799.8,TniB,PF05621.12	'CC_region'	gi|225436007|ref|XP_002270165.1|PREDICTED: disease resistance protein At4g27190-like [Vitis vinifera]
NBS-LRR	VIT_206s0061g00170	VIT_206s0061g00170.1	NB-ARC,PF00931.23,Rx_N,PF18052.2,LRR_8,PF13855.7	'No_CC'	gi|297734948|emb|CBI17182.3|unnamed protein product [Vitis vinifera]
NBS-LRR	VIT_207s0005g06180	VIT_207s0005g06180.1	NB-ARC,PF00931.23,Rx_N,PF18052.2,LRR_8,PF13855.7	'No_CC'	gi|225465431|ref|XP_002265419.1|PREDICTED: disease resistance protein RPM1-like [Vitis vinifera]
NBS-LRR	VIT_207s0005g06200	VIT_207s0005g06200.1	NB-ARC,PF00931.23,Rx_N,PF18052.2,LRR_8,PF13855.7	'No_CC'	gi|225465433|ref|XP_002265568.1|PREDICTED: disease resistance protein RPM1-like [Vitis vinifera]
NBS	VIT_207s0005g06210	VIT_207s0005g06210.1	NB-ARC,PF00931.23,Rx_N,PF18052.2	'No_CC'	gi|359480122|ref|XP_002265617.2|PREDICTED: disease resistance protein RPM1-like [Vitis vinifera]
NBS	VIT_207s0005g06220	VIT_207s0005g06220.1	NB-ARC,PF00931.23,Rx_N,PF18052.2	'No_CC'	gi|359480124|ref|XP_003632405.1|PREDICTED: disease resistance protein RPM1-like [Vitis vinifera]
NBS	VIT_207s0005g06240	VIT_207s0005g06240.1	NB-ARC,PF00931.23	'No_CC'	gi|297744337|emb|CBI37307.3|unnamed protein product [Vitis vinifera]
NBS	VIT_207s0095g00040	VIT_207s0095g00040.1	NB-ARC,PF00931.23,Rx_N,PF18052.2	'No_CC'	gi|359480367|ref|XP_003632438.1|PREDICTED: putative disease resistance protein At3g14460-like [Vitis vinifera]
NBS	VIT_207s0095g00100	VIT_207s0095g00100.1	NB-ARC,PF00931.23,Rx_N,PF18052.2	'No_CC'	gi|147775060|emb|CAN77204.1|hypothetical protein VITISV_014782 [Vitis vinifera]
CC-NBS-LRR	VIT_207s0141g00700	VIT_207s0141g00700.1	NB-ARC,PF00931.23,Rx_N,PF18052.2,LRR_8,PF13855.7,LRR_4,PF12799.8	'CC_region'	gi|359494768|ref|XP_002263518.2|PREDICTED: putative disease resistance protein At3g14460-like [Vitis vinifera]
NBS-LRR	VIT_207s0141g01030	VIT_207s0141g01030.1	NB-ARC,PF00931.23,Rx_N,PF18052.2,LRR_4,PF12799.8,LRR_8,PF13855.7	'No_CC'	gi|359494768|ref|XP_002263518.2|PREDICTED: putative disease resistance protein At3g14460-like [Vitis vinifera]
NBS	VIT_207s0197g00090	VIT_207s0197g00090.1	RPW8,PF05659.12,NB-ARC,PF00931.23	'No_CC'	gi|359480451|ref|XP_002263407.2|PREDICTED: probable disease resistance protein At5g66900-like [Vitis vinifera]
NBS	VIT_207s0197g00096	VIT_207s0197g00096.2	RPW8,PF05659.12,NB-ARC,PF00931.23	'No_CC'	gi|302144159|emb|CBI23286.3|unnamed protein product [Vitis vinifera]
CC-NBS	VIT_207s0197g00130	VIT_207s0197g00130.1	RPW8,PF05659.12,NB-ARC,PF00931.23	'CC_region'	gi|302144163|emb|CBI23290.3|unnamed protein product [Vitis vinifera]
CC-NBS-LRR	VIT_207s0197g00140	VIT_207s0197g00140.1	RPW8,PF05659.12,NB-ARC,PF00931.23,LRR_8,PF13855.7,LRR_4,PF12799.8	'CC_region'	gi|359480455|ref|XP_003632465.1|PREDICTED: probable disease resistance protein At5g66900-like [Vitis vinifera]
NBS-LRR	VIT_207s0197g00170	VIT_207s0197g00170.1	RPW8,PF05659.12,NB-ARC,PF00931.23,LRR_8,PF13855.7,LRR_4,PF12799.8	'No_CC'	gi|359480445|ref|XP_003632464.1|PREDICTED: probable disease resistance protein At5g66900-like [Vitis vinifera]
CC-NBS-LRR	VIT_207s0197g00210	VIT_207s0197g00210.1	RPW8,PF05659.12,NB-ARC,PF00931.23,LRR_8,PF13855.7,LRR_4,PF12799.8	'CC_region'	gi|359480455|ref|XP_003632465.1|PREDICTED: probable disease resistance protein At5g66900-like [Vitis vinifera]
NBS	VIT_207s0197g00230	VIT_207s0197g00230.1	RPW8,PF05659.12,NB-ARC,PF00931.23	'No_CC'	gi|359480455|ref|XP_003632465.1|PREDICTED: probable disease resistance protein At5g66900-like [Vitis vinifera]
CC-NBS-LRR	VIT_207s0197g00240	VIT_207s0197g00240.1	RPW8,PF05659.12,NB-ARC,PF00931.23,LRR_4,PF12799.8,LRR_8,PF13855.7	'CC_region'	gi|359480459|ref|XP_002265449.2|PREDICTED: probable disease resistance protein At5g66900-like [Vitis vinifera]
NBS-LRR	VIT_207s0197g00250	VIT_207s0197g00250.1	RPW8,PF05659.12,NB-ARC,PF00931.23,LRR_4,PF12799.8,AAA_22,PF13401.7	'No_CC'	gi|359480461|ref|XP_002268207.2|PREDICTED: probable disease resistance protein At5g66900-like [Vitis vinifera]
CC-NBS-LRR	VIT_208s0007g08420	VIT_208s0007g08420.1	NB-ARC,PF00931.23,Rx_N,PF18052.2,LRR_4,PF12799.8	'CC_region'	gi|225441815|ref|XP_002277987.1|PREDICTED: putative disease resistance protein RGA3-like [Vitis vinifera]
NBS-LRR	VIT_208s0007g08440	VIT_208s0007g08440.1	NB-ARC,PF00931.23,LRR_8,PF13855.7,LRR_4,PF12799.8	'No_CC'	gi|147777286|emb|CAN69089.1|hypothetical protein VITISV_009157 [Vitis vinifera]
CC-NBS	VIT_209s0002g00240	VIT_209s0002g00240.1	NB-ARC,PF00931.23	'CC_region'	gi|225442539|ref|XP_002278938.1|PREDICTED: probable disease resistance protein At5g63020 [Vitis vinifera]
NBS-LRR	VIT_209s0002g00250	VIT_209s0002g00250.1	LRR_8,PF13855.7,NB-ARC,PF00931.23,LRR_4,PF12799.8,LRR_9,PF14580.7	'No_CC'	gi|296088271|emb|CBI36497.3|unnamed protein product [Vitis vinifera]
CC-NBS	VIT_209s0002g00270	VIT_209s0002g00270.1	NB-ARC,PF00931.23	'CC_region'	gi|225470150|ref|XP_002267120.1|PREDICTED: probable disease resistance protein At5g63020-like [Vitis vinifera]
CC-NBS-LRR	VIT_209s0002g03270	VIT_209s0002g03270.1	NB-ARC,PF00931.23,LRR_8,PF13855.7	'CC_region'	gi|359482559|ref|XP_002277748.2|PREDICTED: disease resistance protein RPS5-like [Vitis vinifera]
CC-NBS-LRR	VIT_209s0002g03300	VIT_209s0002g03300.1	NB-ARC,PF00931.23,LRR_8,PF13855.7	'CC_region'	gi|359482561|ref|XP_002277853.2|PREDICTED: probable disease resistance protein At5g63020-like [Vitis vinifera]
CC-NBS	VIT_209s0002g03790	VIT_209s0002g03790.1	NB-ARC,PF00931.23	'CC_region'	gi|359482574|ref|XP_003632788.1|PREDICTED: probable disease resistance protein At1g12280-like [Vitis vinifera]
CC-NBS-LRR	VIT_209s0002g03800	VIT_209s0002g03800.1	NB-ARC,PF00931.23,LRR_8,PF13855.7	'CC_region'	gi|297743218|emb|CBI36085.3|unnamed protein product [Vitis vinifera]
NBS-LRR	VIT_209s0002g03820	VIT_209s0002g03820.1	NB-ARC,PF00931.23,LRR_8,PF13855.7,LRR_4,PF12799.8	'No_CC'	gi|297743220|emb|CBI36087.3|unnamed protein product [Vitis vinifera]
CC-NBS	VIT_209s0002g03840	VIT_209s0002g03840.1	NB-ARC,PF00931.23	'CC_region'	gi|225442517|ref|XP_002278567.1|PREDICTED: probable disease resistance protein At5g63020-like [Vitis vinifera]
CC-NBS	VIT_209s0002g03846	VIT_209s0002g03846.1	NB-ARC,PF00931.23	'CC_region'	gi|359482574|ref|XP_003632788.1|PREDICTED: probable disease resistance protein At1g12280-like [Vitis vinifera]
NBS	VIT_209s0002g03852	VIT_209s0002g03852.1	NB-ARC,PF00931.23	'No_CC'	gi|359482574|ref|XP_003632788.1|PREDICTED: probable disease resistance protein At1g12280-like [Vitis vinifera]
CC-NBS-LRR	VIT_209s0002g03860	VIT_209s0002g03860.1	NB-ARC,PF00931.23,LRR_8,PF13855.7	'CC_region'	gi|225442519|ref|XP_002278659.1|PREDICTED: disease resistance protein RFL1 [Vitis vinifera]
CC-NBS-LRR	VIT_209s0002g03870	VIT_209s0002g03870.1	NB-ARC,PF00931.23,LRR_8,PF13855.7	'CC_region'	gi|359482577|ref|XP_002278676.2|PREDICTED: probable disease resistance protein At5g63020-like [Vitis vinifera]
CC-NBS-LRR	VIT_209s0002g03980	VIT_209s0002g03980.1	NB-ARC,PF00931.23,LRR_8,PF13855.7,LRR_4,PF12799.8	'CC_region'	gi|225442539|ref|XP_002278938.1|PREDICTED: probable disease resistance protein At5g63020 [Vitis vinifera]
NBS-LRR	VIT_209s0002g04420	VIT_209s0002g04420.1	NB-ARC,PF00931.23,LRR_8,PF13855.7	'No_CC'	gi|297743268|emb|CBI36135.3|unnamed protein product [Vitis vinifera]
CC-NBS-LRR	VIT_209s0002g04890	VIT_209s0002g04890.1	NB-ARC,PF00931.23,LRR_8,PF13855.7	'CC_region'	gi|225442689|ref|XP_002280108.1|PREDICTED: disease resistance protein RPS5-like [Vitis vinifera]
CC-NBS	VIT_209s0002g04910	VIT_209s0002g04910.1	NB-ARC,PF00931.23,NACHT,PF05729.13	'CC_region'	gi|297743309|emb|CBI36176.3|unnamed protein product [Vitis vinifera]
CC-NBS-LRR	VIT_209s0002g04913	VIT_209s0002g04913.1	NB-ARC,PF00931.23,LRR_8,PF13855.7	'CC_region'	gi|147815553|emb|CAN70524.1|hypothetical protein VITISV_010211 [Vitis vinifera]
NBS	VIT_209s0002g04935	VIT_209s0002g04935.1	NB-ARC,PF00931.23	'No_CC'	gi|359482635|ref|XP_002280554.2|PREDICTED: probable disease resistance protein At1g61190-like [Vitis vinifera]
NBS-LRR	VIT_209s0002g04940	VIT_209s0002g04940.2	NB-ARC,PF00931.23,LRR_8,PF13855.7	'No_CC'	gi|297743311|emb|CBI36178.3|unnamed protein product [Vitis vinifera]
CC-NBS-LRR	VIT_209s0002g04950	VIT_209s0002g04950.1	NB-ARC,PF00931.23,LRR_8,PF13855.7	'CC_region'	gi|359482619|ref|XP_003632794.1|PREDICTED: disease resistance protein RPS5-like [Vitis vinifera]
NBS	VIT_209s0002g04980	VIT_209s0002g04980.1	NB-ARC,PF00931.23,NACHT,PF05729.13	'No_CC'	gi|297743316|emb|CBI36183.3|unnamed protein product [Vitis vinifera]
CC-NBS-LRR	VIT_209s0002g05000	VIT_209s0002g05000.2	NB-ARC,PF00931.23,LRR_8,PF13855.7	'CC_region'	gi|359482621|ref|XP_002280315.2|PREDICTED: disease resistance protein RPS5-like [Vitis vinifera]
NBS	VIT_209s0002g05015	VIT_209s0002g05015.1	NB-ARC,PF00931.23	'No_CC'	gi|147805347|emb|CAN74100.1|hypothetical protein VITISV_028592 [Vitis vinifera]
CC-NBS-LRR	VIT_209s0002g05040	VIT_209s0002g05040.1	NB-ARC,PF00931.23,LRR_8,PF13855.7	'CC_region'	gi|225442703|ref|XP_002280373.1|PREDICTED: disease resistance protein RPS5-like [Vitis vinifera]
CC-NBS-LRR	VIT_209s0002g05050	VIT_209s0002g05050.1	NB-ARC,PF00931.23,LRR_8,PF13855.7	'CC_region'	gi|225442705|ref|XP_002280385.1|PREDICTED: disease resistance protein RPS5 [Vitis vinifera]
NBS	VIT_209s0002g05062	VIT_209s0002g05062.1	NB-ARC,PF00931.23	'No_CC'	gi|225442705|ref|XP_002280385.1|PREDICTED: disease resistance protein RPS5 [Vitis vinifera]
CC-NBS-LRR	VIT_209s0002g05070	VIT_209s0002g05070.1	NB-ARC,PF00931.23,LRR_8,PF13855.7	'CC_region'	gi|225442707|ref|XP_002280432.1|PREDICTED: disease resistance protein RPS5-like [Vitis vinifera]
CC-NBS-LRR	VIT_209s0002g05220	VIT_209s0002g05220.1	NB-ARC,PF00931.23,LRR_8,PF13855.7	'CC_region'	gi|359482635|ref|XP_002280554.2|PREDICTED: probable disease resistance protein At1g61190-like [Vitis vinifera]
NBS	VIT_209s0002g05830	VIT_209s0002g05830.1	NB-ARC,PF00931.23	'No_CC'	gi|225442811|ref|XP_002281180.1|PREDICTED: disease resistance protein RPS5-like [Vitis vinifera]
CC-NBS	VIT_209s0002g05840	VIT_209s0002g05840.1	NB-ARC,PF00931.23,AAA,PF00004.30	'CC_region'	gi|225442813|ref|XP_002281195.1|PREDICTED: disease resistance protein RPS5-like [Vitis vinifera]
CC-NBS-LRR	VIT_209s0002g05870	VIT_209s0002g05870.2	NB-ARC,PF00931.23,ATPase_2,PF01637.19,AAA_16,PF13191.7,NACHT,PF05729.13,AAA_14,PF13173.7,AAA_22,PF13401.7,LRR_8,PF13855.7	'CC_region'	gi|359482664|ref|XP_002281268.2|PREDICTED: probable disease resistance protein At1g12280-like [Vitis vinifera]
CC-NBS-LRR	VIT_209s0002g05920	VIT_209s0002g05920.2	NB-ARC,PF00931.23,LRR_8,PF13855.7	'CC_region'	gi|297743385|emb|CBI36252.3|unnamed protein product [Vitis vinifera]
NBS	VIT_209s0002g06133	VIT_209s0002g06133.1	NB-ARC,PF00931.23	'No_CC'	gi|359482672|ref|XP_003632805.1|PREDICTED: probable disease resistance protein At1g12280-like [Vitis vinifera]
NBS-LRR	VIT_209s0002g06140	VIT_209s0002g06140.1	NB-ARC,PF00931.23,LRR_8,PF13855.7,LRR_4,PF12799.8,LRR_9,PF14580.7	'No_CC'	gi|225462595|ref|XP_002270572.1|PREDICTED: probable disease resistance protein At5g63020-like [Vitis vinifera]
NBS-LRR	VIT_209s0002g06152	VIT_209s0002g06152.1	NB-ARC,PF00931.23,LRR_8,PF13855.7,LRR_4,PF12799.8,LRR_9,PF14580.7	'No_CC'	gi|225442861|ref|XP_002281498.1|PREDICTED: probable disease resistance protein At1g12280-like [Vitis vinifera]
NBS-LRR	VIT_209s0002g06202	VIT_209s0002g06202.1	NB-ARC,PF00931.23,LRR_8,PF13855.7,LRR_4,PF12799.8,LRR_9,PF14580.7	'No_CC'	gi|359482672|ref|XP_003632805.1|PREDICTED: probable disease resistance protein At1g12280-like [Vitis vinifera]
NBS-LRR	VIT_209s0002g06210	VIT_209s0002g06210.2	NB-ARC,PF00931.23,LRR_8,PF13855.7,LRR_4,PF12799.8,LRR_9,PF14580.7	'No_CC'	gi|359482674|ref|XP_002281708.2|PREDICTED: probable disease resistance protein At1g12280-like [Vitis vinifera]
CC-NBS-LRR	VIT_209s0002g06260	VIT_209s0002g06260.1	NB-ARC,PF00931.23,LRR_8,PF13855.7,LRR_4,PF12799.8,LRR_9,PF14580.7	'CC_region'	gi|359482676|ref|XP_002281742.2|PREDICTED: probable disease resistance protein At5g63020-like [Vitis vinifera]
NBS	VIT_209s0002g06320	VIT_209s0002g06320.1	NB-ARC,PF00931.23	'No_CC'	gi|359482679|ref|XP_003632806.1|PREDICTED: uncharacterized protein LOC100261821 [Vitis vinifera]
CC-NBS	VIT_209s0002g07890	VIT_209s0002g07890.1	Rx_N,PF18052.2,NB-ARC,PF00931.23	'CC_region'	gi|359482788|ref|XP_003632840.1|PREDICTED: putative disease resistance protein RGA4-like [Vitis vinifera]
CC-NBS-LRR	VIT_209s0002g08020	VIT_209s0002g08020.1	NB-ARC,PF00931.23,Rx_N,PF18052.2,LRR_8,PF13855.7,LRR_4,PF12799.8	'CC_region'	gi|359482790|ref|XP_002268671.2|PREDICTED: putative disease resistance protein RGA4-like [Vitis vinifera]
NBS-LRR	VIT_209s0002g08160	VIT_209s0002g08160.1	NB-ARC,PF00931.23,Rx_N,PF18052.2,LRR_4,PF12799.8,LRR_8,PF13855.7	'No_CC'	gi|147825450|emb|CAN71072.1|hypothetical protein VITISV_000086 [Vitis vinifera]
CC-NBS	VIT_209s0002g08240	VIT_209s0002g08240.1	NB-ARC,PF00931.23,Rx_N,PF18052.2,AAA_22,PF13401.7	'CC_region'	gi|359482788|ref|XP_003632840.1|PREDICTED: putative disease resistance protein RGA4-like [Vitis vinifera]
CC-NBS-LRR	VIT_209s0002g08290	VIT_209s0002g08290.1	NB-ARC,PF00931.23,Rx_N,PF18052.2,LRR_4,PF12799.8,LRR_8,PF13855.7	'CC_region'	gi|359482790|ref|XP_002268671.2|PREDICTED: putative disease resistance protein RGA4-like [Vitis vinifera]
CC-NBS-LRR	VIT_209s0002g08300	VIT_209s0002g08300.1	NB-ARC,PF00931.23,Rx_N,PF18052.2,LRR_4,PF12799.8	'CC_region'	gi|225463558|ref|XP_002267795.1|PREDICTED: putative disease resistance protein RGA3-like [Vitis vinifera]
NBS-LRR	VIT_209s0002g09276	VIT_209s0002g09276.1	NB-ARC,PF00931.23,LRR_8,PF13855.7,LRR_4,PF12799.8	'No_CC'	gi|225443118|ref|XP_002273312.1|PREDICTED: disease resistance protein At4g27190-like [Vitis vinifera]
NBS	VIT_209s0002g09290	VIT_209s0002g09290.1	Rx_N,PF18052.2,NB-ARC,PF00931.23	'No_CC'	gi|225470202|ref|XP_002269053.1|PREDICTED: putative disease resistance protein RGA3-like [Vitis vinifera]
CC-NBS-LRR	VIT_209s0018g00480	VIT_209s0018g00480.1	NB-ARC,PF00931.23,LRR_8,PF13855.7,LRR_4,PF12799.8,LRR_9,PF14580.7	'CC_region'	gi|225443158|ref|XP_002263674.1|PREDICTED: probable disease resistance protein At5g63020-like [Vitis vinifera]
CC-NBS	VIT_209s0070g00350	VIT_209s0070g00350.1	NB-ARC,PF00931.23	'CC_region'	gi|359482559|ref|XP_002277748.2|PREDICTED: disease resistance protein RPS5-like [Vitis vinifera]
NBS	VIT_209s0096g00140	VIT_209s0096g00140.1	NB-ARC,PF00931.23	'No_CC'	gi|297741952|emb|CBI33397.3|unnamed protein product [Vitis vinifera]
NBS-LRR	VIT_209s0096g00200	VIT_209s0096g00200.1	NB-ARC,PF00931.23,LRR_8,PF13855.7,LRR_4,PF12799.8	'No_CC'	gi|359483035|ref|XP_003632886.1|PREDICTED: probable disease resistance protein At5g63020-like [Vitis vinifera]
CC-NBS-LRR	VIT_209s0096g00420	VIT_209s0096g00420.1	NB-ARC,PF00931.23,LRR_8,PF13855.7,LRR_4,PF12799.8	'CC_region'	gi|225462595|ref|XP_002270572.1|PREDICTED: probable disease resistance protein At5g63020-like [Vitis vinifera]
CC-NBS	VIT_209s0096g00740	VIT_209s0096g00740.1	NB-ARC,PF00931.23	'CC_region'	gi|147838868|emb|CAN70333.1|hypothetical protein VITISV_011431 [Vitis vinifera]
CC-NBS-LRR	VIT_209s0096g00760	VIT_209s0096g00760.1	NB-ARC,PF00931.23,LRR_8,PF13855.7	'CC_region'	gi|225470150|ref|XP_002267120.1|PREDICTED: probable disease resistance protein At5g63020-like [Vitis vinifera]
NBS	VIT_209s0096g00830	VIT_209s0096g00830.1	NB-ARC,PF00931.23	'No_CC'	gi|297741980|emb|CBI33425.3|unnamed protein product [Vitis vinifera]
NBS	VIT_209s0096g00885	VIT_209s0096g00885.1	NB-ARC,PF00931.23	'No_CC'	gi|147781078|emb|CAN77098.1|hypothetical protein VITISV_037080 [Vitis vinifera]
CC-NBS	VIT_209s0096g00930	VIT_209s0096g00930.1	Rx_N,PF18052.2,NB-ARC,PF00931.23	'CC_region'	gi|297741984|emb|CBI33429.3|unnamed protein product [Vitis vinifera]
CC-NBS-LRR	VIT_210s0042g00250	VIT_210s0042g00250.1	NB-ARC,PF00931.23,LRR_8,PF13855.7,LRR_4,PF12799.8,NACHT,PF05729.13	'CC_region'	gi|296085275|emb|CBI29007.3|unnamed protein product [Vitis vinifera]
NBS-LRR	VIT_210s0042g00370	VIT_210s0042g00370.1	NB-ARC,PF00931.23,NACHT,PF05729.13,LRR_8,PF13855.7,LRR_4,PF12799.8	'No_CC'	gi|359484056|ref|XP_002268669.2|PREDICTED: uncharacterized protein LOC100256661 [Vitis vinifera]
CC-NBS-LRR	VIT_210s0042g00460	VIT_210s0042g00460.1	NB-ARC,PF00931.23,LRR_8,PF13855.7,NACHT,PF05729.13,LRR_4,PF12799.8,ATPase_2,PF01637.19	'CC_region'	gi|147782989|emb|CAN68563.1|hypothetical protein VITISV_012099 [Vitis vinifera]
NBS-LRR	VIT_210s0071g00150	VIT_210s0071g00150.1	NB-ARC,PF00931.23,RPW8,PF05659.12,LRR_8,PF13855.7,LRR_4,PF12799.8,AAA_16,PF13191.7,NACHT,PF05729.13	'No_CC'	gi|225463699|ref|XP_002276747.1|PREDICTED: probable disease resistance protein At5g66900-like [Vitis vinifera]
NBS-LRR	VIT_210s0071g00190	VIT_210s0071g00190.1	NB-ARC,PF00931.23,RPW8,PF05659.12,LRR_8,PF13855.7	'No_CC'	gi|297742767|emb|CBI35401.3|unnamed protein product [Vitis vinifera]
NBS-LRR	VIT_210s0071g00200	VIT_210s0071g00200.1	NB-ARC,PF00931.23,RPW8,PF05659.12,AAA_22,PF13401.7,LRR_4,PF12799.8	'No_CC'	gi|225463693|ref|XP_002276590.1|PREDICTED: probable disease resistance protein At5g66900 isoform 1 [Vitis vinifera]
NBS	VIT_211s0016g01860	VIT_211s0016g01860.1	NB-ARC,PF00931.23	'No_CC'	gi|297738634|emb|CBI27879.3|unnamed protein product [Vitis vinifera]
NBS	VIT_211s0016g03990	VIT_211s0016g03990.1	NB-ARC,PF00931.23,Rx_N,PF18052.2,AAA_22,PF13401.7	'No_CC'	gi|225445258|ref|XP_002281054.1|PREDICTED: disease resistance protein RPP13-like [Vitis vinifera]
NBS	VIT_211s0037g01270	VIT_211s0037g01270.1	NB-ARC,PF00931.23	'No_CC'	gi|147787894|emb|CAN71751.1|hypothetical protein VITISV_040594 [Vitis vinifera]
NBS-LRR	VIT_211s0052g00200	VIT_211s0052g00200.2	NB-ARC,PF00931.23,LRR_4,PF12799.8,LRR_8,PF13855.7	'No_CC'	gi|297735461|emb|CBI17901.3|unnamed protein product [Vitis vinifera]
CC-NBS-LRR	VIT_211s0052g00270	VIT_211s0052g00270.1	NB-ARC,PF00931.23,LRR_8,PF13855.7,LRR_4,PF12799.8	'CC_region'	gi|297735454|emb|CBI17894.3|unnamed protein product [Vitis vinifera]
NBS	VIT_212s0028g00950	VIT_212s0028g00950.1	NB-ARC,PF00931.23	'No_CC'	gi|225448417|ref|XP_002271819.1|PREDICTED: disease resistance RPP8-like protein 3-like [Vitis vinifera]
TIR-NBS-LRR	VIT_212s0034g00850	VIT_212s0034g00850.1	LRR_4,PF12799.8,LRR_8,PF13855.7,TIR,PF01582.21,NB-ARC,PF00931.23,TIR_2,PF13676.7,LRR_1,PF00560.34,NACHT,PF05729.13	'No_CC'	gi|225448269|ref|XP_002270337.1|PREDICTED: TMV resistance protein N-like [Vitis vinifera]
TIR-NBS-LRR	VIT_212s0034g00910	VIT_212s0034g00910.1	TIR,PF01582.21,NB-ARC,PF00931.23,LRR_8,PF13855.7,LRR_4,PF12799.8,TIR_2,PF13676.7	'No_CC'	gi|298204609|emb|CBI23884.3|unnamed protein product [Vitis vinifera]
NBS-LRR	VIT_212s0034g01030	VIT_212s0034g01030.1	NB-ARC,PF00931.23,Rx_N,PF18052.2,LRR_4,PF12799.8,LRR_8,PF13855.7	'No_CC'	gi|359486088|ref|XP_002273807.2|PREDICTED: putative disease resistance RPP13-like protein 1-like [Vitis vinifera]
NBS-LRR	VIT_212s0034g01070	VIT_212s0034g01070.2	NB-ARC,PF00931.23,Rx_N,PF18052.2,LRR_4,PF12799.8,LRR_8,PF13855.7	'No_CC'	gi|359486086|ref|XP_002273714.2|PREDICTED: putative disease resistance RPP13-like protein 1-like [Vitis vinifera]
TIR-NBS-LRR	VIT_212s0034g01270	VIT_212s0034g01270.1	TIR,PF01582.21,NB-ARC,PF00931.23,TIR_2,PF13676.7,LRR_8,PF13855.7,LRR_4,PF12799.8,NACHT,PF05729.13,AAA_16,PF13191.7	'No_CC'	gi|359486075|ref|XP_002273047.2|PREDICTED: TMV resistance protein N-like [Vitis vinifera]
TIR-NBS-LRR	VIT_212s0034g01350	VIT_212s0034g01350.1	TIR,PF01582.21,TIR_2,PF13676.7,LRR_4,PF12799.8,LRR_8,PF13855.7,NB-ARC,PF00931.23	'No_CC'	gi|298204574|emb|CBI23849.3|unnamed protein product [Vitis vinifera]
NBS	VIT_212s0034g01460	VIT_212s0034g01460.1	NB-ARC,PF00931.23,Rx_N,PF18052.2	'No_CC'	gi|359486065|ref|XP_003633380.1|PREDICTED: putative disease resistance RPP13-like protein 1-like [Vitis vinifera]
NBS-LRR	VIT_212s0034g01470	VIT_212s0034g01470.1	NB-ARC,PF00931.23,LRR_4,PF12799.8,LRR_8,PF13855.7	'No_CC'	gi|147841491|emb|CAN77618.1|hypothetical protein VITISV_037153 [Vitis vinifera]
NBS-LRR	VIT_212s0034g01480	VIT_212s0034g01480.3	NB-ARC,PF00931.23,Rx_N,PF18052.2,LRR_4,PF12799.8,LRR_8,PF13855.7	'No_CC'	gi|359486061|ref|XP_002271818.2|PREDICTED: putative disease resistance protein At3g14460-like [Vitis vinifera]
NBS-LRR	VIT_212s0034g01490	VIT_212s0034g01490.1	NB-ARC,PF00931.23,Rx_N,PF18052.2,LRR_8,PF13855.7,LRR_4,PF12799.8,AAA_16,PF13191.7	'No_CC'	gi|298204560|emb|CBI23835.3|unnamed protein product [Vitis vinifera]
NBS	VIT_212s0034g01580	VIT_212s0034g01580.1	NB-ARC,PF00931.23,Rx_N,PF18052.2	'No_CC'	gi|147841490|emb|CAN77617.1|hypothetical protein VITISV_037152 [Vitis vinifera]
NBS	VIT_212s0034g01625	VIT_212s0034g01625.1	NB-ARC,PF00931.23	'No_CC'	gi|147780319|emb|CAN70245.1|hypothetical protein VITISV_027660 [Vitis vinifera]
NBS-LRR	VIT_212s0034g01630	VIT_212s0034g01630.1	NB-ARC,PF00931.23,Rx_N,PF18052.2,LRR_4,PF12799.8,LRR_8,PF13855.7,AAA_16,PF13191.7	'No_CC'	gi|147780319|emb|CAN70245.1|hypothetical protein VITISV_027660 [Vitis vinifera]
NBS-LRR	VIT_212s0034g01660	VIT_212s0034g01660.1	NB-ARC,PF00931.23,Rx_N,PF18052.2,LRR_4,PF12799.8,LRR_8,PF13855.7	'No_CC'	gi|359486054|ref|XP_003633379.1|PREDICTED: putative disease resistance protein At3g14460-like [Vitis vinifera]
NBS	VIT_212s0034g01700	VIT_212s0034g01700.1	NB-ARC,PF00931.23	'No_CC'	gi|359486059|ref|XP_002271783.2|PREDICTED: putative disease resistance RPP13-like protein 1-like [Vitis vinifera]
NBS-LRR	VIT_212s0034g01750	VIT_212s0034g01750.1	NB-ARC,PF00931.23,Rx_N,PF18052.2,LRR_4,PF12799.8,AAA_16,PF13191.7	'No_CC'	gi|147780319|emb|CAN70245.1|hypothetical protein VITISV_027660 [Vitis vinifera]
NBS-LRR	VIT_212s0034g02040	VIT_212s0034g02040.1	NB-ARC,PF00931.23,Rx_N,PF18052.2,LRR_4,PF12799.8,LRR_8,PF13855.7	'No_CC'	gi|225447971|ref|XP_002269570.1|PREDICTED: putative disease resistance RPP13-like protein 1 [Vitis vinifera]
NBS-LRR	VIT_212s0034g02310	VIT_212s0034g02310.1	NB-ARC,PF00931.23,Rx_N,PF18052.2,LRR_4,PF12799.8,LRR_8,PF13855.7	'No_CC'	gi|359486040|ref|XP_002268644.2|PREDICTED: putative disease resistance protein At3g14460-like [Vitis vinifera]
NBS	VIT_212s0034g02340	VIT_212s0034g02340.1	NB-ARC,PF00931.23,Rx_N,PF18052.2,AAA_16,PF13191.7	'No_CC'	gi|359486038|ref|XP_002265572.2|PREDICTED: putative disease resistance RPP13-like protein 1-like [Vitis vinifera]
NBS	VIT_212s0034g02400	VIT_212s0034g02400.1	NB-ARC,PF00931.23,Rx_N,PF18052.2	'No_CC'	gi|359486034|ref|XP_002267863.2|PREDICTED: putative disease resistance protein At3g14460-like [Vitis vinifera]
NBS-LRR	VIT_212s0034g02440	VIT_212s0034g02440.1	NB-ARC,PF00931.23,Rx_N,PF18052.2,LRR_4,PF12799.8	'No_CC'	gi|359486032|ref|XP_003633376.1|PREDICTED: putative disease resistance protein At3g14460-like [Vitis vinifera]
NBS-LRR	VIT_212s0034g02500	VIT_212s0034g02500.1	NB-ARC,PF00931.23,Rx_N,PF18052.2,LRR_4,PF12799.8,LRR_8,PF13855.7	'No_CC'	gi|359486030|ref|XP_002267470.2|PREDICTED: putative disease resistance protein At3g14460-like [Vitis vinifera]
NBS-LRR	VIT_212s0034g02530	VIT_212s0034g02530.1	NB-ARC,PF00931.23,LRR_4,PF12799.8,LRR_8,PF13855.7	'No_CC'	gi|359486026|ref|XP_002267228.2|PREDICTED: putative disease resistance RPP13-like protein 1-like [Vitis vinifera]
NBS	VIT_212s0035g00410	VIT_212s0035g00410.1	Rx_N,PF18052.2	'No_CC'	gi|297739573|emb|CBI29755.3|unnamed protein product [Vitis vinifera]
NBS	VIT_212s0035g00440	VIT_212s0035g00440.1	NB-ARC,PF00931.23	'No_CC'	gi|297739572|emb|CBI29754.3|unnamed protein product [Vitis vinifera]
CC-NBS-LRR	VIT_212s0035g01260	VIT_212s0035g01260.3	LRR_8,PF13855.7,NB-ARC,PF00931.23	'CC_region'	gi|297739496|emb|CBI29678.3|unnamed protein product [Vitis vinifera]
NBS	VIT_212s0035g01280	VIT_212s0035g01280.1	NB-ARC,PF00931.23	'No_CC'	gi|297739495|emb|CBI29677.3|unnamed protein product [Vitis vinifera]
CC-NBS-LRR	VIT_212s0035g01330	VIT_212s0035g01330.1	NB-ARC,PF00931.23,LRR_8,PF13855.7,LRR_4,PF12799.8	'CC_region'	gi|297739493|emb|CBI29675.3|unnamed protein product [Vitis vinifera]
NBS-LRR	VIT_212s0035g01470	VIT_212s0035g01470.1	LRR_8,PF13855.7,NB-ARC,PF00931.23,LRR_4,PF12799.8	'No_CC'	gi|297739483|emb|CBI29665.3|unnamed protein product [Vitis vinifera]
NBS-LRR	VIT_212s0035g01554	VIT_212s0035g01554.1	NB-ARC,PF00931.23,LRR_4,PF12799.8,LRR_8,PF13855.7,TniB,PF05621.12	'No_CC'	gi|147790050|emb|CAN60524.1|hypothetical protein VITISV_010159 [Vitis vinifera]
NBS-LRR	VIT_212s0035g01590	VIT_212s0035g01590.1	LRR_8,PF13855.7,LRR_4,PF12799.8,NB-ARC,PF00931.23	'No_CC'	gi|147841399|emb|CAN71233.1|hypothetical protein VITISV_019907 [Vitis vinifera]
CC-NBS-LRR	VIT_212s0035g01596	VIT_212s0035g01596.1	NB-ARC,PF00931.23,TniB,PF05621.12,AAA_22,PF13401.7,LRR_4,PF12799.8,LRR_8,PF13855.7	'CC_region'	gi|147790050|emb|CAN60524.1|hypothetical protein VITISV_010159 [Vitis vinifera]
NBS	VIT_212s0035g01605	VIT_212s0035g01605.1	NB-ARC,PF00931.23	'No_CC'	gi|147790050|emb|CAN60524.1|hypothetical protein VITISV_010159 [Vitis vinifera]
CC-NBS-LRR	VIT_212s0035g01630	VIT_212s0035g01630.1	NB-ARC,PF00931.23,LRR_8,PF13855.7,LRR_4,PF12799.8,AAA_22,PF13401.7	'CC_region'	gi|147798654|emb|CAN63327.1|hypothetical protein VITISV_038474 [Vitis vinifera]
NBS	VIT_212s0035g01680	VIT_212s0035g01680.1	NB-ARC,PF00931.23	'No_CC'	gi|297739470|emb|CBI29652.3|unnamed protein product [Vitis vinifera]
NBS	VIT_212s0055g01165	VIT_212s0055g01165.1	NB-ARC,PF00931.23,DAGK_cat,PF00781.25	'No_CC'	gi|359485901|ref|XP_002263487.2|PREDICTED: uncharacterized protein LOC100250179 [Vitis vinifera]
CC-NBS	VIT_212s0057g01130	VIT_212s0057g01130.1	Rx_N,PF18052.2,NB-ARC,PF00931.23	'CC_region'	gi|296085040|emb|CBI28455.3|unnamed protein product [Vitis vinifera]
CC-NBS-LRR	VIT_212s0121g00050	VIT_212s0121g00050.1	NB-ARC,PF00931.23,Rx_N,PF18052.2,LRR_4,PF12799.8,LRR_8,PF13855.7,AAA_16,PF13191.7	'CC_region'	gi|225448305|ref|XP_002265391.1|PREDICTED: putative disease resistance RPP13-like protein 1 [Vitis vinifera]
NBS-LRR	VIT_212s0121g00060	VIT_212s0121g00060.1	NB-ARC,PF00931.23,LRR_8,PF13855.7,LRR_4,PF12799.8	'No_CC'	gi|359485895|ref|XP_002265277.2|PREDICTED: putative disease resistance RPP13-like protein 1-like [Vitis vinifera]
NBS	VIT_212s0121g00085	VIT_212s0121g00085.1	NB-ARC,PF00931.23	'No_CC'	gi|359487951|ref|XP_003633681.1|PREDICTED: LOW QUALITY PROTEIN: probable disease resistance protein At1g61300-like [Vitis vinifera]
NBS	VIT_212s0121g00155	VIT_212s0121g00155.1	NB-ARC,PF00931.23,DAGK_cat,PF00781.25	'No_CC'	gi|359485901|ref|XP_002263487.2|PREDICTED: uncharacterized protein LOC100250179 [Vitis vinifera]
NBS	VIT_212s0121g00240	VIT_212s0121g00240.1	NB-ARC,PF00931.23,DAGK_acc,PF00609.20	'No_CC'	gi|359485901|ref|XP_002263487.2|PREDICTED: uncharacterized protein LOC100250179 [Vitis vinifera]
NBS	VIT_212s0121g00290	VIT_212s0121g00290.1	DAGK_acc,PF00609.20,NB-ARC,PF00931.23	'No_CC'	gi|225448317|ref|XP_002265834.1|PREDICTED: uncharacterized protein LOC100265636 [Vitis vinifera]
NBS	VIT_212s0142g00570	VIT_212s0142g00570.1	NB-ARC,PF00931.23	'No_CC'	gi|359485170|ref|XP_003633226.1|PREDICTED: uncharacterized protein LOC100854936 [Vitis vinifera]
TIR-NBS-LRR	VIT_212s0142g00590	VIT_212s0142g00590.1	TIR,PF01582.21,LRR_4,PF12799.8,LRR_8,PF13855.7,NB-ARC,PF00931.23,TIR_2,PF13676.7	'No_CC'	gi|296086817|emb|CBI32966.3|unnamed protein product [Vitis vinifera]
NBS	VIT_212s0178g00120	VIT_212s0178g00120.1	NB-ARC,PF00931.23	'No_CC'	gi|359485901|ref|XP_002263487.2|PREDICTED: uncharacterized protein LOC100250179 [Vitis vinifera]
NBS	VIT_212s0178g00145	VIT_212s0178g00145.1	NB-ARC,PF00931.23	'No_CC'	gi|225448317|ref|XP_002265834.1|PREDICTED: uncharacterized protein LOC100265636 [Vitis vinifera]
NBS	VIT_212s0178g00190	VIT_212s0178g00190.1	NB-ARC,PF00931.23	'No_CC'	gi|359485901|ref|XP_002263487.2|PREDICTED: uncharacterized protein LOC100250179 [Vitis vinifera]
NBS-LRR	VIT_213s0019g00380	VIT_213s0019g00380.1	NB-ARC,PF00931.23,Rx_N,PF18052.2,LRR_4,PF12799.8,AAA_16,PF13191.7,LRR_8,PF13855.7	'No_CC'	gi|359487182|ref|XP_003633528.1|PREDICTED: putative disease resistance protein At3g14460-like [Vitis vinifera]
NBS	VIT_213s0019g01050	VIT_213s0019g01050.1	NB-ARC,PF00931.23,Rx_N,PF18052.2	'No_CC'	gi|359480367|ref|XP_003632438.1|PREDICTED: putative disease resistance protein At3g14460-like [Vitis vinifera]
NBS-LRR	VIT_213s0019g01120	VIT_213s0019g01120.1	NB-ARC,PF00931.23,Rx_N,PF18052.2,LRR_4,PF12799.8,LRR_8,PF13855.7	'No_CC'	gi|359495052|ref|XP_002267579.2|PREDICTED: putative disease resistance protein At3g14460-like [Vitis vinifera]
NBS-LRR	VIT_213s0019g01140	VIT_213s0019g01140.1	NB-ARC,PF00931.23,Rx_N,PF18052.2,LRR_4,PF12799.8,LRR_8,PF13855.7	'No_CC'	gi|359495054|ref|XP_002267622.2|PREDICTED: putative disease resistance RPP13-like protein 1-like [Vitis vinifera]
NBS-LRR	VIT_213s0019g01880	VIT_213s0019g01880.1	NB-ARC,PF00931.23,Rx_N,PF18052.2,LRR_4,PF12799.8,LRR_8,PF13855.7	'No_CC'	gi|359495083|ref|XP_003634908.1|PREDICTED: putative disease resistance protein At3g14460-like [Vitis vinifera]
NBS-LRR	VIT_213s0019g01950	VIT_213s0019g01950.1	NB-ARC,PF00931.23,Rx_N,PF18052.2,LRR_8,PF13855.7,LRR_4,PF12799.8	'No_CC'	gi|359495085|ref|XP_003634909.1|PREDICTED: putative disease resistance protein At3g14460-like [Vitis vinifera]
NBS	VIT_213s0047g00595	VIT_213s0047g00595.1	Rx_N,PF18052.2,NB-ARC,PF00931.23	'No_CC'	gi|359487075|ref|XP_002271015.2|PREDICTED: putative disease resistance protein At3g14460-like [Vitis vinifera]
NBS-LRR	VIT_213s0047g00730	VIT_213s0047g00730.1	NB-ARC,PF00931.23,LRR_4,PF12799.8,LRR_8,PF13855.7,LRR_5,PF13306.7	'No_CC'	gi|296085385|emb|CBI29117.3|unnamed protein product [Vitis vinifera]
NBS	VIT_213s0047g00782	VIT_213s0047g00782.1	NB-ARC,PF00931.23	'No_CC'	gi|147802352|emb|CAN77124.1|hypothetical protein VITISV_013626 [Vitis vinifera]
NBS-LRR	VIT_213s0047g00950	VIT_213s0047g00950.1	NB-ARC,PF00931.23,Rx_N,PF18052.2,LRR_8,PF13855.7,LRR_4,PF12799.8	'No_CC'	gi|359487069|ref|XP_003633511.1|PREDICTED: putative disease resistance protein At3g14460-like [Vitis vinifera]
NBS-LRR	VIT_213s0047g01010	VIT_213s0047g01010.1	LRR_4,PF12799.8,NB-ARC,PF00931.23,LRR_8,PF13855.7	'No_CC'	gi|359487065|ref|XP_002270668.2|PREDICTED: putative disease resistance protein At3g14460-like [Vitis vinifera]
CC-NBS-LRR	VIT_213s0064g00060	VIT_213s0064g00060.1	NB-ARC,PF00931.23,Rx_N,PF18052.2,LRR_4,PF12799.8,AAA_16,PF13191.7,LRR_8,PF13855.7,AAA_22,PF13401.7	'CC_region'	gi|297736335|emb|CBI24973.3|unnamed protein product [Vitis vinifera]
NBS-LRR	VIT_213s0064g00100	VIT_213s0064g00100.1	LRR_4,PF12799.8,Rx_N,PF18052.2,NB-ARC,PF00931.23,LRR_8,PF13855.7	'No_CC'	gi|297736332|emb|CBI24970.3|unnamed protein product [Vitis vinifera]
CC-NBS-LRR	VIT_213s0064g00140	VIT_213s0064g00140.1	NB-ARC,PF00931.23,Rx_N,PF18052.2,LRR_4,PF12799.8,LRR_8,PF13855.7	'CC_region'	gi|225450005|ref|XP_002272291.1|PREDICTED: putative disease resistance protein At3g14460 [Vitis vinifera]
NBS-LRR	VIT_213s0064g00320	VIT_213s0064g00320.1	NB-ARC,PF00931.23,Rx_N,PF18052.2,LRR_4,PF12799.8,LRR_8,PF13855.7	'No_CC'	gi|225450032|ref|XP_002273051.1|PREDICTED: putative disease resistance protein At3g14460 [Vitis vinifera]
NBS-LRR	VIT_213s0064g00530	VIT_213s0064g00530.1	NB-ARC,PF00931.23,LRR_8,PF13855.7,LRR_4,PF12799.8	'No_CC'	gi|225450067|ref|XP_002274160.1|PREDICTED: putative disease resistance protein RGA4-like [Vitis vinifera]
NBS	VIT_213s0064g00550	VIT_213s0064g00550.1	NB-ARC,PF00931.23	'No_CC'	gi|297736285|emb|CBI24923.3|unnamed protein product [Vitis vinifera]
NBS	VIT_213s0064g01790	VIT_213s0064g01790.1	NB-ARC,PF00931.23,Rx_N,PF18052.2,AAA_16,PF13191.7	'No_CC'	gi|225450365|ref|XP_002269869.1|PREDICTED: putative disease resistance protein At3g14460 [Vitis vinifera]
NBS-LRR	VIT_213s0064g01800	VIT_213s0064g01800.3	NB-ARC,PF00931.23,Rx_N,PF18052.2,LRR_4,PF12799.8	'No_CC'	gi|225450365|ref|XP_002269869.1|PREDICTED: putative disease resistance protein At3g14460 [Vitis vinifera]
CC-NBS	VIT_213s0064g01830	VIT_213s0064g01830.1	Rx_N,PF18052.2,NB-ARC,PF00931.23	'CC_region'	gi|147862116|emb|CAN82956.1|hypothetical protein VITISV_014776 [Vitis vinifera]
CC-NBS-LRR	VIT_213s0064g01850	VIT_213s0064g01850.1	NB-ARC,PF00931.23,Rx_N,PF18052.2,LRR_8,PF13855.7,LRR_4,PF12799.8	'CC_region'	gi|147862117|emb|CAN82957.1|hypothetical protein VITISV_014777 [Vitis vinifera]
NBS-LRR	VIT_213s0064g01870	VIT_213s0064g01870.2	NB-ARC,PF00931.23,Rx_N,PF18052.2,LRR_4,PF12799.8,LRR_8,PF13855.7	'No_CC'	gi|359487324|ref|XP_002269572.2|PREDICTED: putative disease resistance protein At3g14460-like [Vitis vinifera]
NBS	VIT_213s0067g00650	VIT_213s0067g00650.1	NB-ARC,PF00931.23	'No_CC'	gi|298205086|emb|CBI40607.3|unnamed protein product [Vitis vinifera]
NBS	VIT_213s0067g00740	VIT_213s0067g00740.1	NB-ARC,PF00931.23	'No_CC'	gi|359486507|ref|XP_002271551.2|PREDICTED: probable disease resistance RPP8-like protein 2-like [Vitis vinifera]
NBS	VIT_213s0067g00750	VIT_213s0067g00750.1	NB-ARC,PF00931.23,Rx_N,PF18052.2	'No_CC'	gi|297736616|emb|CBI25487.3|unnamed protein product [Vitis vinifera]
NBS	VIT_213s0067g00760	VIT_213s0067g00760.2	NB-ARC,PF00931.23	'No_CC'	gi|359486507|ref|XP_002271551.2|PREDICTED: probable disease resistance RPP8-like protein 2-like [Vitis vinifera]
CC-NBS	VIT_213s0067g00780	VIT_213s0067g00780.1	NB-ARC,PF00931.23,Rx_N,PF18052.2	'CC_region'	gi|297736615|emb|CBI25486.3|unnamed protein product [Vitis vinifera]
NBS	VIT_213s0067g00790	VIT_213s0067g00790.1	NB-ARC,PF00931.23,Rx_N,PF18052.2	'No_CC'	gi|359486503|ref|XP_003633451.1|PREDICTED: probable disease resistance protein RDL6/RF9-like [Vitis vinifera]
NBS	VIT_213s0067g00810	VIT_213s0067g00810.3	NB-ARC,PF00931.23,Rx_N,PF18052.2	'No_CC'	gi|225448417|ref|XP_002271819.1|PREDICTED: disease resistance RPP8-like protein 3-like [Vitis vinifera]
NBS	VIT_213s0067g00830	VIT_213s0067g00830.1	SEO_C,PF14577.7,NB-ARC,PF00931.23,Rx_N,PF18052.2	'No_CC'	gi|359486501|ref|XP_002271883.2|PREDICTED: probable disease resistance RPP8-like protein 2-like [Vitis vinifera]
NBS-LRR	VIT_213s0067g00910	VIT_213s0067g00910.1	NB-ARC,PF00931.23,Rx_N,PF18052.2,LRR_4,PF12799.8,LRR_8,PF13855.7,AAA_22,PF13401.7	'No_CC'	gi|359494971|ref|XP_002269772.2|PREDICTED: putative disease resistance protein At3g14460-like [Vitis vinifera]
NBS-LRR	VIT_213s0067g01100	VIT_213s0067g01100.1	NB-ARC,PF00931.23,Rx_N,PF18052.2,LRR_4,PF12799.8,LRR_8,PF13855.7	'No_CC'	gi|359494975|ref|XP_002263436.2|PREDICTED: putative disease resistance protein At3g14460-like [Vitis vinifera]
NBS	VIT_213s0067g01310	VIT_213s0067g01310.1	NB-ARC,PF00931.23,Rx_N,PF18052.2	'No_CC'	gi|359494981|ref|XP_002269138.2|PREDICTED: putative disease resistance protein At3g14460-like [Vitis vinifera]
NBS	VIT_213s0067g01490	VIT_213s0067g01490.1	NB-ARC,PF00931.23,Rx_N,PF18052.2	'No_CC'	gi|359494971|ref|XP_002269772.2|PREDICTED: putative disease resistance protein At3g14460-like [Vitis vinifera]
NBS-LRR	VIT_213s0067g02430	VIT_213s0067g02430.1	NB-ARC,PF00931.23,Rx_N,PF18052.2,LRR_4,PF12799.8,LRR_8,PF13855.7	'No_CC'	gi|359494981|ref|XP_002269138.2|PREDICTED: putative disease resistance protein At3g14460-like [Vitis vinifera]
NBS-LRR	VIT_213s0067g02580	VIT_213s0067g02580.1	NB-ARC,PF00931.23,Rx_N,PF18052.2,LRR_4,PF12799.8,LRR_8,PF13855.7	'No_CC'	gi|359494994|ref|XP_003634895.1|PREDICTED: putative disease resistance RPP13-like protein 1-like [Vitis vinifera]
NBS-LRR	VIT_213s0067g03570	VIT_213s0067g03570.1	NB-ARC,PF00931.23,LRR_4,PF12799.8,LRR_8,PF13855.7	'No_CC'	gi|359495012|ref|XP_002266514.2|PREDICTED: putative disease resistance protein At3g14460-like [Vitis vinifera]
NBS-LRR	VIT_213s0067g03590	VIT_213s0067g03590.1	NB-ARC,PF00931.23,Rx_N,PF18052.2,LRR_4,PF12799.8,LRR_8,PF13855.7	'No_CC'	gi|359495014|ref|XP_002266554.2|PREDICTED: putative disease resistance protein At3g14460-like [Vitis vinifera]
NBS-LRR	VIT_213s0067g03640	VIT_213s0067g03640.1	NB-ARC,PF00931.23,Rx_N,PF18052.2,LRR_4,PF12799.8,LRR_8,PF13855.7,AAA_22,PF13401.7	'No_CC'	gi|359495016|ref|XP_002266590.2|PREDICTED: putative disease resistance protein At3g14460-like [Vitis vinifera]
NBS-LRR	VIT_213s0074g00130	VIT_213s0074g00130.1	NB-ARC,PF00931.23,LRR_4,PF12799.8,LRR_8,PF13855.7	'No_CC'	gi|225449649|ref|XP_002262753.1|PREDICTED: putative disease resistance protein At3g14460 [Vitis vinifera]
CC-NBS-LRR	VIT_213s0084g00060	VIT_213s0084g00060.1	NB-ARC,PF00931.23,Rx_N,PF18052.2,LRR_4,PF12799.8,LRR_8,PF13855.7	'CC_region'	gi|225464045|ref|XP_002265970.1|PREDICTED: putative disease resistance protein RGA3 [Vitis vinifera]
NBS-LRR	VIT_213s0084g00360	VIT_213s0084g00360.1	NB-ARC,PF00931.23,Rx_N,PF18052.2,LRR_4,PF12799.8,LRR_8,PF13855.7	'No_CC'	gi|225464007|ref|XP_002264663.1|PREDICTED: putative disease resistance protein At3g14460 [Vitis vinifera]
NBS-LRR	VIT_213s0084g00420	VIT_213s0084g00420.1	NB-ARC,PF00931.23,Rx_N,PF18052.2,LRR_4,PF12799.8,LRR_8,PF13855.7	'No_CC'	gi|359487155|ref|XP_002264397.2|PREDICTED: putative disease resistance protein At3g14460-like [Vitis vinifera]
NBS-LRR	VIT_213s0084g00510	VIT_213s0084g00510.1	NB-ARC,PF00931.23,LRR_4,PF12799.8	'No_CC'	gi|359487158|ref|XP_003633523.1|PREDICTED: putative disease resistance protein RGA4-like, partial [Vitis vinifera]
NBS-LRR	VIT_213s0084g00750	VIT_213s0084g00750.1	NB-ARC,PF00931.23,Rx_N,PF18052.2,LRR_4,PF12799.8	'No_CC'	gi|296087855|emb|CBI35111.3|unnamed protein product [Vitis vinifera]
CC-NBS-LRR	VIT_213s0101g00300	VIT_213s0101g00300.1	NB-ARC,PF00931.23,Rx_N,PF18052.2,LRR_4,PF12799.8,LRR_8,PF13855.7	'CC_region'	gi|359486996|ref|XP_003633504.1|PREDICTED: putative disease resistance protein At3g14460-like [Vitis vinifera]
NBS-LRR	VIT_213s0106g00020	VIT_213s0106g00020.1	NB-ARC,PF00931.23,Rx_N,PF18052.2,LRR_4,PF12799.8,LRR_8,PF13855.7	'No_CC'	gi|225450337|ref|XP_002268648.1|PREDICTED: putative disease resistance protein At3g14460-like [Vitis vinifera]
NBS-LRR	VIT_213s0139g00010	VIT_213s0139g00010.1	NB-ARC,PF00931.23,LRR_4,PF12799.8,LRR_8,PF13855.7	'No_CC'	gi|359497792|ref|XP_003635643.1|PREDICTED: putative disease resistance RPP13-like protein 1-like, partial [Vitis vinifera]
CC-NBS-LRR	VIT_213s0139g00030	VIT_213s0139g00030.1	NB-ARC,PF00931.23,Rx_N,PF18052.2,LRR_8,PF13855.7,LRR_4,PF12799.8	'CC_region'	gi|359487225|ref|XP_002268551.2|PREDICTED: putative disease resistance RPP13-like protein 1-like [Vitis vinifera]
CC-NBS-LRR	VIT_213s0139g00070	VIT_213s0139g00070.1	NB-ARC,PF00931.23,Rx_N,PF18052.2,LRR_4,PF12799.8	'CC_region'	gi|359487176|ref|XP_003633526.1|PREDICTED: putative disease resistance RPP13-like protein 1-like [Vitis vinifera]
NBS-LRR	VIT_213s0139g00130	VIT_213s0139g00130.1	NB-ARC,PF00931.23,Rx_N,PF18052.2,LRR_4,PF12799.8,AAA_16,PF13191.7,LRR_8,PF13855.7	'No_CC'	gi|147862409|emb|CAN81911.1|hypothetical protein VITISV_042289 [Vitis vinifera]
NBS-LRR	VIT_213s0139g00210	VIT_213s0139g00210.1	NB-ARC,PF00931.23,LRR_4,PF12799.8,LRR_8,PF13855.7	'No_CC'	gi|359487188|ref|XP_003633529.1|PREDICTED: putative disease resistance RPP13-like protein 1-like, partial [Vitis vinifera]
NBS-LRR	VIT_213s0139g00220	VIT_213s0139g00220.1	NB-ARC,PF00931.23,Rx_N,PF18052.2,LRR_4,PF12799.8,LRR_8,PF13855.7,AAA_16,PF13191.7	'No_CC'	gi|359487190|ref|XP_003633530.1|PREDICTED: putative disease resistance protein At3g14460-like [Vitis vinifera]
CC-NBS	VIT_213s0139g00245	VIT_213s0139g00245.1	NB-ARC,PF00931.23	'CC_region'	gi|359487188|ref|XP_003633529.1|PREDICTED: putative disease resistance RPP13-like protein 1-like, partial [Vitis vinifera]
NBS-LRR	VIT_213s0139g00270	VIT_213s0139g00270.1	NB-ARC,PF00931.23,LRR_4,PF12799.8,LRR_8,PF13855.7	'No_CC'	gi|147795940|emb|CAN67431.1|hypothetical protein VITISV_015133 [Vitis vinifera]
NBS-LRR	VIT_213s0139g00290	VIT_213s0139g00290.1	NB-ARC,PF00931.23,LRR_8,PF13855.7,LRR_4,PF12799.8	'No_CC'	gi|225465962|ref|XP_002269685.1|PREDICTED: putative disease resistance RPP13-like protein 1-like [Vitis vinifera]
NBS-LRR	VIT_213s0139g00320	VIT_213s0139g00320.1	NB-ARC,PF00931.23,Rx_N,PF18052.2,LRR_4,PF12799.8,LRR_8,PF13855.7	'No_CC'	gi|359487194|ref|XP_002269779.2|PREDICTED: putative disease resistance protein RGA3-like [Vitis vinifera]
NBS-LRR	VIT_213s0139g00340	VIT_213s0139g00340.1	NB-ARC,PF00931.23,Rx_N,PF18052.2,LRR_4,PF12799.8,LRR_8,PF13855.7	'No_CC'	gi|359487194|ref|XP_002269779.2|PREDICTED: putative disease resistance protein RGA3-like [Vitis vinifera]
CC-NBS-LRR	VIT_213s0156g00440	VIT_213s0156g00440.1	NB-ARC,PF00931.23,Rx_N,PF18052.2,LRR_4,PF12799.8,LRR_8,PF13855.7	'CC_region'	gi|359487469|ref|XP_002268522.2|PREDICTED: putative disease resistance protein At3g14460-like [Vitis vinifera]
CC-NBS	VIT_213s0156g00480	VIT_213s0156g00480.1	Rx_N,PF18052.2,NB-ARC,PF00931.23	'CC_region'	gi|225450337|ref|XP_002268648.1|PREDICTED: putative disease resistance protein At3g14460-like [Vitis vinifera]
NBS	VIT_213s0156g00500	VIT_213s0156g00500.1	NB-ARC,PF00931.23,Rx_N,PF18052.2	'No_CC'	gi|359487473|ref|XP_002268687.2|PREDICTED: putative disease resistance protein At3g14460-like [Vitis vinifera]
NBS-LRR	VIT_213s0156g00540	VIT_213s0156g00540.3	NB-ARC,PF00931.23,LRR_4,PF12799.8,LRR_8,PF13855.7	'No_CC'	gi|359487475|ref|XP_003633599.1|PREDICTED: putative disease resistance protein At3g14460-like [Vitis vinifera]
NBS	VIT_213s0156g00560	VIT_213s0156g00560.1	Rx_N,PF18052.2,NB-ARC,PF00931.23	'No_CC'	gi|297741240|emb|CBI32191.3|unnamed protein product [Vitis vinifera]
NBS-LRR	VIT_213s0158g00010	VIT_213s0158g00010.1	NB-ARC,PF00931.23,LRR_4,PF12799.8	'No_CC'	gi|225449985|ref|XP_002271553.1|PREDICTED: putative disease resistance RPP13-like protein 1-like [Vitis vinifera]
CC-NBS-LRR	VIT_213s0158g00170	VIT_213s0158g00170.1	NB-ARC,PF00931.23,Rx_N,PF18052.2,LRR_8,PF13855.7,LRR_4,PF12799.8	'CC_region'	gi|225449965|ref|XP_002271203.1|PREDICTED: putative disease resistance protein RGA4-like [Vitis vinifera]
CC-NBS	VIT_213s0158g00190	VIT_213s0158g00190.1	NB-ARC,PF00931.23,Rx_N,PF18052.2,AAA_16,PF13191.7	'CC_region'	gi|225449961|ref|XP_002271133.1|PREDICTED: putative disease resistance protein At3g14460-like [Vitis vinifera]
NBS-LRR	VIT_213s0158g00210	VIT_213s0158g00210.1	NB-ARC,PF00931.23,Rx_N,PF18052.2,LRR_4,PF12799.8,LRR_8,PF13855.7	'No_CC'	gi|359487247|ref|XP_003633546.1|PREDICTED: putative disease resistance protein At3g14460-like [Vitis vinifera]
NBS-LRR	VIT_213s0158g00260	VIT_213s0158g00260.1	NB-ARC,PF00931.23,Rx_N,PF18052.2,LRR_4,PF12799.8,LRR_8,PF13855.7	'No_CC'	gi|225449959|ref|XP_002271030.1|PREDICTED: putative disease resistance protein At3g14460-like [Vitis vinifera]
NBS-LRR	VIT_213s0158g00290	VIT_213s0158g00290.1	NB-ARC,PF00931.23,Rx_N,PF18052.2,LRR_4,PF12799.8,LRR_8,PF13855.7	'No_CC'	gi|225449957|ref|XP_002270955.1|PREDICTED: putative disease resistance protein At3g14460 [Vitis vinifera]
NBS	VIT_213s0158g00400	VIT_213s0158g00400.1	NB-ARC,PF00931.23,Rx_N,PF18052.2	'No_CC'	gi|359487253|ref|XP_003633548.1|PREDICTED: putative disease resistance protein At3g14460-like [Vitis vinifera]
NBS-LRR	VIT_213s0158g00430	VIT_213s0158g00430.1	NB-ARC,PF00931.23,Rx_N,PF18052.2,LRR_4,PF12799.8	'No_CC'	gi|359496869|ref|XP_002269619.2|PREDICTED: putative disease resistance protein At3g14460-like [Vitis vinifera]
NBS-LRR	VIT_214s0030g00130	VIT_214s0030g00130.1	NB-ARC,PF00931.23,LRR_8,PF13855.7,LRR_4,PF12799.8,NACHT,PF05729.13	'No_CC'	gi|298205038|emb|CBI34345.3|unnamed protein product [Vitis vinifera]
CC-NBS	VIT_214s0030g00150	VIT_214s0030g00150.1	NB-ARC,PF00931.23,NACHT,PF05729.13	'CC_region'	gi|359487988|ref|XP_002262896.2|PREDICTED: disease resistance protein RPS2-like [Vitis vinifera]
NBS	VIT_214s0030g00492	VIT_214s0030g00492.1	NB-ARC,PF00931.23	'No_CC'	gi|359487924|ref|XP_003633676.1|PREDICTED: uncharacterized protein LOC100246921 [Vitis vinifera]
NBS	VIT_214s0030g00525	VIT_214s0030g00525.1	NB-ARC,PF00931.23	'No_CC'	gi|359487951|ref|XP_003633681.1|PREDICTED: LOW QUALITY PROTEIN: probable disease resistance protein At1g61300-like [Vitis vinifera]
NBS	VIT_214s0030g00546	VIT_214s0030g00546.1	NB-ARC,PF00931.23	'No_CC'	gi|147790132|emb|CAN70120.1|hypothetical protein VITISV_026304 [Vitis vinifera]
NBS	VIT_214s0030g00565	VIT_214s0030g00565.1	NB-ARC,PF00931.23	'No_CC'	gi|359487951|ref|XP_003633681.1|PREDICTED: LOW QUALITY PROTEIN: probable disease resistance protein At1g61300-like [Vitis vinifera]
NBS	VIT_214s0030g00595	VIT_214s0030g00595.1	NB-ARC,PF00931.23	'No_CC'	gi|359487951|ref|XP_003633681.1|PREDICTED: LOW QUALITY PROTEIN: probable disease resistance protein At1g61300-like [Vitis vinifera]
NBS-LRR	VIT_214s0030g00840	VIT_214s0030g00840.1	NB-ARC,PF00931.23,LRR_8,PF13855.7,AAA_16,PF13191.7,LRR_4,PF12799.8	'No_CC'	gi|298204973|emb|CBI34280.3|unnamed protein product [Vitis vinifera]
CC-NBS-LRR	VIT_214s0030g00870	VIT_214s0030g00870.1	NB-ARC,PF00931.23,LRR_8,PF13855.7,NACHT,PF05729.13,AAA_16,PF13191.7	'CC_region'	gi|298204970|emb|CBI34277.3|unnamed protein product [Vitis vinifera]
NBS-LRR	VIT_214s0030g00960	VIT_214s0030g00960.2	NB-ARC,PF00931.23,LRR_8,PF13855.7,LRR_4,PF12799.8	'No_CC'	gi|298204964|emb|CBI34271.3|unnamed protein product [Vitis vinifera]
NBS-LRR	VIT_214s0030g00990	VIT_214s0030g00990.1	NB-ARC,PF00931.23,LRR_8,PF13855.7,LRR_4,PF12799.8	'No_CC'	gi|298204960|emb|CBI34267.3|unnamed protein product [Vitis vinifera]
CC-NBS-LRR	VIT_214s0030g01050	VIT_214s0030g01050.1	NB-ARC,PF00931.23,LRR_8,PF13855.7,AAA_16,PF13191.7,AAA_22,PF13401.7,LRR_4,PF12799.8,ATPase_2,PF01637.19,AAA_14,PF13173.7,NACHT,PF05729.13,AAA_18,PF13238.7	'CC_region'	gi|359487936|ref|XP_002264280.2|PREDICTED: uncharacterized protein LOC100243958 [Vitis vinifera]
NBS-LRR	VIT_214s0030g01160	VIT_214s0030g01160.1	NB-ARC,PF00931.23,LRR_8,PF13855.7,LRR_4,PF12799.8,AAA_16,PF13191.7	'No_CC'	gi|359487926|ref|XP_002270338.2|PREDICTED: uncharacterized protein LOC100248775 [Vitis vinifera]
CC-NBS-LRR	VIT_214s0030g01170	VIT_214s0030g01170.1	NB-ARC,PF00931.23,LRR_8,PF13855.7	'CC_region'	gi|359487926|ref|XP_002270338.2|PREDICTED: uncharacterized protein LOC100248775 [Vitis vinifera]
NBS-LRR	VIT_214s0030g01200	VIT_214s0030g01200.1	NB-ARC,PF00931.23,LRR_8,PF13855.7,LRR_4,PF12799.8,AAA_16,PF13191.7	'No_CC'	gi|298204946|emb|CBI34253.3|unnamed protein product [Vitis vinifera]
NBS-LRR	VIT_214s0030g01210	VIT_214s0030g01210.1	NB-ARC,PF00931.23,AAA_22,PF13401.7,ATPase_2,PF01637.19,AAA_16,PF13191.7,LRR_8,PF13855.7,LRR_4,PF12799.8	'No_CC'	gi|359487924|ref|XP_003633676.1|PREDICTED: uncharacterized protein LOC100246921 [Vitis vinifera]
CC-NBS	VIT_214s0036g00010	VIT_214s0036g00010.1	NB-ARC,PF00931.23	'CC_region'	gi|359488025|ref|XP_003633688.1|PREDICTED: uncharacterized protein LOC100852821 [Vitis vinifera]
NBS	VIT_214s0036g00030	VIT_214s0036g00030.1	NB-ARC,PF00931.23	'No_CC'	gi|296087872|emb|CBI35155.3|unnamed protein product [Vitis vinifera]
NBS-LRR	VIT_214s0036g00070	VIT_214s0036g00070.1	NB-ARC,PF00931.23,LRR_8,PF13855.7,LRR_4,PF12799.8	'No_CC'	gi|359488101|ref|XP_002263761.2|PREDICTED: disease resistance protein At4g27190-like [Vitis vinifera]
CC-NBS-LRR	VIT_214s0036g00100	VIT_214s0036g00100.2	NB-ARC,PF00931.23,LRR_4,PF12799.8,LRR_8,PF13855.7	'CC_region'	gi|359488103|ref|XP_002263579.2|PREDICTED: disease resistance protein At4g27190-like [Vitis vinifera]
CC-NBS-LRR	VIT_214s0036g00120	VIT_214s0036g00120.1	NB-ARC,PF00931.23,LRR_8,PF13855.7,LRR_4,PF12799.8	'CC_region'	gi|359488101|ref|XP_002263761.2|PREDICTED: disease resistance protein At4g27190-like [Vitis vinifera]
NBS	VIT_214s0036g00240	VIT_214s0036g00240.1	NB-ARC,PF00931.23,AAA_22,PF13401.7	'No_CC'	gi|302143651|emb|CBI22404.3|unnamed protein product [Vitis vinifera]
CC-NBS	VIT_214s0036g00260	VIT_214s0036g00260.1	NB-ARC,PF00931.23,AAA_22,PF13401.7,NACHT,PF05729.13,TniB,PF05621.12	'CC_region'	gi|359488027|ref|XP_002269288.2|PREDICTED: disease resistance protein At4g27190-like [Vitis vinifera]
NBS	VIT_214s0036g00290	VIT_214s0036g00290.1	NB-ARC,PF00931.23	'No_CC'	gi|359488027|ref|XP_002269288.2|PREDICTED: disease resistance protein At4g27190-like [Vitis vinifera]
CC-NBS-LRR	VIT_214s0036g00310	VIT_214s0036g00310.1	NB-ARC,PF00931.23,LRR_8,PF13855.7	'CC_region'	gi|302143649|emb|CBI22402.3|unnamed protein product [Vitis vinifera]
CC-NBS	VIT_214s0036g00330	VIT_214s0036g00330.2	NB-ARC,PF00931.23	'CC_region'	gi|147865073|emb|CAN83232.1|hypothetical protein VITISV_021876 [Vitis vinifera]
CC-NBS-LRR	VIT_214s0036g01110	VIT_214s0036g01110.1	NB-ARC,PF00931.23,LRR_4,PF12799.8,LRR_8,PF13855.7,NACHT,PF05729.13	'CC_region'	gi|302143590|emb|CBI22343.3|unnamed protein product [Vitis vinifera]
NBS-LRR	VIT_214s0036g01180	VIT_214s0036g01180.1	LRR_8,PF13855.7,LRR_4,PF12799.8	'No_CC'	gi|359487926|ref|XP_002270338.2|PREDICTED: uncharacterized protein LOC100248775 [Vitis vinifera]
CC-NBS-LRR	VIT_214s0036g01230	VIT_214s0036g01230.1	NB-ARC,PF00931.23,LRR_8,PF13855.7,LRR_4,PF12799.8,AAA_16,PF13191.7,ATPase_2,PF01637.19,NACHT,PF05729.13,AAA_14,PF13173.7,AAA_22,PF13401.7	'CC_region'	gi|147775150|emb|CAN68116.1|hypothetical protein VITISV_012513 [Vitis vinifera]
NBS-LRR	VIT_214s0036g01305	VIT_214s0036g01305.1	NB-ARC,PF00931.23,LRR_8,PF13855.7,LRR_4,PF12799.8	'No_CC'	gi|359488073|ref|XP_002264203.2|PREDICTED: disease resistance protein At4g27190-like [Vitis vinifera]
NBS-LRR	VIT_214s0036g01310	VIT_214s0036g01310.2	NB-ARC,PF00931.23,LRR_4,PF12799.8,LRR_8,PF13855.7	'No_CC'	gi|359488077|ref|XP_002264667.2|PREDICTED: uncharacterized protein LOC100240893 [Vitis vinifera]
CC-NBS-LRR	VIT_214s0036g01350	VIT_214s0036g01350.1	NB-ARC,PF00931.23,LRR_8,PF13855.7,LRR_4,PF12799.8	'CC_region'	gi|359488073|ref|XP_002264203.2|PREDICTED: disease resistance protein At4g27190-like [Vitis vinifera]
NBS-LRR	VIT_214s0036g01360	VIT_214s0036g01360.4	NB-ARC,PF00931.23,LRR_8,PF13855.7,LRR_4,PF12799.8,ATPase_2,PF01637.19,NACHT,PF05729.13	'No_CC'	gi|359488077|ref|XP_002264667.2|PREDICTED: uncharacterized protein LOC100240893 [Vitis vinifera]
NBS-LRR	VIT_214s0081g00780	VIT_214s0081g00780.1	NB-ARC,PF00931.23,LRR_8,PF13855.7,LRR_4,PF12799.8	'No_CC'	gi|296087872|emb|CBI35155.3|unnamed protein product [Vitis vinifera]
CC-NBS-LRR	VIT_214s0081g00800	VIT_214s0081g00800.1	NB-ARC,PF00931.23,LRR_8,PF13855.7	'CC_region'	gi|359488025|ref|XP_003633688.1|PREDICTED: uncharacterized protein LOC100852821 [Vitis vinifera]
NBS-LRR	VIT_215s0021g00125	VIT_215s0021g00125.1	NB-ARC,PF00931.23,LRR_4,PF12799.8	'No_CC'	gi|359489790|ref|XP_003633978.1|PREDICTED: probable disease resistance protein At1g58602-like [Vitis vinifera]
NBS	VIT_215s0021g00130	VIT_215s0021g00130.1	NB-ARC,PF00931.23,Rx_N,PF18052.2	'No_CC'	gi|359489790|ref|XP_003633978.1|PREDICTED: probable disease resistance protein At1g58602-like [Vitis vinifera]
NBS-LRR	VIT_215s0024g00400	VIT_215s0024g00400.2	NB-ARC,PF00931.23,Rx_N,PF18052.2,LRR_4,PF12799.8,LRR_8,PF13855.7	'No_CC'	gi|225436241|ref|XP_002275171.1|PREDICTED: putative disease resistance protein RGA4 [Vitis vinifera]
NBS-LRR	VIT_215s0024g00440	VIT_215s0024g00440.1	NB-ARC,PF00931.23,Rx_N,PF18052.2,LRR_8,PF13855.7,LRR_4,PF12799.8	'No_CC'	gi|147837976|emb|CAN67140.1|hypothetical protein VITISV_017652 [Vitis vinifera]
NBS-LRR	VIT_215s0024g00450	VIT_215s0024g00450.1	NB-ARC,PF00931.23,LRR_4,PF12799.8,LRR_8,PF13855.7	'No_CC'	gi|359489035|ref|XP_002275064.2|PREDICTED: putative disease resistance protein RGA3-like [Vitis vinifera]
NBS	VIT_215s0024g00470	VIT_215s0024g00470.1	NB-ARC,PF00931.23	'No_CC'	gi|359489033|ref|XP_002275002.2|PREDICTED: putative disease resistance protein RGA3-like [Vitis vinifera]
NBS	VIT_215s0024g01760	VIT_215s0024g01760.1	NB-ARC,PF00931.23	'No_CC'	gi|359489070|ref|XP_003633868.1|PREDICTED: TMV resistance protein N-like [Vitis vinifera]
CC-NBS	VIT_215s0045g00640	VIT_215s0045g00640.1	Rx_N,PF18052.2,NB-ARC,PF00931.23	'CC_region'	gi|297744807|emb|CBI38075.3|unnamed protein product [Vitis vinifera]
NBS	VIT_215s0045g00680	VIT_215s0045g00680.1	NB-ARC,PF00931.23,Rx_N,PF18052.2	'No_CC'	gi|359489148|ref|XP_003633887.1|PREDICTED: probable disease resistance RPP8-like protein 4-like [Vitis vinifera]
NBS-LRR	VIT_215s0045g00710	VIT_215s0045g00710.1	NB-ARC,PF00931.23,NACHT,PF05729.13,LRR_8,PF13855.7	'No_CC'	gi|359489150|ref|XP_003633888.1|PREDICTED: uncharacterized protein LOC100855173 [Vitis vinifera]
CC-NBS	VIT_215s0045g00810	VIT_215s0045g00810.1	Rx_N,PF18052.2,NB-ARC,PF00931.23	'CC_region'	gi|297744815|emb|CBI38083.3|unnamed protein product [Vitis vinifera]
NBS-LRR	VIT_215s0045g00880	VIT_215s0045g00880.1	NB-ARC,PF00931.23,Rx_N,PF18052.2,LRR_8,PF13855.7	'No_CC'	gi|297744816|emb|CBI38084.3|unnamed protein product [Vitis vinifera]
NBS	VIT_215s0045g00920	VIT_215s0045g00920.1	NB-ARC,PF00931.23,Rx_N,PF18052.2	'No_CC'	gi|297744817|emb|CBI38085.3|unnamed protein product [Vitis vinifera]
NBS	VIT_215s0045g00980	VIT_215s0045g00980.1	NB-ARC,PF00931.23,Rx_N,PF18052.2	'No_CC'	gi|297744819|emb|CBI38087.3|unnamed protein product [Vitis vinifera]
NBS-LRR	VIT_215s0045g01020	VIT_215s0045g01020.1	NB-ARC,PF00931.23,LRR_8,PF13855.7,LRR_4,PF12799.8	'No_CC'	gi|359489156|ref|XP_003633889.1|PREDICTED: probable disease resistance protein RDL6/RF9-like [Vitis vinifera]
NBS-LRR	VIT_215s0046g02730	VIT_215s0046g02730.1	NB-ARC,PF00931.23,Rx_N,PF18052.2,LRR_4,PF12799.8	'No_CC'	gi|297745279|emb|CBI40359.3|unnamed protein product [Vitis vinifera]
NBS	VIT_215s0046g02750	VIT_215s0046g02750.1	NB-ARC,PF00931.23,Rx_N,PF18052.2	'No_CC'	gi|225454212|ref|XP_002274233.1|PREDICTED: putative disease resistance protein At1g50180-like [Vitis vinifera]
NBS	VIT_215s0046g02760	VIT_215s0046g02760.1	NB-ARC,PF00931.23,Rx_N,PF18052.2	'No_CC'	gi|359489790|ref|XP_003633978.1|PREDICTED: probable disease resistance protein At1g58602-like [Vitis vinifera]
NBS	VIT_215s0046g02800	VIT_215s0046g02800.1	NB-ARC,PF00931.23,Rx_N,PF18052.2	'No_CC'	gi|297745279|emb|CBI40359.3|unnamed protein product [Vitis vinifera]
NBS	VIT_215s0046g02810	VIT_215s0046g02810.1	NB-ARC,PF00931.23,Rx_N,PF18052.2	'No_CC'	gi|359489792|ref|XP_002274076.2|PREDICTED: probable disease resistance protein RDL6/RF9-like [Vitis vinifera]
NBS	VIT_215s0046g02820	VIT_215s0046g02820.1	NB-ARC,PF00931.23,Rx_N,PF18052.2	'No_CC'	gi|359489790|ref|XP_003633978.1|PREDICTED: probable disease resistance protein At1g58602-like [Vitis vinifera]
NBS	VIT_215s0046g02825	VIT_215s0046g02825.1	NB-ARC,PF00931.23,Rx_N,PF18052.2	'No_CC'	gi|225454204|ref|XP_002273976.1|PREDICTED: disease resistance protein RPP13 [Vitis vinifera]
CC-NBS-LRR	VIT_215s0046g03660	VIT_215s0046g03660.1	NB-ARC,PF00931.23,Rx_N,PF18052.2,LRR_8,PF13855.7,LRR_4,PF12799.8	'CC_region'	gi|147800242|emb|CAN77656.1|hypothetical protein VITISV_002459 [Vitis vinifera]
NBS	VIT_215s0046g03710	VIT_215s0046g03710.1	NB-ARC,PF00931.23	'No_CC'	gi|297745207|emb|CBI40287.3|unnamed protein product [Vitis vinifera]
NBS-LRR	VIT_215s0107g00290	VIT_215s0107g00290.1	NB-ARC,PF00931.23,LRR_4,PF12799.8,LRR_8,PF13855.7	'No_CC'	gi|359489175|ref|XP_002264704.2|PREDICTED: TMV resistance protein N-like [Vitis vinifera]
CC-NBS-LRR	VIT_216s0013g00720	VIT_216s0013g00720.1	NB-ARC,PF00931.23,LRR_8,PF13855.7	'CC_region'	gi|297743317|emb|CBI36184.3|unnamed protein product [Vitis vinifera]
NBS	VIT_216s0022g01330	VIT_216s0022g01330.1	NB-ARC,PF00931.23,Rx_N,PF18052.2	'No_CC'	gi|225455685|ref|XP_002265241.1|PREDICTED: probable disease resistance protein RXW24L [Vitis vinifera]
NBS-LRR	VIT_217s0000g02770	VIT_217s0000g02770.1	NB-ARC,PF00931.23,Rx_N,PF18052.2,LRR_8,PF13855.7	'No_CC'	gi|225456092|ref|XP_002278041.1|PREDICTED: putative disease resistance protein RGA4 [Vitis vinifera]
NBS-LRR	VIT_217s0000g02830	VIT_217s0000g02830.1	NB-ARC,PF00931.23,Rx_N,PF18052.2,LRR_8,PF13855.7,LRR_4,PF12799.8	'No_CC'	gi|297734285|emb|CBI15532.3|unnamed protein product [Vitis vinifera]
NBS	VIT_217s0000g03070	VIT_217s0000g03070.1	Rx_N,PF18052.2,NB-ARC,PF00931.23	'No_CC'	gi|297734264|emb|CBI15511.3|unnamed protein product [Vitis vinifera]
CC-NBS-LRR	VIT_217s0000g03080	VIT_217s0000g03080.1	NB-ARC,PF00931.23,Rx_N,PF18052.2,LRR_8,PF13855.7,LRR_4,PF12799.8	'CC_region'	gi|225456043|ref|XP_002277498.1|PREDICTED: putative disease resistance protein RGA3 [Vitis vinifera]
CC-NBS-LRR	VIT_217s0000g03090	VIT_217s0000g03090.1	Rx_N,PF18052.2,NB-ARC,PF00931.23,LRR_8,PF13855.7	'CC_region'	gi|297734262|emb|CBI15509.3|unnamed protein product [Vitis vinifera]
TIR-NBS-LRR	VIT_218s0001g03260	VIT_218s0001g03260.1	TIR,PF01582.21,NB-ARC,PF00931.23,TIR_2,PF13676.7,LRR_8,PF13855.7,LRR_4,PF12799.8	'No_CC'	gi|302125458|emb|CBI35545.3|unnamed protein product [Vitis vinifera]
TIR-NBS-LRR	VIT_218s0001g03710	VIT_218s0001g03710.1	TIR,PF01582.21,LRR_4,PF12799.8,LRR_8,PF13855.7,NB-ARC,PF00931.23,TIR_2,PF13676.7,AAA,PF00004.30	'No_CC'	gi|359495250|ref|XP_002271616.2|PREDICTED: TMV resistance protein N-like [Vitis vinifera]
TIR-NBS-LRR	VIT_218s0001g03900	VIT_218s0001g03900.1	TIR,PF01582.21,NB-ARC,PF00931.23,TIR_2,PF13676.7,LRR_8,PF13855.7,LRR_4,PF12799.8	'No_CC'	gi|297740948|emb|CBI31260.3|unnamed protein product [Vitis vinifera]
TIR-NBS	VIT_218s0001g05050	VIT_218s0001g05050.1	TIR,PF01582.21,NB-ARC,PF00931.23,TIR_2,PF13676.7	'No_CC'	gi|297740985|emb|CBI31297.3|unnamed protein product [Vitis vinifera]
TIR-NBS-LRR	VIT_218s0001g06240	VIT_218s0001g06240.1	TIR,PF01582.21,NB-ARC,PF00931.23,TIR_2,PF13676.7,LRR_4,PF12799.8,LRR_3,PF07725.13,LRR_8,PF13855.7	'No_CC'	gi|147853075|emb|CAN83385.1|hypothetical protein VITISV_004581 [Vitis vinifera]
TIR-NBS-LRR	VIT_218s0001g06340	VIT_218s0001g06340.1	TIR,PF01582.21,NB-ARC,PF00931.23,TIR_2,PF13676.7,LRR_4,PF12799.8	'No_CC'	gi|297741031|emb|CBI31343.3|unnamed protein product [Vitis vinifera]
TIR-NBS	VIT_218s0001g06380	VIT_218s0001g06380.1	NB-ARC,PF00931.23,TIR,PF01582.21	'No_CC'	gi|359493410|ref|XP_002279970.2|PREDICTED: TMV resistance protein N-like [Vitis vinifera]
NBS	VIT_218s0001g07270	VIT_218s0001g07270.2	NB-ARC,PF00931.23,Rx_N,PF18052.2	'No_CC'	gi|302142038|emb|CBI19241.3|unnamed protein product [Vitis vinifera]
NBS	VIT_218s0001g11250	VIT_218s0001g11250.1	NB-ARC,PF00931.23,RPW8,PF05659.12	'No_CC'	gi|225458497|ref|XP_002284172.1|PREDICTED: probable disease resistance protein At4g33300-like [Vitis vinifera]
TIR-NBS	VIT_218s0041g00190	VIT_218s0041g00190.1	TIR,PF01582.21,NB-ARC,PF00931.23,TIR_2,PF13676.7	'No_CC'	gi|147858727|emb|CAN82909.1|hypothetical protein VITISV_025072 [Vitis vinifera]
NBS-LRR	VIT_218s0041g00200	VIT_218s0041g00200.1	NB-ARC,PF00931.23,LRR_4,PF12799.8,LRR_8,PF13855.7	'No_CC'	gi|296089535|emb|CBI39354.3|unnamed protein product [Vitis vinifera]
NBS-LRR	VIT_218s0041g00250	VIT_218s0041g00250.1	NB-ARC,PF00931.23,LRR_4,PF12799.8,LRR_8,PF13855.7	'No_CC'	gi|359493483|ref|XP_003634610.1|PREDICTED: TMV resistance protein N-like, partial [Vitis vinifera]
NBS-LRR	VIT_218s0041g00270	VIT_218s0041g00270.1	NB-ARC,PF00931.23,LRR_4,PF12799.8	'No_CC'	gi|147821539|emb|CAN67781.1|hypothetical protein VITISV_006408 [Vitis vinifera]
TIR-NBS-LRR	VIT_218s0041g01330	VIT_218s0041g01330.1	TIR,PF01582.21,NB-ARC,PF00931.23,TIR_2,PF13676.7,LRR_4,PF12799.8,LRR_3,PF07725.13	'No_CC'	gi|296089468|emb|CBI39287.3|unnamed protein product [Vitis vinifera]
TIR-NBS-LRR	VIT_218s0041g01340	VIT_218s0041g01340.1	TIR,PF01582.21,NB-ARC,PF00931.23,TIR_2,PF13676.7,LRR_4,PF12799.8	'No_CC'	gi|359493410|ref|XP_002279970.2|PREDICTED: TMV resistance protein N-like [Vitis vinifera]
TIR-NBS-LRR	VIT_218s0041g01620	VIT_218s0041g01620.1	LRR_8,PF13855.7,LRR_4,PF12799.8,NB-ARC,PF00931.23,TIR,PF01582.21	'No_CC'	gi|296089445|emb|CBI39264.3|unnamed protein product [Vitis vinifera]
TIR-NBS-LRR	VIT_218s0041g01750	VIT_218s0041g01750.1	TIR,PF01582.21,NB-ARC,PF00931.23,LRR_4,PF12799.8,LRR_8,PF13855.7,TIR_2,PF13676.7,LRR_3,PF07725.13	'No_CC'	gi|225460287|ref|XP_002279207.1|PREDICTED: TMV resistance protein N-like [Vitis vinifera]
TIR-NBS-LRR	VIT_218s0041g02120	VIT_218s0041g02120.1	TIR,PF01582.21,NB-ARC,PF00931.23,LRR_4,PF12799.8,LRR_8,PF13855.7,TIR_2,PF13676.7	'No_CC'	gi|147834354|emb|CAN69843.1|hypothetical protein VITISV_019700 [Vitis vinifera]
TIR-NBS	VIT_218s0041g02180	VIT_218s0041g02180.3	TIR,PF01582.21,DA1-like,PF12315.9,NB-ARC,PF00931.23,TIR_2,PF13676.7,LIM,PF00412.23	'No_CC'	gi|359493359|ref|XP_002278158.2|PREDICTED: protein DA1-related 1-like [Vitis vinifera]
NBS	VIT_218s0041g02190	VIT_218s0041g02190.1	NB-ARC,PF00931.23,LIM,PF00412.23	'No_CC'	gi|359493357|ref|XP_002278137.2|PREDICTED: protein DA1-related 1-like [Vitis vinifera]
TIR-NBS-LRR	VIT_218s0041g02440	VIT_218s0041g02440.1	TIR,PF01582.21,NB-ARC,PF00931.23,TIR_2,PF13676.7,LRR_4,PF12799.8	'No_CC'	gi|359493343|ref|XP_002277693.2|PREDICTED: TMV resistance protein N-like [Vitis vinifera]
TIR-NBS	VIT_218s0041g02450	VIT_218s0041g02450.1	NB-ARC,PF00931.23,TIR,PF01582.21,TIR_2,PF13676.7	'No_CC'	gi|359493341|ref|XP_003634573.1|PREDICTED: probable disease resistance protein At5g63020-like [Vitis vinifera]
TIR-NBS	VIT_218s0072g01230	VIT_218s0072g01230.1	TIR,PF01582.21,NB-ARC,PF00931.23,TIR_2,PF13676.7	'No_CC'	gi|296081130|emb|CBI18156.3|unnamed protein product [Vitis vinifera]
TIR-NBS-LRR	VIT_218s0075g00480	VIT_218s0075g00480.2	TIR,PF01582.21,LRR_4,PF12799.8,NB-ARC,PF00931.23,LRR_8,PF13855.7,TIR_2,PF13676.7	'No_CC'	gi|147821054|emb|CAN77694.1|hypothetical protein VITISV_029044 [Vitis vinifera]
TIR-NBS-LRR	VIT_218s0089g00060	VIT_218s0089g00060.2	TIR,PF01582.21,NB-ARC,PF00931.23,TIR_2,PF13676.7,AAA_16,PF13191.7,LRR_8,PF13855.7	'No_CC'	gi|147774169|emb|CAN63551.1|hypothetical protein VITISV_032106 [Vitis vinifera]
TIR-NBS-LRR	VIT_218s0089g00090	VIT_218s0089g00090.1	TIR,PF01582.21,NB-ARC,PF00931.23,TIR_2,PF13676.7,LRR_4,PF12799.8,LRR_8,PF13855.7,AAA_16,PF13191.7	'No_CC'	gi|297734814|emb|CBI17048.3|unnamed protein product [Vitis vinifera]
TIR-NBS-LRR	VIT_218s0089g00100	VIT_218s0089g00100.1	TIR,PF01582.21,LRR_8,PF13855.7,LRR_4,PF12799.8,TIR_2,PF13676.7,NB-ARC,PF00931.23,AAA_16,PF13191.7	'No_CC'	gi|297734813|emb|CBI17047.3|unnamed protein product [Vitis vinifera]
TIR-NBS	VIT_218s0089g00600	VIT_218s0089g00600.1	TIR,PF01582.21,NB-ARC,PF00931.23,TIR_2,PF13676.7	'No_CC'	gi|359493549|ref|XP_002268091.2|PREDICTED: TMV resistance protein N-like [Vitis vinifera]
NBS	VIT_218s0117g00020	VIT_218s0117g00020.1	NB-ARC,PF00931.23,NACHT,PF05729.13	'No_CC'	gi|359493295|ref|XP_002273513.2|PREDICTED: TMV resistance protein N-like [Vitis vinifera]
NBS-LRR	VIT_218s0117g00080	VIT_218s0117g00080.1	NB-ARC,PF00931.23,LRR_8,PF13855.7,LRR_4,PF12799.8	'No_CC'	gi|359493289|ref|XP_003634561.1|PREDICTED: putative disease resistance protein At4g11170-like [Vitis vinifera]
NBS-LRR	VIT_218s0117g00360	VIT_218s0117g00360.1	NB-ARC,PF00931.23,LRR_8,PF13855.7,LRR_4,PF12799.8	'No_CC'	gi|359493275|ref|XP_002272079.2|PREDICTED: TMV resistance protein N-like [Vitis vinifera]
NBS-LRR	VIT_219s0014g00570	VIT_219s0014g00570.1	LRR_8,PF13855.7,NB-ARC,PF00931.23	'No_CC'	gi|302142838|emb|CBI20133.3|unnamed protein product [Vitis vinifera]
CC-NBS	VIT_219s0014g00580	VIT_219s0014g00580.1	NB-ARC,PF00931.23	'CC_region'	gi|302142839|emb|CBI20134.3|unnamed protein product [Vitis vinifera]
NBS-LRR	VIT_219s0014g00870	VIT_219s0014g00870.1	BES1_N,PF05687.14,NB-ARC,PF00931.23,LRR_8,PF13855.7	'No_CC'	gi|359493997|ref|XP_002283439.2|PREDICTED: probable disease resistance protein At4g27220-like [Vitis vinifera]
NBS-LRR	VIT_219s0014g00900	VIT_219s0014g00900.1	NB-ARC,PF00931.23,LRR_8,PF13855.7	'No_CC'	gi|359493997|ref|XP_002283439.2|PREDICTED: probable disease resistance protein At4g27220-like [Vitis vinifera]
CC-NBS-LRR	VIT_219s0014g00920	VIT_219s0014g00920.1	NB-ARC,PF00931.23,LRR_8,PF13855.7	'CC_region'	gi|225461744|ref|XP_002283414.1|PREDICTED: probable disease resistance protein At4g27220-like [Vitis vinifera]
NBS	VIT_219s0014g03950	VIT_219s0014g03950.1	NB-ARC,PF00931.23	'No_CC'	gi|302143107|emb|CBI20402.3|unnamed protein product [Vitis vinifera]
CC-NBS-LRR	VIT_219s0014g05135	VIT_219s0014g05135.1	NB-ARC,PF00931.23,LRR_8,PF13855.7,LRR_4,PF12799.8	'CC_region'	gi|225461136|ref|XP_002280016.1|PREDICTED: disease resistance protein At4g27190-like [Vitis vinifera]
NBS-LRR	VIT_219s0014g05150	VIT_219s0014g05150.2	NB-ARC,PF00931.23,LRR_4,PF12799.8,LRR_8,PF13855.7,TniB,PF05621.12,AAA_22,PF13401.7	'No_CC'	gi|359493751|ref|XP_002279982.2|PREDICTED: disease resistance protein At4g27190-like [Vitis vinifera]
NBS-LRR	VIT_219s0014g05160	VIT_219s0014g05160.1	NB-ARC,PF00931.23,LRR_8,PF13855.7,LRR_4,PF12799.8,TniB,PF05621.12,AAA_22,PF13401.7	'No_CC'	gi|225461130|ref|XP_002279972.1|PREDICTED: disease resistance protein At4g27190 [Vitis vinifera]
CC-NBS-LRR	VIT_219s0014g05170	VIT_219s0014g05170.1	NB-ARC,PF00931.23,LRR_8,PF13855.7,LRR_4,PF12799.8	'CC_region'	gi|359493753|ref|XP_003634660.1|PREDICTED: disease resistance protein At4g27190-like [Vitis vinifera]
CC-NBS-LRR	VIT_219s0014g05180	VIT_219s0014g05180.1	NB-ARC,PF00931.23,LRR_8,PF13855.7,LRR_4,PF12799.8	'CC_region'	gi|359493753|ref|XP_003634660.1|PREDICTED: disease resistance protein At4g27190-like [Vitis vinifera]
NBS-LRR	VIT_219s0015g01543	VIT_219s0015g01543.1	NB-ARC,PF00931.23,Rx_N,PF18052.2,LRR_8,PF13855.7	'No_CC'	gi|224138300|ref|XP_002326568.1|cc-nbs-lrr resistance protein [Populus trichocarpa]
NBS	VIT_219s0015g01800	VIT_219s0015g01800.1	NB-ARC,PF00931.23	'No_CC'	gi|359494251|ref|XP_002265136.2|PREDICTED: uncharacterized protein LOC100246258 [Vitis vinifera]
NBS	VIT_219s0015g02492	VIT_219s0015g02492.1	NB-ARC,PF00931.23	'No_CC'	gi|147779724|emb|CAN67213.1|hypothetical protein VITISV_041237 [Vitis vinifera]
NBS	VIT_219s0015g02955	VIT_219s0015g02955.1	NB-ARC,PF00931.23	'No_CC'	gi|147779724|emb|CAN67213.1|hypothetical protein VITISV_041237 [Vitis vinifera]
NBS-LRR	VIT_219s0027g00660	VIT_219s0027g00660.1	NB-ARC,PF00931.23,LRR_4,PF12799.8,LRR_8,PF13855.7	'No_CC'	gi|296082767|emb|CBI21772.3|unnamed protein product [Vitis vinifera]
NBS-LRR	VIT_219s0027g01070	VIT_219s0027g01070.1	NB-ARC,PF00931.23,LRR_8,PF13855.7	'No_CC'	gi|296082732|emb|CBI21737.3|unnamed protein product [Vitis vinifera]
NBS-LRR	VIT_219s0027g01170	VIT_219s0027g01170.1	NB-ARC,PF00931.23,Rx_N,PF18052.2,LRR_8,PF13855.7	'No_CC'	gi|359494531|ref|XP_003634798.1|PREDICTED: putative disease resistance protein RGA4-like [Vitis vinifera]
NBS-LRR	VIT_219s0027g01330	VIT_219s0027g01330.1	NB-ARC,PF00931.23,LRR_8,PF13855.7,LRR_4,PF12799.8	'No_CC'	gi|359494517|ref|XP_002268065.2|PREDICTED: putative disease resistance protein RGA3-like [Vitis vinifera]
NBS-LRR	VIT_219s0027g01350	VIT_219s0027g01350.2	NB-ARC,PF00931.23,Rx_N,PF18052.2,LRR_8,PF13855.7	'No_CC'	gi|359494517|ref|XP_002268065.2|PREDICTED: putative disease resistance protein RGA3-like [Vitis vinifera]
NBS	VIT_219s0027g01400	VIT_219s0027g01400.1	NB-ARC,PF00931.23,Rx_N,PF18052.2	'No_CC'	gi|296082708|emb|CBI21713.3|unnamed protein product [Vitis vinifera]
NBS	VIT_219s0027g01490	VIT_219s0027g01490.1	NB-ARC,PF00931.23,Rx_N,PF18052.2	'No_CC'	gi|296082713|emb|CBI21718.3|unnamed protein product [Vitis vinifera]
CC-NBS	VIT_219s0027g01542	VIT_219s0027g01542.1	NB-ARC,PF00931.23	'CC_region'	gi|147841099|emb|CAN75206.1|hypothetical protein VITISV_008096 [Vitis vinifera]
CC-NBS	VIT_219s0027g01546	VIT_219s0027g01546.1	NB-ARC,PF00931.23	'CC_region'	gi|225465095|ref|XP_002266588.1|PREDICTED: probable disease resistance protein At5g63020 [Vitis vinifera]
CC-NBS-LRR	VIT_219s0027g01570	VIT_219s0027g01570.1	NB-ARC,PF00931.23,LRR_8,PF13855.7	'CC_region'	gi|359494507|ref|XP_002266513.2|PREDICTED: probable disease resistance protein At1g12280-like [Vitis vinifera]
NBS-LRR	VIT_219s0027g01580	VIT_219s0027g01580.1	NB-ARC,PF00931.23,LRR_8,PF13855.7,AAA_22,PF13401.7	'No_CC'	gi|225465089|ref|XP_002266478.1|PREDICTED: probable disease resistance protein At1g12280 [Vitis vinifera]
NBS	VIT_219s0027g01590	VIT_219s0027g01590.1	NB-ARC,PF00931.23	'No_CC'	gi|296082691|emb|CBI21696.3|unnamed protein product [Vitis vinifera]
CC-NBS-LRR	VIT_219s0027g01630	VIT_219s0027g01630.1	NB-ARC,PF00931.23,LRR_8,PF13855.7,LRR_4,PF12799.8	'CC_region'	gi|225465083|ref|XP_002266249.1|PREDICTED: probable disease resistance protein At5g63020-like [Vitis vinifera]
CC-NBS-LRR	VIT_219s0027g01631	VIT_219s0027g01631.1	NB-ARC,PF00931.23,LRR_8,PF13855.7,LRR_4,PF12799.8	'CC_region'	gi|147815260|emb|CAN74430.1|hypothetical protein VITISV_010987 [Vitis vinifera]
CC-NBS	VIT_219s0027g01700	VIT_219s0027g01700.1	NB-ARC,PF00931.23	'CC_region'	gi|359494497|ref|XP_003634789.1|PREDICTED: disease resistance protein RPS5-like [Vitis vinifera]
NBS	VIT_219s0027g01720	VIT_219s0027g01720.1	NB-ARC,PF00931.23	'No_CC'	gi|359494497|ref|XP_003634789.1|PREDICTED: disease resistance protein RPS5-like [Vitis vinifera]
CC-NBS	VIT_219s0027g01730	VIT_219s0027g01730.1	NB-ARC,PF00931.23	'CC_region'	gi|359494493|ref|XP_002265648.2|PREDICTED: probable disease resistance protein At5g63020 [Vitis vinifera]
CC-NBS-LRR	VIT_219s0027g01740	VIT_219s0027g01740.1	NB-ARC,PF00931.23,LRR_8,PF13855.7	'CC_region'	gi|359494495|ref|XP_002265715.2|PREDICTED: disease resistance protein RPS5-like [Vitis vinifera]
CC-NBS	VIT_219s0027g01745	VIT_219s0027g01745.1	NB-ARC,PF00931.23,AAA_22,PF13401.7	'CC_region'	gi|225465083|ref|XP_002266249.1|PREDICTED: probable disease resistance protein At5g63020-like [Vitis vinifera]
CC-NBS	VIT_219s0027g01750	VIT_219s0027g01750.1	NB-ARC,PF00931.23	'CC_region'	gi|147858210|emb|CAN79676.1|hypothetical protein VITISV_011750 [Vitis vinifera]
CC-NBS-LRR	VIT_219s0027g01780	VIT_219s0027g01780.1	NB-ARC,PF00931.23,LRR_8,PF13855.7	'CC_region'	gi|359494489|ref|XP_002265529.2|PREDICTED: disease resistance protein RPS5-like [Vitis vinifera]
NBS-LRR	VIT_219s0085g00440	VIT_219s0085g00440.1	NB-ARC,PF00931.23,Rx_N,PF18052.2,LRR_4,PF12799.8,LRR_8,PF13855.7	'No_CC'	gi|147772086|emb|CAN60242.1|hypothetical protein VITISV_018142 [Vitis vinifera]
CC-NBS-LRR	VIT_219s0090g00240	VIT_219s0090g00240.1	NB-ARC,PF00931.23,LRR_4,PF12799.8,LRR_8,PF13855.7	'CC_region'	gi|359494129|ref|XP_002278428.2|PREDICTED: disease resistance protein At4g27190-like [Vitis vinifera]
NBS-LRR	VIT_219s0090g00260	VIT_219s0090g00260.1	NB-ARC,PF00931.23,LRR_4,PF12799.8,LRR_8,PF13855.7	'No_CC'	gi|359494129|ref|XP_002278428.2|PREDICTED: disease resistance protein At4g27190-like [Vitis vinifera]
NBS	VIT_219s0093g00050	VIT_219s0093g00050.1	NB-ARC,PF00931.23,Rx_N,PF18052.2	'No_CC'	gi|359494419|ref|XP_002264230.2|PREDICTED: putative disease resistance protein RGA3-like [Vitis vinifera]
CC-NBS-LRR	VIT_219s0093g00380	VIT_219s0093g00380.1	NB-ARC,PF00931.23,LRR_8,PF13855.7,LRR_4,PF12799.8,TniB,PF05621.12	'CC_region'	gi|225466936|ref|XP_002262628.1|PREDICTED: disease resistance protein At4g27190-like [Vitis vinifera]

## Sheet: Arabidopsis thaliana
Class	Gene_id	protein_id	NBS_domain/ids	CC_domain_Predicted	Descript
NBS	AT1G10920	AT1G10920.1	NB-ARC,PF00931.23	'No_CC'	Putative inactive disease susceptibility protein LOV1
CC-NBS-LRR	AT1G12210	AT1G12210.1	NB-ARC,PF00931.23,LRR_8,PF13855.7,LRR_4,PF12799.8	'CC_region'	Disease resistance protein RFL1
NBS-LRR	AT1G12220	AT1G12220.2	NB-ARC,PF00931.23,LRR_8,PF13855.7,LRR_4,PF12799.8	'No_CC'	Disease resistance protein
CC-NBS-LRR	AT1G12280	AT1G12280.1	NB-ARC,PF00931.23,LRR_8,PF13855.7,LRR_4,PF12799.8	'CC_region'	Disease resistance protein SUMM2
CC-NBS-LRR	AT1G12290	AT1G12290.1	NB-ARC,PF00931.23,LRR_8,PF13855.7,LRR_4,PF12799.8	'CC_region'	Probable disease resistance protein At1g12290
CC-NBS-LRR	AT1G15890	AT1G15890.1	NB-ARC,PF00931.23,LRR_8,PF13855.7,LRR_4,PF12799.8	'CC_region'	Probable disease resistance protein At1g15890
TIR-NBS-LRR	AT1G17600	AT1G17600.1	TIR,PF01582.21,NB-ARC,PF00931.23,TIR_2,PF13676.7,LRR_4,PF12799.8,LRR_3,PF07725.13,LRR_8,PF13855.7	'No_CC'	Disease resistance protein (TIR-NBS-LRR class) family
TIR-NBS	AT1G17610	AT1G17610.1	NB-ARC,PF00931.23,TIR,PF01582.21	'No_CC'	Disease resistance protein CHS1
TIR-NBS	AT1G17615	AT1G17615.1	TIR,PF01582.21,TIR_2,PF13676.7,NB-ARC,PF00931.23	'No_CC'	Disease resistance protein (TIR-NBS class)
TIR-NBS-LRR	AT1G27170	AT1G27170.2	NB-ARC,PF00931.23,TIR,PF01582.21,LRR_8,PF13855.7,LRR_4,PF12799.8,TIR_2,PF13676.7,AAA_16,PF13191.7	'No_CC'	Transmembrane receptors / ATP binding protein
TIR-NBS-LRR	AT1G27180	AT1G27180.1	TIR,PF01582.21,NB-ARC,PF00931.23,TIR_2,PF13676.7,LRR_8,PF13855.7,LRR_4,PF12799.8,AAA_16,PF13191.7	'No_CC'	Disease resistance protein (TIR-NBS-LRR class)
TIR-NBS-LRR	AT1G31540	AT1G31540.2	TIR,PF01582.21,NB-ARC,PF00931.23,TIR_2,PF13676.7,LRR_3,PF07725.13,AAA_16,PF13191.7	'No_CC'	Disease resistance protein (TIR-NBS-LRR class) family
NBS	AT1G33560	AT1G33560.1	NB-ARC,PF00931.23,RPW8,PF05659.12	'No_CC'	Disease resistance protein ADR1
CC-NBS	AT1G50180	AT1G50180.1	NB-ARC,PF00931.23,Rx_N,PF18052.2,AAA_22,PF13401.7	'CC_region'	Putative disease resistance protein At1g50180
CC-NBS-LRR	AT1G51480	AT1G51480.1	NB-ARC,PF00931.23,LRR_8,PF13855.7,LRR_4,PF12799.8	'CC_region'	Probable disease resistance protein At1g51480
NBS	AT1G52660	AT1G52660.1	NB-ARC,PF00931.23	'No_CC'	P-loop containing nucleoside triphosphate hydrolases superfamily protein
CC-NBS	AT1G53350	AT1G53350.1	NB-ARC,PF00931.23,Rx_N,PF18052.2,AAA_16,PF13191.7	'CC_region'	Probable disease resistance RPP8-like protein 2
TIR-NBS-LRR	AT1G56510	AT1G56510.1	TIR,PF01582.21,NB-ARC,PF00931.23,TIR_2,PF13676.7,LRR_3,PF07725.13,LRR_4,PF12799.8	'No_CC'	Disease resistance protein ADR2
TIR-NBS-LRR	AT1G56520	AT1G56520.2	TIR,PF01582.21,NB-ARC,PF00931.23,LRR_4,PF12799.8,LRR_3,PF07725.13,TIR_2,PF13676.7,LRR_8,PF13855.7	'No_CC'	Disease resistance protein (TIR-NBS-LRR class) family
TIR-NBS-LRR	AT1G56540	AT1G56540.1	TIR,PF01582.21,NB-ARC,PF00931.23,LRR_3,PF07725.13,TIR_2,PF13676.7,LRR_4,PF12799.8,AAA_16,PF13191.7	'No_CC'	Disease resistance protein (TIR-NBS-LRR class) family
CC-NBS	AT1G58390	AT1G58390.1	NB-ARC,PF00931.23,Rx_N,PF18052.2,AAA_22,PF13401.7	'CC_region'	Probable disease resistance protein At1g58390
CC-NBS	AT1G58400	AT1G58400.2	NB-ARC,PF00931.23,Rx_N,PF18052.2,AAA_22,PF13401.7	'CC_region'	Putative disease resistance protein At1g58400
CC-NBS	AT1G58410	AT1G58410.4	NB-ARC,PF00931.23,Rx_N,PF18052.2	'CC_region'	Probable disease resistance protein RXW24L
CC-NBS-LRR	AT1G58602	AT1G58602.2	NB-ARC,PF00931.23,Rx_N,PF18052.2,LRR_4,PF12799.8	'CC_region'	Putative uncharacterized protein
CC-NBS	AT1G58807	AT1G58807.1	NB-ARC,PF00931.23,Rx_N,PF18052.2	'CC_region'	Probable disease resistance protein RF45
NBS-LRR	AT1G58848	AT1G58848.2	NB-ARC,PF00931.23,Rx_N,PF18052.2,LRR_4,PF12799.8	'No_CC'	Probable disease resistance protein RDL6
CC-NBS	AT1G59124	AT1G59124.2	NB-ARC,PF00931.23,Rx_N,PF18052.2	'CC_region'	Probable disease resistance protein RF45
NBS-LRR	AT1G59218	AT1G59218.1	NB-ARC,PF00931.23,Rx_N,PF18052.2,LRR_4,PF12799.8	'No_CC'	Probable disease resistance protein RDL6
NBS	AT1G59620	AT1G59620.2	NB-ARC,PF00931.23,AAA_16,PF13191.7,AAA_22,PF13401.7	'No_CC'	Disease resistance protein (CC-NBS-LRR class) family
NBS	AT1G59780	AT1G59780.1	NB-ARC,PF00931.23,Rx_N,PF18052.2	'No_CC'	Putative disease resistance protein At1g59780
CC-NBS-LRR	AT1G61180	AT1G61180.2	NB-ARC,PF00931.23,LRR_8,PF13855.7,LRR_4,PF12799.8	'CC_region'	LRR and NB-ARC domains-containing disease resistance protein
CC-NBS-LRR	AT1G61190	AT1G61190.1	NB-ARC,PF00931.23,LRR_8,PF13855.7	'CC_region'	Probable disease resistance protein At1g61190
NBS-LRR	AT1G61300	AT1G61300.1	NB-ARC,PF00931.23,LRR_8,PF13855.7,LRR_4,PF12799.8	'No_CC'	Probable disease resistance protein At1g61300
CC-NBS-LRR	AT1G61310	AT1G61310.1	NB-ARC,PF00931.23,LRR_8,PF13855.7,LRR_4,PF12799.8	'CC_region'	LRR and NB-ARC domains-containing disease resistance protein
CC-NBS-LRR	AT1G62630	AT1G62630.1	NB-ARC,PF00931.23,LRR_8,PF13855.7,LRR_4,PF12799.8	'CC_region'	Probable disease resistance protein At1g62630
CC-NBS-LRR	AT1G63350	AT1G63350.2	NB-ARC,PF00931.23,LRR_8,PF13855.7,LRR_4,PF12799.8	'CC_region'	Disease resistance protein (CC-NBS-LRR class) family
CC-NBS-LRR	AT1G63360	AT1G63360.1	NB-ARC,PF00931.23,LRR_8,PF13855.7	'CC_region'	Probable disease resistance protein At1g63360
TIR-NBS-LRR	AT1G63730	AT1G63730.1	TIR,PF01582.21,NB-ARC,PF00931.23,TIR_2,PF13676.7,LRR_3,PF07725.13,LRR_4,PF12799.8	'No_CC'	Disease resistance protein (TIR-NBS-LRR class) family
TIR-NBS-LRR	AT1G63740	AT1G63740.2	TIR,PF01582.21,NB-ARC,PF00931.23,TIR_2,PF13676.7,LRR_3,PF07725.13,ATPase_2,PF01637.19,AAA_16,PF13191.7,LRR_4,PF12799.8,LRR_8,PF13855.7	'No_CC'	Disease resistance protein (TIR-NBS-LRR class) family
TIR-NBS-LRR	AT1G63750	AT1G63750.3	TIR,PF01582.21,NB-ARC,PF00931.23,LRR_4,PF12799.8,LRR_8,PF13855.7,TIR_2,PF13676.7,LRR_3,PF07725.13	'No_CC'	Disease resistance protein (TIR-NBS-LRR class) family
TIR-NBS	AT1G63860	AT1G63860.1	TIR,PF01582.21,NB-ARC,PF00931.23,TIR_2,PF13676.7	'No_CC'	Disease resistance protein (TIR-NBS-LRR class) family
TIR-NBS-LRR	AT1G63870	AT1G63870.1	TIR,PF01582.21,NB-ARC,PF00931.23,LRR_3,PF07725.13,LRR_8,PF13855.7,TIR_2,PF13676.7,LRR_4,PF12799.8	'No_CC'	Disease resistance protein (TIR-NBS-LRR class) family
TIR-NBS-LRR	AT1G63880	AT1G63880.1	TIR,PF01582.21,NB-ARC,PF00931.23,LRR_4,PF12799.8,LRR_8,PF13855.7,LRR_3,PF07725.13,TIR_2,PF13676.7,ATPase_2,PF01637.19	'No_CC'	Disease resistance protein RML1B
TIR-NBS-LRR	AT1G64070	AT1G64070.1	TIR,PF01582.21,NB-ARC,PF00931.23,TIR_2,PF13676.7,LRR_4,PF12799.8,LRR_8,PF13855.7	'No_CC'	Disease resistance protein RML1A
TIR-NBS-LRR	AT1G65850	AT1G65850.2	TIR,PF01582.21,NB-ARC,PF00931.23,TIR_2,PF13676.7,LRR_3,PF07725.13,LRR_4,PF12799.8	'No_CC'	Disease resistance protein (TIR-NBS-LRR class) family
TIR-NBS	AT1G66090	AT1G66090.1	TIR,PF01582.21,NB-ARC,PF00931.23,TIR_2,PF13676.7,AAA_22,PF13401.7	'No_CC'	Disease resistance protein (TIR-NBS class)
TIR-NBS-LRR	AT1G69550	AT1G69550.1	TIR,PF01582.21,LRR_4,PF12799.8,LRR_1,PF00560.34,NB-ARC,PF00931.23,TIR_2,PF13676.7,LRR_3,PF07725.13,LRR_8,PF13855.7	'No_CC'	Disease resistance protein (TIR-NBS-LRR class)
TIR-NBS-LRR	AT1G72840	AT1G72840.3	TIR,PF01582.21,NB-ARC,PF00931.23,TIR_2,PF13676.7,LRR_4,PF12799.8,LRR_8,PF13855.7,LRR_3,PF07725.13	'No_CC'	Disease resistance protein (TIR-NBS-LRR class)
TIR-NBS	AT1G72850	AT1G72850.1	TIR,PF01582.21,NB-ARC,PF00931.23,AAA_16,PF13191.7	'No_CC'	Disease resistance protein (TIR-NBS class)
TIR-NBS-LRR	AT1G72860	AT1G72860.2	TIR,PF01582.21,NB-ARC,PF00931.23,TIR_2,PF13676.7,LRR_4,PF12799.8,LRR_8,PF13855.7	'No_CC'	Disease resistance protein (TIR-NBS-LRR class) family
TIR-NBS	AT1G72870	AT1G72870.1	TIR,PF01582.21,NB-ARC,PF00931.23,TIR_2,PF13676.7	'No_CC'	Disease resistance protein (TIR-NBS class)
TIR-NBS	AT1G72890	AT1G72890.2	TIR,PF01582.21,TIR_2,PF13676.7,NB-ARC,PF00931.23	'No_CC'	Disease resistance protein (TIR-NBS class)
TIR-NBS	AT1G72900	AT1G72900.1	TIR,PF01582.21,TIR_2,PF13676.7,NB-ARC,PF00931.23	'No_CC'	Similar to part of disease resistance protein
TIR-NBS	AT1G72910	AT1G72910.1	TIR,PF01582.21,TIR_2,PF13676.7,NB-ARC,PF00931.23	'No_CC'	Similar to part of disease resistance protein
TIR-NBS	AT1G72940	AT1G72940.1	TIR,PF01582.21,TIR_2,PF13676.7,NB-ARC,PF00931.23	'No_CC'	At1g72940/F3N23_14
TIR-NBS	AT1G72950	AT1G72950.1	TIR,PF01582.21,TIR_2,PF13676.7,NB-ARC,PF00931.23	'No_CC'	Disease resistance protein (TIR-NBS class)
TIR-NBS-LRR	AT2G14080	AT2G14080.1	TIR,PF01582.21,NB-ARC,PF00931.23,LRR_4,PF12799.8,TIR_2,PF13676.7,LRR_3,PF07725.13,LRR_8,PF13855.7,AAA_16,PF13191.7	'No_CC'	Disease resistance protein (TIR-NBS-LRR class) family
TIR-NBS-LRR	AT2G16870	AT2G16870.1	TIR,PF01582.21,NB-ARC,PF00931.23,LRR_4,PF12799.8,LRR_3,PF07725.13,TIR_2,PF13676.7,LRR_8,PF13855.7	'No_CC'	Disease resistance protein (TIR-NBS-LRR class) family
TIR-NBS-LRR	AT2G17050	AT2G17050.2	LRR_4,PF12799.8,TIR,PF01582.21,LRR_8,PF13855.7,NB-ARC,PF00931.23,LRR_3,PF07725.13,TIR_2,PF13676.7	'No_CC'	disease resistance protein (TIR-NBS-LRR class), putative
TIR-NBS-LRR	AT2G17060	AT2G17060.1	TIR,PF01582.21,NB-ARC,PF00931.23,TIR_2,PF13676.7,LRR_8,PF13855.7,NACHT,PF05729.13,LRR_4,PF12799.8,AAA_16,PF13191.7,LRR_3,PF07725.13	'No_CC'	Disease resistance protein (TIR-NBS-LRR class) family
TIR-NBS	AT3G04210	AT3G04210.1	TIR,PF01582.21,NB-ARC,PF00931.23,TIR_2,PF13676.7,AAA_16,PF13191.7	'No_CC'	At3g04210/T6K12_17
TIR-NBS-LRR	AT3G04220	AT3G04220.3	TIR,PF01582.21,NB-ARC,PF00931.23,TIR_2,PF13676.7,LRR_8,PF13855.7,LRR_3,PF07725.13,LRR_4,PF12799.8	'No_CC'	Disease resistance protein (TIR-NBS-LRR class) family
NBS-LRR	AT3G07040	AT3G07040.1	NB-ARC,PF00931.23,Rx_N,PF18052.2,LRR_8,PF13855.7	'No_CC'	Disease resistance protein RPM1
NBS-LRR	AT3G14460	AT3G14460.1	NB-ARC,PF00931.23,LRR_4,PF12799.8,Rx_N,PF18052.2,LRR_8,PF13855.7	'No_CC'	Putative disease resistance protein At3g14460
NBS-LRR	AT3G14470	AT3G14470.1	NB-ARC,PF00931.23,Rx_N,PF18052.2,LRR_8,PF13855.7,LRR_4,PF12799.8	'No_CC'	Putative disease resistance RPP13-like protein 1
CC-NBS	AT3G15700	AT3G15700.1	NB-ARC,PF00931.23	'CC_region'	P-loop containing nucleoside triphosphate hydrolases superfamily protein
TIR-NBS-LRR	AT3G25505	AT3G25505.1	TIR,PF01582.21,LRR_3,PF07725.13	'No_CC'	TIR-NBS-LRR class disease resistance protein
NBS-LRR	AT3G25510	AT3G25510.2	NB-ARC,PF00931.23,LRR_4,PF12799.8,LRR_3,PF07725.13,LRR_8,PF13855.7	'No_CC'	Disease resistance protein (TIR-NBS-LRR class) family protein
TIR-NBS-LRR	AT3G44400	AT3G44400.3	TIR,PF01582.21,NB-ARC,PF00931.23,TIR_2,PF13676.7,LRR_4,PF12799.8,LRR_3,PF07725.13	'No_CC'	Disease resistance protein (TIR-NBS-LRR class) family
TIR-NBS-LRR	AT3G44480	AT3G44480.3	TIR,PF01582.21,NB-ARC,PF00931.23,TIR_2,PF13676.7,LRR_4,PF12799.8,LRR_3,PF07725.13	'No_CC'	Disease resistance protein (TIR-NBS-LRR class) family
TIR-NBS-LRR	AT3G44630	AT3G44630.3	TIR,PF01582.21,NB-ARC,PF00931.23,TIR_2,PF13676.7,LRR_3,PF07725.13,LRR_4,PF12799.8,TrwB_AAD_bind,PF10412.10	'No_CC'	Disease resistance protein (TIR-NBS-LRR class) family
TIR-NBS-LRR	AT3G44670	AT3G44670.1	TIR,PF01582.21,NB-ARC,PF00931.23,TIR_2,PF13676.7,LRR_4,PF12799.8,LRR_3,PF07725.13,TrwB_AAD_bind,PF10412.10	'No_CC'	Disease resistance protein (TIR-NBS-LRR class) family
NBS	AT3G46530	AT3G46530.1	NB-ARC,PF00931.23,Rx_N,PF18052.2	'No_CC'	Disease resistance protein RPP13
NBS	AT3G46710	AT3G46710.1	NB-ARC,PF00931.23,Rx_N,PF18052.2,AAA_22,PF13401.7	'No_CC'	Putative disease resistance RPP13-like protein 2
NBS	AT3G46730	AT3G46730.1	NB-ARC,PF00931.23,Rx_N,PF18052.2	'No_CC'	Putative disease resistance RPP13-like protein 3
CC-NBS	AT3G50950	AT3G50950.1	NB-ARC,PF00931.23,Rx_N,PF18052.2,AAA_18,PF13238.7	'CC_region'	Disease resistance RPP13-like protein 4
TIR-NBS-LRR	AT3G51560	AT3G51560.1	NB-ARC,PF00931.23,LRR_4,PF12799.8,TIR,PF01582.21,LRR_8,PF13855.7,LRR_3,PF07725.13,TIR_2,PF13676.7	'No_CC'	Disease resistance protein (TIR-NBS-LRR class) family
TIR-NBS-LRR	AT3G51570	AT3G51570.1	TIR,PF01582.21,NB-ARC,PF00931.23,TIR_2,PF13676.7,LRR_4,PF12799.8,LRR_8,PF13855.7,LRR_3,PF07725.13	'No_CC'	Disease resistance protein (TIR-NBS-LRR class) family
TIR-NBS-LRR	AT4G08450	AT4G08450.1	TIR,PF01582.21,NB-ARC,PF00931.23,TIR_2,PF13676.7,LRR_3,PF07725.13,LRR_4,PF12799.8,AAA_16,PF13191.7	'No_CC'	Disease resistance protein (TIR-NBS-LRR class) family
NBS-LRR	AT4G09360	AT4G09360.1	NB-ARC,PF00931.23,LRR_4,PF12799.8	'No_CC'	NB-ARC domain-containing disease resistance protein
TIR-NBS	AT4G09420	AT4G09420.1	TIR,PF01582.21,NB-ARC,PF00931.23,TIR_2,PF13676.7,AAA_22,PF13401.7,ATPase_2,PF01637.19	'No_CC'	Disease resistance protein (TIR-NBS class)
TIR-NBS	AT4G09430	AT4G09430.1	TIR,PF01582.21,NB-ARC,PF00931.23,TIR_2,PF13676.7	'No_CC'	Disease resistance protein (TIR-NBS-LRR class) family
CC-NBS-LRR	AT4G10780	AT4G10780.1	NB-ARC,PF00931.23,LRR_8,PF13855.7,LRR_4,PF12799.8	'CC_region'	Putative disease resistance protein At4g10780
TIR-NBS-LRR	AT4G11170	AT4G11170.1	TIR,PF01582.21,NB-ARC,PF00931.23,TIR_2,PF13676.7,LRR_3,PF07725.13,AAA_22,PF13401.7,AAA_16,PF13191.7	'No_CC'	Putative disease resistance protein At4g11170
TIR-NBS-LRR	AT4G12010	AT4G12010.1	TIR,PF01582.21,NB-ARC,PF00931.23,TIR_2,PF13676.7,LRR_8,PF13855.7,LRR_4,PF12799.8,LRR_3,PF07725.13	'No_CC'	Disease resistance-like protein DSC1
NBS-LRR	AT4G12020	AT4G12020.2	Pkinase,PF00069.26,PK_Tyr_Ser-Thr,PF07714.18,WRKY,PF03106.16,NB-ARC,PF00931.23,PAH,PF02671.22,LRR_4,PF12799.8,LRR_8,PF13855.7	'No_CC'	Probable WRKY transcription factor 19
TIR-NBS-LRR	AT4G14370	AT4G14370.2	TIR,PF01582.21,NB-ARC,PF00931.23,TIR_2,PF13676.7,LRR_8,PF13855.7,LRR_4,PF12799.8,LRR_3,PF07725.13	'No_CC'	Disease resistance protein (TIR-NBS-LRR class) family
TIR-NBS-LRR	AT4G16860	AT4G16860.1	TIR,PF01582.21,LRR_3,PF07725.13,NB-ARC,PF00931.23,LRR_4,PF12799.8,TIR_2,PF13676.7,LRR_8,PF13855.7,AAA_22,PF13401.7	'No_CC'	Disease resistance protein RPP4
TIR-NBS-LRR	AT4G16890	AT4G16890.1	TIR,PF01582.21,LRR_4,PF12799.8,NB-ARC,PF00931.23,LRR_3,PF07725.13,TIR_2,PF13676.7,LRR_8,PF13855.7,LRR_1,PF00560.34	'No_CC'	disease resistance protein (TIR-NBS-LRR class), putative
TIR-NBS-LRR	AT4G16900	AT4G16900.1	TIR,PF01582.21,NB-ARC,PF00931.23,LRR_3,PF07725.13,TIR_2,PF13676.7,LRR_4,PF12799.8	'No_CC'	Disease resistance protein (TIR-NBS-LRR class) family
TIR-NBS-LRR	AT4G16920	AT4G16920.2	TIR,PF01582.21,LRR_3,PF07725.13,NB-ARC,PF00931.23,LRR_4,PF12799.8,TIR_2,PF13676.7,LRR_8,PF13855.7	'No_CC'	Disease resistance protein (TIR-NBS-LRR class) family
TIR-NBS-LRR	AT4G16940	AT4G16940.2	TIR,PF01582.21,NB-ARC,PF00931.23,LRR_4,PF12799.8,LRR_3,PF07725.13,TIR_2,PF13676.7,AAA_22,PF13401.7	'No_CC'	Disease resistance protein (TIR-NBS-LRR class) family
TIR-NBS-LRR	AT4G16950	AT4G16950.1	TIR,PF01582.21,LRR_3,PF07725.13,LRR_4,PF12799.8,NB-ARC,PF00931.23,TIR_2,PF13676.7,LRR_8,PF13855.7,LRR_1,PF00560.34	'No_CC'	Disease resistance protein RPP5
TIR-NBS-LRR	AT4G16960	AT4G16960.1	TIR,PF01582.21,NB-ARC,PF00931.23,LRR_4,PF12799.8,TIR_2,PF13676.7,LRR_3,PF07725.13,AAA_22,PF13401.7	'No_CC'	Disease resistance protein (TIR-NBS-LRR class) family
TIR-NBS	AT4G16990	AT4G16990.7	BRX,PF08381.12,TIR,PF01582.21,NB-ARC,PF00931.23,TIR_2,PF13676.7	'No_CC'	disease resistance protein (TIR-NBS class), putative
NBS-LRR	AT4G19050	AT4G19050.1	LRR_4,PF12799.8,NB-ARC,PF00931.23,LRR_8,PF13855.7	'No_CC'	NB-ARC domain containing disease resistance protein
NBS	AT4G19060	AT4G19060.1	NB-ARC,PF00931.23	'No_CC'	Probable disease resistance protein At4g19060
TIR-NBS-LRR	AT4G19500	AT4G19500.1	TIR,PF01582.21,NB-ARC,PF00931.23,TIR_2,PF13676.7,AAA_22,PF13401.7,AAA_16,PF13191.7,DUF640,PF04852.13,LRR_3,PF07725.13,AAA_14,PF13173.7,NACHT,PF05729.13,LRR_4,PF12799.8	'No_CC'	Disease resistance protein RPP2A
TIR-NBS-LRR	AT4G19510	AT4G19510.4	TIR,PF01582.21,NB-ARC,PF00931.23,TIR_2,PF13676.7,LRR_4,PF12799.8,LRR_8,PF13855.7	'No_CC'	Disease resistance protein (TIR-NBS-LRR class)
TIR-NBS-LRR	AT4G19520	AT4G19520.1	TIR,PF01582.21,NB-ARC,PF00931.23,LRR_4,PF12799.8,TIR_2,PF13676.7,LRR_8,PF13855.7,LRR_3,PF07725.13	'No_CC'	Probable disease resistance protein At4g19520
TIR-NBS-LRR	AT4G19530	AT4G19530.2	TIR,PF01582.21,TIR_2,PF13676.7,NB-ARC,PF00931.23,LRR_4,PF12799.8,LRR_8,PF13855.7	'CC_region'	disease resistance protein (TIR-NBS-LRR class) family
CC-NBS-LRR	AT4G26090	AT4G26090.1	NB-ARC,PF00931.23,LRR_8,PF13855.7,LRR_4,PF12799.8	'CC_region'	Disease resistance protein RPS2
CC-NBS-LRR	AT4G27190	AT4G27190.1	NB-ARC,PF00931.23,LRR_4,PF12799.8,LRR_8,PF13855.7,AAA_22,PF13401.7	'CC_region'	Disease resistance protein At4g27190
NBS-LRR	AT4G27220	AT4G27220.2	NB-ARC,PF00931.23,LRR_4,PF12799.8,LRR_8,PF13855.7	'No_CC'	NB-ARC domain-containing disease resistance protein
NBS-LRR	AT4G33300	AT4G33300.2	NB-ARC,PF00931.23,RPW8,PF05659.12,LRR_4,PF12799.8	'No_CC'	Probable disease resistance protein At4g33300
TIR-NBS-LRR	AT4G36140	AT4G36140.1	TIR,PF01582.21,NB-ARC,PF00931.23,TIR_2,PF13676.7,AAA_22,PF13401.7,LRR_4,PF12799.8,AAA_16,PF13191.7,AAA_18,PF13238.7,AAA_33,PF13671.7,LRR_3,PF07725.13,AAA_14,PF13173.7,NACHT,PF05729.13	'No_CC'	Disease resistance protein (TIR-NBS-LRR class)
TIR-NBS-LRR	AT4G36150	AT4G36150.1	TIR,PF01582.21,NB-ARC,PF00931.23,TIR_2,PF13676.7,LRR_4,PF12799.8,LRR_8,PF13855.7	'No_CC'	Disease resistance protein (TIR-NBS-LRR class) family
NBS	AT5G04720	AT5G04720.1	NB-ARC,PF00931.23,RPW8,PF05659.12	'No_CC'	Probable disease resistance protein At5g04720
CC-NBS-LRR	AT5G05400	AT5G05400.1	NB-ARC,PF00931.23,LRR_8,PF13855.7	'CC_region'	Putative disease resistance protein At5g05400
TIR-NBS-LRR	AT5G11250	AT5G11250.2	TIR,PF01582.21,NB-ARC,PF00931.23,TIR_2,PF13676.7,LRR_3,PF07725.13	'No_CC'	Disease resistance protein (TIR-NBS-LRR class)
TIR-NBS-LRR	AT5G17680	AT5G17680.2	TIR,PF01582.21,NB-ARC,PF00931.23,LRR_4,PF12799.8,LRR_8,PF13855.7,TIR_2,PF13676.7,LRR_3,PF07725.13	'No_CC'	Disease resistance protein (TIR-NBS-LRR class)
TIR-NBS-LRR	AT5G17880	AT5G17880.1	TIR,PF01582.21,NB-ARC,PF00931.23,TIR_2,PF13676.7,LRR_4,PF12799.8,NACHT,PF05729.13,LRR_8,PF13855.7,LRR_3,PF07725.13,AAA_16,PF13191.7	'No_CC'	Disease resistance-like protein CSA1
CC-NBS-LRR	AT5G17890	AT5G17890.1	DA1-like,PF12315.9,NB-ARC,PF00931.23,LIM,PF00412.23,LRR_4,PF12799.8	'CC_region'	Protein DA1-related 4
TIR-NBS-LRR	AT5G17970	AT5G17970.1	TIR,PF01582.21,NB-ARC,PF00931.23,TIR_2,PF13676.7,LRR_4,PF12799.8,LRR_3,PF07725.13,NACHT,PF05729.13,LRR_8,PF13855.7	'No_CC'	Disease resistance protein-like
TIR-NBS-LRR	AT5G18350	AT5G18350.1	TIR,PF01582.21,NB-ARC,PF00931.23,LRR_4,PF12799.8,TIR_2,PF13676.7,LRR_8,PF13855.7,AAA_16,PF13191.7	'No_CC'	Disease resistance protein (TIR-NBS-LRR class) family
TIR-NBS-LRR	AT5G18360	AT5G18360.1	TIR,PF01582.21,NB-ARC,PF00931.23,TIR_2,PF13676.7,AAA_16,PF13191.7,LRR_3,PF07725.13,AAA_22,PF13401.7	'No_CC'	Disease resistance protein (TIR-NBS-LRR class) family
TIR-NBS-LRR	AT5G18370	AT5G18370.1	TIR,PF01582.21,NB-ARC,PF00931.23,TIR_2,PF13676.7,LRR_8,PF13855.7,LRR_3,PF07725.13,LRR_4,PF12799.8	'No_CC'	Disease resistance-like protein DSC2
TIR-NBS-LRR	AT5G22690	AT5G22690.2	TIR,PF01582.21,NB-ARC,PF00931.23,TIR_2,PF13676.7,LRR_3,PF07725.13,LRR_4,PF12799.8	'No_CC'	Disease resistance protein (TIR-NBS-LRR class) family
CC-NBS	AT5G35450	AT5G35450.1	NB-ARC,PF00931.23,Rx_N,PF18052.2	'CC_region'	Disease resistance RPP8-like protein 3
TIR-NBS-LRR	AT5G36930	AT5G36930.2	TIR,PF01582.21,NB-ARC,PF00931.23,TIR_2,PF13676.7,LRR_8,PF13855.7,LRR_4,PF12799.8	'No_CC'	Disease resistance protein (TIR-NBS-LRR class) family
TIR-NBS-LRR	AT5G38340	AT5G38340.1	TIR,PF01582.21,NB-ARC,PF00931.23,TIR_2,PF13676.7,LRR_3,PF07725.13	'No_CC'	Disease resistance protein (TIR-NBS-LRR class) family
NBS-LRR	AT5G38350	AT5G38350.1	NB-ARC,PF00931.23,LRR_4,PF12799.8,LRR_8,PF13855.7	'No_CC'	Disease resistance protein (NBS-LRR class) family
TIR-NBS-LRR	AT5G38850	AT5G38850.1	TIR,PF01582.21,NB-ARC,PF00931.23,TIR_2,PF13676.7,LRR_4,PF12799.8,LRR_8,PF13855.7,LRR_3,PF07725.13	'No_CC'	Disease resistance protein (TIR-NBS-LRR class)
NBS-LRR	AT5G40060	AT5G40060.1	NB-ARC,PF00931.23,LRR_3,PF07725.13,LRR_4,PF12799.8,AAA,PF00004.30,AAA_16,PF13191.7	'No_CC'	Disease resistance protein (NBS-LRR class) family
TIR-NBS	AT5G40090	AT5G40090.1	NB-ARC,PF00931.23,TIR,PF01582.21	'No_CC'	CHL1
TIR-NBS-LRR	AT5G40100	AT5G40100.1	TIR,PF01582.21,NB-ARC,PF00931.23,TIR_2,PF13676.7,LRR_3,PF07725.13,AAA_16,PF13191.7	'No_CC'	Disease resistance protein (TIR-NBS-LRR class) family
TIR-NBS-LRR	AT5G40910	AT5G40910.1	TIR,PF01582.21,NB-ARC,PF00931.23,LRR_4,PF12799.8,TIR_2,PF13676.7,LRR_3,PF07725.13,AAA_22,PF13401.7,LRR_8,PF13855.7,AAA_16,PF13191.7	'No_CC'	Disease resistance protein (TIR-NBS-LRR class) family
TIR-NBS-LRR	AT5G41540	AT5G41540.1	TIR,PF01582.21,NB-ARC,PF00931.23,TIR_2,PF13676.7,LRR_8,PF13855.7,LRR_3,PF07725.13,AAA_16,PF13191.7	'No_CC'	Disease resistance protein (TIR-NBS-LRR class) family
TIR-NBS-LRR	AT5G41550	AT5G41550.1	TIR,PF01582.21,NB-ARC,PF00931.23,LRR_8,PF13855.7,TIR_2,PF13676.7,LRR_4,PF12799.8,LRR_3,PF07725.13,AAA_16,PF13191.7	'No_CC'	Disease resistance protein (TIR-NBS-LRR class) family
TIR-NBS-LRR	AT5G41740	AT5G41740.2	TIR,PF01582.21,NB-ARC,PF00931.23,TIR_2,PF13676.7,LRR_4,PF12799.8,AAA_16,PF13191.7	'No_CC'	Disease resistance protein (TIR-NBS-LRR class) family
TIR-NBS-LRR	AT5G41750	AT5G41750.1	TIR,PF01582.21,NB-ARC,PF00931.23,TIR_2,PF13676.7,LRR_4,PF12799.8,LRR_8,PF13855.7,LRR_3,PF07725.13,AAA_16,PF13191.7	'No_CC'	Disease resistance protein (TIR-NBS-LRR class) family
CC-NBS	AT5G43470	AT5G43470.2	NB-ARC,PF00931.23,Rx_N,PF18052.2	'CC_region'	Disease resistance protein RPP8
CC-NBS-LRR	AT5G43730	AT5G43730.1	NB-ARC,PF00931.23,LRR_8,PF13855.7	'CC_region'	Probable disease resistance protein At5g43730
CC-NBS-LRR	AT5G43740	AT5G43740.2	NB-ARC,PF00931.23,LRR_8,PF13855.7	'CC_region'	Probable disease resistance protein At5g43740
TIR-NBS-LRR	AT5G44510	AT5G44510.1	TIR,PF01582.21,NB-ARC,PF00931.23,TIR_2,PF13676.7,LRR_4,PF12799.8,LRR_3,PF07725.13	'No_CC'	Disease resistance protein TAO1
TIR-NBS-LRR	AT5G44870	AT5G44870.1	TIR,PF01582.21,NB-ARC,PF00931.23,TIR_2,PF13676.7,LRR_4,PF12799.8,LRR_3,PF07725.13	'No_CC'	Disease resistance protein LAZ5
NBS-LRR	AT5G45050	AT5G45050.1	NB-ARC,PF00931.23,WRKY,PF03106.16,LRR_3,PF07725.13,LRR_4,PF12799.8	'No_CC'	Disease resistance protein RRS1B
TIR-NBS-LRR	AT5G45060	AT5G45060.1	TIR,PF01582.21,NB-ARC,PF00931.23,TIR_2,PF13676.7,LRR_3,PF07725.13,LRR_8,PF13855.7,AAA_16,PF13191.7,LRR_4,PF12799.8	'No_CC'	Disease resistance protein RPS4B
TIR-NBS-LRR	AT5G45200	AT5G45200.1	TIR,PF01582.21,NB-ARC,PF00931.23,LRR_8,PF13855.7,TIR_2,PF13676.7,LRR_3,PF07725.13	'No_CC'	Disease resistance protein (TIR-NBS-LRR class) family
TIR-NBS-LRR	AT5G45210	AT5G45210.4	NB-ARC,PF00931.23,TIR,PF01582.21,LRR_4,PF12799.8	'No_CC'	Disease resistance protein (TIR-NBS-LRR class) family
TIR-NBS-LRR	AT5G45230	AT5G45230.1	TIR,PF01582.21,NB-ARC,PF00931.23,TIR_2,PF13676.7,LRR_8,PF13855.7,NACHT,PF05729.13,AAA_14,PF13173.7,LRR_3,PF07725.13,AAA_16,PF13191.7	'No_CC'	Disease resistance protein (TIR-NBS-LRR class) family
TIR-NBS-LRR	AT5G45240	AT5G45240.1	TIR,PF01582.21,NB-ARC,PF00931.23,NACHT,PF05729.13,LRR_1,PF00560.34	'No_CC'	Disease resistance protein (TIR-NBS-LRR class)
TIR-NBS-LRR	AT5G45250	AT5G45250.1	TIR,PF01582.21,NB-ARC,PF00931.23,TIR_2,PF13676.7,LRR_8,PF13855.7,LRR_4,PF12799.8,LRR_3,PF07725.13,AAA_16,PF13191.7	'No_CC'	Disease resistance protein RPS4
NBS-LRR	AT5G45260	AT5G45260.1	WRKY,PF03106.16,NB-ARC,PF00931.23,LRR_4,PF12799.8,LRR_3,PF07725.13	'No_CC'	Disease resistance protein RRS1
NBS	AT5G45440	AT5G45440.1	NB-ARC,PF00931.23,AAA_16,PF13191.7,AAA_14,PF13173.7,AAA_22,PF13401.7,ATPase_2,PF01637.19	'No_CC'	Probable disease resistance protein At5g45440
NBS	AT5G45490	AT5G45490.2	NB-ARC,PF00931.23,AAA_16,PF13191.7	'No_CC'	Probable disease resistance protein At5g45490
TIR-NBS-LRR	AT5G46260	AT5G46260.1	TIR,PF01582.21,NB-ARC,PF00931.23,TIR_2,PF13676.7,LRR_3,PF07725.13,AAA_16,PF13191.7,LRR_5,PF13306.7	'No_CC'	Disease resistance protein (TIR-NBS-LRR class) family
TIR-NBS-LRR	AT5G46270	AT5G46270.4	TIR,PF01582.21,NB-ARC,PF00931.23,TIR_2,PF13676.7,LRR_3,PF07725.13,AAA_16,PF13191.7	'No_CC'	Disease resistance protein (TIR-NBS-LRR class) family
TIR-NBS-LRR	AT5G46450	AT5G46450.1	TIR,PF01582.21,NB-ARC,PF00931.23,TIR_2,PF13676.7,LRR_3,PF07725.13,LRR_4,PF12799.8	'No_CC'	Disease resistance protein (TIR-NBS-LRR class) family
TIR-NBS-LRR	AT5G46470	AT5G46470.1	TIR,PF01582.21,NB-ARC,PF00931.23,TIR_2,PF13676.7,LRR_8,PF13855.7,LRR_3,PF07725.13	'No_CC'	Disease resistance protein RPS6
TIR-NBS-LRR	AT5G46490	AT5G46490.2	TIR,PF01582.21,NB-ARC,PF00931.23,TIR_2,PF13676.7,LRR_3,PF07725.13,AAA_16,PF13191.7	'No_CC'	Disease resistance protein (TIR-NBS-LRR class) family
TIR-NBS-LRR	AT5G46510	AT5G46510.1	TIR,PF01582.21,NB-ARC,PF00931.23,TIR_2,PF13676.7,LRR_3,PF07725.13	'No_CC'	Disease resistance protein (TIR-NBS-LRR class) family
TIR-NBS-LRR	AT5G46520	AT5G46520.2	TIR,PF01582.21,NB-ARC,PF00931.23,TIR_2,PF13676.7,LRR_3,PF07725.13	'No_CC'	Disease resistance protein (TIR-NBS-LRR class) family
NBS-LRR	AT5G47250	AT5G47250.1	NB-ARC,PF00931.23,LRR_8,PF13855.7,LRR_4,PF12799.8	'No_CC'	Probable disease resistance protein At5g47250
CC-NBS-LRR	AT5G47260	AT5G47260.1	NB-ARC,PF00931.23,AIG1,PF04548.17,LRR_8,PF13855.7	'CC_region'	Probable disease resistance protein At5g47260
NBS	AT5G47280	AT5G47280.1	NB-ARC,PF00931.23	'No_CC'	Putative disease resistance protein At5g47280
CC-NBS	AT5G48620	AT5G48620.2	NB-ARC,PF00931.23,Rx_N,PF18052.2	'CC_region'	Probable disease resistance RPP8-like protein 4
TIR-NBS-LRR	AT5G48770	AT5G48770.1	TIR,PF01582.21,NB-ARC,PF00931.23,TIR_2,PF13676.7,LRR_8,PF13855.7,LRR_4,PF12799.8,LRR_3,PF07725.13	'No_CC'	Disease resistance protein (TIR-NBS-LRR class) family
TIR-NBS	AT5G48780	AT5G48780.1	TIR,PF01582.21,NB-ARC,PF00931.23,TIR_2,PF13676.7,NACHT,PF05729.13,ATPase_2,PF01637.19,AAA_14,PF13173.7,AAA_16,PF13191.7,AAA_22,PF13401.7	'No_CC'	Disease resistance protein (TIR-NBS class)
TIR-NBS-LRR	AT5G49140	AT5G49140.1	TIR,PF01582.21,NB-ARC,PF00931.23,LRR_4,PF12799.8,TIR_2,PF13676.7,LRR_3,PF07725.13	'No_CC'	Disease resistance protein (TIR-NBS-LRR class) family
TIR-NBS-LRR	AT5G51630	AT5G51630.1	TIR,PF01582.21,NB-ARC,PF00931.23,LRR_3,PF07725.13,TIR_2,PF13676.7,LRR_4,PF12799.8	'No_CC'	Disease resistance protein (TIR-NBS-LRR class) family
NBS	AT5G56220	AT5G56220.2	NB-ARC,PF00931.23	'No_CC'	P-loop containing nucleoside triphosphate hydrolases superfamily protein
TIR-NBS-LRR	AT5G58120	AT5G58120.1	TIR,PF01582.21,NB-ARC,PF00931.23,TIR_2,PF13676.7,LRR_3,PF07725.13,LRR_8,PF13855.7,LRR_4,PF12799.8	'No_CC'	Disease resistance protein (TIR-NBS-LRR class) family
CC-NBS-LRR	AT5G63020	AT5G63020.1	NB-ARC,PF00931.23,LRR_8,PF13855.7	'CC_region'	Probable disease resistance protein At5g63020
NBS	AT5G66630	AT5G66630.1	DA1-like,PF12315.9,RPW8,PF05659.12,NB-ARC,PF00931.23,LIM,PF00412.23	'No_CC'	Protein DA1-related 5
CC-NBS-LRR	AT5G66900	AT5G66900.2	RPW8,PF05659.12,NB-ARC,PF00931.23,LRR_4,PF12799.8,LRR_8,PF13855.7	'CC_region'	Disease resistance protein (CC-NBS-LRR class) family
NBS-LRR	AT5G66910	AT5G66910.1	RPW8,PF05659.12,NB-ARC,PF00931.23,LRR_4,PF12799.8,AAA_16,PF13191.7	'No_CC'	Probable disease resistance protein At5g66910

## Sheet: Populus trichocarpa
Class	Gene_id	protein_id	NBS_domain/ids	CC_domain_Predicted	Descript
NBS-LRR	Potri.001G025400	Potri.001G025400.1.p	NB-ARC,PF00931.23,Rx_N,PF18052.2,LRR_4,PF12799.8,LRR_8,PF13855.7	'No_CC'	NB-ARC domain-containing disease resistance protein
TIR-NBS	Potri.001G028700	Potri.001G028700.1.p	TIR,PF01582.21,NB-ARC,PF00931.23,TIR_2,PF13676.7,AAA_22,PF13401.7	'No_CC'	Disease resistance protein (TIR-NBS-LRR class) family
CC-NBS-LRR	Potri.001G029300	Potri.001G029300.2.p	NB-ARC,PF00931.23,Rx_N,PF18052.2,LRR_8,PF13855.7,LRR_4,PF12799.8	'CC_region'	LRR and NB-ARC domains-containing disease resistance protein
NBS	Potri.001G033100	Potri.001G033100.1.p	NB-ARC,PF00931.23,Rx_N,PF18052.2	'No_CC'	NB-ARC domain-containing disease resistance protein
NBS-LRR	Potri.001G066500	Potri.001G066500.3.p	NB-ARC,PF00931.23,LRR_8,PF13855.7,LRR_4,PF12799.8	'No_CC'	Disease resistance protein (TIR-NBS-LRR class) family
NBS-LRR	Potri.001G134300	Potri.001G134300.2.p	NB-ARC,PF00931.23,LRR_8,PF13855.7	'No_CC'	NB-ARC domain-containing disease resistance protein
NBS	Potri.001G134400	Potri.001G134400.1.p	NB-ARC,PF00931.23,Rx_N,PF18052.2	'No_CC'	NB-ARC domain-containing disease resistance protein
NBS	Potri.001G134500	Potri.001G134500.2.p	NB-ARC,PF00931.23,Rx_N,PF18052.2,AAA_16,PF13191.7	'No_CC'	NB-ARC domain-containing disease resistance protein
NBS	Potri.001G134700	Potri.001G134700.1.p	NB-ARC,PF00931.23,Rx_N,PF18052.2	'No_CC'	NB-ARC domain-containing disease resistance protein
NBS	Potri.001G172300	Potri.001G172300.1.p	NB-ARC,PF00931.23	'No_CC'	LRR and NB-ARC domains-containing disease resistance protein
NBS-LRR	Potri.001G261300	Potri.001G261300.1.p	NB-ARC,PF00931.23,Rx_N,PF18052.2,LRR_4,PF12799.8,LRR_8,PF13855.7	'No_CC'	LRR and NB-ARC domains-containing disease resistance protein
NBS	Potri.001G261500	Potri.001G261500.1.p	NB-ARC,PF00931.23	'No_CC'	NB-ARC domain-containing disease resistance protein
NBS-LRR	Potri.001G261600	Potri.001G261600.2.p	NB-ARC,PF00931.23,Rx_N,PF18052.2,LRR_4,PF12799.8,LRR_8,PF13855.7	'No_CC'	NB-ARC domain-containing disease resistance protein
TIR-NBS	Potri.001G307300	Potri.001G307300.2.p	TIR,PF01582.21,NB-ARC,PF00931.23,TIR_2,PF13676.7,DUF1635,PF07795.12	'No_CC'	disease resistance protein (TIR-NBS-LRR class), putative
TIR-NBS	Potri.001G363340	Potri.001G363340.1.p	NB-ARC,PF00931.23,TIR,PF01582.21,AAA_16,PF13191.7	'No_CC'	transmembrane receptors;ATP binding
TIR-NBS	Potri.001G363400	Potri.001G363400.1.p	TIR,PF01582.21,NB-ARC,PF00931.23,TIR_2,PF13676.7	'No_CC'	Disease resistance protein (TIR-NBS-LRR class) family
NBS	Potri.001G363700	Potri.001G363700.1.p	NB-ARC,PF00931.23	'No_CC'	NB-ARC domain-containing disease resistance protein
NBS	Potri.001G364700	Potri.001G364700.1.p	NB-ARC,PF00931.23	'No_CC'	NB-ARC domain-containing disease resistance protein
NBS-LRR	Potri.001G379700	Potri.001G379700.1.p	NB-ARC,PF00931.23,Rx_N,PF18052.2,LRR_4,PF12799.8,LRR_8,PF13855.7	'No_CC'	NB-ARC domain-containing disease resistance protein
NBS-LRR	Potri.001G404800	Potri.001G404800.3.p	NB-ARC,PF00931.23,LRR_8,PF13855.7,LRR_4,PF12799.8	'No_CC'	LRR and NB-ARC domains-containing disease resistance protein
NBS-LRR	Potri.001G404875	Potri.001G404875.1.p	LRR_8,PF13855.7,LRR_4,PF12799.8	'No_CC'	NB-ARC domain-containing disease resistance protein
NBS	Potri.001G405025	Potri.001G405025.1.p	NB-ARC,PF00931.23	'No_CC'	LRR and NB-ARC domains-containing disease resistance protein
NBS-LRR	Potri.001G405100	Potri.001G405100.3.p	NB-ARC,PF00931.23,LRR_8,PF13855.7,LRR_4,PF12799.8	'No_CC'	LRR and NB-ARC domains-containing disease resistance protein
NBS-LRR	Potri.001G406000	Potri.001G406000.2.p	NB-ARC,PF00931.23,LRR_8,PF13855.7	'No_CC'	NB-ARC domain-containing disease resistance protein
CC-NBS	Potri.001G406100	Potri.001G406100.2.p	NB-ARC,PF00931.23,NACHT,PF05729.13	'CC_region'	LRR and NB-ARC domains-containing disease resistance protein
CC-NBS-LRR	Potri.001G416900	Potri.001G416900.1.p	NB-ARC,PF00931.23,LRR_4,PF12799.8,LRR_8,PF13855.7	'CC_region'	NB-ARC domain-containing disease resistance protein
NBS	Potri.001G419800	Potri.001G419800.1.p	NB-ARC,PF00931.23	'No_CC'	NB-ARC domain-containing disease resistance protein
NBS-LRR	Potri.001G420000	Potri.001G420000.1.p	NB-ARC,PF00931.23,LRR_4,PF12799.8	'No_CC'	NB-ARC domain-containing disease resistance protein
CC-NBS-LRR	Potri.001G422800	Potri.001G422800.15.p	NB-ARC,PF00931.23,LRR_4,PF12799.8	'CC_region'	NB-ARC domain-containing disease resistance protein
CC-NBS	Potri.001G425300	Potri.001G425300.1.p	NB-ARC,PF00931.23	'CC_region'	NB-ARC domain-containing disease resistance protein
CC-NBS	Potri.001G425950	Potri.001G425950.1.p	NB-ARC,PF00931.23	'CC_region'	LRR and NB-ARC domains-containing disease resistance protein
CC-NBS	Potri.001G426200	Potri.001G426200.1.p	NB-ARC,PF00931.23	'CC_region'	NB-ARC domain-containing disease resistance protein
CC-NBS	Potri.001G426632	Potri.001G426632.1.p	NB-ARC,PF00931.23	'CC_region'	NB-ARC domain-containing disease resistance protein
NBS	Potri.001G427100	Potri.001G427100.1.p	NB-ARC,PF00931.23	'No_CC'	NB-ARC domain-containing disease resistance protein
NBS	Potri.001G427500	Potri.001G427500.3.p	NB-ARC,PF00931.23	'No_CC'	NB-ARC domain-containing disease resistance protein
CC-NBS	Potri.001G427600	Potri.001G427600.1.p	NB-ARC,PF00931.23	'CC_region'	NB-ARC domain-containing disease resistance protein
CC-NBS	Potri.001G427700	Potri.001G427700.3.p	NB-ARC,PF00931.23	'CC_region'	NB-ARC domain-containing disease resistance protein
CC-NBS-LRR	Potri.001G428100	Potri.001G428100.3.p	NB-ARC,PF00931.23,LRR_4,PF12799.8	'CC_region'	NB-ARC domain-containing disease resistance protein
CC-NBS	Potri.001G428700	Potri.001G428700.1.p	NB-ARC,PF00931.23	'CC_region'	NB-ARC domain-containing disease resistance protein
NBS	Potri.001G429101	Potri.001G429101.1.p	NB-ARC,PF00931.23	'No_CC'	NB-ARC domain-containing disease resistance protein
CC-NBS	Potri.001G429600	Potri.001G429600.2.p	NB-ARC,PF00931.23	'CC_region'	NB-ARC domain-containing disease resistance protein
CC-NBS	Potri.001G429700	Potri.001G429700.1.p	NB-ARC,PF00931.23	'CC_region'	NB-ARC domain-containing disease resistance protein
CC-NBS-LRR	Potri.001G429800	Potri.001G429800.3.p	NB-ARC,PF00931.23,LRR_4,PF12799.8	'CC_region'	NB-ARC domain-containing disease resistance protein
NBS	Potri.001G432200	Potri.001G432200.2.p	NB-ARC,PF00931.23	'No_CC'	NB-ARC domain-containing disease resistance protein
NBS	Potri.001G432300	Potri.001G432300.1.p	NB-ARC,PF00931.23	'No_CC'	NB-ARC domain-containing disease resistance protein
CC-NBS	Potri.001G432366	Potri.001G432366.1.p	NB-ARC,PF00931.23	'CC_region'	NB-ARC domain-containing disease resistance protein
CC-NBS-LRR	Potri.001G432800	Potri.001G432800.1.p	NB-ARC,PF00931.23,LRR_4,PF12799.8	'CC_region'	NB-ARC domain-containing disease resistance protein
NBS	Potri.001G433700	Potri.001G433700.1.p	NB-ARC,PF00931.23	'No_CC'	NB-ARC domain-containing disease resistance protein
CC-NBS-LRR	Potri.001G434000	Potri.001G434000.5.p	NB-ARC,PF00931.23,LRR_4,PF12799.8	'CC_region'	NB-ARC domain-containing disease resistance protein
CC-NBS	Potri.001G434700	Potri.001G434700.1.p	NB-ARC,PF00931.23	'CC_region'	NB-ARC domain-containing disease resistance protein
CC-NBS	Potri.001G435100	Potri.001G435100.1.p	NB-ARC,PF00931.23,AAA_16,PF13191.7,AAA_22,PF13401.7	'CC_region'	NB-ARC domain-containing disease resistance protein
CC-NBS-LRR	Potri.001G443400	Potri.001G443400.2.p	NB-ARC,PF00931.23,LRR_4,PF12799.8	'CC_region'	NB-ARC domain-containing disease resistance protein
NBS	Potri.001G443700	Potri.001G443700.2.p	NB-ARC,PF00931.23	'No_CC'	NB-ARC domain-containing disease resistance protein
NBS	Potri.001G443932	Potri.001G443932.1.p	NB-ARC,PF00931.23	'No_CC'	RPS5-like 1
CC-NBS	Potri.001G444000	Potri.001G444000.4.p	NB-ARC,PF00931.23	'CC_region'	NB-ARC domain-containing disease resistance protein
NBS	Potri.001G444100	Potri.001G444100.3.p	NB-ARC,PF00931.23	'No_CC'	NB-ARC domain-containing disease resistance protein
CC-NBS-LRR	Potri.001G444500	Potri.001G444500.2.p	NB-ARC,PF00931.23,LRR_8,PF13855.7	'CC_region'	NB-ARC domain-containing disease resistance protein
NBS	Potri.001G444600	Potri.001G444600.2.p	NB-ARC,PF00931.23	'No_CC'	LRR and NB-ARC domains-containing disease resistance protein
CC-NBS	Potri.001G445000	Potri.001G445000.1.p	NB-ARC,PF00931.23	'CC_region'	NB-ARC domain-containing disease resistance protein
CC-NBS	Potri.001G445200	Potri.001G445200.2.p	NB-ARC,PF00931.23	'CC_region'	NB-ARC domain-containing disease resistance protein
NBS-LRR	Potri.001G445300	Potri.001G445300.1.p	LRR_4,PF12799.8	'No_CC'	NB-ARC domain-containing disease resistance protein
NBS-LRR	Potri.001G445600	Potri.001G445600.1.p	NB-ARC,PF00931.23,LRR_4,PF12799.8	'No_CC'	NB-ARC domain-containing disease resistance protein
CC-NBS	Potri.001G445700	Potri.001G445700.1.p	NB-ARC,PF00931.23	'CC_region'	NB-ARC domain-containing disease resistance protein
NBS	Potri.001G445900	Potri.001G445900.1.p	NB-ARC,PF00931.23	'No_CC'	NB-ARC domain-containing disease resistance protein
NBS	Potri.001G446300	Potri.001G446300.2.p	NB-ARC,PF00931.23	'No_CC'	NB-ARC domain-containing disease resistance protein
NBS	Potri.001G446650	Potri.001G446650.1.p	NB-ARC,PF00931.23	'No_CC'	NB-ARC domain-containing disease resistance protein
NBS	Potri.001G446966	Potri.001G446966.1.p	NB-ARC,PF00931.23	'No_CC'	NB-ARC domain-containing disease resistance protein
CC-NBS-LRR	Potri.001G447132	Potri.001G447132.1.p	NB-ARC,PF00931.23,LRR_4,PF12799.8	'CC_region'	NB-ARC domain-containing disease resistance protein
NBS	Potri.001G468600	Potri.001G468600.1.p	NB-ARC,PF00931.23	'No_CC'	--
TIR-NBS	Potri.002G056050	Potri.002G056050.1.p	TIR,PF01582.21,NB-ARC,PF00931.23,TIR_2,PF13676.7	'No_CC'	Disease resistance protein (TIR-NBS-LRR class) family
NBS	Potri.002G129300	Potri.002G129300.1.p	NB-ARC,PF00931.23,RPW8,PF05659.12	'No_CC'	ADR1-like 1
CC-NBS-LRR	Potri.002G216800	Potri.002G216800.1.p	NB-ARC,PF00931.23,Rx_N,PF18052.2,LRR_8,PF13855.7	'CC_region'	NB-ARC domain-containing disease resistance protein
NBS	Potri.003G012900	Potri.003G012900.1.p	NB-ARC,PF00931.23	'No_CC'	NB-ARC domain-containing disease resistance protein
TIR-NBS-LRR	Potri.003G014200	Potri.003G014200.1.p	TIR,PF01582.21,NB-ARC,PF00931.23,TIR_2,PF13676.7,LRR_8,PF13855.7,LRR_4,PF12799.8	'No_CC'	Disease resistance protein (TIR-NBS-LRR class) family
NBS-LRR	Potri.003G015500	Potri.003G015500.2.p	NB-ARC,PF00931.23,Rx_N,PF18052.2,LRR_4,PF12799.8,LRR_8,PF13855.7	'No_CC'	LRR and NB-ARC domains-containing disease resistance protein
NBS-LRR	Potri.003G017200	Potri.003G017200.1.p	NB-ARC,PF00931.23,Rx_N,PF18052.2,LRR_4,PF12799.8,LRR_8,PF13855.7	'No_CC'	LRR and NB-ARC domains-containing disease resistance protein
NBS-LRR	Potri.003G026900	Potri.003G026900.1.p	NB-ARC,PF00931.23,Rx_N,PF18052.2,LRR_4,PF12799.8,LRR_8,PF13855.7	'No_CC'	LRR and NB-ARC domains-containing disease resistance protein
NBS-LRR	Potri.003G055600	Potri.003G055600.2.p	NB-ARC,PF00931.23,LRR_4,PF12799.8	'No_CC'	LRR and NB-ARC domains-containing disease resistance protein
NBS	Potri.003G062100	Potri.003G062100.1.p	NB-ARC,PF00931.23	'No_CC'	Disease resistance protein (CC-NBS-LRR class) family
TIR-NBS-LRR	Potri.003G084200	Potri.003G084200.1.p	TIR,PF01582.21,NB-ARC,PF00931.23,EF-hand_1,PF00036.33,TIR_2,PF13676.7,LRR_8,PF13855.7,EF-hand_6,PF13405.7,EF-hand_7,PF13499.7,LRR_4,PF12799.8,EF-hand_5,PF13202.7	'No_CC'	transmembrane receptors;ATP binding
NBS	Potri.003G099000	Potri.003G099000.1.p	NB-ARC,PF00931.23,Rx_N,PF18052.2	'No_CC'	NB-ARC domain-containing disease resistance protein
NBS	Potri.003G099100	Potri.003G099100.2.p	NB-ARC,PF00931.23,Rx_N,PF18052.2	'No_CC'	NB-ARC domain-containing disease resistance protein
NBS	Potri.003G099200	Potri.003G099200.1.p	Rx_N,PF18052.2,NB-ARC,PF00931.23	'No_CC'	LRR and NB-ARC domains-containing disease resistance protein
NBS-LRR	Potri.003G101000	Potri.003G101000.1.p	LRR_4,PF12799.8,LRR_8,PF13855.7,NB-ARC,PF00931.23	'No_CC'	NB-ARC domain-containing disease resistance protein
NBS-LRR	Potri.003G149800	Potri.003G149800.1.p	NB-ARC,PF00931.23,Rx_N,PF18052.2,LRR_4,PF12799.8,LRR_8,PF13855.7	'No_CC'	Disease resistance protein (CC-NBS-LRR class) family
NBS-LRR	Potri.003G150200	Potri.003G150200.1.p	NB-ARC,PF00931.23,Rx_N,PF18052.2,LRR_8,PF13855.7	'No_CC'	Disease resistance protein (CC-NBS-LRR class) family
TIR-NBS-LRR	Potri.003G198900	Potri.003G198900.1.p	TIR,PF01582.21,NB-ARC,PF00931.23,LRR_4,PF12799.8,TIR_2,PF13676.7,Rx_N,PF18052.2,LRR_8,PF13855.7	'No_CC'	LRR and NB-ARC domains-containing disease resistance protein
TIR-NBS-LRR	Potri.003G199100	Potri.003G199100.1.p	NB-ARC,PF00931.23,TIR,PF01582.21,TIR_2,PF13676.7,Rx_N,PF18052.2,LRR_4,PF12799.8,LRR_8,PF13855.7,AAA_16,PF13191.7	'No_CC'	LRR and NB-ARC domains-containing disease resistance protein
TIR-NBS-LRR	Potri.003G199400	Potri.003G199400.3.p	NB-ARC,PF00931.23,TIR,PF01582.21,Rx_N,PF18052.2,TIR_2,PF13676.7,LRR_4,PF12799.8,AAA_16,PF13191.7,LRR_8,PF13855.7	'CC_region'	NB-ARC domain-containing disease resistance protein
NBS-LRR	Potri.003G199500	Potri.003G199500.1.p	NB-ARC,PF00931.23,LRR_4,PF12799.8	'No_CC'	NB-ARC domain-containing disease resistance protein
NBS-LRR	Potri.003G199575	Potri.003G199575.1.p	NB-ARC,PF00931.23,Rx_N,PF18052.2,LRR_8,PF13855.7,LRR_4,PF12799.8,AAA_16,PF13191.7	'No_CC'	NB-ARC domain-containing disease resistance protein
CC-NBS	Potri.003G200040	Potri.003G200040.1.p	NB-ARC,PF00931.23,Rx_N,PF18052.2	'CC_region'	NB-ARC domain-containing disease resistance protein
NBS-LRR	Potri.003G200200	Potri.003G200200.1.p	NB-ARC,PF00931.23,LRR_4,PF12799.8,LRR_8,PF13855.7,AAA_16,PF13191.7	'No_CC'	NB-ARC domain-containing disease resistance protein
TIR-NBS-LRR	Potri.003G200500	Potri.003G200500.2.p	NB-ARC,PF00931.23,TIR,PF01582.21,Rx_N,PF18052.2,TIR_2,PF13676.7,LRR_4,PF12799.8,LRR_8,PF13855.7	'No_CC'	LRR and NB-ARC domains-containing disease resistance protein
CC-NBS-LRR	Potri.003G200800	Potri.003G200800.1.p	NB-ARC,PF00931.23,Rx_N,PF18052.2,LRR_4,PF12799.8,LRR_8,PF13855.7	'CC_region'	LRR and NB-ARC domains-containing disease resistance protein
CC-NBS-LRR	Potri.003G201800	Potri.003G201800.1.p	NB-ARC,PF00931.23,Rx_N,PF18052.2,LRR_4,PF12799.8,LRR_8,PF13855.7	'CC_region'	NB-ARC domain-containing disease resistance protein
NBS-LRR	Potri.003G201900	Potri.003G201900.1.p	NB-ARC,PF00931.23,Rx_N,PF18052.2,LRR_4,PF12799.8	'No_CC'	NB-ARC domain-containing disease resistance protein
NBS	Potri.003G220600	Potri.003G220600.1.p	NB-ARC,PF00931.23,Rx_N,PF18052.2	'No_CC'	NB-ARC domain-containing disease resistance protein
CC-NBS	Potri.004G076700	Potri.004G076700.1.p	NB-ARC,PF00931.23,Rx_N,PF18052.2	'CC_region'	NB-ARC domain-containing disease resistance protein
NBS	Potri.004G077200	Potri.004G077200.1.p	NB-ARC,PF00931.23	'No_CC'	NB-ARC domain-containing disease resistance protein
NBS	Potri.004G087800	Potri.004G087800.1.p	Rx_N,PF18052.2,NB-ARC,PF00931.23	'No_CC'	NB-ARC domain-containing disease resistance protein
TIR-NBS-LRR	Potri.004G088500	Potri.004G088500.2.p	TIR,PF01582.21,NB-ARC,PF00931.23,LRR_8,PF13855.7,LRR_4,PF12799.8,TIR_2,PF13676.7,ZapA,PF05164.14,KHA,PF11834.9	'No_CC'	disease resistance protein (TIR-NBS-LRR class)
NBS-LRR	Potri.004G169800	Potri.004G169800.1.p	NB-ARC,PF00931.23,Rx_N,PF18052.2,LRR_4,PF12799.8,LRR_8,PF13855.7	'No_CC'	LRR and NB-ARC domains-containing disease resistance protein
NBS-LRR	Potri.004G170100	Potri.004G170100.1.p	NB-ARC,PF00931.23,LRR_4,PF12799.8	'No_CC'	LRR and NB-ARC domains-containing disease resistance protein
NBS	Potri.004G170166	Potri.004G170166.1.p	NB-ARC,PF00931.23,Rx_N,PF18052.2	'No_CC'	NB-ARC domain-containing disease resistance protein
NBS-LRR	Potri.004G170300	Potri.004G170300.2.p	NB-ARC,PF00931.23,Rx_N,PF18052.2,LRR_4,PF12799.8,LRR_8,PF13855.7	'No_CC'	NB-ARC domain-containing disease resistance protein
NBS-LRR	Potri.004G170400	Potri.004G170400.1.p	NB-ARC,PF00931.23,Rx_N,PF18052.2,LRR_4,PF12799.8,LRR_8,PF13855.7	'No_CC'	NB-ARC domain-containing disease resistance protein
NBS-LRR	Potri.004G170700	Potri.004G170700.1.p	NB-ARC,PF00931.23,Rx_N,PF18052.2,LRR_4,PF12799.8,LRR_8,PF13855.7	'No_CC'	NB-ARC domain-containing disease resistance protein
NBS-LRR	Potri.004G194800	Potri.004G194800.3.p	LRR_4,PF12799.8,LRR_8,PF13855.7	'No_CC'	LRR and NB-ARC domains-containing disease resistance protein
CC-NBS	Potri.004G194850	Potri.004G194850.1.p	NB-ARC,PF00931.23,Rx_N,PF18052.2	'CC_region'	NB-ARC domain-containing disease resistance protein
NBS-LRR	Potri.004G195200	Potri.004G195200.2.p	NB-ARC,PF00931.23,LRR_4,PF12799.8,LRR_8,PF13855.7	'No_CC'	NB-ARC domain-containing disease resistance protein
NBS-LRR	Potri.004G196100	Potri.004G196100.1.p	NB-ARC,PF00931.23,Rx_N,PF18052.2,LRR_4,PF12799.8,LRR_8,PF13855.7	'No_CC'	NB-ARC domain-containing disease resistance protein
NBS-LRR	Potri.004G197800	Potri.004G197800.1.p	NB-ARC,PF00931.23,LRR_8,PF13855.7	'No_CC'	NB-ARC domain-containing disease resistance protein
NBS-LRR	Potri.004G197900	Potri.004G197900.1.p	NB-ARC,PF00931.23,Rx_N,PF18052.2,LRR_8,PF13855.7	'No_CC'	NB-ARC domain-containing disease resistance protein
NBS-LRR	Potri.004G198700	Potri.004G198700.1.p	NB-ARC,PF00931.23,Rx_N,PF18052.2,LRR_8,PF13855.7,LRR_4,PF12799.8	'No_CC'	LRR and NB-ARC domains-containing disease resistance protein
NBS-LRR	Potri.004G202700	Potri.004G202700.1.p	NB-ARC,PF00931.23,Rx_N,PF18052.2,LRR_4,PF12799.8,LRR_8,PF13855.7	'No_CC'	NB-ARC domain-containing disease resistance protein
NBS-LRR	Potri.005G007001	Potri.005G007001.1.p	NB-ARC,PF00931.23,Rx_N,PF18052.2,LRR_8,PF13855.7,LRR_4,PF12799.8	'No_CC'	NB-ARC domain-containing disease resistance protein
NBS	Potri.005G007800	Potri.005G007800.1.p	NB-ARC,PF00931.23	'No_CC'	NB-ARC domain-containing disease resistance protein
NBS	Potri.005G008000	Potri.005G008000.1.p	NB-ARC,PF00931.23,Rx_N,PF18052.2	'No_CC'	NB-ARC domain-containing disease resistance protein
NBS	Potri.005G008700	Potri.005G008700.1.p	NB-ARC,PF00931.23,Rx_N,PF18052.2	'No_CC'	NB-ARC domain-containing disease resistance protein
NBS	Potri.005G009100	Potri.005G009100.1.p	NB-ARC,PF00931.23,Rx_N,PF18052.2	'No_CC'	Disease resistance protein (CC-NBS-LRR class) family
NBS	Potri.005G009600	Potri.005G009600.1.p	NB-ARC,PF00931.23	'No_CC'	NB-ARC domain-containing disease resistance protein
NBS	Potri.005G009900	Potri.005G009900.1.p	NB-ARC,PF00931.23,Rx_N,PF18052.2	'No_CC'	NB-ARC domain-containing disease resistance protein
NBS	Potri.005G010450	Potri.005G010450.1.p	NB-ARC,PF00931.23,Rx_N,PF18052.2	'No_CC'	NB-ARC domain-containing disease resistance protein
TIR-NBS-LRR	Potri.005G030700	Potri.005G030700.2.p	TIR,PF01582.21,LRR_4,PF12799.8,NB-ARC,PF00931.23,LRR_8,PF13855.7,TIR_2,PF13676.7	'No_CC'	disease resistance protein (TIR-NBS-LRR class)
NBS-LRR	Potri.005G031200	Potri.005G031200.2.p	NB-ARC,PF00931.23,LRR_4,PF12799.8	'No_CC'	disease resistance protein (TIR-NBS-LRR class), putative
TIR-NBS-LRR	Potri.005G031600	Potri.005G031600.1.p	TIR,PF01582.21,NB-ARC,PF00931.23,TIR_2,PF13676.7,LRR_4,PF12799.8,LRR_8,PF13855.7	'No_CC'	Disease resistance protein (TIR-NBS-LRR class) family
NBS-LRR	Potri.005G031900	Potri.005G031900.1.p	LRR_4,PF12799.8,NB-ARC,PF00931.23,LRR_8,PF13855.7,KRE1,PF17056.6	'No_CC'	disease resistance protein (TIR-NBS-LRR class)
NBS-LRR	Potri.005G034701	Potri.005G034701.1.p	LRR_8,PF13855.7	'No_CC'	NB-ARC domain-containing disease resistance protein
NBS-LRR	Potri.005G034900	Potri.005G034900.1.p	NB-ARC,PF00931.23,Rx_N,PF18052.2,LRR_8,PF13855.7	'No_CC'	NB-ARC domain-containing disease resistance protein
NBS-LRR	Potri.005G035400	Potri.005G035400.2.p	NB-ARC,PF00931.23,Rx_N,PF18052.2,LRR_8,PF13855.7,AAA_22,PF13401.7,AAA_14,PF13173.7	'No_CC'	NB-ARC domain-containing disease resistance protein
CC-NBS-LRR	Potri.005G035700	Potri.005G035700.1.p	NB-ARC,PF00931.23,Rx_N,PF18052.2,LRR_4,PF12799.8,LRR_8,PF13855.7	'CC_region'	NB-ARC domain-containing disease resistance protein
CC-NBS-LRR	Potri.005G041101	Potri.005G041101.1.p	NB-ARC,PF00931.23,LRR_8,PF13855.7,AAA_16,PF13191.7	'CC_region'	NB-ARC domain-containing disease resistance protein
CC-NBS	Potri.005G041300	Potri.005G041300.1.p	NB-ARC,PF00931.23,AAA_16,PF13191.7	'CC_region'	NB-ARC domain-containing disease resistance protein
CC-NBS	Potri.005G042400	Potri.005G042400.1.p	NB-ARC,PF00931.23,AAA_16,PF13191.7	'CC_region'	NB-ARC domain-containing disease resistance protein
NBS	Potri.005G042900	Potri.005G042900.2.p	NB-ARC,PF00931.23,AAA_16,PF13191.7	'No_CC'	NB-ARC domain-containing disease resistance protein
CC-NBS	Potri.005G061860	Potri.005G061860.1.p	NB-ARC,PF00931.23,NACHT,PF05729.13,AAA_16,PF13191.7	'CC_region'	NB-ARC domain-containing disease resistance protein
CC-NBS-LRR	Potri.005G062201	Potri.005G062201.1.p	NB-ARC,PF00931.23,NACHT,PF05729.13,AAA_16,PF13191.7,LRR_8,PF13855.7	'CC_region'	NB-ARC domain-containing disease resistance protein
NBS	Potri.005G062600	Potri.005G062600.1.p	NB-ARC,PF00931.23	'No_CC'	disease resistance protein (TIR-NBS-LRR class), putative
CC-NBS	Potri.005G119800	Potri.005G119800.1.p	NB-ARC,PF00931.23,Rx_N,PF18052.2	'CC_region'	HOPZ-ACTIVATED RESISTANCE 1
TIR-NBS-LRR	Potri.005G206400	Potri.005G206400.1.p	TIR,PF01582.21,NB-ARC,PF00931.23,TIR_2,PF13676.7,LRR_8,PF13855.7,LRR_4,PF12799.8,NACHT,PF05729.13	'No_CC'	Disease resistance protein (TIR-NBS-LRR class) family
NBS-LRR	Potri.006G014400	Potri.006G014400.1.p	NB-ARC,PF00931.23,Rx_N,PF18052.2,LRR_4,PF12799.8	'No_CC'	HOPZ-ACTIVATED RESISTANCE 1
NBS-LRR	Potri.006G147100	Potri.006G147100.1.p	NB-ARC,PF00931.23,LRR_4,PF12799.8,LRR_8,PF13855.7	'No_CC'	NB-ARC domain-containing disease resistance protein
NBS-LRR	Potri.006G269900	Potri.006G269900.2.p	LRR_8,PF13855.7,NB-ARC,PF00931.23	'No_CC'	Disease resistance protein (TIR-NBS-LRR class) family
TIR-NBS-LRR	Potri.006G270000	Potri.006G270000.1.p	TIR,PF01582.21,NB-ARC,PF00931.23,TIR_2,PF13676.7,LRR_8,PF13855.7	'No_CC'	Disease resistance protein (TIR-NBS-LRR class) family
CC-NBS	Potri.006G271640	Potri.006G271640.1.p	NB-ARC,PF00931.23,Rx_N,PF18052.2	'CC_region'	NB-ARC domain-containing disease resistance protein
CC-NBS-LRR	Potri.006G271800	Potri.006G271800.2.p	NB-ARC,PF00931.23,Rx_N,PF18052.2,LRR_4,PF12799.8,LRR_8,PF13855.7	'CC_region'	NB-ARC domain-containing disease resistance protein
NBS	Potri.006G273200	Potri.006G273200.2.p	NB-ARC,PF00931.23,NACHT,PF05729.13	'No_CC'	NB-ARC domain-containing disease resistance protein
CC-NBS-LRR	Potri.006G273900	Potri.006G273900.1.p	NB-ARC,PF00931.23,Rx_N,PF18052.2,LRR_4,PF12799.8,LRR_8,PF13855.7	'CC_region'	NB-ARC domain-containing disease resistance protein
NBS-LRR	Potri.006G273966	Potri.006G273966.1.p	LRR_4,PF12799.8,LRR_8,PF13855.7	'No_CC'	NB-ARC domain-containing disease resistance protein
CC-NBS	Potri.006G274032	Potri.006G274032.1.p	NB-ARC,PF00931.23,Rx_N,PF18052.2	'CC_region'	NB-ARC domain-containing disease resistance protein
CC-NBS-LRR	Potri.006G274400	Potri.006G274400.1.p	NB-ARC,PF00931.23,Rx_N,PF18052.2,LRR_4,PF12799.8	'CC_region'	NB-ARC domain-containing disease resistance protein
CC-NBS-LRR	Potri.006G275800	Potri.006G275800.2.p	NB-ARC,PF00931.23,Rx_N,PF18052.2,LRR_4,PF12799.8,LRR_8,PF13855.7,AAA_22,PF13401.7	'CC_region'	NB-ARC domain-containing disease resistance protein
NBS	Potri.007G039000	Potri.007G039000.1.p	RPW8,PF05659.12,NB-ARC,PF00931.23	'No_CC'	Disease resistance protein (CC-NBS-LRR class) family
NBS	Potri.007G039100	Potri.007G039100.1.p	RPW8,PF05659.12,NB-ARC,PF00931.23	'No_CC'	Disease resistance protein (CC-NBS-LRR class) family
NBS	Potri.007G039300	Potri.007G039300.1.p	RPW8,PF05659.12,NB-ARC,PF00931.23,AAA_22,PF13401.7,AAA_16,PF13191.7	'No_CC'	Disease resistance protein (CC-NBS-LRR class) family
NBS-LRR	Potri.007G099700	Potri.007G099700.3.p	NB-ARC,PF00931.23,LRR_8,PF13855.7,LRR_4,PF12799.8	'No_CC'	Disease resistance protein (TIR-NBS-LRR class) family
TIR-NBS	Potri.007G099750	Potri.007G099750.1.p	TIR,PF01582.21,TIR_2,PF13676.7,NB-ARC,PF00931.23	'No_CC'	Disease resistance protein (TIR-NBS-LRR class) family
CC-NBS-LRR	Potri.007G123200	Potri.007G123200.1.p	NB-ARC,PF00931.23,LRR_8,PF13855.7,AAA_16,PF13191.7	'CC_region'	NB-ARC domain-containing disease resistance protein
CC-NBS-LRR	Potri.007G137100	Potri.007G137100.2.p	NB-ARC,PF00931.23,Rx_N,PF18052.2,LRR_4,PF12799.8,AAA_16,PF13191.7	'CC_region'	LRR and NB-ARC domains-containing disease resistance protein
TIR-NBS	Potri.007G142500	Potri.007G142500.1.p	TIR,PF01582.21,TIR_2,PF13676.7,NB-ARC,PF00931.23,AAA_16,PF13191.7,NACHT,PF05729.13	'No_CC'	Disease resistance protein (TIR-NBS-LRR class) family
NBS-LRR	Potri.007G142600	Potri.007G142600.1.p	NB-ARC,PF00931.23,LRR_8,PF13855.7	'No_CC'	Disease resistance protein (TIR-NBS-LRR class) family
TIR-NBS	Potri.007G143100	Potri.007G143100.4.p	TIR,PF01582.21,TIR_2,PF13676.7,NB-ARC,PF00931.23	'No_CC'	Disease resistance protein (TIR-NBS-LRR class) family
TIR-NBS	Potri.007G143300	Potri.007G143300.1.p	TIR,PF01582.21,NB-ARC,PF00931.23,TIR_2,PF13676.7,NACHT,PF05729.13	'No_CC'	Disease resistance protein (TIR-NBS-LRR class) family
NBS-LRR	Potri.008G212200	Potri.008G212200.1.p	NB-ARC,PF00931.23,Rx_N,PF18052.2,LRR_8,PF13855.7,AAA_16,PF13191.7	'No_CC'	NB-ARC domain-containing disease resistance protein
TIR-NBS-LRR	Potri.008G220200	Potri.008G220200.2.p	TIR,PF01582.21,NB-ARC,PF00931.23,TIR_2,PF13676.7,LRR_4,PF12799.8,LRR_8,PF13855.7	'No_CC'	Disease resistance protein (TIR-NBS-LRR class) family
NBS	Potri.009G056200	Potri.009G056200.1.p	NB-ARC,PF00931.23	'No_CC'	NB-ARC domain-containing disease resistance protein
NBS-LRR	Potri.009G081000	Potri.009G081000.1.p	NB-ARC,PF00931.23,LRR_4,PF12799.8	'No_CC'	NB-ARC domain-containing disease resistance protein
NBS-LRR	Potri.011G005900	Potri.011G005900.1.p	NB-ARC,PF00931.23,Rx_N,PF18052.2,LRR_4,PF12799.8,LRR_8,PF13855.7	'No_CC'	LRR and NB-ARC domains-containing disease resistance protein
TIR-NBS-LRR	Potri.011G008600	Potri.011G008600.1.p	NB-ARC,PF00931.23,LRR_8,PF13855.7,TIR,PF01582.21	'No_CC'	transmembrane receptors;ATP binding
TIR-NBS-LRR	Potri.011G008700	Potri.011G008700.1.p	TIR,PF01582.21,NB-ARC,PF00931.23,TIR_2,PF13676.7,LRR_8,PF13855.7,LRR_4,PF12799.8	'No_CC'	transmembrane receptors;ATP binding
TIR-NBS-LRR	Potri.011G008800	Potri.011G008800.1.p	TIR,PF01582.21,NB-ARC,PF00931.23,TIR_2,PF13676.7,LRR_8,PF13855.7	'No_CC'	transmembrane receptors;ATP binding
TIR-NBS	Potri.011G009250	Potri.011G009250.1.p	TIR,PF01582.21,NB-ARC,PF00931.23,TIR_2,PF13676.7	'No_CC'	transmembrane receptors;ATP binding
TIR-NBS-LRR	Potri.011G009400	Potri.011G009400.3.p	TIR,PF01582.21,NB-ARC,PF00931.23,TIR_2,PF13676.7,LRR_8,PF13855.7,LRR_4,PF12799.8	'No_CC'	transmembrane receptors;ATP binding
TIR-NBS	Potri.011G011600	Potri.011G011600.2.p	TIR,PF01582.21,NB-ARC,PF00931.23,TIR_2,PF13676.7,AAA_16,PF13191.7	'No_CC'	transmembrane receptors;ATP binding
NBS	Potri.011G011900	Potri.011G011900.1.p	NB-ARC,PF00931.23	'No_CC'	Disease resistance protein (TIR-NBS-LRR class) family
TIR-NBS-LRR	Potri.011G012000	Potri.011G012000.1.p	TIR,PF01582.21,NB-ARC,PF00931.23,TIR_2,PF13676.7,LRR_8,PF13855.7	'No_CC'	Disease resistance protein (TIR-NBS-LRR class) family
TIR-NBS	Potri.011G012501	Potri.011G012501.1.p	TIR,PF01582.21,NB-ARC,PF00931.23,TIR_2,PF13676.7	'No_CC'	Disease resistance protein (TIR-NBS-LRR class) family
TIR-NBS	Potri.011G012900	Potri.011G012900.1.p	TIR,PF01582.21,NB-ARC,PF00931.23,ATPase_2,PF01637.19	'No_CC'	transmembrane receptors;ATP binding
TIR-NBS	Potri.011G012950	Potri.011G012950.1.p	TIR,PF01582.21,NB-ARC,PF00931.23,ATPase_2,PF01637.19,AAA_16,PF13191.7	'No_CC'	transmembrane receptors;ATP binding
NBS	Potri.011G013101	Potri.011G013101.1.p	NB-ARC,PF00931.23	'No_CC'	Disease resistance protein (TIR-NBS-LRR class) family
TIR-NBS-LRR	Potri.011G013201	Potri.011G013201.1.p	TIR,PF01582.21,NB-ARC,PF00931.23,TIR_2,PF13676.7,LRR_8,PF13855.7,LRR_4,PF12799.8	'No_CC'	transmembrane receptors;ATP binding
NBS-LRR	Potri.011G013401	Potri.011G013401.1.p	LRR_8,PF13855.7,NB-ARC,PF00931.23	'No_CC'	transmembrane receptors;ATP binding
TIR-NBS	Potri.011G013500	Potri.011G013500.1.p	TIR,PF01582.21,NB-ARC,PF00931.23	'No_CC'	transmembrane receptors;ATP binding
NBS-LRR	Potri.011G013701	Potri.011G013701.1.p	LRR_8,PF13855.7,NB-ARC,PF00931.23,LRR_4,PF12799.8	'No_CC'	transmembrane receptors;ATP binding
TIR-NBS	Potri.011G013800	Potri.011G013800.1.p	NB-ARC,PF00931.23,TIR,PF01582.21	'No_CC'	Disease resistance protein (TIR-NBS-LRR class) family
NBS-LRR	Potri.011G013900	Potri.011G013900.2.p	NB-ARC,PF00931.23,LRR_8,PF13855.7	'No_CC'	transmembrane receptors;ATP binding
TIR-NBS	Potri.011G014066	Potri.011G014066.1.p	TIR,PF01582.21,NB-ARC,PF00931.23,TIR_2,PF13676.7,AAA_16,PF13191.7	'No_CC'	Disease resistance protein (TIR-NBS-LRR class) family
TIR-NBS	Potri.011G014900	Potri.011G014900.1.p	TIR,PF01582.21,TIR_2,PF13676.7	'No_CC'	disease resistance protein (TIR-NBS-LRR class), putative
NBS	Potri.011G015300	Potri.011G015300.1.p	NB-ARC,PF00931.23,ATPase_2,PF01637.19	'No_CC'	Disease resistance protein (TIR-NBS-LRR class) family
TIR-NBS-LRR	Potri.011G015400	Potri.011G015400.3.p	TIR,PF01582.21,NB-ARC,PF00931.23,TIR_2,PF13676.7,LRR_8,PF13855.7	'No_CC'	transmembrane receptors;ATP binding
NBS	Potri.011G031400	Potri.011G031400.1.p	NB-ARC,PF00931.23,Rx_N,PF18052.2	'No_CC'	NB-ARC domain-containing disease resistance protein
NBS	Potri.011G040800	Potri.011G040800.1.p	NB-ARC,PF00931.23,AAA_22,PF13401.7	'No_CC'	P-loop containing nucleoside triphosphate hydrolases superfamily protein
TIR-NBS	Potri.011G060400	Potri.011G060400.1.p	TIR,PF01582.21,TIR_2,PF13676.7,NB-ARC,PF00931.23	'No_CC'	transmembrane receptors;ATP binding
TIR-NBS-LRR	Potri.011G060600	Potri.011G060600.2.p	TIR,PF01582.21,NB-ARC,PF00931.23,TIR_2,PF13676.7,LRR_8,PF13855.7	'No_CC'	transmembrane receptors;ATP binding
NBS-LRR	Potri.011G124000	Potri.011G124000.1.p	NB-ARC,PF00931.23,LRR_8,PF13855.7,LRR_4,PF12799.8,AAA_22,PF13401.7	'No_CC'	LRR and NB-ARC domains-containing disease resistance protein
NBS-LRR	Potri.011G124100	Potri.011G124100.1.p	NB-ARC,PF00931.23,LRR_8,PF13855.7,LRR_4,PF12799.8	'No_CC'	NB-ARC domain-containing disease resistance protein
NBS-LRR	Potri.011G124400	Potri.011G124400.1.p	NB-ARC,PF00931.23,LRR_8,PF13855.7,LRR_4,PF12799.8	'No_CC'	NB-ARC domain-containing disease resistance protein
NBS-LRR	Potri.011G127200	Potri.011G127200.2.p	NB-ARC,PF00931.23,LRR_8,PF13855.7,LRR_4,PF12799.8	'No_CC'	NB-ARC domain-containing disease resistance protein
NBS-LRR	Potri.011G127300	Potri.011G127300.1.p	NB-ARC,PF00931.23,LRR_8,PF13855.7	'No_CC'	NB-ARC domain-containing disease resistance protein
NBS-LRR	Potri.011G165700	Potri.011G165700.1.p	NB-ARC,PF00931.23,Rx_N,PF18052.2,LRR_4,PF12799.8,AAA_14,PF13173.7	'No_CC'	NB-ARC domain-containing disease resistance protein
NBS-LRR	Potri.012G032400	Potri.012G032400.1.p	NB-ARC,PF00931.23,Rx_N,PF18052.2,LRR_8,PF13855.7,LRR_4,PF12799.8	'No_CC'	NB-ARC domain-containing disease resistance protein
CC-NBS-LRR	Potri.012G048000	Potri.012G048000.1.p	NB-ARC,PF00931.23,Rx_N,PF18052.2,LRR_8,PF13855.7,LRR_4,PF12799.8	'CC_region'	NB-ARC domain-containing disease resistance protein
TIR-NBS-LRR	Potri.012G053200	Potri.012G053200.1.p	TIR,PF01582.21,NB-ARC,PF00931.23,LRR_8,PF13855.7,LRR_4,PF12799.8,TIR_2,PF13676.7,AAA_16,PF13191.7	'No_CC'	transmembrane receptors;ATP binding
NBS-LRR	Potri.012G121900	Potri.012G121900.1.p	NB-ARC,PF00931.23,Rx_N,PF18052.2,LRR_8,PF13855.7	'No_CC'	NB-ARC domain-containing disease resistance protein
NBS-LRR	Potri.012G122200	Potri.012G122200.1.p	NB-ARC,PF00931.23,Rx_N,PF18052.2,LRR_4,PF12799.8,LRR_8,PF13855.7	'No_CC'	NB-ARC domain-containing disease resistance protein
NBS-LRR	Potri.012G122301	Potri.012G122301.1.p	NB-ARC,PF00931.23,Rx_N,PF18052.2,LRR_4,PF12799.8,AAA_16,PF13191.7	'No_CC'	NB-ARC domain-containing disease resistance protein
NBS	Potri.012G122500	Potri.012G122500.1.p	NB-ARC,PF00931.23	'No_CC'	NB-ARC domain-containing disease resistance protein
NBS-LRR	Potri.012G122600	Potri.012G122600.1.p	NB-ARC,PF00931.23,Rx_N,PF18052.2,LRR_8,PF13855.7	'No_CC'	NB-ARC domain-containing disease resistance protein
NBS-LRR	Potri.012G122900	Potri.012G122900.1.p	NB-ARC,PF00931.23,Rx_N,PF18052.2,LRR_4,PF12799.8,LRR_8,PF13855.7	'No_CC'	NB-ARC domain-containing disease resistance protein
NBS	Potri.012G123000	Potri.012G123000.3.p	NB-ARC,PF00931.23	'No_CC'	NB-ARC domain-containing disease resistance protein
CC-NBS	Potri.012G123200	Potri.012G123200.1.p	NB-ARC,PF00931.23,Rx_N,PF18052.2	'CC_region'	NB-ARC domain-containing disease resistance protein
NBS-LRR	Potri.012G123400	Potri.012G123400.1.p	NB-ARC,PF00931.23,LRR_4,PF12799.8,LRR_8,PF13855.7	'No_CC'	NB-ARC domain-containing disease resistance protein
NBS-LRR	Potri.012G123500	Potri.012G123500.2.p	NB-ARC,PF00931.23,Rx_N,PF18052.2,LRR_4,PF12799.8,LRR_8,PF13855.7	'No_CC'	NB-ARC domain-containing disease resistance protein
TIR-NBS-LRR	Potri.012G135700	Potri.012G135700.2.p	TIR,PF01582.21,NB-ARC,PF00931.23,TIR_2,PF13676.7,LRR_8,PF13855.7,LRR_4,PF12799.8,AAA_16,PF13191.7	'No_CC'	Disease resistance protein (TIR-NBS-LRR class) family
CC-NBS-LRR	Potri.013G015700	Potri.013G015700.1.p	NB-ARC,PF00931.23,LRR_8,PF13855.7,NACHT,PF05729.13	'CC_region'	NB-ARC domain-containing disease resistance protein
NBS-LRR	Potri.013G015900	Potri.013G015900.2.p	NB-ARC,PF00931.23,NACHT,PF05729.13,LRR_8,PF13855.7	'No_CC'	NB-ARC domain-containing disease resistance protein
NBS	Potri.013G016000	Potri.013G016000.2.p	NB-ARC,PF00931.23,NACHT,PF05729.13,AAA_22,PF13401.7,AAA_16,PF13191.7	'No_CC'	LRR and NB-ARC domains-containing disease resistance protein
NBS-LRR	Potri.013G016200	Potri.013G016200.2.p	NB-ARC,PF00931.23,LRR_8,PF13855.7,NACHT,PF05729.13	'No_CC'	NB-ARC domain-containing disease resistance protein
NBS-LRR	Potri.013G016600	Potri.013G016600.2.p	NB-ARC,PF00931.23,NACHT,PF05729.13,AAA_22,PF13401.7,AAA_16,PF13191.7,ATPase_2,PF01637.19,LRR_8,PF13855.7,AAA_30,PF13604.7,PIF1,PF05970.15,AAA_18,PF13238.7,NTPase_1,PF03266.16,MeaB,PF03308.17,TniB,PF05621.12	'No_CC'	NB-ARC domain-containing disease resistance protein
CC-NBS	Potri.013G027300	Potri.013G027300.1.p	NB-ARC,PF00931.23	'CC_region'	NB-ARC domain-containing disease resistance protein
NBS	Potri.013G027400	Potri.013G027400.1.p	NB-ARC,PF00931.23	'No_CC'	--
CC-NBS	Potri.013G030600	Potri.013G030600.1.p	NB-ARC,PF00931.23,Rx_N,PF18052.2	'CC_region'	NB-ARC domain-containing disease resistance protein
TIR-NBS-LRR	Potri.013G037300	Potri.013G037300.1.p	TIR,PF01582.21,NB-ARC,PF00931.23,TIR_2,PF13676.7,LRR_8,PF13855.7,LRR_4,PF12799.8	'No_CC'	Disease resistance protein (TIR-NBS-LRR class) family
NBS	Potri.013G041750	Potri.013G041750.1.p	NB-ARC,PF00931.23	'No_CC'	NB-ARC domain-containing disease resistance protein
NBS	Potri.013G056000	Potri.013G056000.2.p	NB-ARC,PF00931.23	'No_CC'	HOPZ-ACTIVATED RESISTANCE 1
TIR-NBS-LRR	Potri.013G097000	Potri.013G097000.1.p	NB-ARC,PF00931.23,TIR,PF01582.21,LRR_4,PF12799.8,LRR_8,PF13855.7	'No_CC'	disease resistance protein (TIR-NBS-LRR class), putative
NBS	Potri.013G097200	Potri.013G097200.1.p	NB-ARC,PF00931.23	'No_CC'	disease resistance protein (TIR-NBS-LRR class), putative
TIR-NBS-LRR	Potri.013G097300	Potri.013G097300.4.p	TIR,PF01582.21,NB-ARC,PF00931.23,TIR_2,PF13676.7,LRR_8,PF13855.7,LRR_4,PF12799.8	'No_CC'	disease resistance protein (TIR-NBS-LRR class), putative
TIR-NBS	Potri.013G097900	Potri.013G097900.2.p	TIR,PF01582.21,NB-ARC,PF00931.23,TIR_2,PF13676.7	'No_CC'	disease resistance protein (TIR-NBS-LRR class), putative
TIR-NBS-LRR	Potri.013G098000	Potri.013G098000.1.p	TIR,PF01582.21,NB-ARC,PF00931.23,TIR_2,PF13676.7,LRR_4,PF12799.8,LRR_8,PF13855.7	'No_CC'	disease resistance protein (TIR-NBS-LRR class), putative
TIR-NBS-LRR	Potri.013G098550	Potri.013G098550.1.p	TIR,PF01582.21,NB-ARC,PF00931.23,TIR_2,PF13676.7,LRR_4,PF12799.8,LRR_8,PF13855.7	'No_CC'	disease resistance protein (TIR-NBS-LRR class), putative
NBS-LRR	Potri.014G001900	Potri.014G001900.1.p	NB-ARC,PF00931.23,Rx_N,PF18052.2,LRR_4,PF12799.8,LRR_8,PF13855.7,NACHT,PF05729.13	'No_CC'	NB-ARC domain-containing disease resistance protein
NBS-LRR	Potri.014G002000	Potri.014G002000.1.p	NB-ARC,PF00931.23,Rx_N,PF18052.2,LRR_4,PF12799.8,LRR_8,PF13855.7	'No_CC'	NB-ARC domain-containing disease resistance protein
NBS-LRR	Potri.014G002200	Potri.014G002200.1.p	NB-ARC,PF00931.23,Rx_N,PF18052.2,LRR_4,PF12799.8,LRR_8,PF13855.7	'No_CC'	LRR and NB-ARC domains-containing disease resistance protein
NBS-LRR	Potri.014G002300	Potri.014G002300.1.p	NB-ARC,PF00931.23,LRR_4,PF12799.8,LRR_8,PF13855.7	'No_CC'	NB-ARC domain-containing disease resistance protein
NBS-LRR	Potri.014G002900	Potri.014G002900.1.p	NB-ARC,PF00931.23,Rx_N,PF18052.2,LRR_4,PF12799.8,LRR_8,PF13855.7	'No_CC'	LRR and NB-ARC domains-containing disease resistance protein
CC-NBS-LRR	Potri.014G003200	Potri.014G003200.1.p	NB-ARC,PF00931.23,Rx_N,PF18052.2,LRR_4,PF12799.8,LRR_8,PF13855.7,NACHT,PF05729.13	'CC_region'	LRR and NB-ARC domains-containing disease resistance protein
NBS-LRR	Potri.014G003400	Potri.014G003400.1.p	NB-ARC,PF00931.23,LRR_4,PF12799.8	'No_CC'	LRR and NB-ARC domains-containing disease resistance protein
NBS-LRR	Potri.014G003600	Potri.014G003600.3.p	NB-ARC,PF00931.23,Rx_N,PF18052.2,LRR_4,PF12799.8,LRR_8,PF13855.7	'No_CC'	LRR and NB-ARC domains-containing disease resistance protein
NBS-LRR	Potri.014G003832	Potri.014G003832.1.p	NB-ARC,PF00931.23,Rx_N,PF18052.2,LRR_4,PF12799.8,LRR_8,PF13855.7	'No_CC'	NB-ARC domain-containing disease resistance protein
NBS	Potri.014G005300	Potri.014G005300.2.p	Rx_N,PF18052.2,NB-ARC,PF00931.23	'No_CC'	Disease resistance protein (CC-NBS-LRR class) family
CC-NBS-LRR	Potri.014G005400	Potri.014G005400.3.p	NB-ARC,PF00931.23,LRR_4,PF12799.8,Rx_N,PF18052.2,LRR_8,PF13855.7,AAA_22,PF13401.7	'CC_region'	LRR and NB-ARC domains-containing disease resistance protein
NBS-LRR	Potri.014G005600	Potri.014G005600.3.p	NB-ARC,PF00931.23,Rx_N,PF18052.2,LRR_4,PF12799.8,LRR_8,PF13855.7	'No_CC'	NB-ARC domain-containing disease resistance protein
NBS-LRR	Potri.014G007600	Potri.014G007600.2.p	NB-ARC,PF00931.23,Rx_N,PF18052.2,LRR_4,PF12799.8,LRR_8,PF13855.7	'No_CC'	LRR and NB-ARC domains-containing disease resistance protein
CC-NBS-LRR	Potri.014G007900	Potri.014G007900.1.p	NB-ARC,PF00931.23,Rx_N,PF18052.2,LRR_4,PF12799.8,LRR_8,PF13855.7,NACHT,PF05729.13	'CC_region'	NB-ARC domain-containing disease resistance protein
CC-NBS-LRR	Potri.014G009300	Potri.014G009300.2.p	NB-ARC,PF00931.23,Rx_N,PF18052.2,LRR_4,PF12799.8,LRR_8,PF13855.7,NACHT,PF05729.13	'CC_region'	NB-ARC domain-containing disease resistance protein
CC-NBS-LRR	Potri.014G009400	Potri.014G009400.1.p	NB-ARC,PF00931.23,Rx_N,PF18052.2,LRR_4,PF12799.8,LRR_8,PF13855.7,NACHT,PF05729.13,AAA_22,PF13401.7	'CC_region'	NB-ARC domain-containing disease resistance protein
CC-NBS-LRR	Potri.014G009600	Potri.014G009600.1.p	NB-ARC,PF00931.23,Rx_N,PF18052.2,LRR_4,PF12799.8,LRR_8,PF13855.7,AAA_16,PF13191.7	'CC_region'	NB-ARC domain-containing disease resistance protein
NBS-LRR	Potri.014G010600	Potri.014G010600.1.p	NB-ARC,PF00931.23,Rx_N,PF18052.2,LRR_4,PF12799.8,LRR_8,PF13855.7	'No_CC'	NB-ARC domain-containing disease resistance protein
NBS-LRR	Potri.014G010700	Potri.014G010700.2.p	NB-ARC,PF00931.23,Rx_N,PF18052.2,LRR_4,PF12799.8,LRR_8,PF13855.7	'No_CC'	NB-ARC domain-containing disease resistance protein
NBS-LRR	Potri.014G010900	Potri.014G010900.1.p	NB-ARC,PF00931.23,Rx_N,PF18052.2,LRR_4,PF12799.8,LRR_8,PF13855.7	'No_CC'	NB-ARC domain-containing disease resistance protein
CC-NBS-LRR	Potri.014G011400	Potri.014G011400.2.p	NB-ARC,PF00931.23,Rx_N,PF18052.2,LRR_4,PF12799.8	'CC_region'	NB-ARC domain-containing disease resistance protein
CC-NBS	Potri.014G011600	Potri.014G011600.1.p	NB-ARC,PF00931.23,Rx_N,PF18052.2	'CC_region'	NB-ARC domain-containing disease resistance protein
NBS-LRR	Potri.014G012000	Potri.014G012000.1.p	NB-ARC,PF00931.23,Rx_N,PF18052.2,LRR_4,PF12799.8	'No_CC'	NB-ARC domain-containing disease resistance protein
NBS	Potri.014G035700	Potri.014G035700.1.p	NB-ARC,PF00931.23,RPW8,PF05659.12	'No_CC'	ADR1-like 1
TIR-NBS-LRR	Potri.014G063500	Potri.014G063500.1.p	NB-ARC,PF00931.23,LRR_8,PF13855.7,TIR,PF01582.21,LRR_4,PF12799.8	'No_CC'	disease resistance protein (TIR-NBS-LRR class), putative
TIR-NBS-LRR	Potri.014G063900	Potri.014G063900.1.p	TIR,PF01582.21,NB-ARC,PF00931.23,TIR_2,PF13676.7,LRR_8,PF13855.7,LRR_4,PF12799.8	'No_CC'	disease resistance protein (TIR-NBS-LRR class), putative
TIR-NBS-LRR	Potri.014G064100	Potri.014G064100.2.p	TIR,PF01582.21,NB-ARC,PF00931.23,TIR_2,PF13676.7,LRR_8,PF13855.7,LRR_4,PF12799.8	'CC_region'	disease resistance protein (TIR-NBS-LRR class), putative
TIR-NBS-LRR	Potri.014G064300	Potri.014G064300.2.p	TIR,PF01582.21,NB-ARC,PF00931.23,TIR_2,PF13676.7,LRR_8,PF13855.7,LRR_4,PF12799.8	'No_CC'	disease resistance protein (TIR-NBS-LRR class), putative
TIR-NBS-LRR	Potri.014G064500	Potri.014G064500.1.p	TIR,PF01582.21,NB-ARC,PF00931.23,TIR_2,PF13676.7,LRR_4,PF12799.8,LRR_8,PF13855.7	'No_CC'	disease resistance protein (TIR-NBS-LRR class), putative
TIR-NBS	Potri.014G064801	Potri.014G064801.1.p	TIR,PF01582.21,NB-ARC,PF00931.23,TIR_2,PF13676.7	'No_CC'	disease resistance protein (TIR-NBS-LRR class), putative
CC-NBS-LRR	Potri.014G185801	Potri.014G185801.1.p	NB-ARC,PF00931.23,LRR_4,PF12799.8,Rx_N,PF18052.2,LRR_8,PF13855.7	'CC_region'	LRR and NB-ARC domains-containing disease resistance protein
TIR-NBS	Potri.015G043501	Potri.015G043501.1.p	TIR,PF01582.21,NB-ARC,PF00931.23,TIR_2,PF13676.7,NACHT,PF05729.13	'No_CC'	transmembrane receptors;ATP binding
TIR-NBS-LRR	Potri.015G043600	Potri.015G043600.2.p	TIR,PF01582.21,NB-ARC,PF00931.23,LRR_8,PF13855.7,LRR_4,PF12799.8,TIR_2,PF13676.7,NACHT,PF05729.13	'No_CC'	transmembrane receptors;ATP binding
NBS	Potri.015G118100	Potri.015G118100.1.p	NB-ARC,PF00931.23	'No_CC'	NB-ARC domain-containing disease resistance protein
CC-NBS-LRR	Potri.015G121800	Potri.015G121800.1.p	NB-ARC,PF00931.23,Rx_N,PF18052.2,LRR_8,PF13855.7,LRR_4,PF12799.8	'CC_region'	NB-ARC domain-containing disease resistance protein
NBS	Potri.016G086050	Potri.016G086050.1.p	NB-ARC,PF00931.23,NACHT,PF05729.13	'No_CC'	LRR and NB-ARC domains-containing disease resistance protein
NBS	Potri.016G092600	Potri.016G092600.1.p	NB-ARC,PF00931.23,Rx_N,PF18052.2	'No_CC'	HOPZ-ACTIVATED RESISTANCE 1
TIR-NBS-LRR	Potri.017G010800	Potri.017G010800.1.p	TIR,PF01582.21,NB-ARC,PF00931.23,TIR_2,PF13676.7,LRR_4,PF12799.8,LRR_8,PF13855.7	'No_CC'	disease resistance protein (TIR-NBS-LRR class), putative
TIR-NBS-LRR	Potri.017G011800	Potri.017G011800.2.p	TIR,PF01582.21,NB-ARC,PF00931.23,TIR_2,PF13676.7,LRR_4,PF12799.8,LRR_8,PF13855.7	'No_CC'	disease resistance protein (TIR-NBS-LRR class), putative
CC-NBS	Potri.017G014900	Potri.017G014900.1.p	NB-ARC,PF00931.23,Rx_N,PF18052.2	'CC_region'	NB-ARC domain-containing disease resistance protein
NBS-LRR	Potri.017G015200	Potri.017G015200.1.p	NB-ARC,PF00931.23,Rx_N,PF18052.2,LRR_4,PF12799.8	'No_CC'	LRR and NB-ARC domains-containing disease resistance protein
CC-NBS-LRR	Potri.017G015300	Potri.017G015300.1.p	NB-ARC,PF00931.23,Rx_N,PF18052.2,LRR_4,PF12799.8	'CC_region'	LRR and NB-ARC domains-containing disease resistance protein
CC-NBS	Potri.017G015466	Potri.017G015466.1.p	NB-ARC,PF00931.23,Rx_N,PF18052.2	'CC_region'	NB-ARC domain-containing disease resistance protein
NBS-LRR	Potri.017G015532	Potri.017G015532.1.p	LRR_4,PF12799.8	'No_CC'	NB-ARC domain-containing disease resistance protein
NBS-LRR	Potri.017G015600	Potri.017G015600.1.p	NB-ARC,PF00931.23,Rx_N,PF18052.2,LRR_4,PF12799.8,LRR_8,PF13855.7	'No_CC'	LRR and NB-ARC domains-containing disease resistance protein
NBS-LRR	Potri.017G034200	Potri.017G034200.2.p	NB-ARC,PF00931.23,LRR_8,PF13855.7	'No_CC'	NB-ARC domain-containing disease resistance protein
NBS	Potri.017G034400	Potri.017G034400.1.p	NB-ARC,PF00931.23,AAA_16,PF13191.7,AAA_22,PF13401.7	'No_CC'	LRR and NB-ARC domains-containing disease resistance protein
NBS-LRR	Potri.017G035300	Potri.017G035300.1.p	NB-ARC,PF00931.23,LRR_8,PF13855.7,LRR_4,PF12799.8	'No_CC'	Disease resistance protein (CC-NBS-LRR class) family
TIR-NBS-LRR	Potri.017G102900	Potri.017G102900.1.p	TIR,PF01582.21,NB-ARC,PF00931.23,TIR_2,PF13676.7,LRR_8,PF13855.7,LRR_4,PF12799.8	'CC_region'	disease resistance protein (TIR-NBS-LRR class), putative
TIR-NBS-LRR	Potri.017G103100	Potri.017G103100.3.p	TIR,PF01582.21,NB-ARC,PF00931.23,TIR_2,PF13676.7,LRR_8,PF13855.7,LRR_4,PF12799.8	'No_CC'	disease resistance protein (TIR-NBS-LRR class), putative
TIR-NBS	Potri.017G103300	Potri.017G103300.2.p	NB-ARC,PF00931.23,TIR,PF01582.21	'CC_region'	disease resistance protein (TIR-NBS-LRR class), putative
TIR-NBS	Potri.017G103501	Potri.017G103501.1.p	TIR,PF01582.21,NB-ARC,PF00931.23,TIR_2,PF13676.7	'No_CC'	disease resistance protein (TIR-NBS-LRR class), putative
TIR-NBS-LRR	Potri.017G103800	Potri.017G103800.2.p	TIR,PF01582.21,NB-ARC,PF00931.23,TIR_2,PF13676.7,LRR_8,PF13855.7,LRR_4,PF12799.8	'CC_region'	disease resistance protein (TIR-NBS-LRR class), putative
NBS-LRR	Potri.017G104240	Potri.017G104240.1.p	NB-ARC,PF00931.23,LRR_4,PF12799.8,LRR_8,PF13855.7	'No_CC'	disease resistance protein (TIR-NBS-LRR class), putative
NBS	Potri.017G104833	Potri.017G104833.1.p	NB-ARC,PF00931.23	'No_CC'	disease resistance protein (TIR-NBS-LRR class), putative
TIR-NBS-LRR	Potri.017G105000	Potri.017G105000.3.p	TIR,PF01582.21,NB-ARC,PF00931.23,TIR_2,PF13676.7,LRR_8,PF13855.7,LRR_4,PF12799.8	'CC_region'	disease resistance protein (TIR-NBS-LRR class), putative
TIR-NBS	Potri.017G105300	Potri.017G105300.1.p	TIR,PF01582.21,NB-ARC,PF00931.23,TIR_2,PF13676.7	'No_CC'	disease resistance protein (TIR-NBS-LRR class), putative
TIR-NBS-LRR	Potri.017G105500	Potri.017G105500.1.p	TIR,PF01582.21,NB-ARC,PF00931.23,TIR_2,PF13676.7,LRR_8,PF13855.7,LRR_4,PF12799.8	'CC_region'	Disease resistance protein (TIR-NBS-LRR class) family
TIR-NBS	Potri.017G105700	Potri.017G105700.2.p	TIR,PF01582.21,NB-ARC,PF00931.23,TIR_2,PF13676.7	'No_CC'	disease resistance protein (TIR-NBS-LRR class), putative
NBS-LRR	Potri.017G106500	Potri.017G106500.1.p	NB-ARC,PF00931.23,LRR_4,PF12799.8,LRR_8,PF13855.7,Rx_N,PF18052.2,AAA_16,PF13191.7	'No_CC'	NB-ARC domain-containing disease resistance protein
NBS-LRR	Potri.017G121500	Potri.017G121500.1.p	NB-ARC,PF00931.23,Rx_N,PF18052.2,LRR_8,PF13855.7,LRR_4,PF12799.8	'No_CC'	LRR and NB-ARC domains-containing disease resistance protein
NBS-LRR	Potri.017G121700	Potri.017G121700.1.p	NB-ARC,PF00931.23,Rx_N,PF18052.2,LRR_4,PF12799.8,LRR_8,PF13855.7	'No_CC'	LRR and NB-ARC domains-containing disease resistance protein
NBS-LRR	Potri.017G121900	Potri.017G121900.1.p	NB-ARC,PF00931.23,Rx_N,PF18052.2,LRR_4,PF12799.8,LRR_8,PF13855.7	'No_CC'	LRR and NB-ARC domains-containing disease resistance protein
NBS-LRR	Potri.017G123500	Potri.017G123500.2.p	NB-ARC,PF00931.23,LRR_4,PF12799.8,LRR_8,PF13855.7	'No_CC'	NB-ARC domain-containing disease resistance protein
CC-NBS-LRR	Potri.017G126950	Potri.017G126950.1.p	NB-ARC,PF00931.23,Rx_N,PF18052.2,LRR_8,PF13855.7,LRR_4,PF12799.8	'CC_region'	LRR and NB-ARC domains-containing disease resistance protein
CC-NBS-LRR	Potri.017G127200	Potri.017G127200.1.p	NB-ARC,PF00931.23,Rx_N,PF18052.2,LRR_8,PF13855.7,LRR_4,PF12799.8	'CC_region'	LRR and NB-ARC domains-containing disease resistance protein
CC-NBS-LRR	Potri.017G127600	Potri.017G127600.1.p	NB-ARC,PF00931.23,Rx_N,PF18052.2,LRR_8,PF13855.7,LRR_4,PF12799.8	'CC_region'	LRR and NB-ARC domains-containing disease resistance protein
CC-NBS-LRR	Potri.017G127800	Potri.017G127800.1.p	NB-ARC,PF00931.23,Rx_N,PF18052.2,LRR_4,PF12799.8,LRR_8,PF13855.7	'CC_region'	LRR and NB-ARC domains-containing disease resistance protein
CC-NBS-LRR	Potri.017G128000	Potri.017G128000.1.p	NB-ARC,PF00931.23,Rx_N,PF18052.2,LRR_4,PF12799.8,LRR_8,PF13855.7	'CC_region'	LRR and NB-ARC domains-containing disease resistance protein
CC-NBS-LRR	Potri.017G130900	Potri.017G130900.1.p	NB-ARC,PF00931.23,Rx_N,PF18052.2,LRR_8,PF13855.7,LRR_4,PF12799.8	'CC_region'	NB-ARC domain-containing disease resistance protein
NBS	Potri.017G131200	Potri.017G131200.1.p	NB-ARC,PF00931.23	'No_CC'	LRR and NB-ARC domains-containing disease resistance protein
NBS-LRR	Potri.017G132100	Potri.017G132100.1.p	NB-ARC,PF00931.23,LRR_8,PF13855.7,LRR_4,PF12799.8	'No_CC'	Disease resistance protein (TIR-NBS-LRR class) family
NBS-LRR	Potri.017G133600	Potri.017G133600.1.p	NB-ARC,PF00931.23,Rx_N,PF18052.2,LRR_8,PF13855.7,LRR_4,PF12799.8	'No_CC'	LRR and NB-ARC domains-containing disease resistance protein
NBS-LRR	Potri.017G133700	Potri.017G133700.1.p	NB-ARC,PF00931.23,Rx_N,PF18052.2,LRR_8,PF13855.7,LRR_4,PF12799.8	'No_CC'	NB-ARC domain-containing disease resistance protein
NBS-LRR	Potri.017G136400	Potri.017G136400.1.p	NB-ARC,PF00931.23,Rx_N,PF18052.2,LRR_8,PF13855.7,LRR_4,PF12799.8,AAA_16,PF13191.7	'No_CC'	LRR and NB-ARC domains-containing disease resistance protein
NBS-LRR	Potri.017G136700	Potri.017G136700.1.p	NB-ARC,PF00931.23,Rx_N,PF18052.2,LRR_8,PF13855.7,LRR_4,PF12799.8	'No_CC'	NB-ARC domain-containing disease resistance protein
CC-NBS-LRR	Potri.017G136900	Potri.017G136900.1.p	NB-ARC,PF00931.23,Rx_N,PF18052.2,LRR_8,PF13855.7,LRR_4,PF12799.8	'CC_region'	LRR and NB-ARC domains-containing disease resistance protein
NBS-LRR	Potri.017G137700	Potri.017G137700.1.p	NB-ARC,PF00931.23,Rx_N,PF18052.2,LRR_8,PF13855.7,LRR_4,PF12799.8	'No_CC'	NB-ARC domain-containing disease resistance protein
NBS	Potri.017G137750	Potri.017G137750.1.p	Rx_N,PF18052.2,NB-ARC,PF00931.23	'No_CC'	NB-ARC domain-containing disease resistance protein
NBS	Potri.017G137801	Potri.017G137801.1.p	NB-ARC,PF00931.23	'No_CC'	LRR and NB-ARC domains-containing disease resistance protein
NBS-LRR	Potri.017G137900	Potri.017G137900.2.p	NB-ARC,PF00931.23,Rx_N,PF18052.2,LRR_8,PF13855.7,LRR_4,PF12799.8	'No_CC'	LRR and NB-ARC domains-containing disease resistance protein
CC-NBS-LRR	Potri.017G138100	Potri.017G138100.1.p	NB-ARC,PF00931.23,Rx_N,PF18052.2,LRR_8,PF13855.7,LRR_4,PF12799.8,AAA_16,PF13191.7	'CC_region'	LRR and NB-ARC domains-containing disease resistance protein
CC-NBS	Potri.017G143400	Potri.017G143400.2.p	NB-ARC,PF00931.23,Rx_N,PF18052.2	'CC_region'	NB-ARC domain-containing disease resistance protein
CC-NBS-LRR	Potri.017G143500	Potri.017G143500.1.p	NB-ARC,PF00931.23,Rx_N,PF18052.2,LRR_8,PF13855.7	'CC_region'	NB-ARC domain-containing disease resistance protein
NBS-LRR	Potri.017G143600	Potri.017G143600.3.p	NB-ARC,PF00931.23,LRR_8,PF13855.7	'No_CC'	NB-ARC domain-containing disease resistance protein
CC-NBS	Potri.017G143700	Potri.017G143700.1.p	NB-ARC,PF00931.23,Rx_N,PF18052.2	'CC_region'	NB-ARC domain-containing disease resistance protein
CC-NBS-LRR	Potri.017G143800	Potri.017G143800.1.p	NB-ARC,PF00931.23,Rx_N,PF18052.2,LRR_8,PF13855.7	'CC_region'	NB-ARC domain-containing disease resistance protein
CC-NBS	Potri.017G144066	Potri.017G144066.1.p	NB-ARC,PF00931.23,Rx_N,PF18052.2	'CC_region'	NB-ARC domain-containing disease resistance protein
NBS	Potri.017G144100	Potri.017G144100.1.p	NB-ARC,PF00931.23	'No_CC'	NB-ARC domain-containing disease resistance protein
CC-NBS-LRR	Potri.017G144200	Potri.017G144200.1.p	NB-ARC,PF00931.23,Rx_N,PF18052.2,LRR_8,PF13855.7	'CC_region'	NB-ARC domain-containing disease resistance protein
CC-NBS	Potri.017G144300	Potri.017G144300.1.p	NB-ARC,PF00931.23,Rx_N,PF18052.2	'CC_region'	NB-ARC domain-containing disease resistance protein
NBS-LRR	Potri.017G144400	Potri.017G144400.2.p	NB-ARC,PF00931.23,LRR_8,PF13855.7	'No_CC'	NB-ARC domain-containing disease resistance protein
NBS	Potri.017G144450	Potri.017G144450.1.p	NB-ARC,PF00931.23	'No_CC'	Disease resistance protein (CC-NBS-LRR class) family
NBS-LRR	Potri.017G145000	Potri.017G145000.2.p	NB-ARC,PF00931.23,Rx_N,PF18052.2,LRR_4,PF12799.8	'No_CC'	NB-ARC domain-containing disease resistance protein
NBS	Potri.017G145600	Potri.017G145600.1.p	NB-ARC,PF00931.23	'No_CC'	LRR and NB-ARC domains-containing disease resistance protein
CC-NBS-LRR	Potri.018G003200	Potri.018G003200.1.p	NB-ARC,PF00931.23,Rx_N,PF18052.2,LRR_4,PF12799.8,AAA_16,PF13191.7,LRR_8,PF13855.7	'CC_region'	NB-ARC domain-containing disease resistance protein
NBS-LRR	Potri.018G004600	Potri.018G004600.1.p	NB-ARC,PF00931.23,Rx_N,PF18052.2,LRR_4,PF12799.8	'No_CC'	NB-ARC domain-containing disease resistance protein
NBS-LRR	Potri.018G004900	Potri.018G004900.2.p	NB-ARC,PF00931.23,Rx_N,PF18052.2,LRR_4,PF12799.8,LRR_8,PF13855.7,AAA_22,PF13401.7	'No_CC'	NB-ARC domain-containing disease resistance protein
NBS	Potri.018G013500	Potri.018G013500.1.p	NB-ARC,PF00931.23,Rx_N,PF18052.2,AAA_22,PF13401.7	'No_CC'	NB-ARC domain-containing disease resistance protein
CC-NBS	Potri.018G017900	Potri.018G017900.1.p	NB-ARC,PF00931.23,Rx_N,PF18052.2	'CC_region'	NB-ARC domain-containing disease resistance protein
CC-NBS-LRR	Potri.018G080500	Potri.018G080500.1.p	NB-ARC,PF00931.23,Rx_N,PF18052.2,LRR_8,PF13855.7,LRR_4,PF12799.8	'CC_region'	LRR and NB-ARC domains-containing disease resistance protein
NBS-LRR	Potri.018G080700	Potri.018G080700.1.p	NB-ARC,PF00931.23,Rx_N,PF18052.2,LRR_8,PF13855.7,AAA_16,PF13191.7	'No_CC'	NB-ARC domain-containing disease resistance protein
NBS-LRR	Potri.018G135600	Potri.018G135600.1.p	NB-ARC,PF00931.23,LRR_8,PF13855.7,NACHT,PF05729.13,AAA_16,PF13191.7	'No_CC'	LRR and NB-ARC domains-containing disease resistance protein
NBS-LRR	Potri.018G135700	Potri.018G135700.1.p	NB-ARC,PF00931.23,Rx_N,PF18052.2,LRR_4,PF12799.8,LRR_8,PF13855.7	'No_CC'	LRR and NB-ARC domains-containing disease resistance protein
CC-NBS-LRR	Potri.018G135800	Potri.018G135800.1.p	NB-ARC,PF00931.23,Rx_N,PF18052.2,LRR_8,PF13855.7,LRR_4,PF12799.8	'CC_region'	LRR and NB-ARC domains-containing disease resistance protein
NBS-LRR	Potri.018G136301	Potri.018G136301.1.p	NB-ARC,PF00931.23,LRR_8,PF13855.7,LRR_4,PF12799.8,ATPase_2,PF01637.19,NACHT,PF05729.13	'No_CC'	LRR and NB-ARC domains-containing disease resistance protein
NBS	Potri.018G136450	Potri.018G136450.1.p	NB-ARC,PF00931.23	'No_CC'	hAT transposon superfamily
NBS-LRR	Potri.018G136500	Potri.018G136500.2.p	LRR_8,PF13855.7,NB-ARC,PF00931.23,LRR_4,PF12799.8	'No_CC'	NB-ARC domain-containing disease resistance protein
NBS-LRR	Potri.018G136700	Potri.018G136700.1.p	NB-ARC,PF00931.23,LRR_8,PF13855.7	'No_CC'	NB-ARC domain-containing disease resistance protein
NBS-LRR	Potri.018G137800	Potri.018G137800.1.p	NB-ARC,PF00931.23,LRR_8,PF13855.7	'No_CC'	NB-ARC domain-containing disease resistance protein
NBS-LRR	Potri.018G137900	Potri.018G137900.2.p	NB-ARC,PF00931.23,LRR_8,PF13855.7,ATPase_2,PF01637.19,LRR_4,PF12799.8	'No_CC'	NB-ARC domain-containing disease resistance protein
CC-NBS-LRR	Potri.018G138500	Potri.018G138500.2.p	NB-ARC,PF00931.23,Rx_N,PF18052.2,LRR_8,PF13855.7,AAA_22,PF13401.7	'CC_region'	NB-ARC domain-containing disease resistance protein
TIR-NBS-LRR	Potri.019G001600	Potri.019G001600.1.p	TIR,PF01582.21,NB-ARC,PF00931.23,TIR_2,PF13676.7,LRR_8,PF13855.7	'No_CC'	Disease resistance protein (TIR-NBS-LRR class) family
TIR-NBS	Potri.019G001701	Potri.019G001701.1.p	TIR,PF01582.21,NB-ARC,PF00931.23,TIR_2,PF13676.7,AAA_16,PF13191.7	'No_CC'	Disease resistance protein (TIR-NBS-LRR class) family
TIR-NBS-LRR	Potri.019G002500	Potri.019G002500.1.p	TIR,PF01582.21,NB-ARC,PF00931.23,TIR_2,PF13676.7,LRR_4,PF12799.8,LRR_8,PF13855.7	'No_CC'	disease resistance protein (TIR-NBS-LRR class), putative
TIR-NBS	Potri.019G002601	Potri.019G002601.1.p	TIR,PF01582.21,NB-ARC,PF00931.23,TIR_2,PF13676.7	'No_CC'	Disease resistance protein (TIR-NBS-LRR class) family
NBS	Potri.019G002700	Potri.019G002700.1.p	NB-ARC,PF00931.23	'No_CC'	LRR and NB-ARC domains-containing disease resistance protein
NBS-LRR	Potri.019G002800	Potri.019G002800.3.p	NB-ARC,PF00931.23,LRR_8,PF13855.7,LRR_4,PF12799.8	'No_CC'	LRR and NB-ARC domains-containing disease resistance protein
NBS-LRR	Potri.019G014500	Potri.019G014500.2.p	NB-ARC,PF00931.23,LRR_8,PF13855.7,LRR_4,PF12799.8	'No_CC'	Disease resistance protein (CC-NBS-LRR class) family
NBS-LRR	Potri.019G018800	Potri.019G018800.1.p	LRR_8,PF13855.7,NB-ARC,PF00931.23,LRR_4,PF12799.8	'No_CC'	Disease resistance protein (TIR-NBS-LRR class) family
NBS-LRR	Potri.019G020200	Potri.019G020200.1.p	NB-ARC,PF00931.23,LRR_8,PF13855.7	'No_CC'	LRR and NB-ARC domains-containing disease resistance protein
NBS-LRR	Potri.019G020400	Potri.019G020400.1.p	LRR_8,PF13855.7,LRR_4,PF12799.8	'No_CC'	NB-ARC domain-containing disease resistance protein
NBS-LRR	Potri.019G020500	Potri.019G020500.1.p	NB-ARC,PF00931.23,LRR_8,PF13855.7,LRR_4,PF12799.8	'No_CC'	NB-ARC domain-containing disease resistance protein
NBS-LRR	Potri.019G022800	Potri.019G022800.1.p	NB-ARC,PF00931.23,LRR_8,PF13855.7,LRR_4,PF12799.8	'No_CC'	NB-ARC domain-containing disease resistance protein
NBS-LRR	Potri.019G023300	Potri.019G023300.1.p	NB-ARC,PF00931.23,LRR_8,PF13855.7,LRR_4,PF12799.8	'No_CC'	NB-ARC domain-containing disease resistance protein
NBS-LRR	Potri.019G036900	Potri.019G036900.1.p	LRR_4,PF12799.8	'No_CC'	Leucine-rich repeat (LRR) family protein
TIR-NBS	Potri.019G046000	Potri.019G046000.1.p	TIR,PF01582.21,NB-ARC,PF00931.23,TIR_2,PF13676.7,AAA_16,PF13191.7	'No_CC'	Disease resistance protein (TIR-NBS-LRR class) family
TIR-NBS-LRR	Potri.019G052000	Potri.019G052000.2.p	TIR,PF01582.21,NB-ARC,PF00931.23,TIR_2,PF13676.7,LRR_8,PF13855.7	'No_CC'	Disease resistance protein (TIR-NBS-LRR class) family
TIR-NBS-LRR	Potri.019G068200	Potri.019G068200.1.p	TIR,PF01582.21,NB-ARC,PF00931.23,LRR_4,PF12799.8,TIR_2,PF13676.7,LRR_8,PF13855.7	'No_CC'	disease resistance protein (TIR-NBS-LRR class), putative
TIR-NBS-LRR	Potri.019G068300	Potri.019G068300.1.p	TIR,PF01582.21,NB-ARC,PF00931.23,LRR_4,PF12799.8,LRR_8,PF13855.7,TIR_2,PF13676.7	'No_CC'	disease resistance protein (TIR-NBS-LRR class), putative
TIR-NBS-LRR	Potri.019G069200	Potri.019G069200.1.p	TIR,PF01582.21,NB-ARC,PF00931.23,LRR_8,PF13855.7,LRR_4,PF12799.8,TIR_2,PF13676.7	'CC_region'	disease resistance protein (TIR-NBS-LRR class), putative
TIR-NBS-LRR	Potri.019G069500	Potri.019G069500.1.p	TIR,PF01582.21,NB-ARC,PF00931.23,LRR_8,PF13855.7,LRR_4,PF12799.8,TIR_2,PF13676.7	'No_CC'	disease resistance protein (TIR-NBS-LRR class), putative
TIR-NBS-LRR	Potri.019G069600	Potri.019G069600.2.p	TIR,PF01582.21,NB-ARC,PF00931.23,LRR_8,PF13855.7,LRR_4,PF12799.8,TIR_2,PF13676.7	'No_CC'	Disease resistance protein (TIR-NBS-LRR class) family
TIR-NBS-LRR	Potri.019G070300	Potri.019G070300.2.p	TIR,PF01582.21,NB-ARC,PF00931.23,TIR_2,PF13676.7,LRR_4,PF12799.8	'No_CC'	disease resistance protein (TIR-NBS-LRR class), putative
TIR-NBS-LRR	Potri.019G070460	Potri.019G070460.1.p	TIR,PF01582.21,NB-ARC,PF00931.23,LRR_4,PF12799.8,LRR_8,PF13855.7,TIR_2,PF13676.7	'No_CC'	disease resistance protein (TIR-NBS-LRR class), putative
NBS	Potri.019G070640	Potri.019G070640.1.p	NB-ARC,PF00931.23	'No_CC'	Disease resistance protein (TIR-NBS-LRR class) family
TIR-NBS-LRR	Potri.019G070700	Potri.019G070700.2.p	TIR,PF01582.21,NB-ARC,PF00931.23,LRR_8,PF13855.7,LRR_4,PF12799.8,TIR_2,PF13676.7	'No_CC'	disease resistance protein (TIR-NBS-LRR class), putative
NBS-LRR	Potri.019G074000	Potri.019G074000.1.p	NB-ARC,PF00931.23,Rx_N,PF18052.2,LRR_8,PF13855.7,LRR_4,PF12799.8	'No_CC'	LRR and NB-ARC domains-containing disease resistance protein
NBS-LRR	Potri.019G074200	Potri.019G074200.2.p	NB-ARC,PF00931.23,LRR_8,PF13855.7,LRR_4,PF12799.8	'No_CC'	LRR and NB-ARC domains-containing disease resistance protein
NBS-LRR	Potri.019G074300	Potri.019G074300.2.p	NB-ARC,PF00931.23,LRR_8,PF13855.7,LRR_4,PF12799.8	'No_CC'	LRR and NB-ARC domains-containing disease resistance protein
TIR-NBS	Potri.019G095932	Potri.019G095932.1.p	TIR,PF01582.21,NB-ARC,PF00931.23,TIR_2,PF13676.7	'No_CC'	Disease resistance protein (TIR-NBS-LRR class) family
TIR-NBS-LRR	Potri.019G097100	Potri.019G097100.3.p	TIR,PF01582.21,NB-ARC,PF00931.23,LRR_4,PF12799.8,TIR_2,PF13676.7,LRR_8,PF13855.7,LRR_3,PF07725.13	'No_CC'	Disease resistance protein (TIR-NBS-LRR class) family
NBS	Potri.019G097200	Potri.019G097200.1.p	NB-ARC,PF00931.23	'No_CC'	disease resistance protein (TIR-NBS-LRR class), putative
TIR-NBS	Potri.019G097300	Potri.019G097300.1.p	TIR,PF01582.21,NB-ARC,PF00931.23,TIR_2,PF13676.7	'No_CC'	Disease resistance protein (TIR-NBS-LRR class) family
TIR-NBS	Potri.019G097580	Potri.019G097580.1.p	TIR,PF01582.21,NB-ARC,PF00931.23,TIR_2,PF13676.7	'No_CC'	Disease resistance protein (TIR-NBS-LRR class) family
TIR-NBS-LRR	Potri.019G097800	Potri.019G097800.1.p	TIR,PF01582.21,NB-ARC,PF00931.23,LRR_4,PF12799.8,LRR_8,PF13855.7,TIR_2,PF13676.7	'No_CC'	disease resistance protein (TIR-NBS-LRR class), putative
TIR-NBS-LRR	Potri.019G098500	Potri.019G098500.1.p	TIR,PF01582.21,NB-ARC,PF00931.23,LRR_4,PF12799.8,TIR_2,PF13676.7,LRR_8,PF13855.7	'No_CC'	disease resistance protein (TIR-NBS-LRR class), putative
TIR-NBS	Potri.019G098800	Potri.019G098800.1.p	TIR,PF01582.21,NB-ARC,PF00931.23,TIR_2,PF13676.7	'No_CC'	Disease resistance protein (TIR-NBS-LRR class) family
TIR-NBS-LRR	Potri.019G098900	Potri.019G098900.1.p	TIR,PF01582.21,NB-ARC,PF00931.23,LRR_4,PF12799.8,TIR_2,PF13676.7,LRR_8,PF13855.7,NACHT,PF05729.13,LRR_3,PF07725.13	'No_CC'	disease resistance protein (TIR-NBS-LRR class), putative
TIR-NBS-LRR	Potri.019G112600	Potri.019G112600.1.p	TIR,PF01582.21,NB-ARC,PF00931.23,TIR_2,PF13676.7,LRR_4,PF12799.8,LRR_8,PF13855.7	'No_CC'	Disease resistance protein (TIR-NBS-LRR class) family
TIR-NBS	Potri.019G112700	Potri.019G112700.1.p	TIR,PF01582.21,NB-ARC,PF00931.23,TIR_2,PF13676.7	'No_CC'	Disease resistance protein (TIR-NBS-LRR class) family
TIR-NBS	Potri.019G113500	Potri.019G113500.1.p	TIR,PF01582.21,NB-ARC,PF00931.23,TIR_2,PF13676.7	'No_CC'	Disease resistance protein (TIR-NBS-LRR class) family
TIR-NBS-LRR	Potri.019G113701	Potri.019G113701.1.p	TIR,PF01582.21,LRR_4,PF12799.8,NB-ARC,PF00931.23,LRR_8,PF13855.7,TIR_2,PF13676.7,AAA_14,PF13173.7,LRR_3,PF07725.13	'No_CC'	disease resistance protein (TIR-NBS-LRR class), putative
TIR-NBS	Potri.019G114301	Potri.019G114301.1.p	TIR,PF01582.21,NB-ARC,PF00931.23,TIR_2,PF13676.7,NACHT,PF05729.13	'No_CC'	Disease resistance protein (TIR-NBS-LRR class) family
TIR-NBS-LRR	Potri.019G114600	Potri.019G114600.4.p	TIR,PF01582.21,NB-ARC,PF00931.23,LRR_4,PF12799.8,TIR_2,PF13676.7,LRR_8,PF13855.7,NACHT,PF05729.13,LRR_3,PF07725.13	'No_CC'	Disease resistance protein (TIR-NBS-LRR class) family
TIR-NBS-LRR	Potri.019G114800	Potri.019G114800.2.p	TIR,PF01582.21,NB-ARC,PF00931.23,TIR_2,PF13676.7,LRR_8,PF13855.7	'No_CC'	Disease resistance protein (TIR-NBS-LRR class) family
TIR-NBS-LRR	Potri.T001500	Potri.T001500.1.p	TIR,PF01582.21,NB-ARC,PF00931.23,TIR_2,PF13676.7,LRR_8,PF13855.7	'No_CC'	Disease resistance protein (TIR-NBS-LRR class) family
NBS	Potri.T001600	Potri.T001600.1.p	NB-ARC,PF00931.23	'No_CC'	Disease resistance protein (TIR-NBS-LRR class) family
TIR-NBS-LRR	Potri.T001700	Potri.T001700.1.p	TIR,PF01582.21,NB-ARC,PF00931.23,TIR_2,PF13676.7,LRR_4,PF12799.8	'No_CC'	Disease resistance protein (TIR-NBS-LRR class) family
TIR-NBS-LRR	Potri.T001933	Potri.T001933.1.p	TIR,PF01582.21,NB-ARC,PF00931.23,TIR_2,PF13676.7,LRR_8,PF13855.7,LRR_4,PF12799.8	'No_CC'	Disease resistance protein (TIR-NBS-LRR class) family
TIR-NBS-LRR	Potri.T002066	Potri.T002066.1.p	TIR,PF01582.21,NB-ARC,PF00931.23,TIR_2,PF13676.7,LRR_8,PF13855.7	'No_CC'	Disease resistance protein (TIR-NBS-LRR class) family
NBS-LRR	Potri.T002200	Potri.T002200.1.p	NB-ARC,PF00931.23,LRR_8,PF13855.7,LRR_4,PF12799.8	'No_CC'	Disease resistance protein (TIR-NBS-LRR class) family
NBS-LRR	Potri.T002300	Potri.T002300.1.p	NB-ARC,PF00931.23,LRR_8,PF13855.7	'No_CC'	Disease resistance protein (TIR-NBS-LRR class) family
TIR-NBS-LRR	Potri.T002400	Potri.T002400.1.p	TIR,PF01582.21,NB-ARC,PF00931.23,TIR_2,PF13676.7,LRR_8,PF13855.7,LRR_4,PF12799.8,AAA_16,PF13191.7	'No_CC'	Disease resistance protein (TIR-NBS-LRR class) family
TIR-NBS	Potri.T002428	Potri.T002428.1.p	TIR,PF01582.21,NB-ARC,PF00931.23,TIR_2,PF13676.7	'No_CC'	Disease resistance protein (TIR-NBS-LRR class) family
TIR-NBS	Potri.T002568	Potri.T002568.1.p	TIR,PF01582.21,NB-ARC,PF00931.23,TIR_2,PF13676.7	'No_CC'	Disease resistance protein (TIR-NBS-LRR class) family
TIR-NBS-LRR	Potri.T002600	Potri.T002600.2.p	TIR,PF01582.21,NB-ARC,PF00931.23,TIR_2,PF13676.7,LRR_8,PF13855.7	'No_CC'	Disease resistance protein (TIR-NBS-LRR class) family
NBS-LRR	Potri.T002701	Potri.T002701.1.p	NB-ARC,PF00931.23,LRR_8,PF13855.7	'No_CC'	Disease resistance protein (TIR-NBS-LRR class) family
TIR-NBS-LRR	Potri.T002900	Potri.T002900.4.p	TIR,PF01582.21,NB-ARC,PF00931.23,TIR_2,PF13676.7,LRR_8,PF13855.7,LRR_4,PF12799.8,AAA_16,PF13191.7	'No_CC'	Disease resistance protein (TIR-NBS-LRR class) family
TIR-NBS-LRR	Potri.T003001	Potri.T003001.1.p	TIR,PF01582.21,NB-ARC,PF00931.23,TIR_2,PF13676.7,LRR_8,PF13855.7,LRR_4,PF12799.8	'No_CC'	Disease resistance protein (TIR-NBS-LRR class) family
NBS-LRR	Potri.T003600	Potri.T003600.2.p	NB-ARC,PF00931.23,LRR_8,PF13855.7,NACHT,PF05729.13	'No_CC'	NB-ARC domain-containing disease resistance protein
NBS-LRR	Potri.T003800	Potri.T003800.2.p	NB-ARC,PF00931.23,LRR_8,PF13855.7,ATPase_2,PF01637.19	'No_CC'	NB-ARC domain-containing disease resistance protein
NBS-LRR	Potri.T003900	Potri.T003900.2.p	NB-ARC,PF00931.23,LRR_8,PF13855.7	'No_CC'	NB-ARC domain-containing disease resistance protein
NBS-LRR	Potri.T004100	Potri.T004100.1.p	NB-ARC,PF00931.23,LRR_8,PF13855.7,AAA_22,PF13401.7,ATPase_2,PF01637.19,NACHT,PF05729.13,AAA_16,PF13191.7	'No_CC'	NB-ARC domain-containing disease resistance protein
TIR-NBS-LRR	Potri.T004501	Potri.T004501.1.p	TIR,PF01582.21,NB-ARC,PF00931.23,TIR_2,PF13676.7,LRR_8,PF13855.7,NACHT,PF05729.13,AAA,PF00004.30,LRR_4,PF12799.8	'No_CC'	Disease resistance protein (TIR-NBS-LRR class) family
TIR-NBS-LRR	Potri.T004950	Potri.T004950.1.p	TIR,PF01582.21,NB-ARC,PF00931.23,TIR_2,PF13676.7,LRR_4,PF12799.8,LRR_8,PF13855.7,NACHT,PF05729.13,AAA,PF00004.30	'No_CC'	Disease resistance protein (TIR-NBS-LRR class) family
TIR-NBS	Potri.T005100	Potri.T005100.1.p	TIR,PF01582.21,NB-ARC,PF00931.23,TIR_2,PF13676.7	'No_CC'	Disease resistance protein (TIR-NBS-LRR class) family
TIR-NBS-LRR	Potri.T005300	Potri.T005300.2.p	TIR,PF01582.21,NB-ARC,PF00931.23,TIR_2,PF13676.7,LRR_8,PF13855.7	'No_CC'	Disease resistance protein (TIR-NBS-LRR class) family
TIR-NBS	Potri.T005501	Potri.T005501.1.p	TIR,PF01582.21,NB-ARC,PF00931.23,TIR_2,PF13676.7	'No_CC'	Disease resistance protein (TIR-NBS-LRR class) family
TIR-NBS	Potri.T005601	Potri.T005601.1.p	TIR,PF01582.21,NB-ARC,PF00931.23,TIR_2,PF13676.7	'No_CC'	Disease resistance protein (TIR-NBS-LRR class) family
TIR-NBS	Potri.T010500	Potri.T010500.1.p	TIR,PF01582.21,NB-ARC,PF00931.23,TIR_2,PF13676.7,NACHT,PF05729.13	'No_CC'	Disease resistance protein (TIR-NBS-LRR class) family
TIR-NBS	Potri.T011750	Potri.T011750.1.p	TIR,PF01582.21,NB-ARC,PF00931.23,TIR_2,PF13676.7	'No_CC'	Disease resistance protein (TIR-NBS-LRR class) family
NBS-LRR	Potri.T012000	Potri.T012000.2.p	NB-ARC,PF00931.23,LRR_8,PF13855.7,LRR_4,PF12799.8	'No_CC'	NB-ARC domain-containing disease resistance protein
NBS	Potri.T012900	Potri.T012900.2.p	NB-ARC,PF00931.23,ATPase_2,PF01637.19	'No_CC'	NB-ARC domain-containing disease resistance protein
NBS	Potri.T013200	Potri.T013200.1.p	NB-ARC,PF00931.23,AAA_16,PF13191.7,ATPase_2,PF01637.19	'No_CC'	NB-ARC domain-containing disease resistance protein
NBS-LRR	Potri.T013300	Potri.T013300.4.p	NB-ARC,PF00931.23,LRR_8,PF13855.7	'No_CC'	RPS5-like 1
NBS-LRR	Potri.T013566	Potri.T013566.1.p	LRR_8,PF13855.7,NB-ARC,PF00931.23,LRR_4,PF12799.8	'No_CC'	NB-ARC domain-containing disease resistance protein
NBS	Potri.T013632	Potri.T013632.1.p	NB-ARC,PF00931.23	'No_CC'	RPS5-like 1
NBS-LRR	Potri.T013800	Potri.T013800.1.p	NB-ARC,PF00931.23,LRR_8,PF13855.7,LRR_4,PF12799.8,NACHT,PF05729.13	'No_CC'	NB-ARC domain-containing disease resistance protein
NBS-LRR	Potri.T013900	Potri.T013900.2.p	NB-ARC,PF00931.23,LRR_8,PF13855.7,LRR_4,PF12799.8,NACHT,PF05729.13	'No_CC'	NB-ARC domain-containing disease resistance protein
NBS-LRR	Potri.T014300	Potri.T014300.1.p	NB-ARC,PF00931.23,LRR_8,PF13855.7,NACHT,PF05729.13	'No_CC'	LRR and NB-ARC domains-containing disease resistance protein
NBS-LRR	Potri.T014500	Potri.T014500.2.p	NB-ARC,PF00931.23,LRR_8,PF13855.7,LRR_4,PF12799.8,NACHT,PF05729.13	'No_CC'	LRR and NB-ARC domains-containing disease resistance protein
NBS-LRR	Potri.T014600	Potri.T014600.1.p	NB-ARC,PF00931.23,LRR_8,PF13855.7,LRR_4,PF12799.8	'No_CC'	LRR and NB-ARC domains-containing disease resistance protein
NBS-LRR	Potri.T014700	Potri.T014700.2.p	NB-ARC,PF00931.23,LRR_8,PF13855.7,LRR_4,PF12799.8	'No_CC'	NB-ARC domain-containing disease resistance protein
NBS-LRR	Potri.T014900	Potri.T014900.2.p	NB-ARC,PF00931.23,LRR_8,PF13855.7,LRR_4,PF12799.8	'No_CC'	NB-ARC domain-containing disease resistance protein
NBS	Potri.T014950	Potri.T014950.1.p	NB-ARC,PF00931.23	'No_CC'	LRR and NB-ARC domains-containing disease resistance protein
NBS	Potri.T015200	Potri.T015200.1.p	NB-ARC,PF00931.23	'No_CC'	NB-ARC domain-containing disease resistance protein
NBS	Potri.T015300	Potri.T015300.1.p	NB-ARC,PF00931.23,ATPase_2,PF01637.19	'No_CC'	NB-ARC domain-containing disease resistance protein
NBS	Potri.T015400	Potri.T015400.1.p	NB-ARC,PF00931.23,AAA_16,PF13191.7,AAA_22,PF13401.7,ATPase_2,PF01637.19	'No_CC'	NB-ARC domain-containing disease resistance protein
NBS	Potri.T015475	Potri.T015475.1.p	NB-ARC,PF00931.23,AAA_22,PF13401.7,ATPase_2,PF01637.19	'No_CC'	NB-ARC domain-containing disease resistance protein
NBS	Potri.T015600	Potri.T015600.1.p	NB-ARC,PF00931.23	'No_CC'	Disease resistance protein (CC-NBS-LRR class) family
NBS-LRR	Potri.T015900	Potri.T015900.3.p	NB-ARC,PF00931.23,LRR_8,PF13855.7,LRR_4,PF12799.8	'No_CC'	NB-ARC domain-containing disease resistance protein
NBS-LRR	Potri.T016200	Potri.T016200.3.p	NB-ARC,PF00931.23,LRR_8,PF13855.7,ATPase_2,PF01637.19,AAA_16,PF13191.7,NACHT,PF05729.13,AAA_22,PF13401.7,zf-BED,PF02892.16,AAA_5,PF07728.15,AAA_14,PF13173.7	'No_CC'	NB-ARC domain-containing disease resistance protein
NBS-LRR	Potri.T024700	Potri.T024700.1.p	NB-ARC,PF00931.23,LRR_8,PF13855.7	'No_CC'	Disease resistance protein (CC-NBS-LRR class) family
NBS-LRR	Potri.T024900	Potri.T024900.1.p	NB-ARC,PF00931.23,LRR_8,PF13855.7	'No_CC'	NB-ARC domain-containing disease resistance protein
NBS	Potri.T024966	Potri.T024966.1.p	NB-ARC,PF00931.23	'No_CC'	NB-ARC domain-containing disease resistance protein
NBS-LRR	Potri.T025032	Potri.T025032.1.p	NB-ARC,PF00931.23,LRR_8,PF13855.7	'No_CC'	NB-ARC domain-containing disease resistance protein
NBS-LRR	Potri.T025164	Potri.T025164.1.p	LRR_8,PF13855.7,LRR_4,PF12799.8,NB-ARC,PF00931.23	'No_CC'	NB-ARC domain-containing disease resistance protein
NBS-LRR	Potri.T025230	Potri.T025230.1.p	NB-ARC,PF00931.23,LRR_8,PF13855.7	'No_CC'	NB-ARC domain-containing disease resistance protein
NBS-LRR	Potri.T025650	Potri.T025650.1.p	NB-ARC,PF00931.23,LRR_8,PF13855.7	'No_CC'	NB-ARC domain-containing disease resistance protein
NBS	Potri.T025900	Potri.T025900.1.p	NB-ARC,PF00931.23	'No_CC'	NB-ARC domain-containing disease resistance protein
NBS-LRR	Potri.T026200	Potri.T026200.2.p	NB-ARC,PF00931.23,LRR_8,PF13855.7,LRR_4,PF12799.8,ATPase_2,PF01637.19	'No_CC'	NB-ARC domain-containing disease resistance protein
NBS-LRR	Potri.T026360	Potri.T026360.1.p	NB-ARC,PF00931.23,LRR_8,PF13855.7,LRR_4,PF12799.8	'No_CC'	NB-ARC domain-containing disease resistance protein
NBS	Potri.T026540	Potri.T026540.1.p	NB-ARC,PF00931.23	'No_CC'	Disease resistance protein (CC-NBS-LRR class) family
NBS-LRR	Potri.T026700	Potri.T026700.1.p	NB-ARC,PF00931.23,LRR_8,PF13855.7,LRR_4,PF12799.8	'No_CC'	NB-ARC domain-containing disease resistance protein
NBS-LRR	Potri.T026800	Potri.T026800.1.p	NB-ARC,PF00931.23,LRR_8,PF13855.7	'No_CC'	LRR and NB-ARC domains-containing disease resistance protein
NBS-LRR	Potri.T026900	Potri.T026900.2.p	NB-ARC,PF00931.23,LRR_8,PF13855.7,LRR_4,PF12799.8	'No_CC'	NB-ARC domain-containing disease resistance protein
NBS-LRR	Potri.T027200	Potri.T027200.1.p	NB-ARC,PF00931.23,LRR_8,PF13855.7,LRR_4,PF12799.8	'No_CC'	NB-ARC domain-containing disease resistance protein
NBS-LRR	Potri.T027300	Potri.T027300.1.p	NB-ARC,PF00931.23,LRR_8,PF13855.7,LRR_4,PF12799.8,NACHT,PF05729.13	'No_CC'	NB-ARC domain-containing disease resistance protein
NBS-LRR	Potri.T027500	Potri.T027500.1.p	NB-ARC,PF00931.23,LRR_8,PF13855.7,LRR_4,PF12799.8	'No_CC'	NB-ARC domain-containing disease resistance protein
NBS-LRR	Potri.T027700	Potri.T027700.1.p	NB-ARC,PF00931.23,LRR_8,PF13855.7,AAA_22,PF13401.7,NACHT,PF05729.13	'No_CC'	NB-ARC domain-containing disease resistance protein
NBS-LRR	Potri.T028301	Potri.T028301.1.p	NB-ARC,PF00931.23,LRR_8,PF13855.7,LRR_4,PF12799.8	'No_CC'	NB-ARC domain-containing disease resistance protein
NBS-LRR	Potri.T028500	Potri.T028500.2.p	LRR_8,PF13855.7,LRR_4,PF12799.8	'No_CC'	NB-ARC domain-containing disease resistance protein
NBS-LRR	Potri.T028700	Potri.T028700.2.p	NB-ARC,PF00931.23,LRR_8,PF13855.7,LRR_4,PF12799.8	'No_CC'	NB-ARC domain-containing disease resistance protein
NBS-LRR	Potri.T029000	Potri.T029000.1.p	NB-ARC,PF00931.23,LRR_8,PF13855.7	'No_CC'	NB-ARC domain-containing disease resistance protein
TIR-NBS	Potri.T037433	Potri.T037433.1.p	TIR,PF01582.21,NB-ARC,PF00931.23,TIR_2,PF13676.7,AAA_16,PF13191.7	'No_CC'	Disease resistance protein (TIR-NBS-LRR class) family
TIR-NBS-LRR	Potri.T037601	Potri.T037601.1.p	TIR,PF01582.21,NB-ARC,PF00931.23,TIR_2,PF13676.7,LRR_8,PF13855.7,LRR_4,PF12799.8	'No_CC'	transmembrane receptors;ATP binding
TIR-NBS	Potri.T037900	Potri.T037900.1.p	TIR,PF01582.21,NB-ARC,PF00931.23,TIR_2,PF13676.7	'No_CC'	transmembrane receptors;ATP binding
TIR-NBS-LRR	Potri.T038300	Potri.T038300.2.p	RVT_2,PF07727.15,TIR,PF01582.21,NB-ARC,PF00931.23,TIR_2,PF13676.7,LRR_8,PF13855.7	'No_CC'	Disease resistance protein (TIR-NBS-LRR class) family
TIR-NBS-LRR	Potri.T038900	Potri.T038900.1.p	TIR,PF01582.21,NB-ARC,PF00931.23,TIR_2,PF13676.7,LRR_8,PF13855.7	'No_CC'	transmembrane receptors;ATP binding
TIR-NBS-LRR	Potri.T039100	Potri.T039100.1.p	TIR,PF01582.21,NB-ARC,PF00931.23,TIR_2,PF13676.7,LRR_8,PF13855.7,LRR_4,PF12799.8,AAA_16,PF13191.7	'No_CC'	transmembrane receptors;ATP binding
TIR-NBS-LRR	Potri.T039300	Potri.T039300.1.p	NB-ARC,PF00931.23,LRR_8,PF13855.7,TIR,PF01582.21	'No_CC'	transmembrane receptors;ATP binding
NBS-LRR	Potri.T039450	Potri.T039450.1.p	NB-ARC,PF00931.23,LRR_8,PF13855.7	'No_CC'	disease resistance protein (TIR-NBS-LRR class), putative
TIR-NBS-LRR	Potri.T039601	Potri.T039601.1.p	TIR,PF01582.21,NB-ARC,PF00931.23,TIR_2,PF13676.7,LRR_8,PF13855.7	'No_CC'	Disease resistance protein (TIR-NBS-LRR class) family
TIR-NBS	Potri.T039900	Potri.T039900.1.p	TIR,PF01582.21,NB-ARC,PF00931.23,TIR_2,PF13676.7	'No_CC'	Disease resistance protein (TIR-NBS-LRR class) family
CC-NBS-LRR	Potri.T040600	Potri.T040600.1.p	Rx_N,PF18052.2,NB-ARC,PF00931.23,LRR_4,PF12799.8,LRR_8,PF13855.7	'CC_region'	NB-ARC domain-containing disease resistance protein
NBS	Potri.T044500	Potri.T044500.2.p	NB-ARC,PF00931.23,ATPase_2,PF01637.19,AAA_22,PF13401.7	'No_CC'	NB-ARC domain-containing disease resistance protein
NBS	Potri.T044600	Potri.T044600.1.p	NB-ARC,PF00931.23	'No_CC'	NB-ARC domain-containing disease resistance protein
NBS-LRR	Potri.T044800	Potri.T044800.1.p	NB-ARC,PF00931.23,LRR_8,PF13855.7,NACHT,PF05729.13	'No_CC'	NB-ARC domain-containing disease resistance protein
NBS-LRR	Potri.T045000	Potri.T045000.1.p	NB-ARC,PF00931.23,LRR_8,PF13855.7,LRR_4,PF12799.8,NACHT,PF05729.13	'No_CC'	LRR and NB-ARC domains-containing disease resistance protein
NBS-LRR	Potri.T045200	Potri.T045200.1.p	NB-ARC,PF00931.23,LRR_8,PF13855.7,NACHT,PF05729.13,LRR_4,PF12799.8,AAA_5,PF07728.15,ATPase_2,PF01637.19,AAA_22,PF13401.7	'No_CC'	LRR and NB-ARC domains-containing disease resistance protein
CC-NBS-LRR	Potri.T045300	Potri.T045300.3.p	NB-ARC,PF00931.23,LRR_8,PF13855.7,LRR_4,PF12799.8,NACHT,PF05729.13	'CC_region'	LRR and NB-ARC domains-containing disease resistance protein
NBS-LRR	Potri.T045900	Potri.T045900.1.p	LRR_4,PF12799.8,LRR_8,PF13855.7	'No_CC'	Disease resistance protein (CC-NBS-LRR class) family
NBS	Potri.T046051	Potri.T046051.1.p	NB-ARC,PF00931.23	'No_CC'	NB-ARC domain-containing disease resistance protein
TIR-NBS-LRR	Potri.T047500	Potri.T047500.2.p	TIR,PF01582.21,NB-ARC,PF00931.23,LRR_8,PF13855.7,TIR_2,PF13676.7,LRR_4,PF12799.8	'No_CC'	disease resistance protein (TIR-NBS-LRR class), putative
TIR-NBS-LRR	Potri.T047600	Potri.T047600.1.p	TIR,PF01582.21,NB-ARC,PF00931.23,LRR_4,PF12799.8,TIR_2,PF13676.7,LRR_8,PF13855.7,ATPase_2,PF01637.19,AAA_16,PF13191.7	'No_CC'	disease resistance protein (TIR-NBS-LRR class)
TIR-NBS-LRR	Potri.T047700	Potri.T047700.2.p	TIR,PF01582.21,NB-ARC,PF00931.23,LRR_8,PF13855.7,TIR_2,PF13676.7,LRR_4,PF12799.8	'No_CC'	disease resistance protein (TIR-NBS-LRR class)
TIR-NBS-LRR	Potri.T047900	Potri.T047900.1.p	TIR,PF01582.21,NB-ARC,PF00931.23,LRR_8,PF13855.7,TIR_2,PF13676.7,LRR_4,PF12799.8	'No_CC'	disease resistance protein (TIR-NBS-LRR class), putative
TIR-NBS-LRR	Potri.T048266	Potri.T048266.1.p	TIR,PF01582.21,LRR_4,PF12799.8,NB-ARC,PF00931.23,LRR_8,PF13855.7,TIR_2,PF13676.7,LRR_1,PF00560.34	'No_CC'	disease resistance protein (TIR-NBS-LRR class)
NBS-LRR	Potri.T049000	Potri.T049000.1.p	NB-ARC,PF00931.23,LRR_8,PF13855.7	'No_CC'	Disease resistance protein (TIR-NBS-LRR class) family
TIR-NBS	Potri.T049400	Potri.T049400.1.p	TIR,PF01582.21,NB-ARC,PF00931.23,TIR_2,PF13676.7	'No_CC'	Disease resistance protein (TIR-NBS-LRR class) family
TIR-NBS	Potri.T049700	Potri.T049700.1.p	TIR,PF01582.21,NB-ARC,PF00931.23,TIR_2,PF13676.7	'No_CC'	Disease resistance protein (TIR-NBS-LRR class) family
TIR-NBS-LRR	Potri.T050100	Potri.T050100.1.p	TIR,PF01582.21,LRR_4,PF12799.8,NB-ARC,PF00931.23,LRR_8,PF13855.7,TIR_2,PF13676.7,KRE1,PF17056.6	'No_CC'	disease resistance protein (TIR-NBS-LRR class)
TIR-NBS-LRR	Potri.T050200	Potri.T050200.2.p	TIR,PF01582.21,LRR_4,PF12799.8,NB-ARC,PF00931.23,LRR_8,PF13855.7,TIR_2,PF13676.7	'No_CC'	disease resistance protein (TIR-NBS-LRR class)
NBS	Potri.T052001	Potri.T052001.1.p	NB-ARC,PF00931.23	'No_CC'	NB-ARC domain-containing disease resistance protein
NBS	Potri.T052300	Potri.T052300.1.p	NB-ARC,PF00931.23	'No_CC'	Disease resistance protein (CC-NBS-LRR class) family
NBS-LRR	Potri.T052600	Potri.T052600.1.p	NB-ARC,PF00931.23,LRR_8,PF13855.7,LRR_4,PF12799.8	'No_CC'	NB-ARC domain-containing disease resistance protein
NBS-LRR	Potri.T052750	Potri.T052750.1.p	LRR_8,PF13855.7,NB-ARC,PF00931.23,LRR_4,PF12799.8	'No_CC'	NB-ARC domain-containing disease resistance protein
NBS-LRR	Potri.T053000	Potri.T053000.2.p	NB-ARC,PF00931.23,LRR_8,PF13855.7,LRR_4,PF12799.8	'No_CC'	NB-ARC domain-containing disease resistance protein
NBS	Potri.T059100	Potri.T059100.1.p	NB-ARC,PF00931.23	'No_CC'	LRR and NB-ARC domains-containing disease resistance protein
CC-NBS-LRR	Potri.T060300	Potri.T060300.1.p	NB-ARC,PF00931.23,Rx_N,PF18052.2,LRR_8,PF13855.7	'CC_region'	NB-ARC domain-containing disease resistance protein
NBS	Potri.T060400	Potri.T060400.1.p	NB-ARC,PF00931.23	'No_CC'	NB-ARC domain-containing disease resistance protein
CC-NBS	Potri.T060450	Potri.T060450.1.p	NB-ARC,PF00931.23,Rx_N,PF18052.2	'CC_region'	NB-ARC domain-containing disease resistance protein
CC-NBS	Potri.T060500	Potri.T060500.1.p	NB-ARC,PF00931.23,Rx_N,PF18052.2	'CC_region'	NB-ARC domain-containing disease resistance protein
CC-NBS-LRR	Potri.T060700	Potri.T060700.1.p	NB-ARC,PF00931.23,Rx_N,PF18052.2,LRR_8,PF13855.7	'CC_region'	NB-ARC domain-containing disease resistance protein
CC-NBS	Potri.T065900	Potri.T065900.1.p	NB-ARC,PF00931.23	'CC_region'	NB-ARC domain-containing disease resistance protein
NBS-LRR	Potri.T066250	Potri.T066250.1.p	LRR_4,PF12799.8	'No_CC'	NB-ARC domain-containing disease resistance protein
NBS	Potri.T067701	Potri.T067701.1.p	NB-ARC,PF00931.23	'No_CC'	Disease resistance protein (TIR-NBS-LRR class) family
TIR-NBS	Potri.T068601	Potri.T068601.1.p	TIR,PF01582.21,NB-ARC,PF00931.23,TIR_2,PF13676.7	'No_CC'	Disease resistance protein (TIR-NBS-LRR class) family
NBS	Potri.T068700	Potri.T068700.1.p	NB-ARC,PF00931.23,ATPase_2,PF01637.19	'No_CC'	transmembrane receptors;ATP binding
TIR-NBS-LRR	Potri.T069201	Potri.T069201.1.p	TIR,PF01582.21,NB-ARC,PF00931.23,TIR_2,PF13676.7,LRR_8,PF13855.7	'No_CC'	transmembrane receptors;ATP binding
TIR-NBS	Potri.T069500	Potri.T069500.1.p	TIR,PF01582.21,NB-ARC,PF00931.23,TIR_2,PF13676.7	'No_CC'	Disease resistance protein (TIR-NBS-LRR class) family
TIR-NBS-LRR	Potri.T073566	Potri.T073566.1.p	LRR_8,PF13855.7,TIR,PF01582.21,LRR_4,PF12799.8	'No_CC'	Disease resistance protein (TIR-NBS-LRR class) family
TIR-NBS	Potri.T073632	Potri.T073632.1.p	TIR,PF01582.21,TIR_2,PF13676.7,NB-ARC,PF00931.23	'No_CC'	disease resistance protein (TIR-NBS-LRR class), putative
TIR-NBS	Potri.T073700	Potri.T073700.1.p	TIR,PF01582.21,NB-ARC,PF00931.23,TIR_2,PF13676.7	'No_CC'	disease resistance protein (TIR-NBS-LRR class), putative
TIR-NBS-LRR	Potri.T073800	Potri.T073800.2.p	TIR,PF01582.21,NB-ARC,PF00931.23,TIR_2,PF13676.7,LRR_8,PF13855.7,LRR_4,PF12799.8	'No_CC'	disease resistance protein (TIR-NBS-LRR class), putative
TIR-NBS-LRR	Potri.T074000	Potri.T074000.2.p	TIR,PF01582.21,NB-ARC,PF00931.23,TIR_2,PF13676.7,LRR_8,PF13855.7,LRR_4,PF12799.8	'CC_region'	disease resistance protein (TIR-NBS-LRR class), putative
TIR-NBS-LRR	Potri.T074200	Potri.T074200.2.p	TIR,PF01582.21,NB-ARC,PF00931.23,NAM,PF02365.16,TIR_2,PF13676.7,LRR_4,PF12799.8,LRR_8,PF13855.7	'No_CC'	disease resistance protein (TIR-NBS-LRR class), putative
TIR-NBS	Potri.T074300	Potri.T074300.1.p	TIR,PF01582.21,NB-ARC,PF00931.23,TIR_2,PF13676.7	'CC_region'	disease resistance protein (TIR-NBS-LRR class), putative
NBS-LRR	Potri.T077000	Potri.T077000.3.p	NB-ARC,PF00931.23,LRR_8,PF13855.7,LRR_4,PF12799.8	'No_CC'	disease resistance protein (TIR-NBS-LRR class), putative
TIR-NBS-LRR	Potri.T077100	Potri.T077100.1.p	TIR,PF01582.21,LRR_4,PF12799.8,NB-ARC,PF00931.23,LRR_8,PF13855.7,TIR_2,PF13676.7	'No_CC'	disease resistance protein (TIR-NBS-LRR class), putative
NBS	Potri.T077200	Potri.T077200.5.p	NB-ARC,PF00931.23	'No_CC'	disease resistance protein (TIR-NBS-LRR class), putative
CC-NBS-LRR	Potri.T077400	Potri.T077400.2.p	LRR_4,PF12799.8,LRR_8,PF13855.7,NB-ARC,PF00931.23	'CC_region'	Disease resistance protein (TIR-NBS-LRR class) family
TIR-NBS-LRR	Potri.T077600	Potri.T077600.1.p	TIR,PF01582.21,NB-ARC,PF00931.23,LRR_8,PF13855.7,LRR_4,PF12799.8,TIR_2,PF13676.7	'No_CC'	Disease resistance protein (TIR-NBS-LRR class) family
CC-NBS	Potri.T087700	Potri.T087700.2.p	NB-ARC,PF00931.23	'CC_region'	NB-ARC domain-containing disease resistance protein
CC-NBS-LRR	Potri.T092600	Potri.T092600.3.p	NB-ARC,PF00931.23,LRR_8,PF13855.7	'CC_region'	NB-ARC domain-containing disease resistance protein
NBS-LRR	Potri.T093200	Potri.T093200.2.p	NB-ARC,PF00931.23,LRR_8,PF13855.7	'No_CC'	NB-ARC domain-containing disease resistance protein
NBS-LRR	Potri.T096100	Potri.T096100.1.p	NB-ARC,PF00931.23,Rx_N,PF18052.2,LRR_8,PF13855.7,LRR_4,PF12799.8	'No_CC'	LRR and NB-ARC domains-containing disease resistance protein
CC-NBS-LRR	Potri.T098700	Potri.T098700.2.p	NB-ARC,PF00931.23,Rx_N,PF18052.2,LRR_4,PF12799.8,AAA_16,PF13191.7	'CC_region'	LRR and NB-ARC domains-containing disease resistance protein
CC-NBS	Potri.T100800	Potri.T100800.3.p	NB-ARC,PF00931.23	'CC_region'	NB-ARC domain-containing disease resistance protein
NBS-LRR	Potri.T105500	Potri.T105500.1.p	NB-ARC,PF00931.23,Rx_N,PF18052.2,LRR_8,PF13855.7,LRR_4,PF12799.8	'No_CC'	NB-ARC domain-containing disease resistance protein
NBS-LRR	Potri.T105600	Potri.T105600.1.p	NB-ARC,PF00931.23,Rx_N,PF18052.2,LRR_8,PF13855.7,LRR_4,PF12799.8	'No_CC'	LRR and NB-ARC domains-containing disease resistance protein
NBS	Potri.T107066	Potri.T107066.1.p	NB-ARC,PF00931.23,zf-BED,PF02892.16	'No_CC'	Disease resistance protein (CC-NBS-LRR class) family
TIR-NBS	Potri.T112700	Potri.T112700.1.p	TIR,PF01582.21,NB-ARC,PF00931.23,TIR_2,PF13676.7	'No_CC'	Disease resistance protein (TIR-NBS-LRR class) family
NBS-LRR	Potri.T116100	Potri.T116100.1.p	NB-ARC,PF00931.23,LRR_8,PF13855.7,LRR_4,PF12799.8,AAA_16,PF13191.7	'No_CC'	LRR and NB-ARC domains-containing disease resistance protein
NBS-LRR	Potri.T116200	Potri.T116200.1.p	NB-ARC,PF00931.23,Rx_N,PF18052.2,LRR_8,PF13855.7,LRR_4,PF12799.8	'No_CC'	LRR and NB-ARC domains-containing disease resistance protein
NBS-LRR	Potri.T117700	Potri.T117700.2.p	NB-ARC,PF00931.23,Rx_N,PF18052.2,LRR_8,PF13855.7,LRR_4,PF12799.8	'No_CC'	NB-ARC domain-containing disease resistance protein
NBS	Potri.T117800	Potri.T117800.1.p	NB-ARC,PF00931.23,Rx_N,PF18052.2	'No_CC'	NB-ARC domain-containing disease resistance protein
NBS-LRR	Potri.T118300	Potri.T118300.3.p	NB-ARC,PF00931.23,Rx_N,PF18052.2,LRR_4,PF12799.8,LRR_8,PF13855.7	'No_CC'	NB-ARC domain-containing disease resistance protein
NBS-LRR	Potri.T118400	Potri.T118400.1.p	NB-ARC,PF00931.23,LRR_8,PF13855.7	'No_CC'	NB-ARC domain-containing disease resistance protein
TIR-NBS	Potri.T127700	Potri.T127700.1.p	TIR,PF01582.21,NB-ARC,PF00931.23,TIR_2,PF13676.7	'No_CC'	Disease resistance protein (TIR-NBS-LRR class) family
TIR-NBS-LRR	Potri.T127900	Potri.T127900.1.p	TIR,PF01582.21,NB-ARC,PF00931.23,TIR_2,PF13676.7,LRR_4,PF12799.8,LRR_8,PF13855.7,AAA_16,PF13191.7	'No_CC'	Disease resistance protein (TIR-NBS-LRR class) family
TIR-NBS-LRR	Potri.T128200	Potri.T128200.1.p	TIR,PF01582.21,NB-ARC,PF00931.23,TIR_2,PF13676.7,LRR_4,PF12799.8,LRR_8,PF13855.7,AAA_16,PF13191.7	'No_CC'	Disease resistance protein (TIR-NBS-LRR class) family
TIR-NBS-LRR	Potri.T129000	Potri.T129000.2.p	TIR,PF01582.21,NB-ARC,PF00931.23,TIR_2,PF13676.7,LRR_4,PF12799.8	'CC_region'	disease resistance protein (TIR-NBS-LRR class), putative
TIR-NBS	Potri.T129266	Potri.T129266.1.p	TIR,PF01582.21,NB-ARC,PF00931.23,TIR_2,PF13676.7	'No_CC'	disease resistance protein (TIR-NBS-LRR class), putative
TIR-NBS-LRR	Potri.T129400	Potri.T129400.1.p	TIR,PF01582.21,NB-ARC,PF00931.23,TIR_2,PF13676.7,LRR_4,PF12799.8,LRR_8,PF13855.7	'No_CC'	Disease resistance protein (TIR-NBS-LRR class) family
NBS	Potri.T129600	Potri.T129600.2.p	NB-ARC,PF00931.23	'No_CC'	NB-ARC domain-containing disease resistance protein
NBS-LRR	Potri.T129700	Potri.T129700.2.p	NB-ARC,PF00931.23,LRR_8,PF13855.7	'No_CC'	NB-ARC domain-containing disease resistance protein
NBS	Potri.T129800	Potri.T129800.1.p	NB-ARC,PF00931.23,Rx_N,PF18052.2,AAA_16,PF13191.7,AAA_22,PF13401.7	'No_CC'	NB-ARC domain-containing disease resistance protein
NBS	Potri.T130200	Potri.T130200.1.p	NB-ARC,PF00931.23,Rx_N,PF18052.2,AAA_22,PF13401.7,NACHT,PF05729.13,AAA_16,PF13191.7	'No_CC'	NB-ARC domain-containing disease resistance protein
NBS-LRR	Potri.T130500	Potri.T130500.1.p	NB-ARC,PF00931.23,Rx_N,PF18052.2,LRR_4,PF12799.8,LRR_8,PF13855.7,AAA_22,PF13401.7	'No_CC'	NB-ARC domain-containing disease resistance protein
NBS-LRR	Potri.T130700	Potri.T130700.2.p	NB-ARC,PF00931.23,LRR_4,PF12799.8,AAA_22,PF13401.7,LRR_8,PF13855.7	'No_CC'	LRR and NB-ARC domains-containing disease resistance protein
NBS-LRR	Potri.T133200	Potri.T133200.1.p	NB-ARC,PF00931.23,Rx_N,PF18052.2,LRR_8,PF13855.7	'No_CC'	NB-ARC domain-containing disease resistance protein
NBS-LRR	Potri.T143000	Potri.T143000.1.p	NB-ARC,PF00931.23,Rx_N,PF18052.2,LRR_4,PF12799.8,AAA_14,PF13173.7	'No_CC'	NB-ARC domain-containing disease resistance protein
TIR-NBS	Potri.T154200	Potri.T154200.1.p	TIR,PF01582.21,NB-ARC,PF00931.23,TIR_2,PF13676.7	'No_CC'	disease resistance protein (TIR-NBS-LRR class), putative
NBS	Potri.T169100	Potri.T169100.1.p	Rx_N,PF18052.2,NB-ARC,PF00931.23	'No_CC'	NB-ARC domain-containing disease resistance protein
NBS	Potri.T169201	Potri.T169201.1.p	NB-ARC,PF00931.23	'No_CC'	NB-ARC domain-containing disease resistance protein
NBS	Potri.T174800	Potri.T174800.1.p	NB-ARC,PF00931.23	'No_CC'	NB-ARC domain-containing disease resistance protein
CC-NBS	Potri.T176000	Potri.T176000.2.p	NB-ARC,PF00931.23	'CC_region'	NB-ARC domain-containing disease resistance protein

[truncated: 9 more sheets: Rubus occidentalis, Rosa chinensis, Fragaria vesca, Malus x domestica, Malus baccata, Prunus persica, Prunus armeniaca, Pyrus bretschneideri, Pyrus betulifolia]
